# Supplementary material for: Neurons enhance blood–brain barrier function via upregulating claudin-5 and VE-cadherin expression due to glial cell line-derived neurotrophic factor secretion
Source: eLife journal article supplement (doi:10.7554/elife.96161), 2024-05-29

Figure 2A-Claudin-5

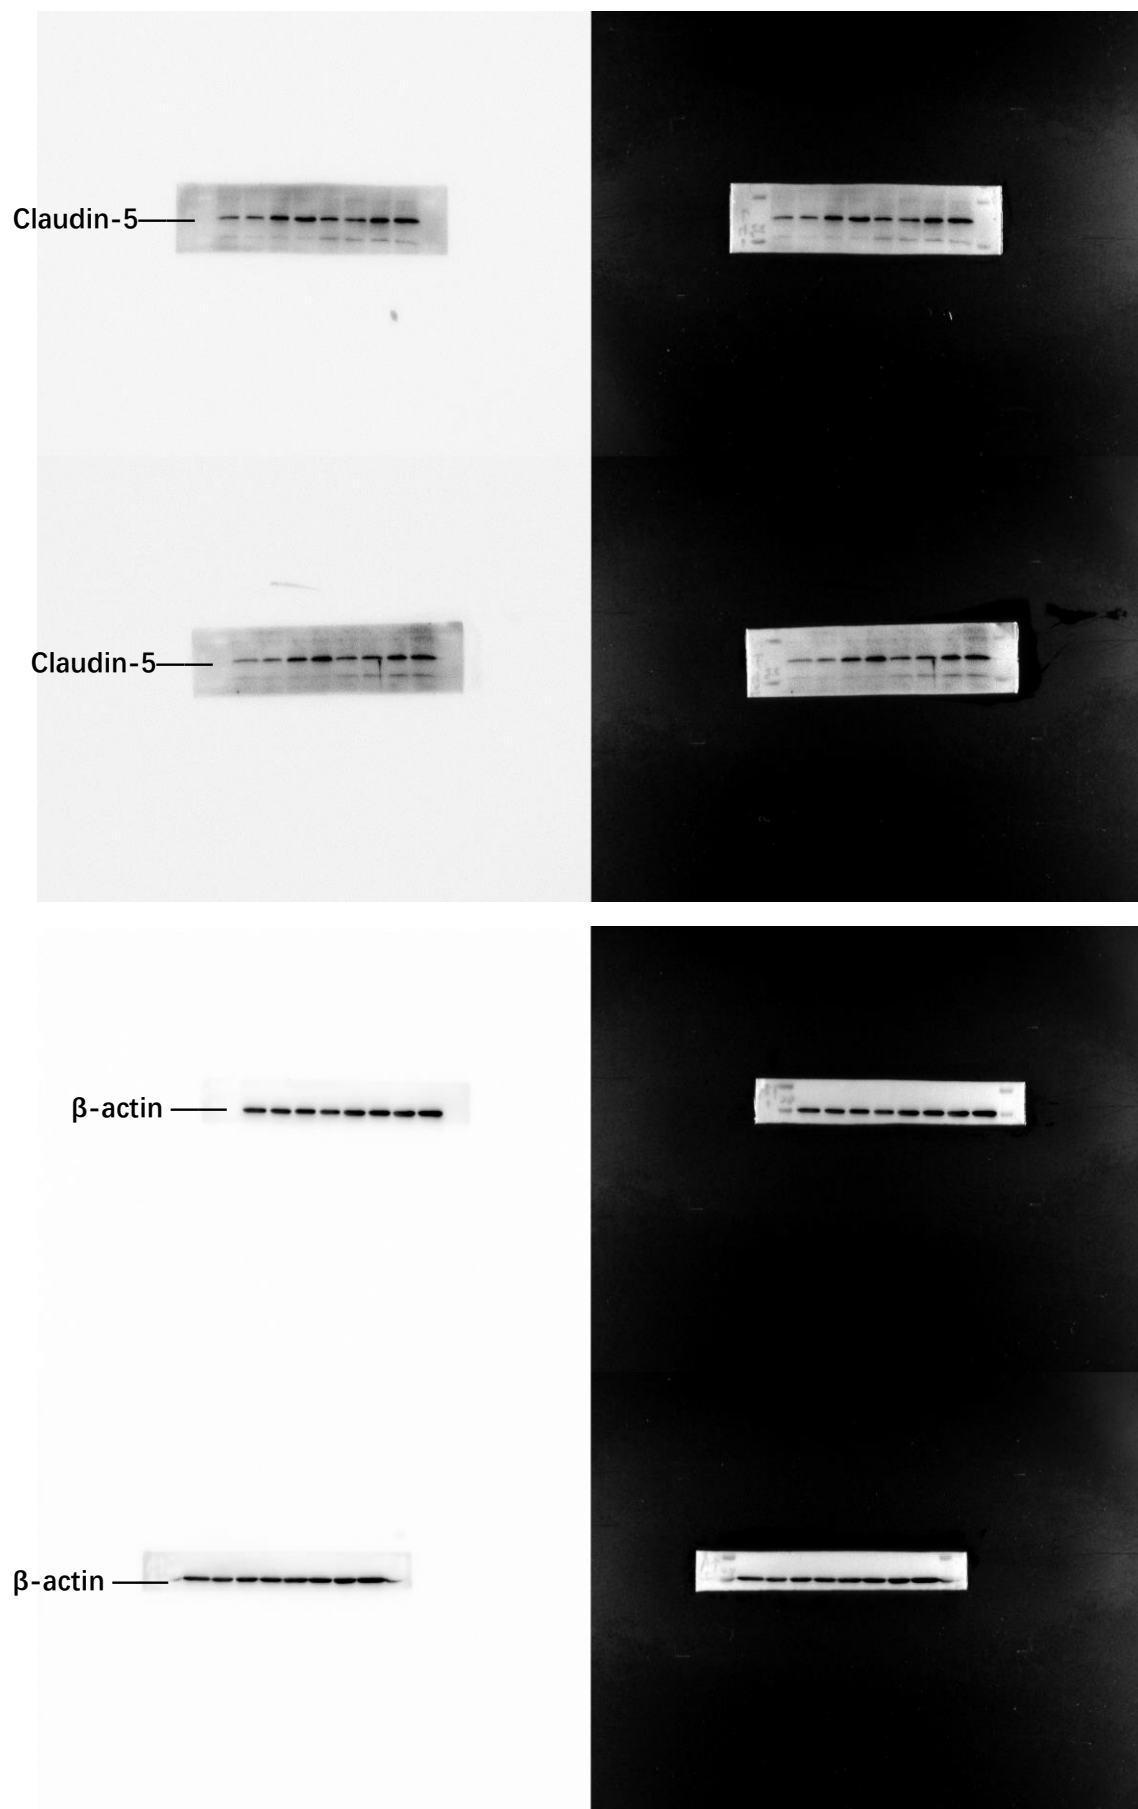

Figure 2A-VE-cadherin

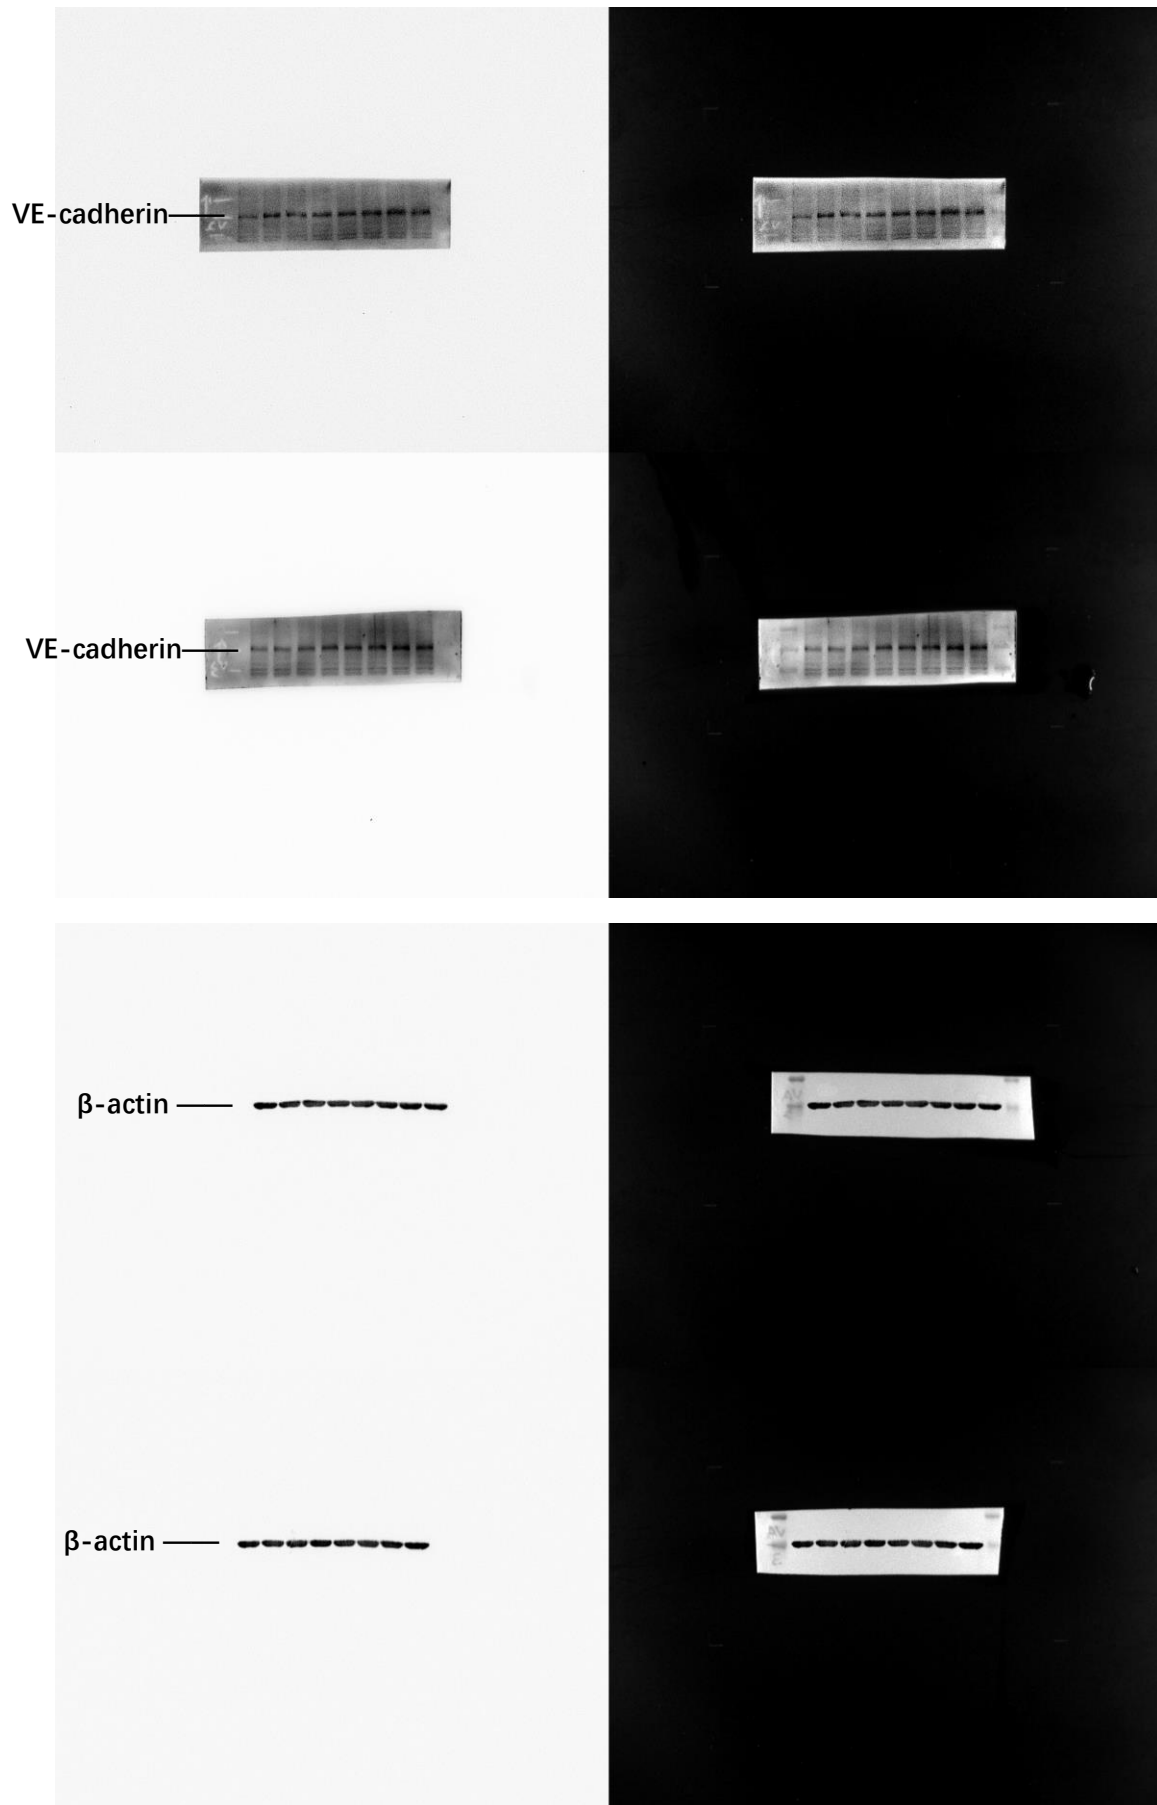

Figure 2D-Claudin-5

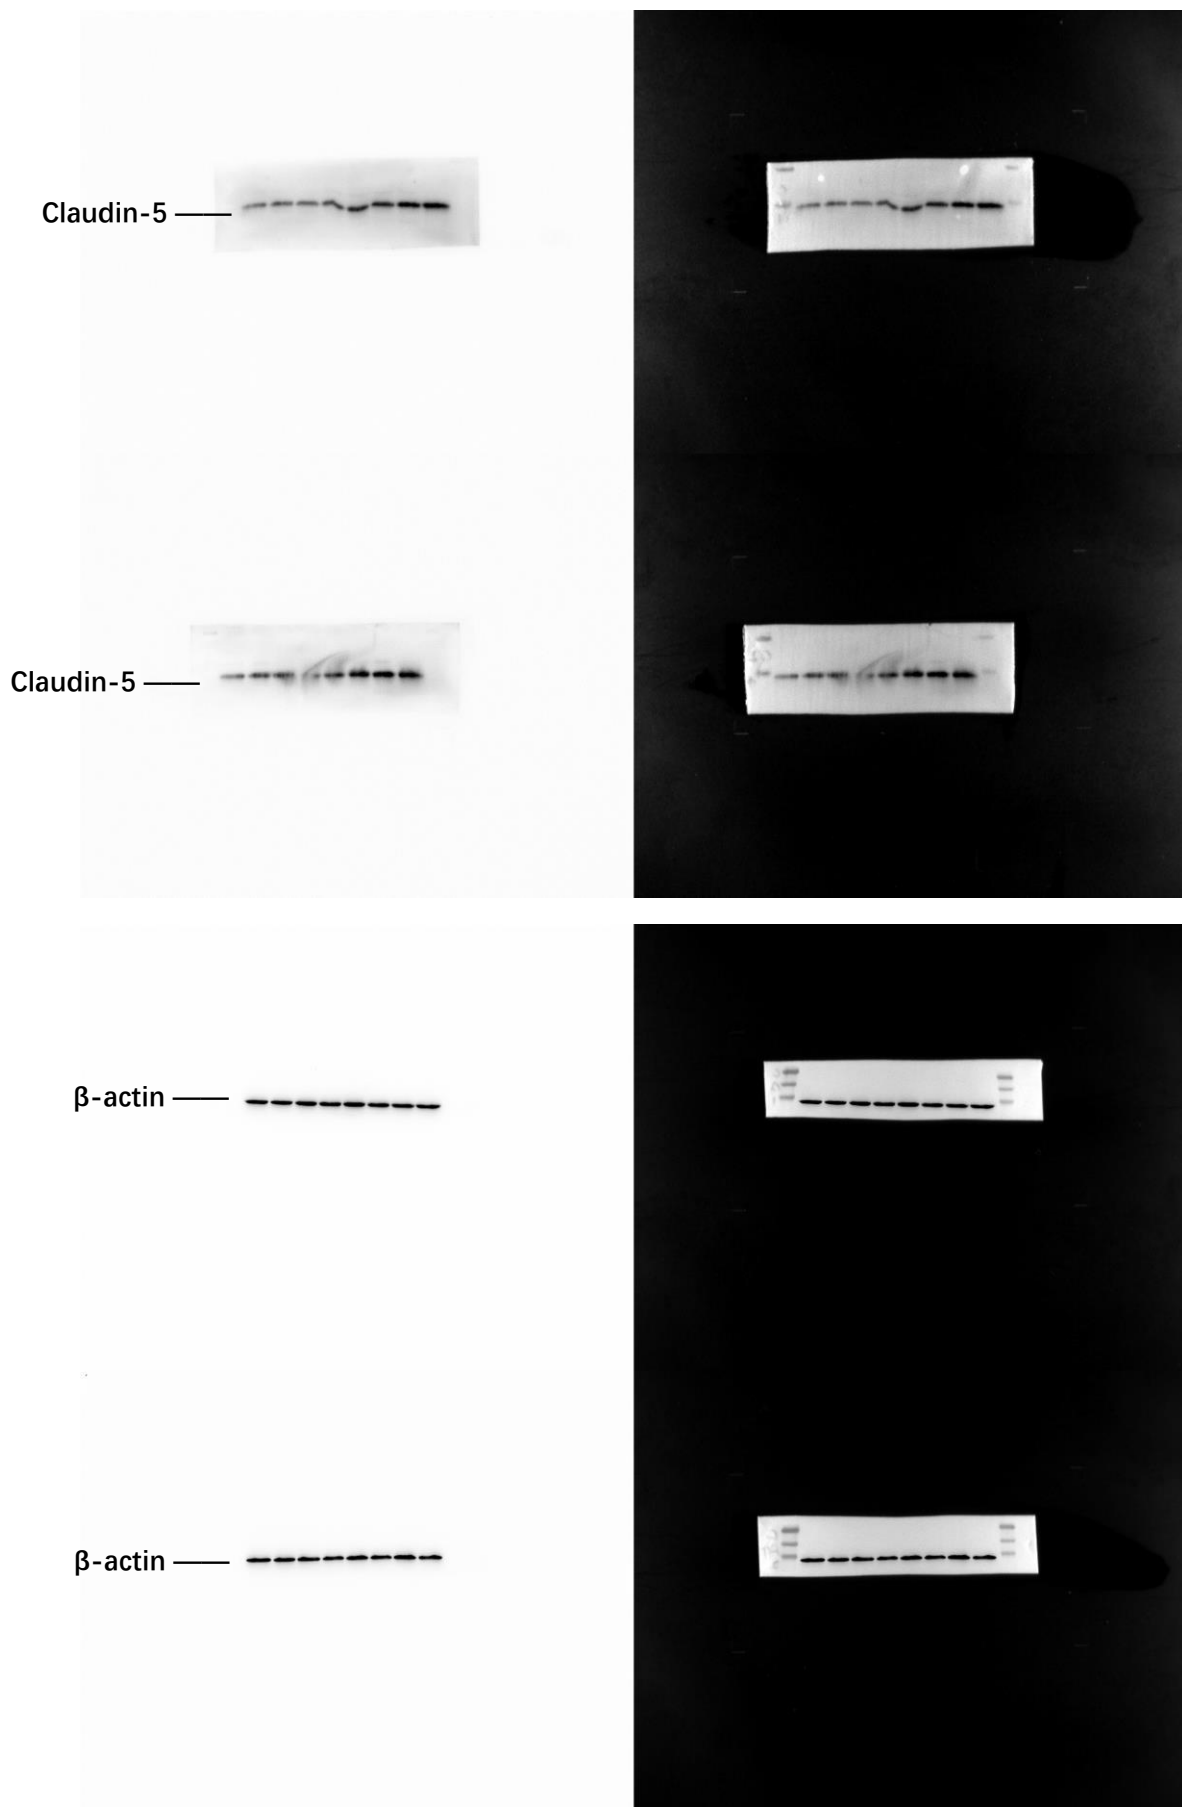

Figure 2D-VE-cadherin

VE-cadherin—

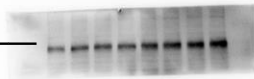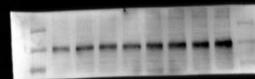

VE-cadherin—

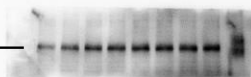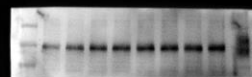

$\beta$ -actin —

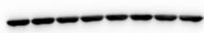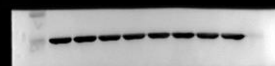

$\beta$ -actin —

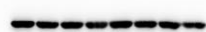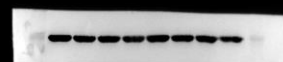

Figure 2E-Claudin-5

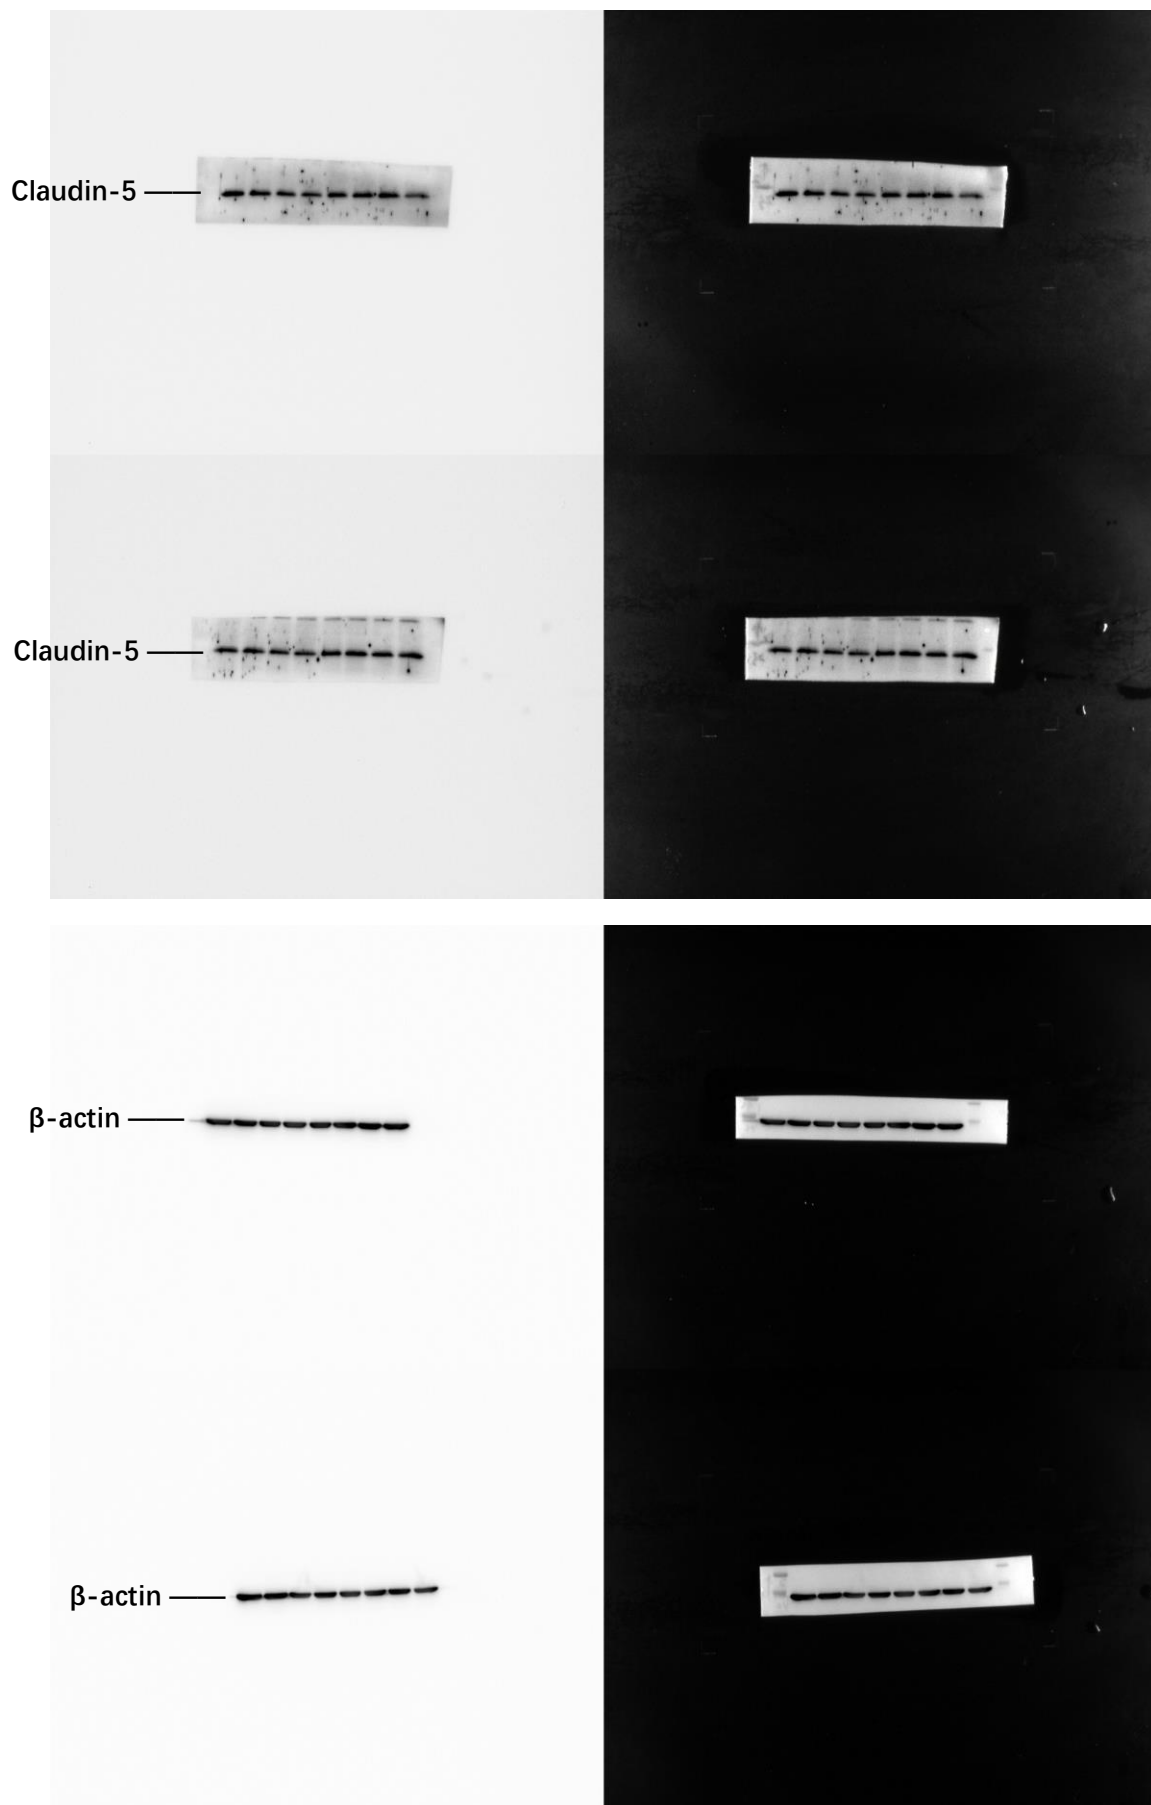

Figure 2E-VE-cadherin

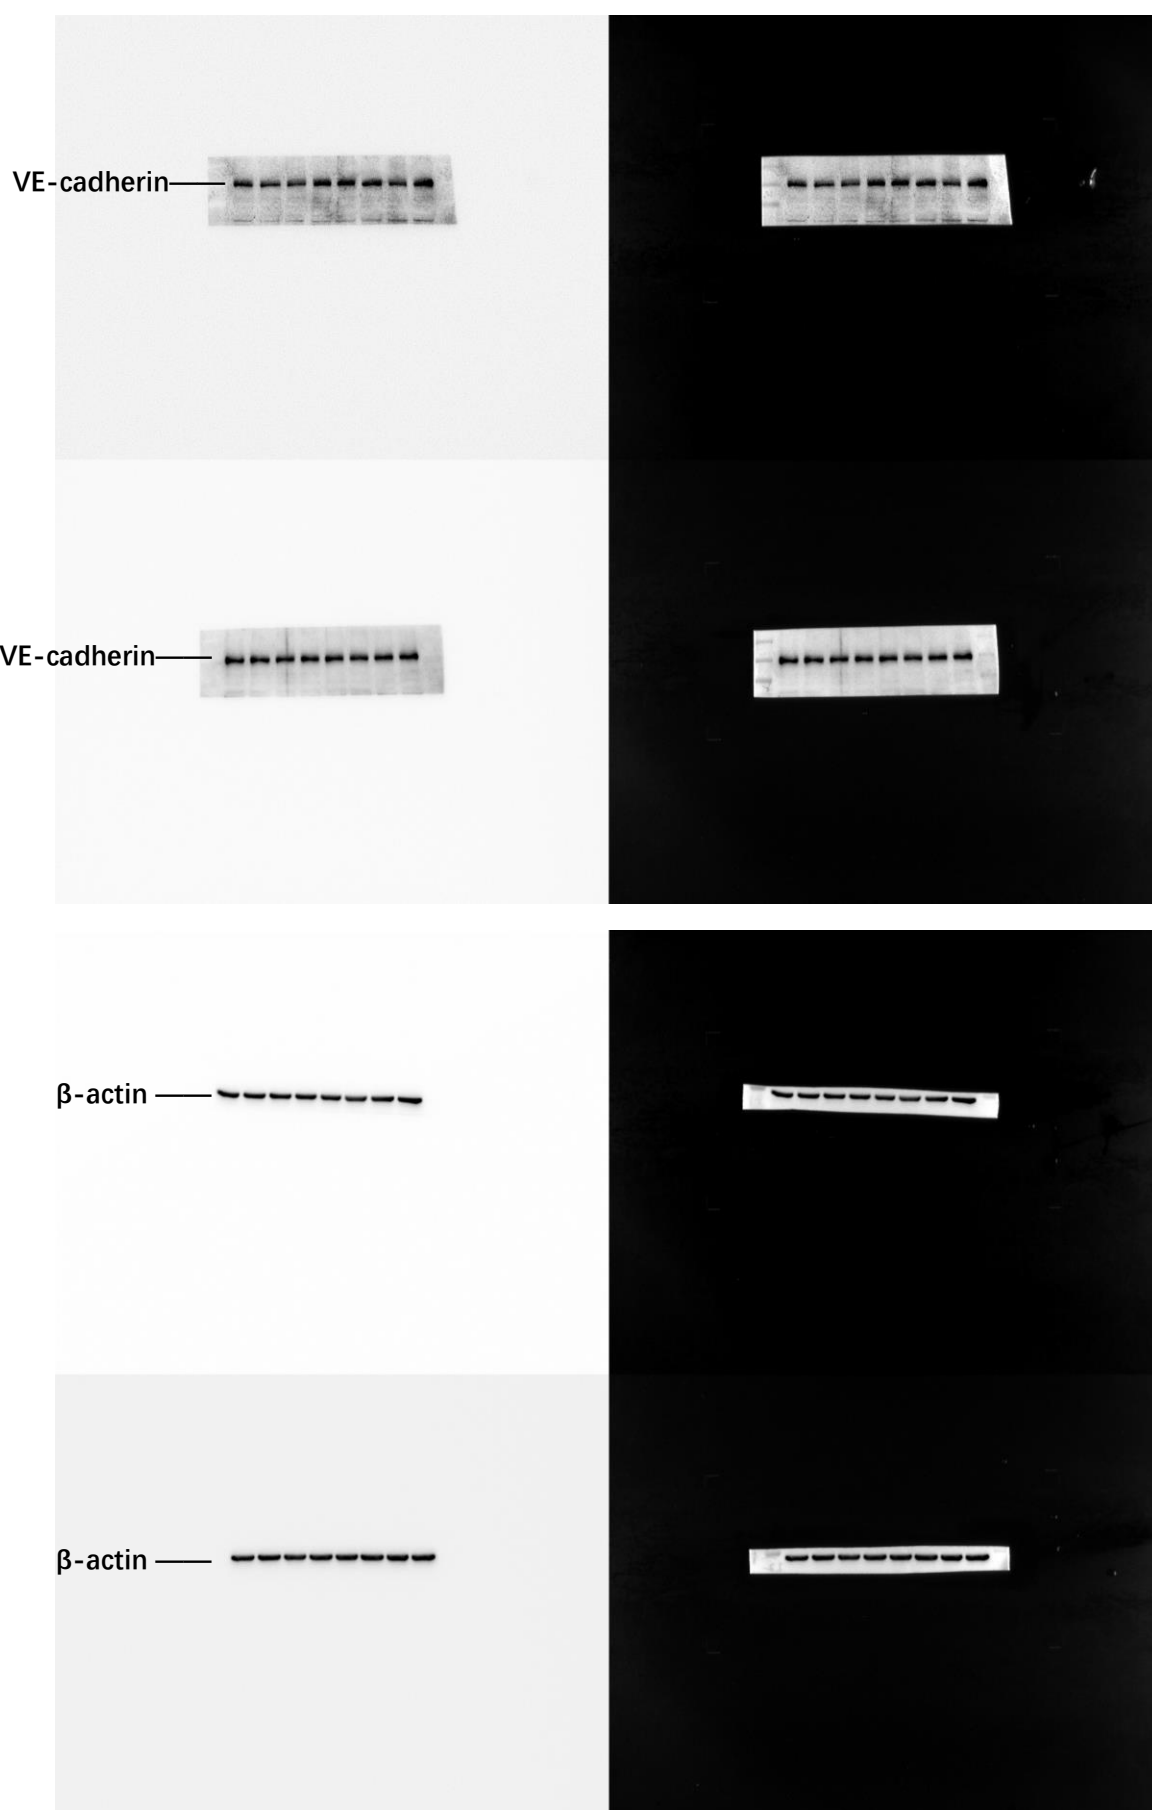

Figure 2F-Claudin-5

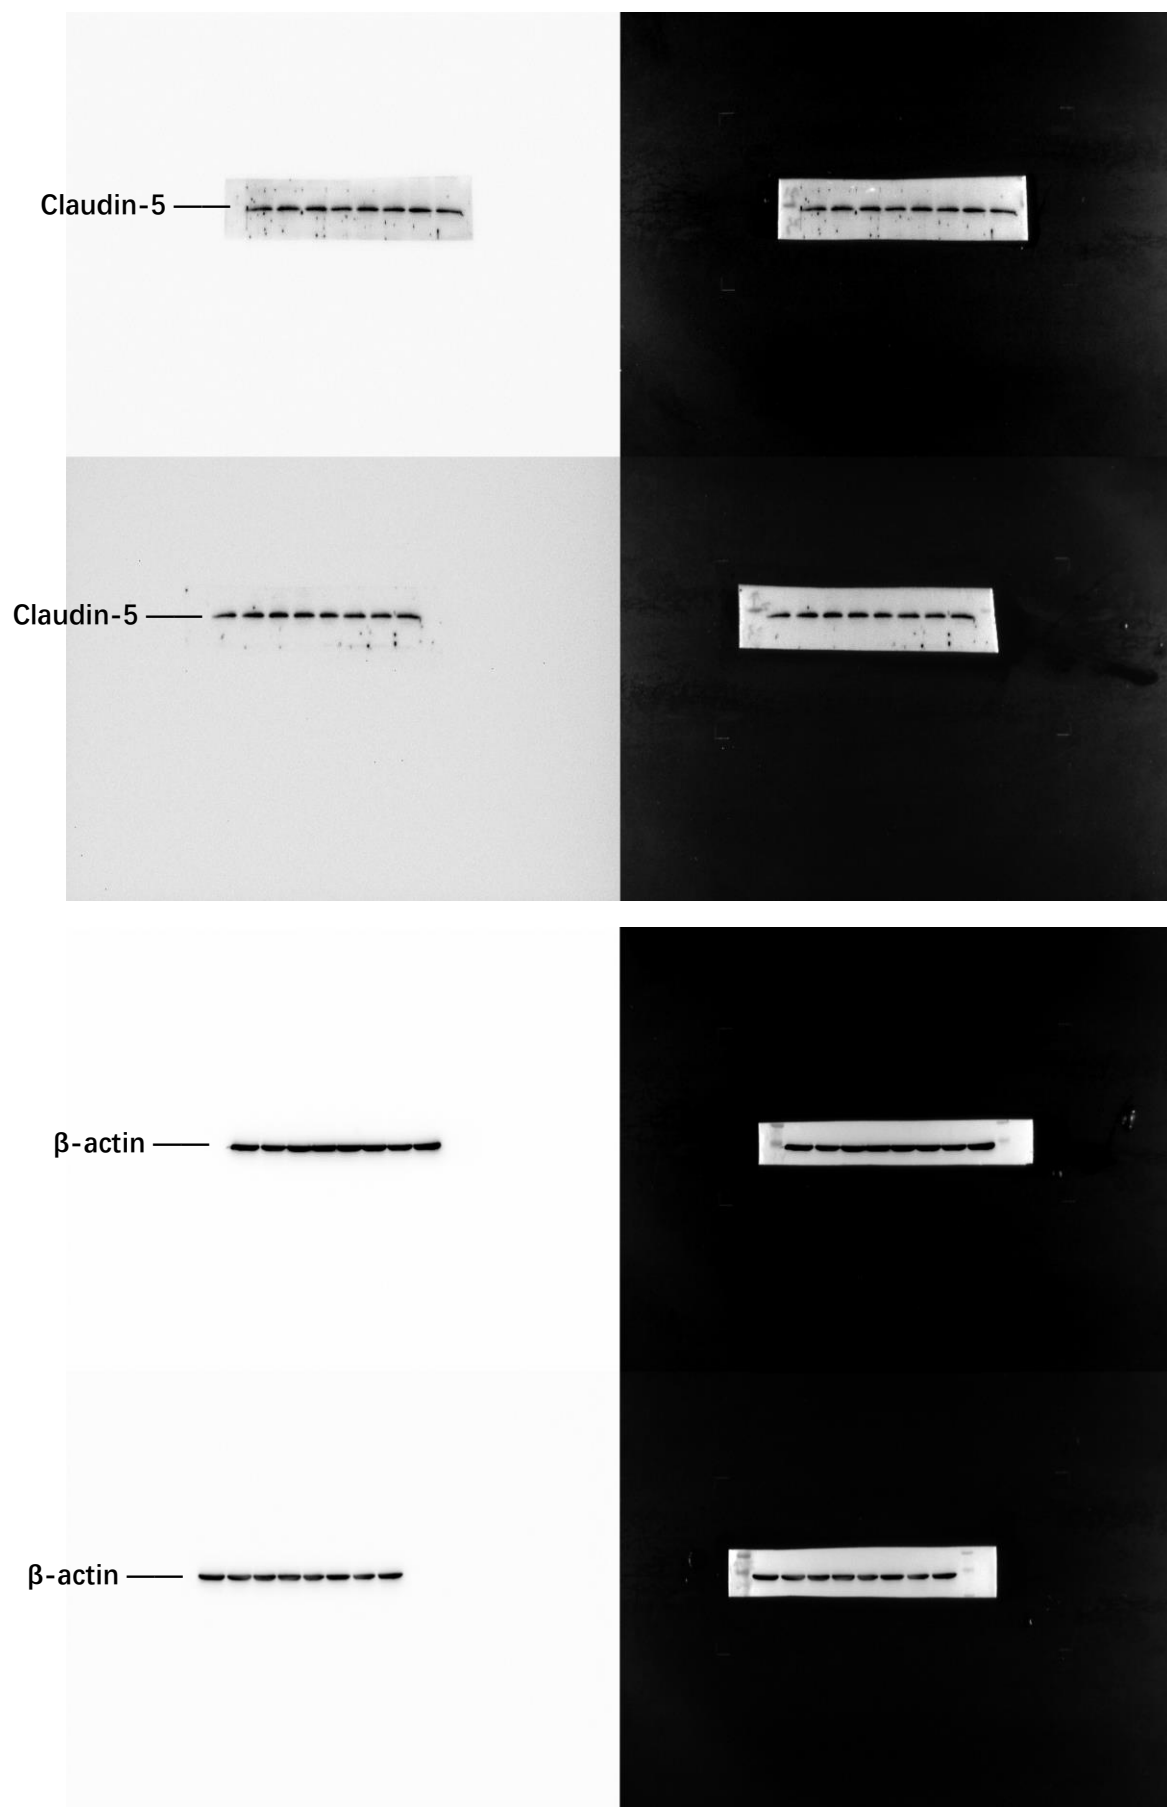

Figure 2F-VE-cadherin

VE-cadherin

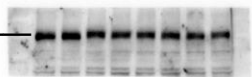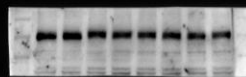

VE-cadherin

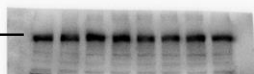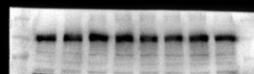

$\beta$ -actin

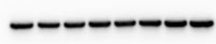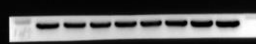

$\beta$ -actin

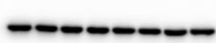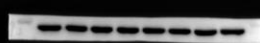



Figure 2G-Claudin-5

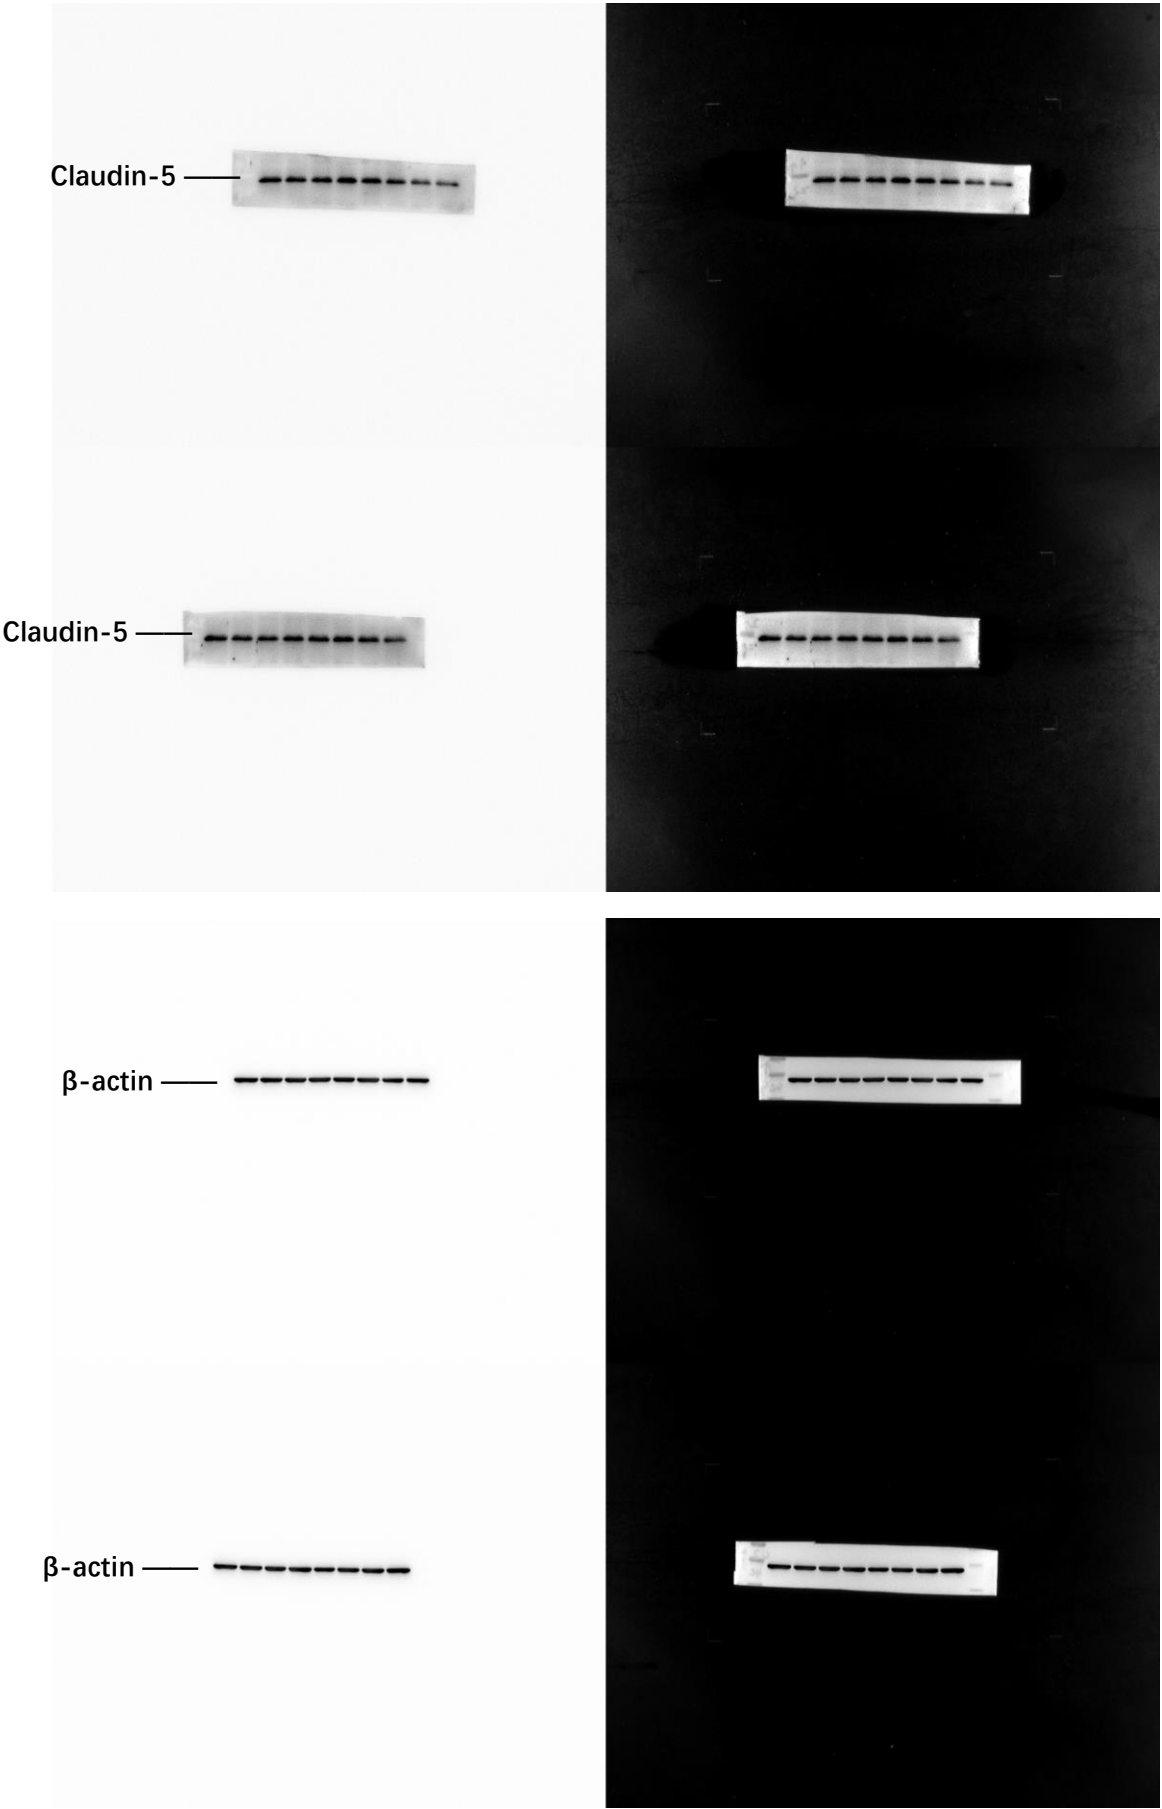

Figure 2G-VE-cadherin

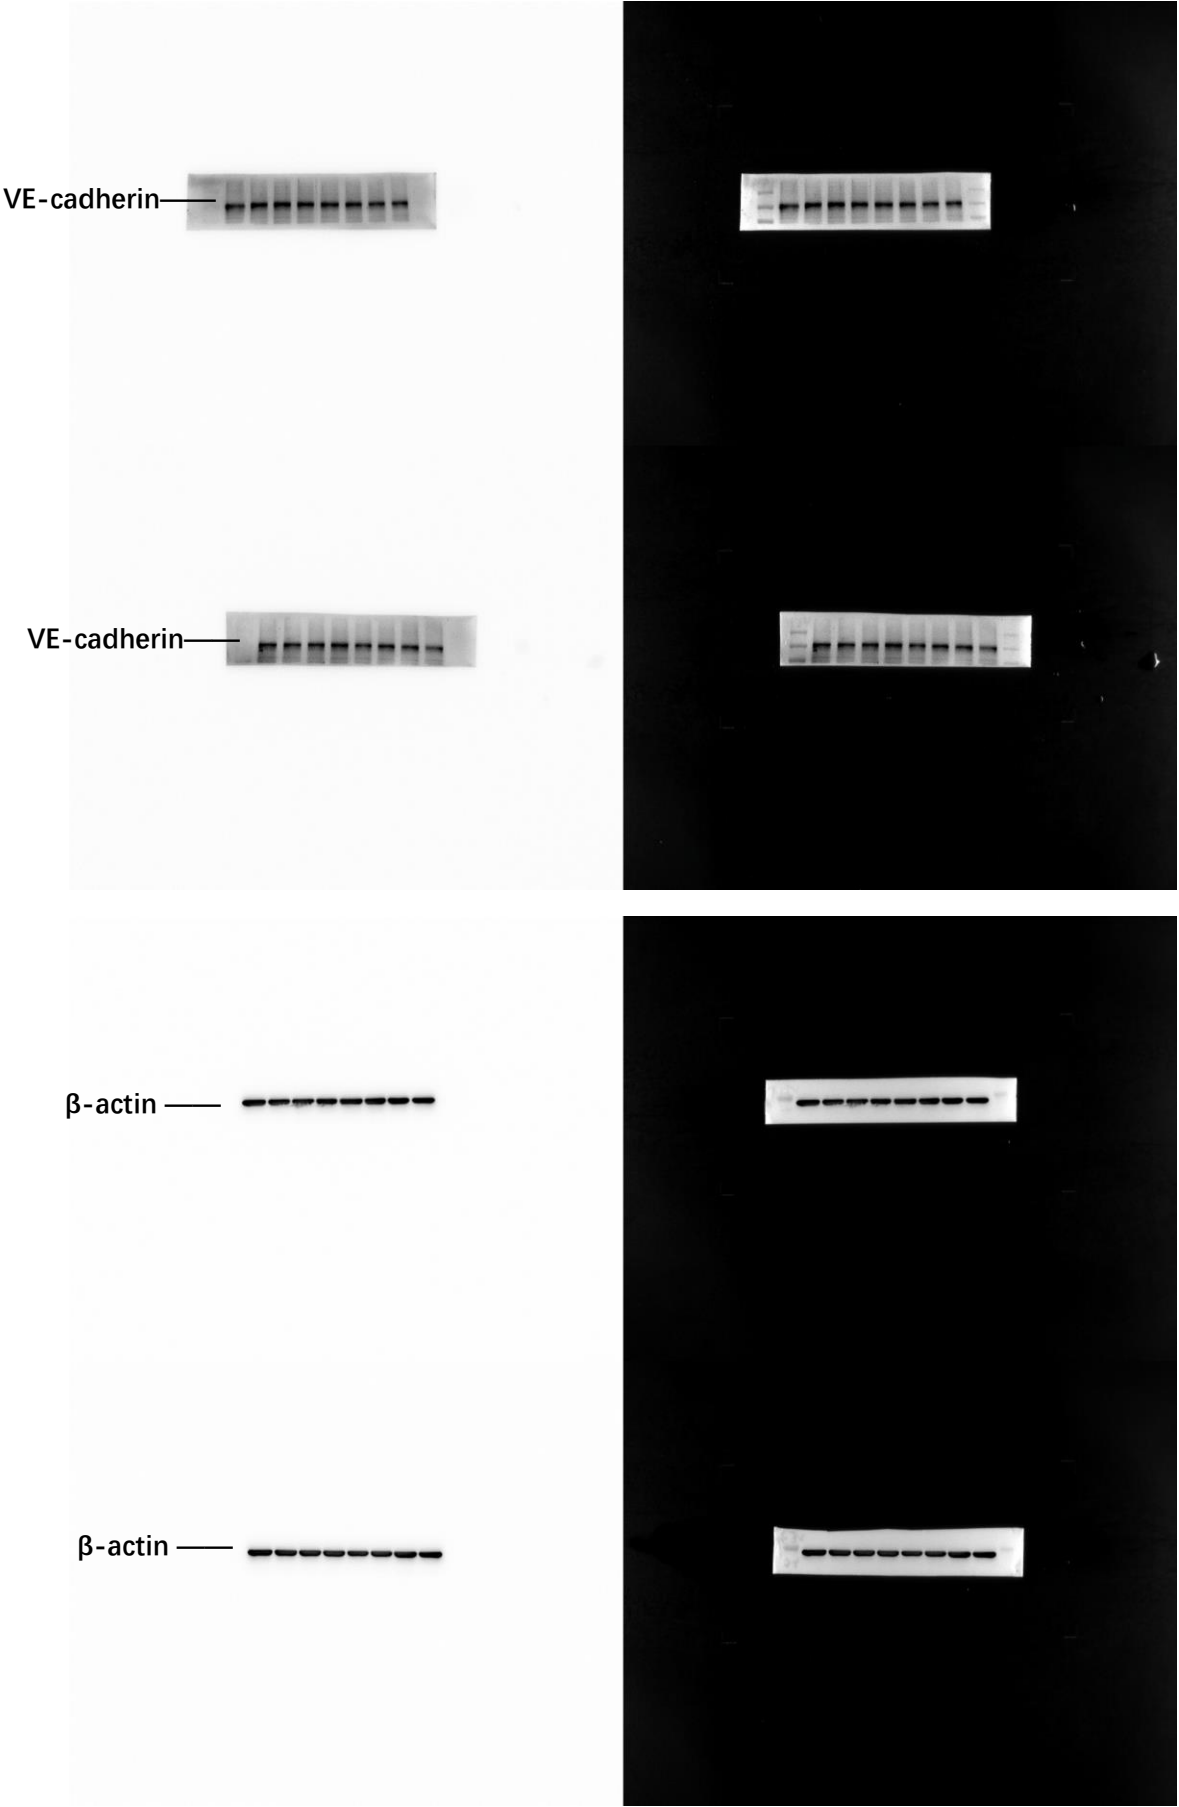

Figure 2H-Claudin-5

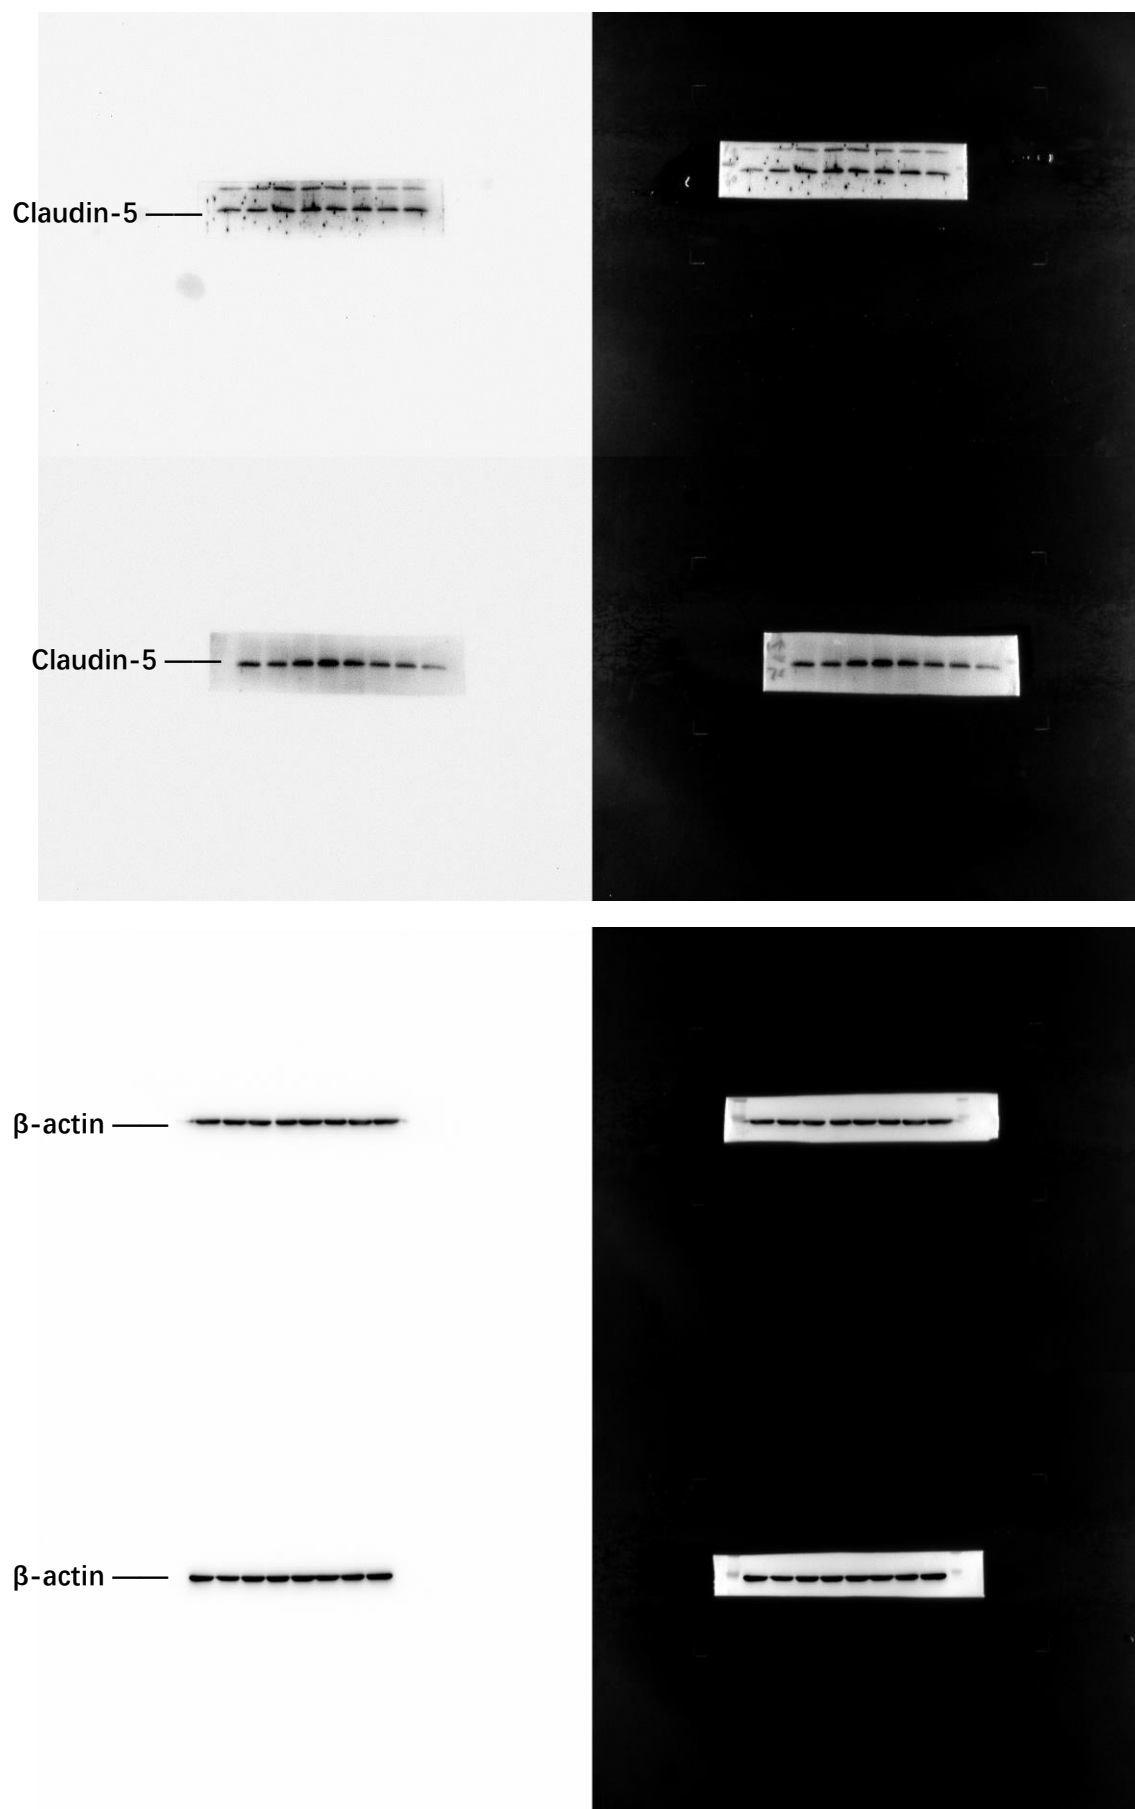

Figure 2H-VE-cadherin

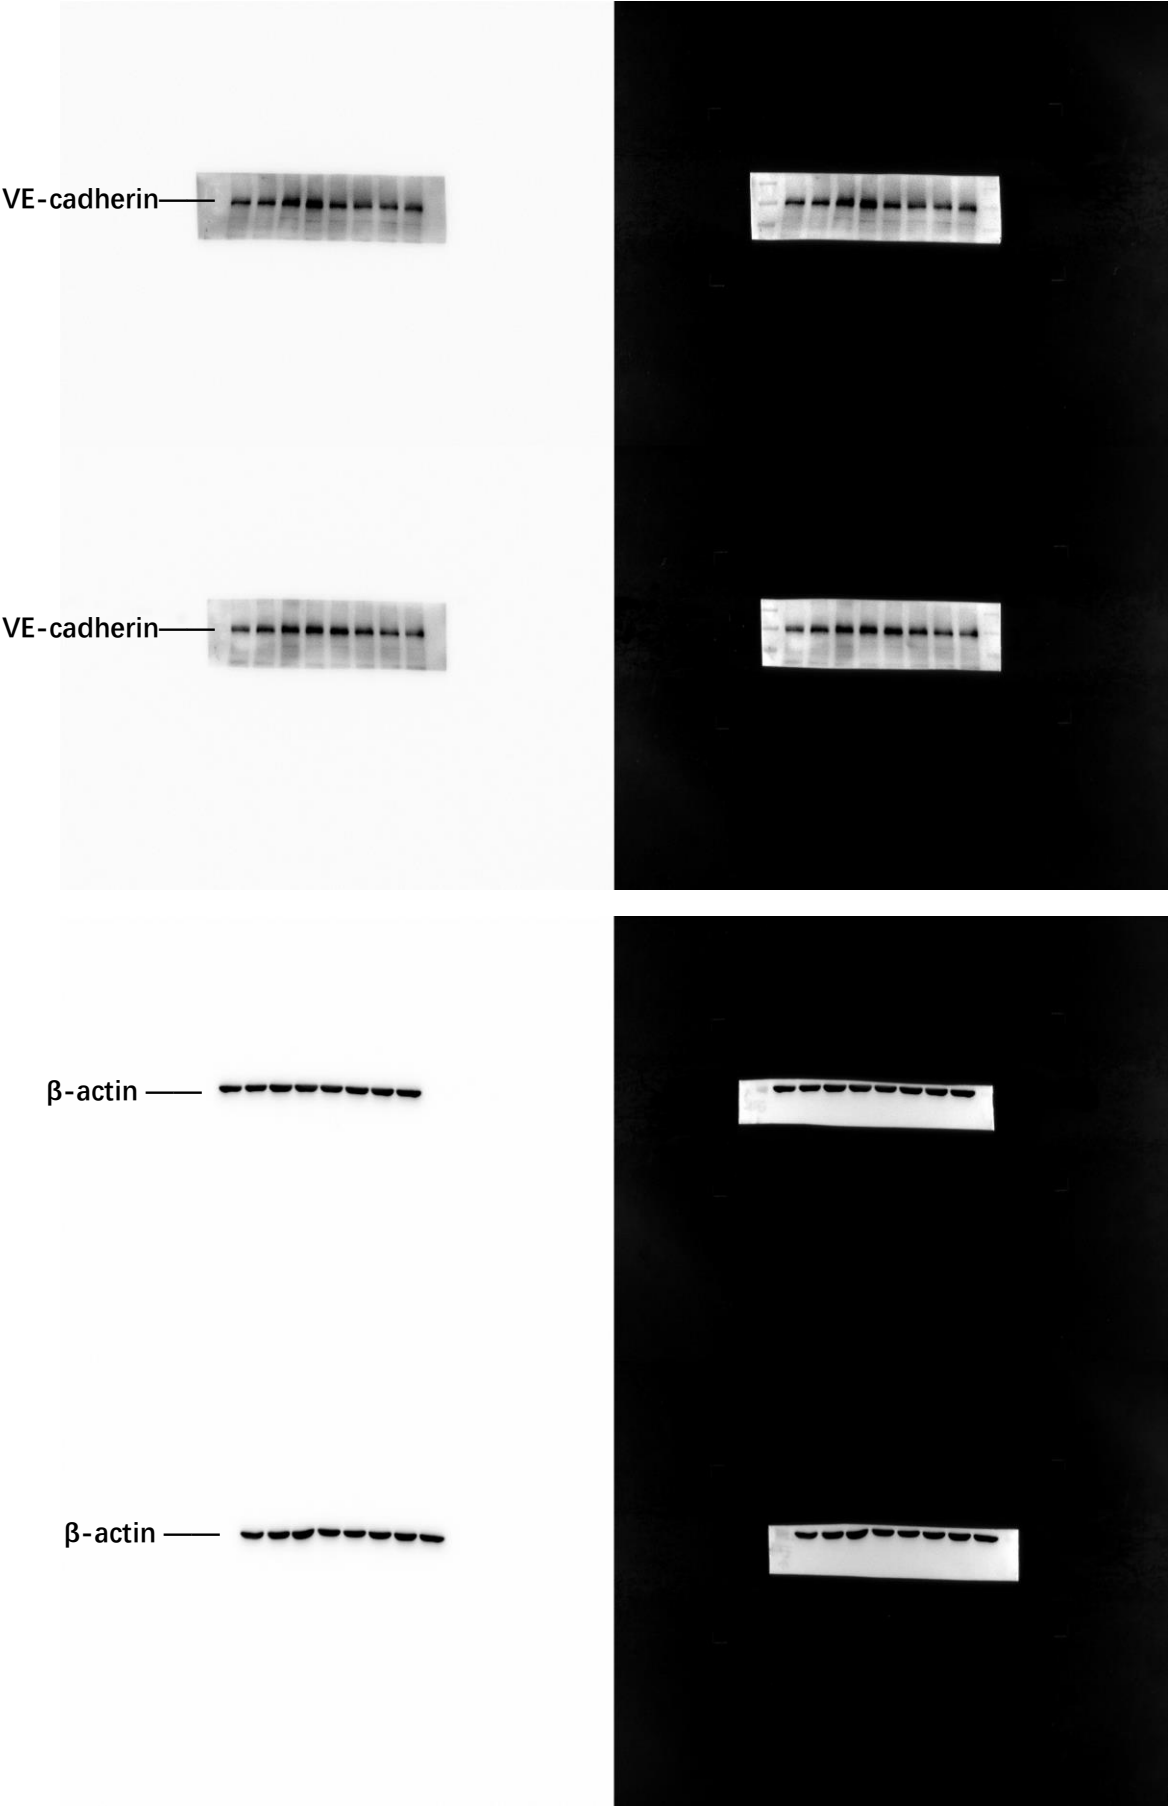

Figure 2I-Claudin-5

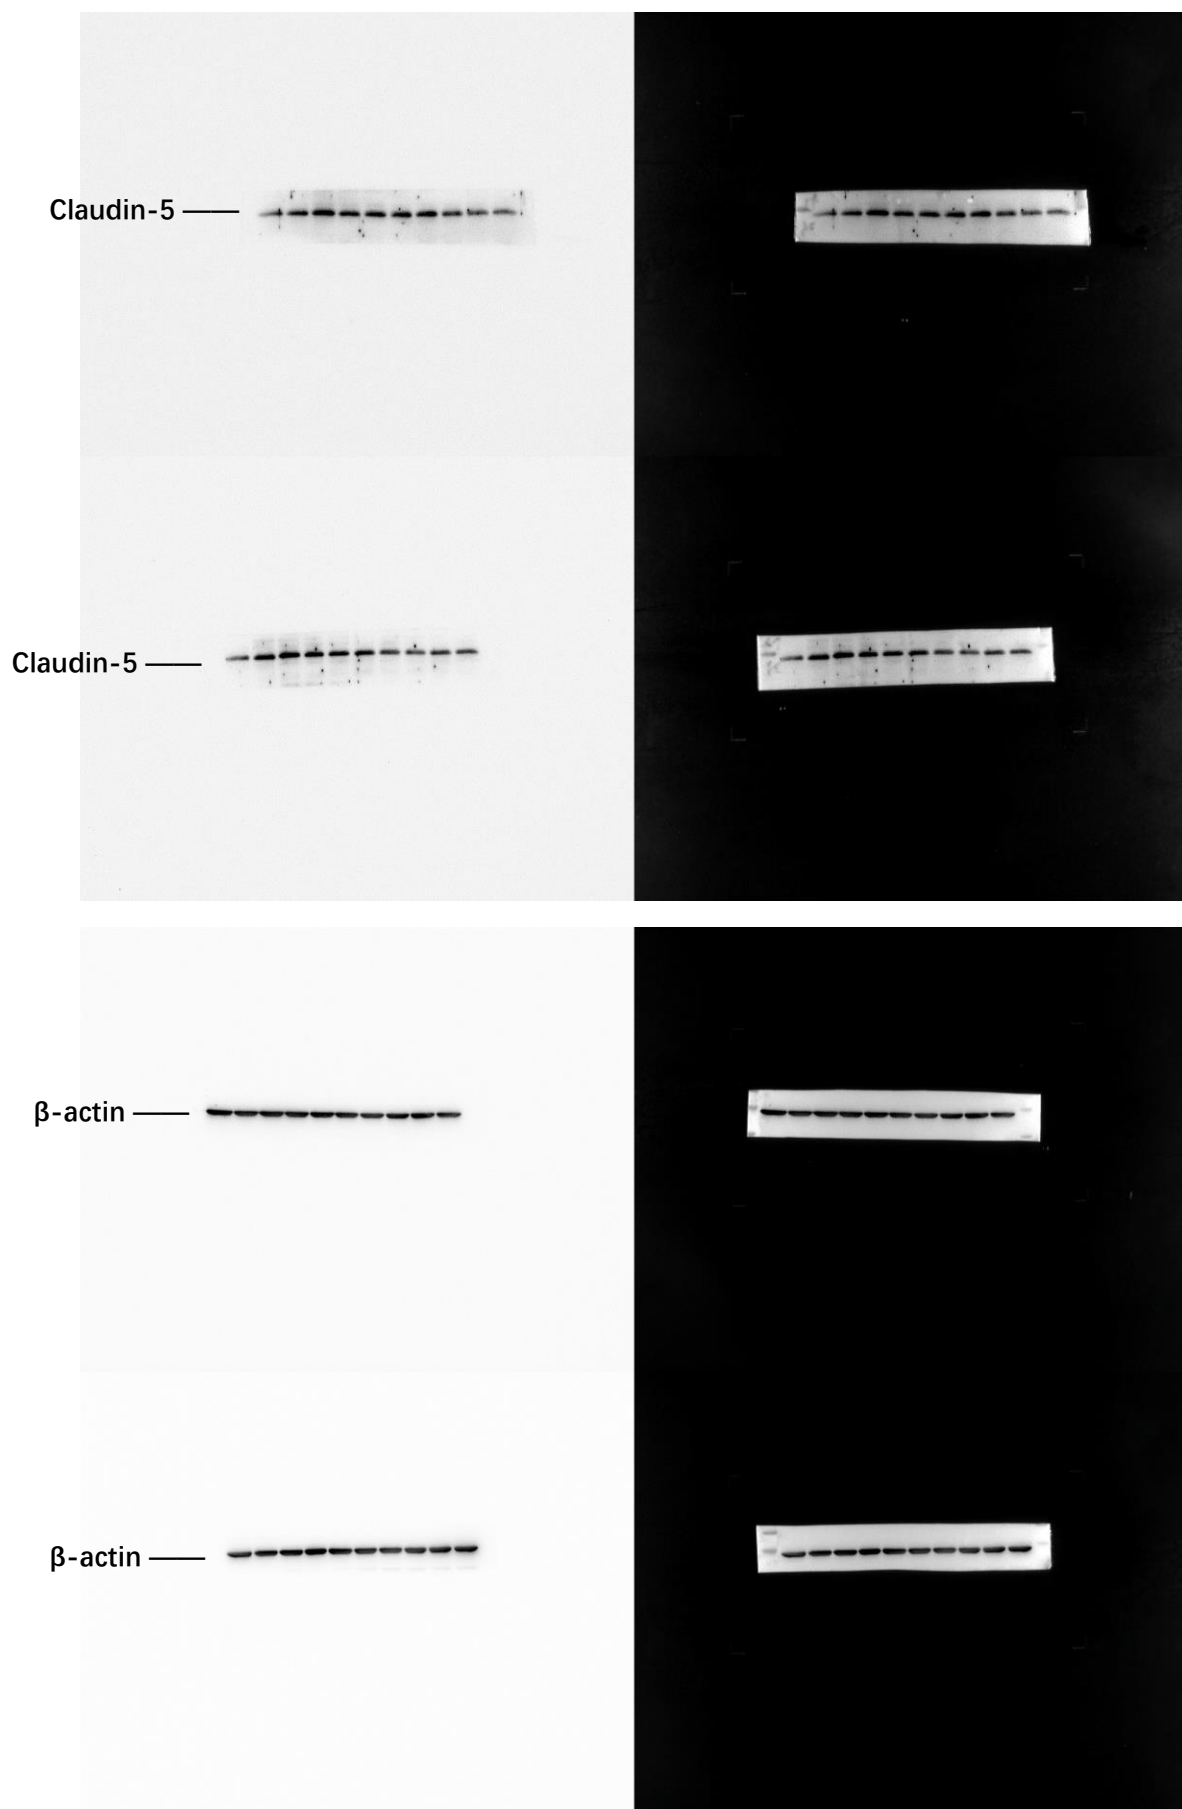

Figure 2I-VE-cadherin

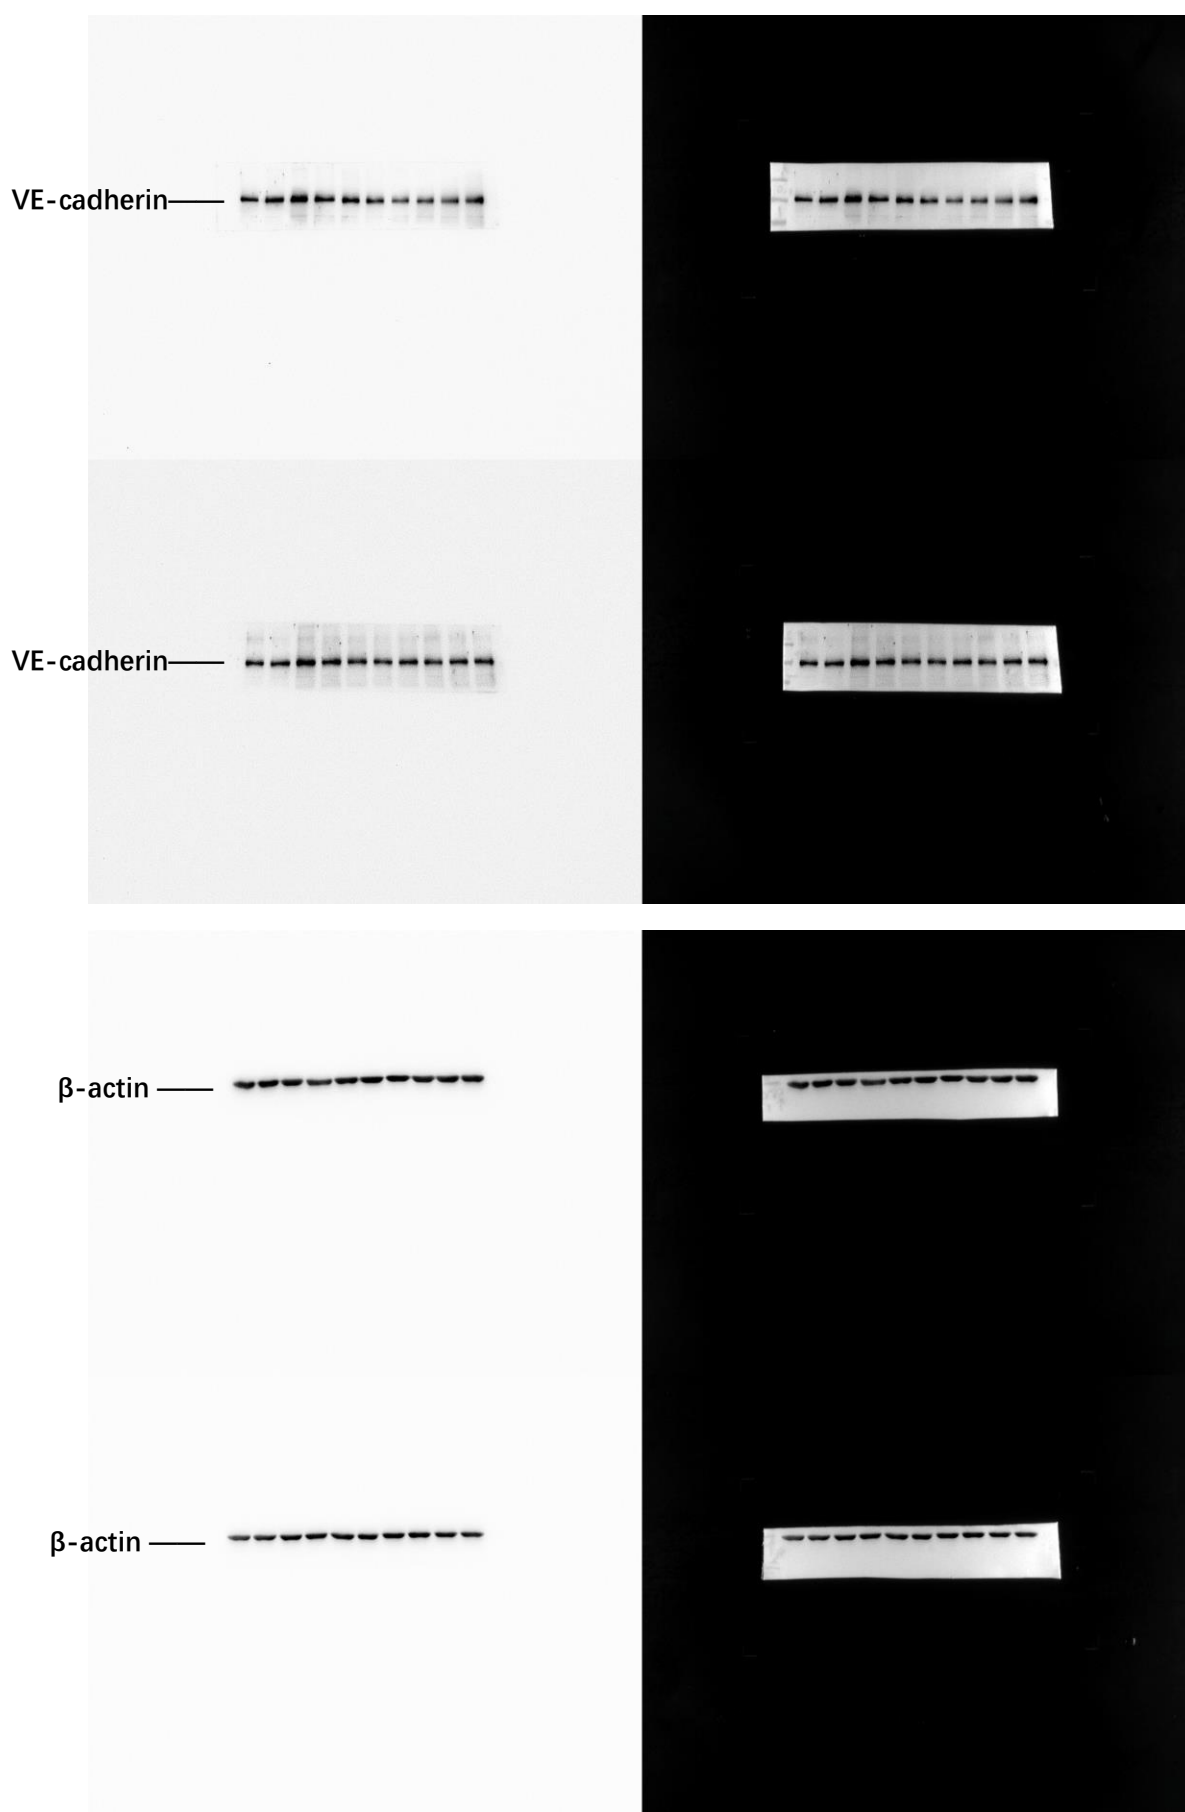

Figure 2J-Claudin-5

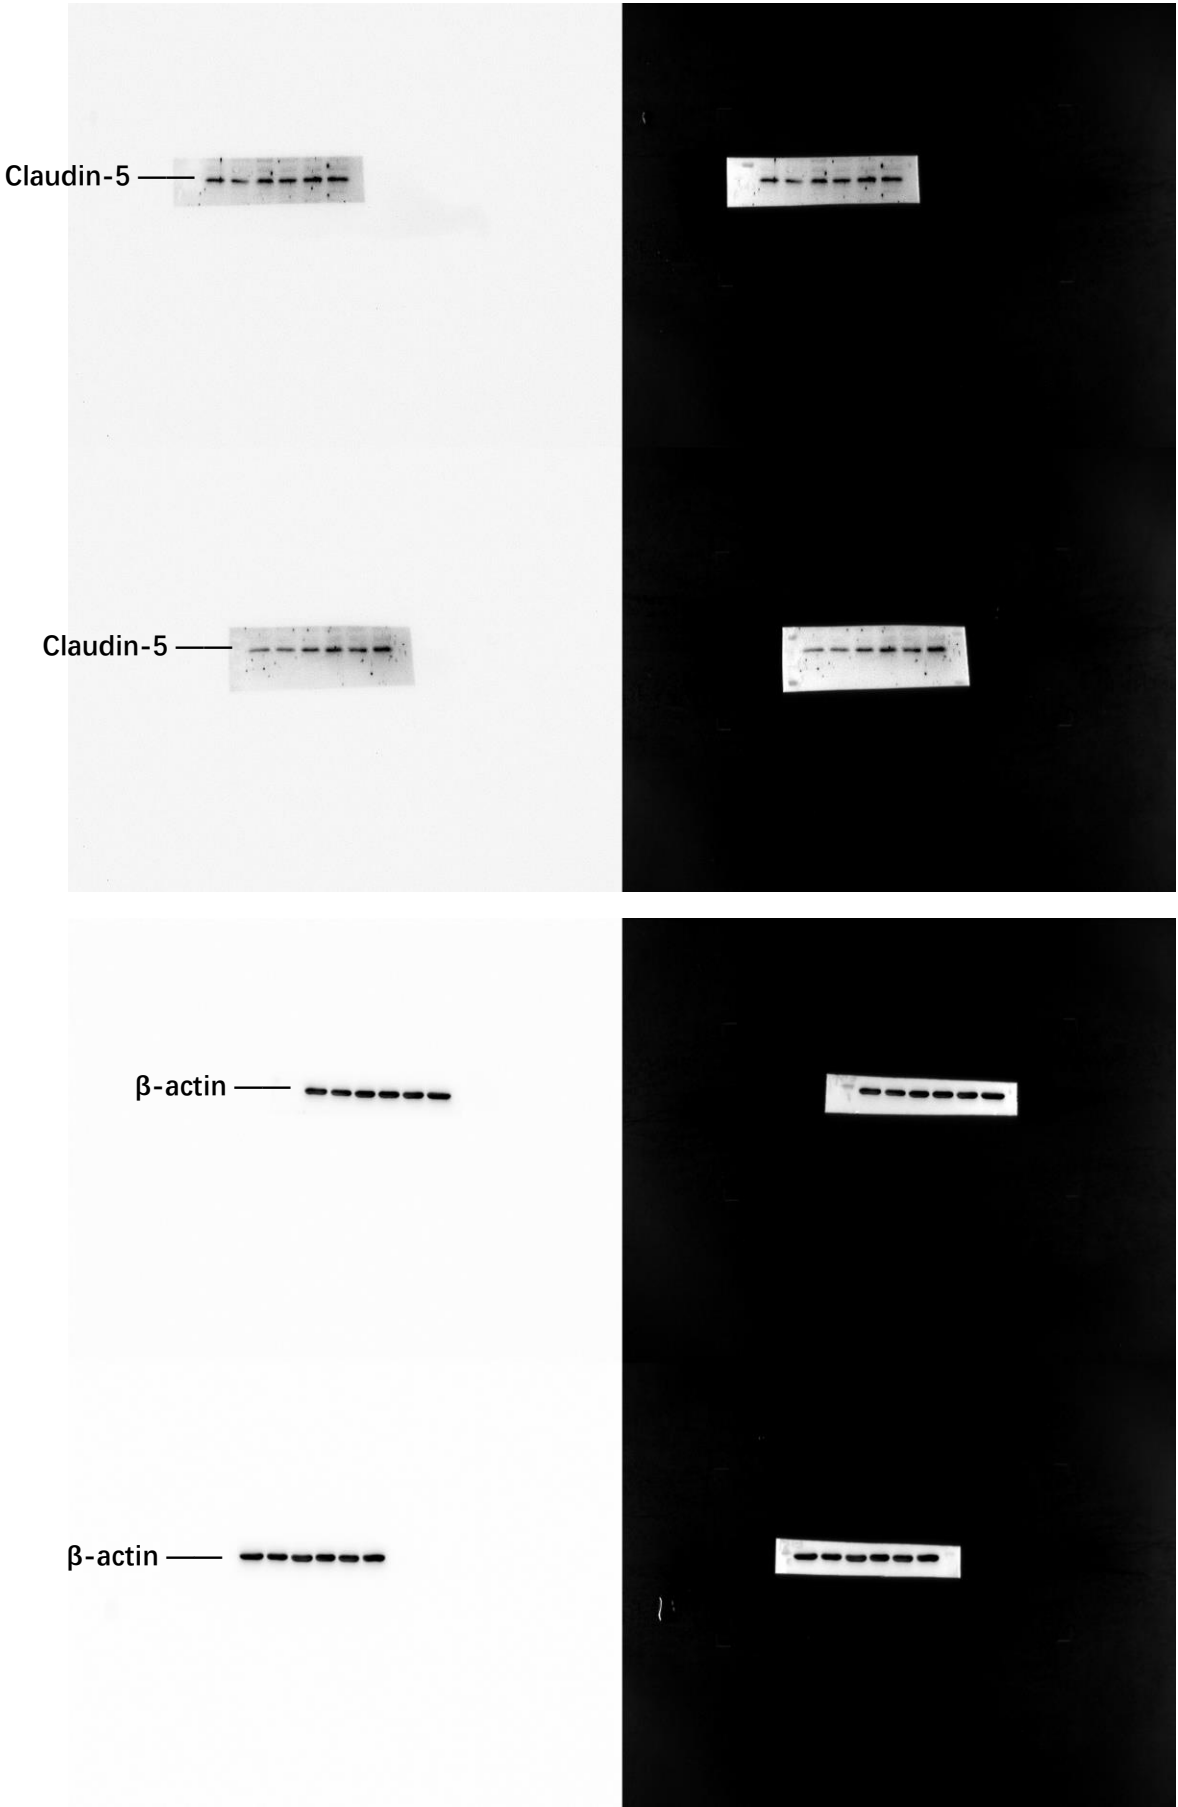

Figure 2J-VE-cadherin

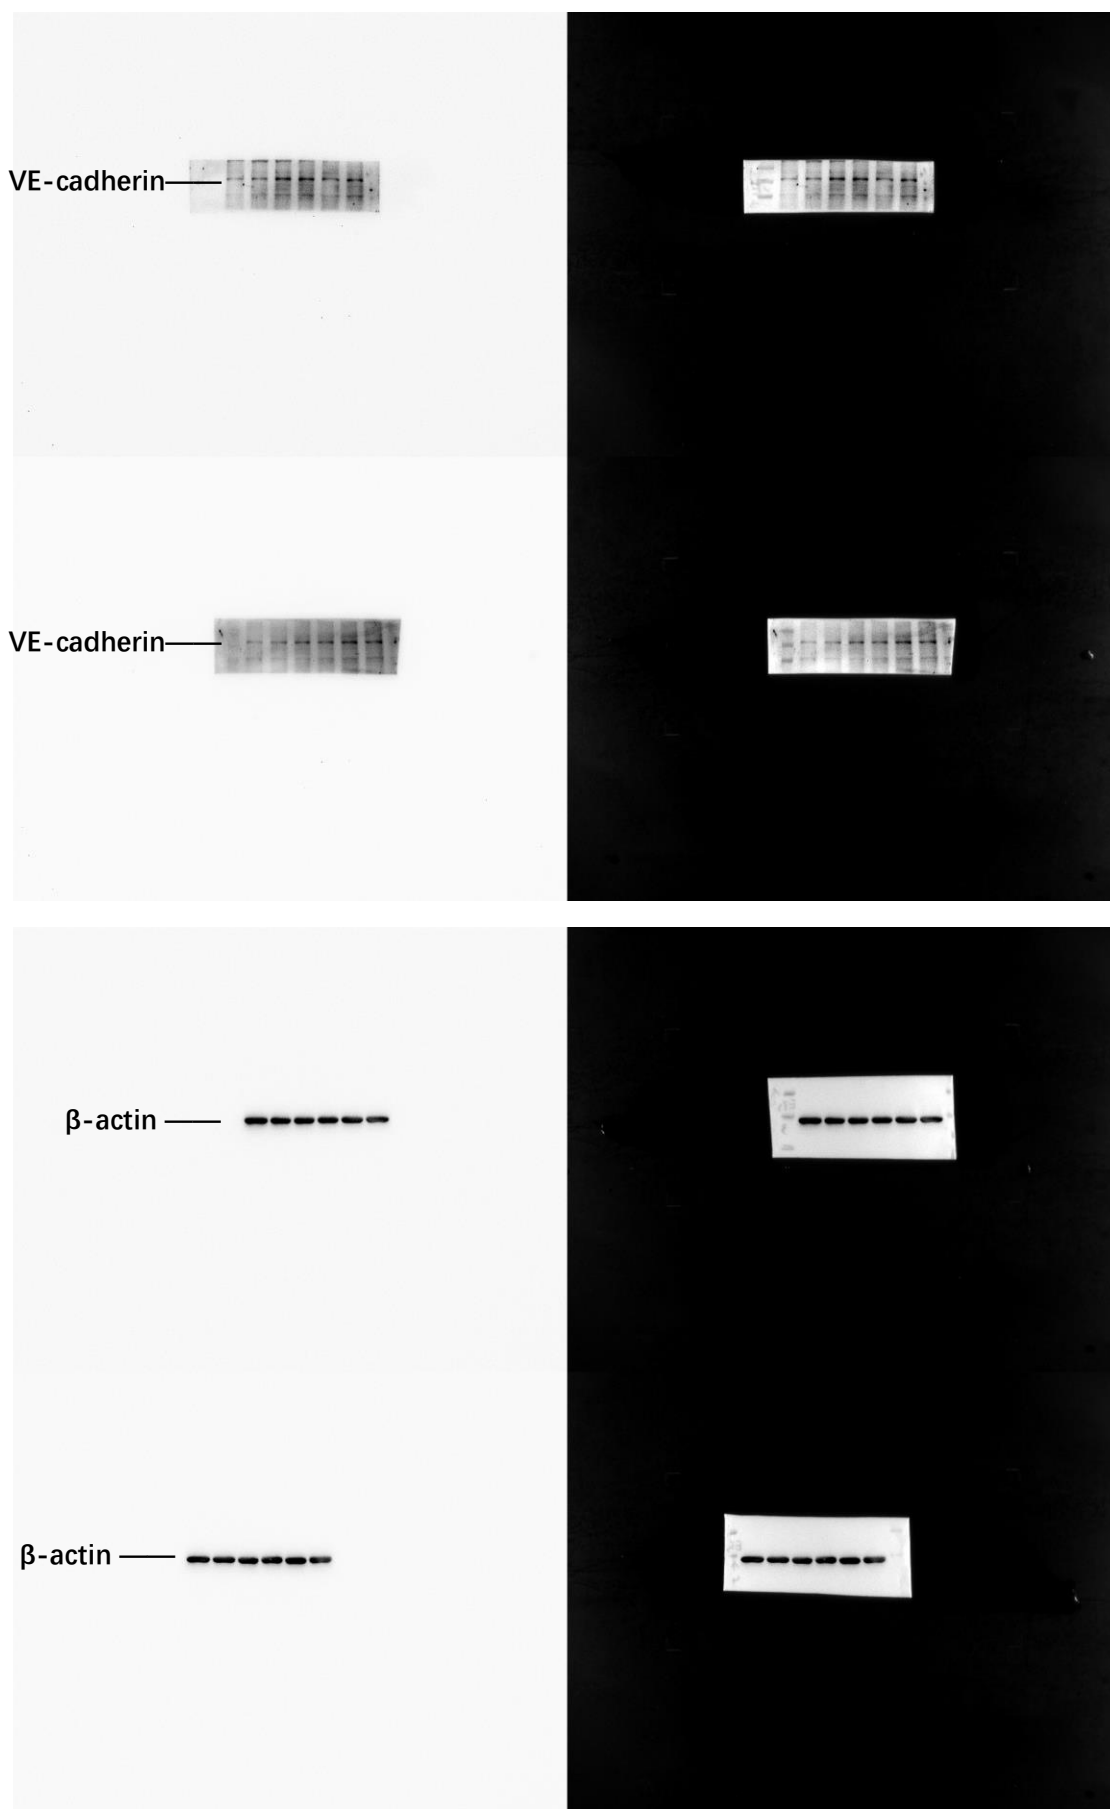



Claudin-5 —

Claudin-5 —

$\beta$ -actin —

$\beta$ -actin —

Figure 2K-VE-cadherin

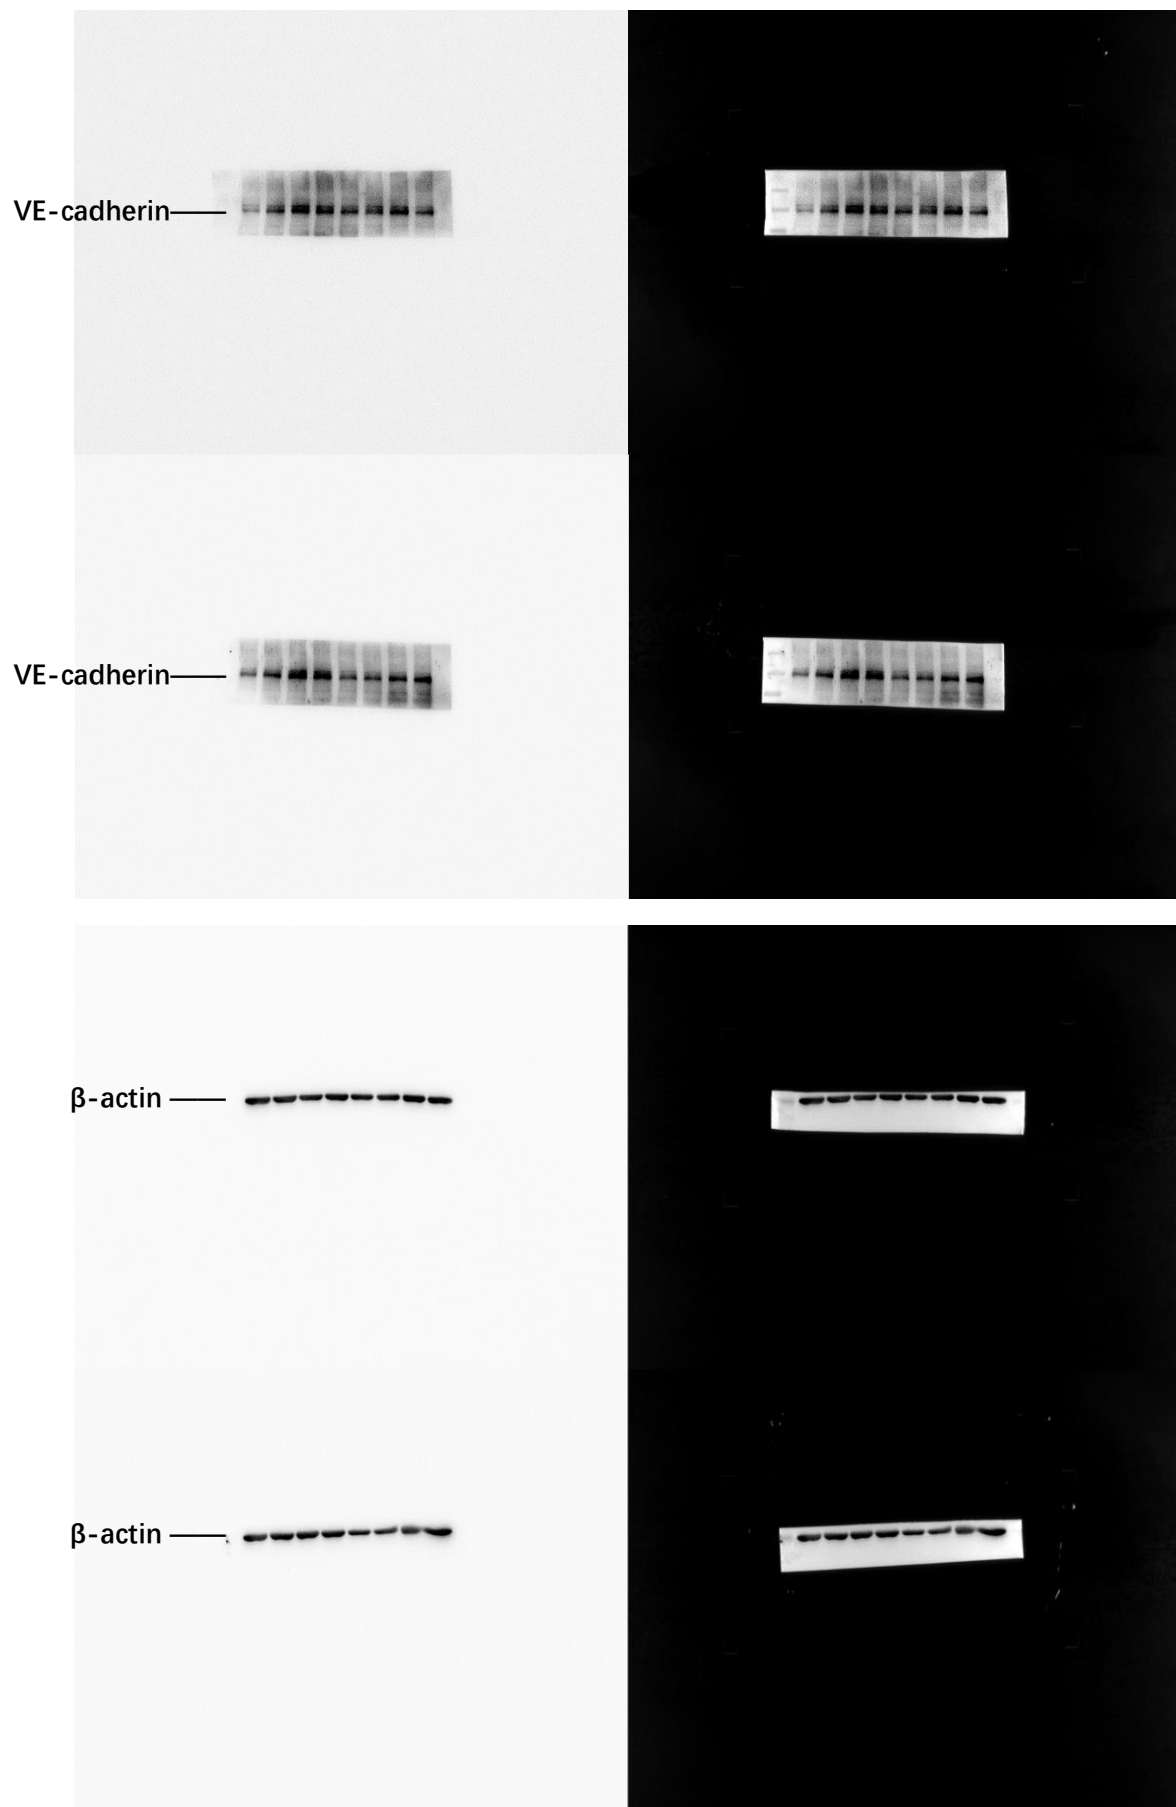

Figure 2L-Claudin-5

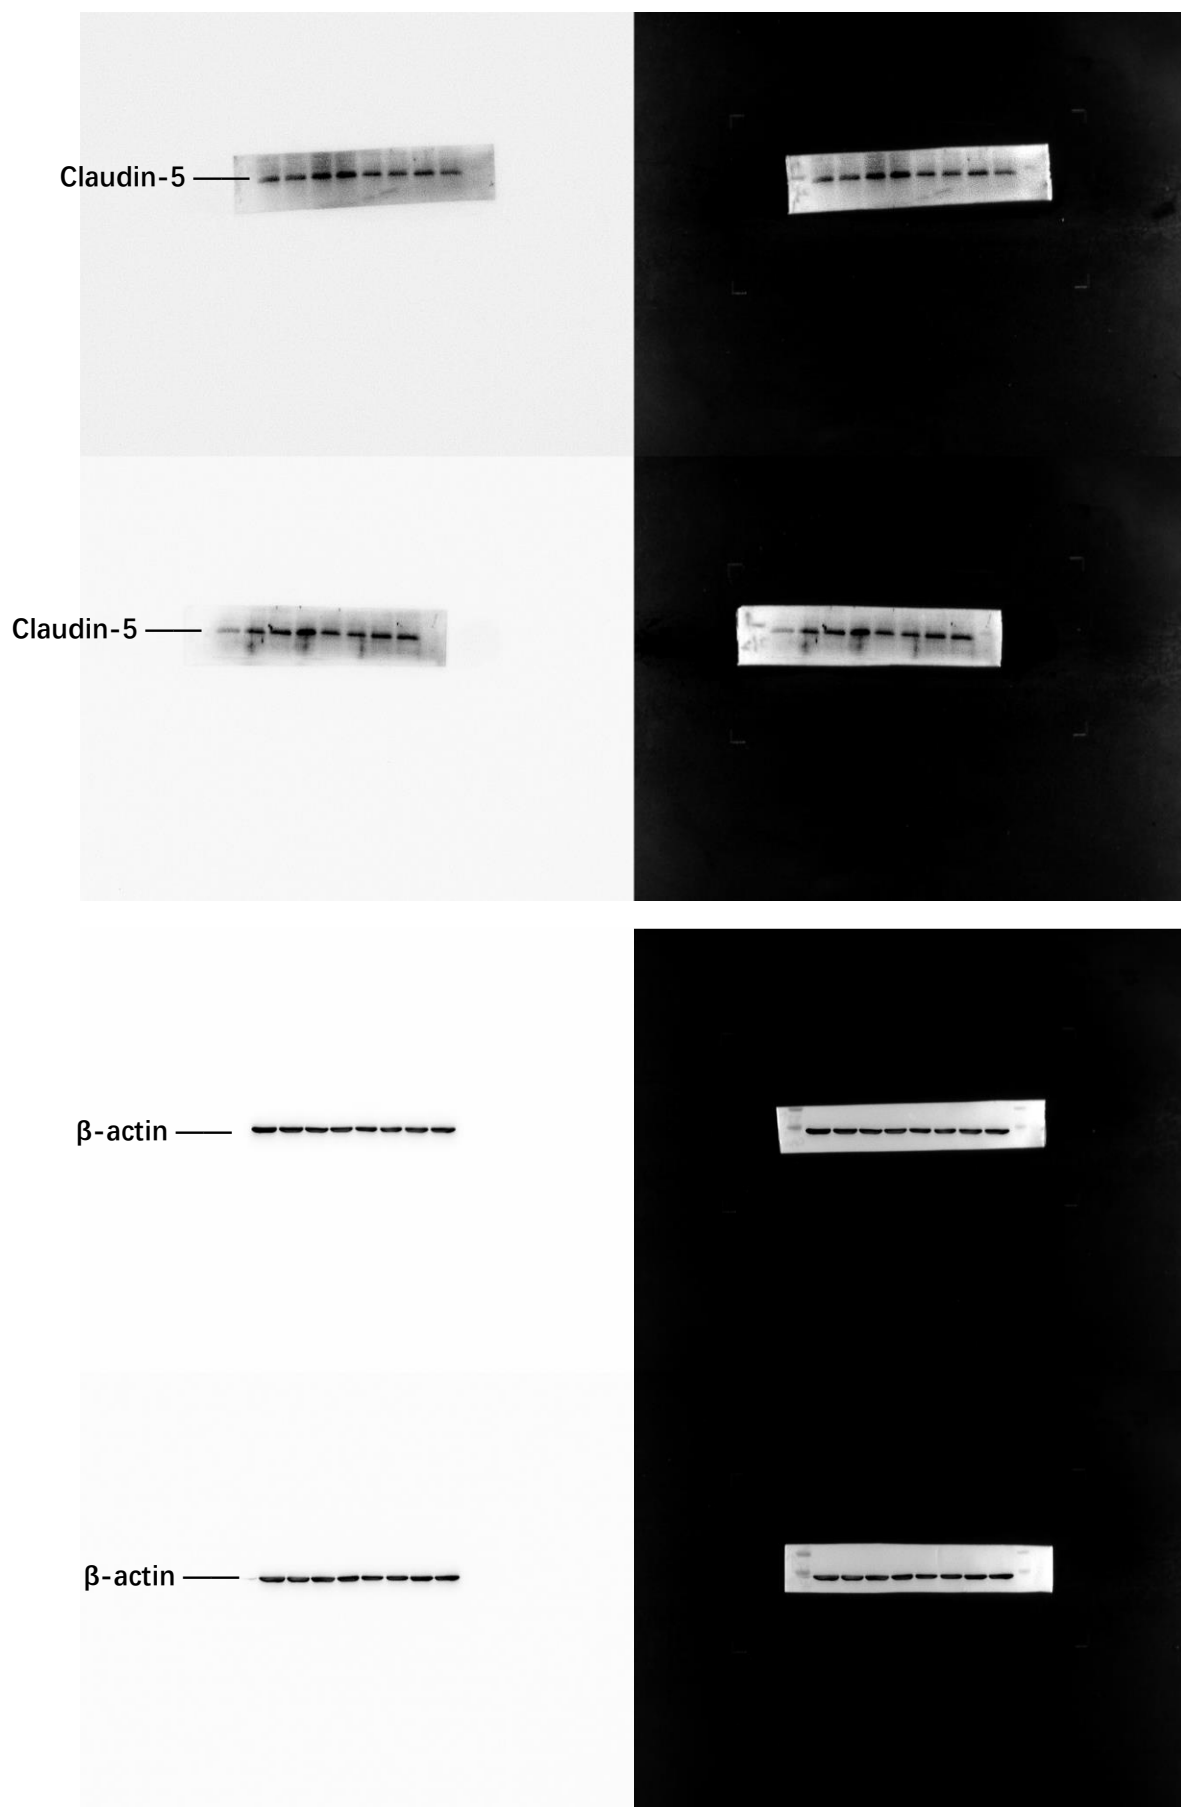

Figure 2L-VE-cadherin

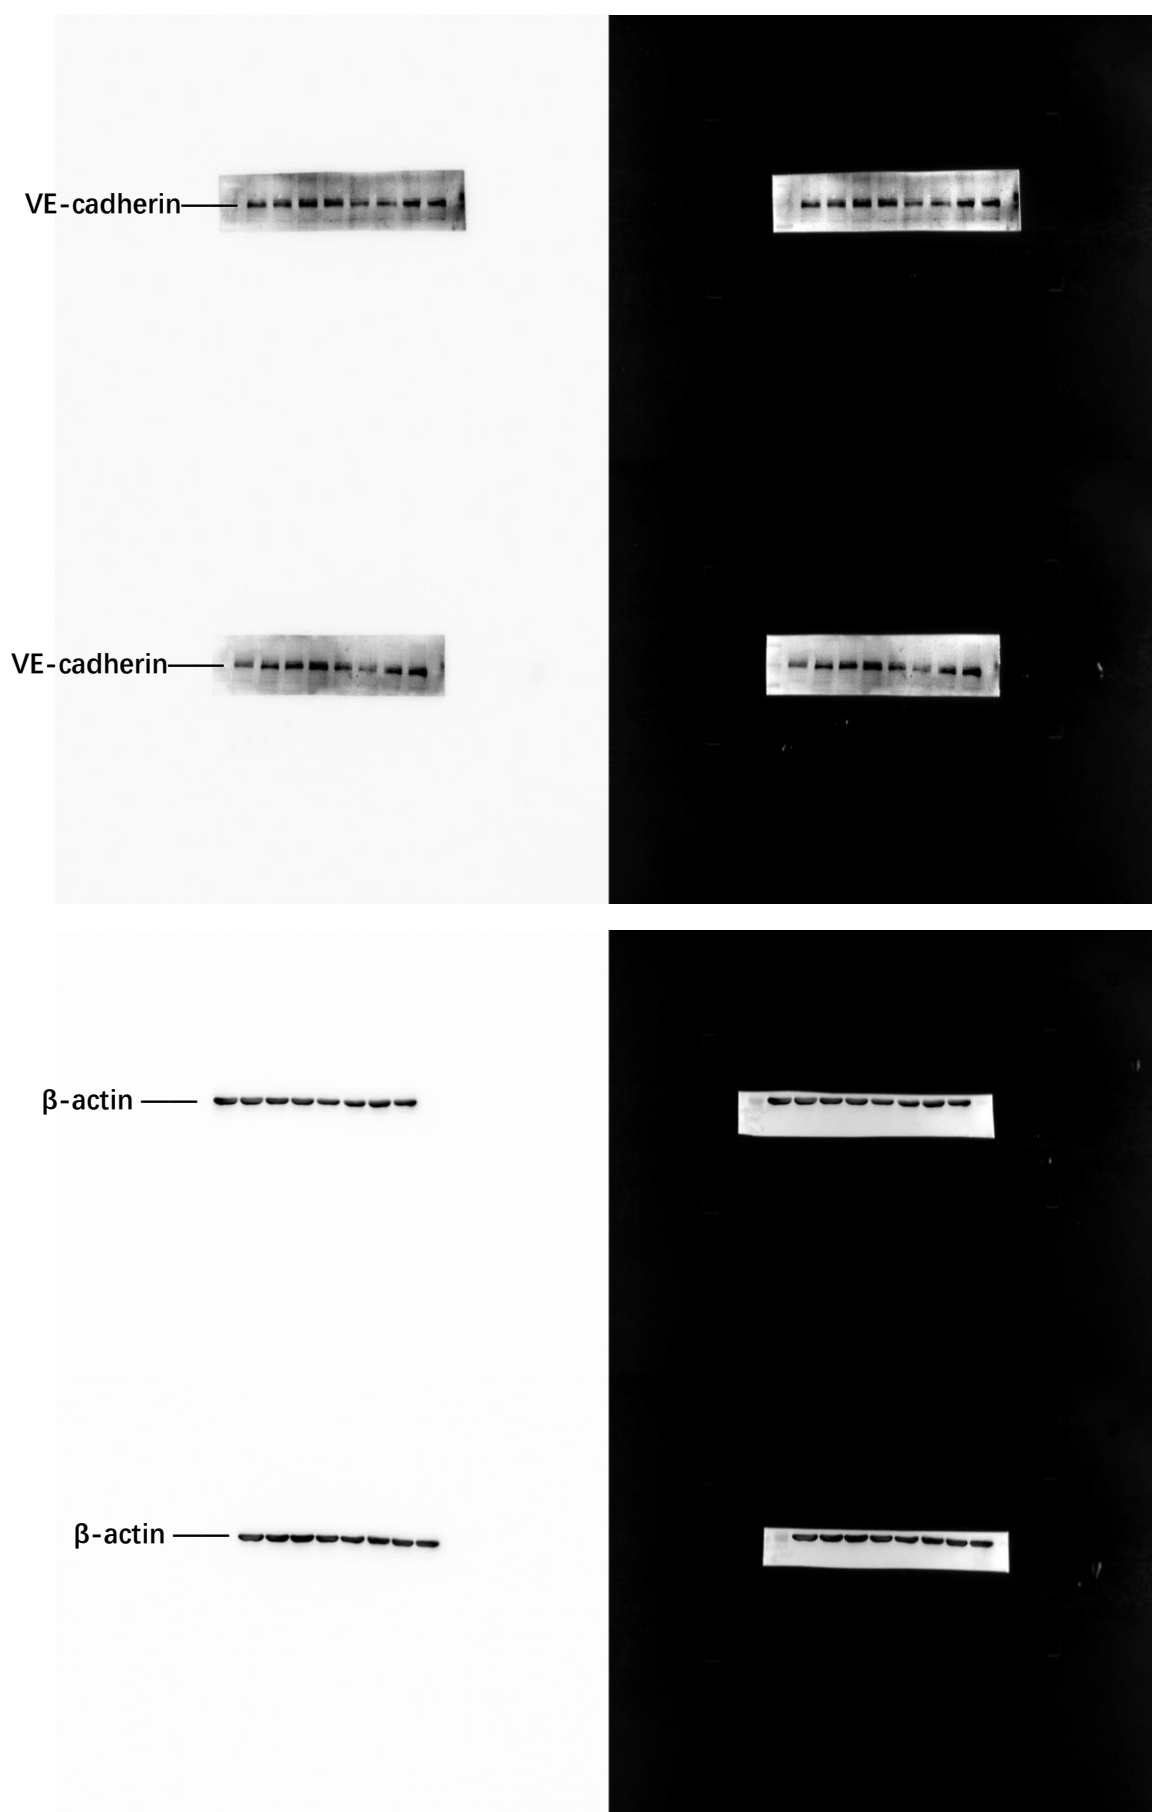

Supplement: fig2-data2 [file elife-96161-fig2-data2-v1.zip]
