# Supplementary material for: Neurons enhance blood–brain barrier function via upregulating claudin-5 and VE-cadherin expression due to glial cell line-derived neurotrophic factor secretion
Source: eLife journal article supplement (doi:10.7554/elife.96161), 2024-05-29

Figure 3A-Claudin-5

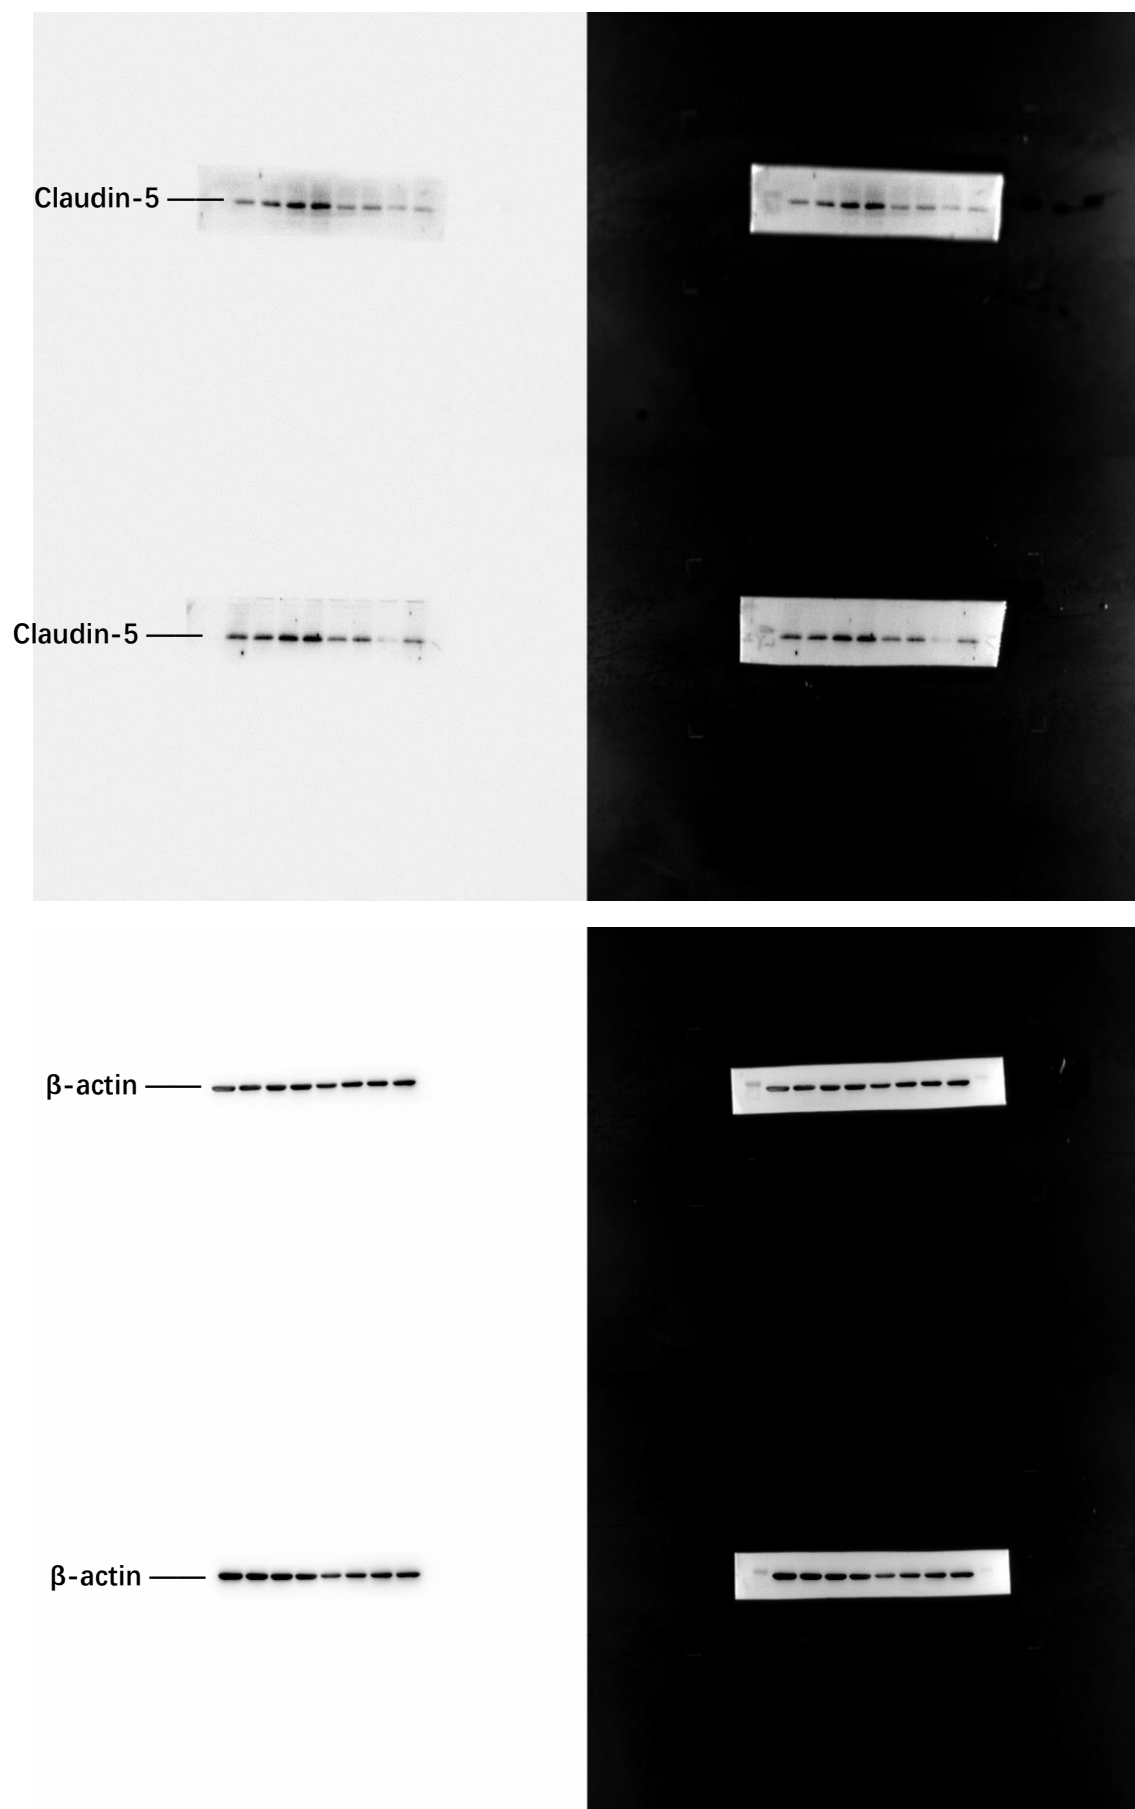

Figure 3A-VE-cadherin

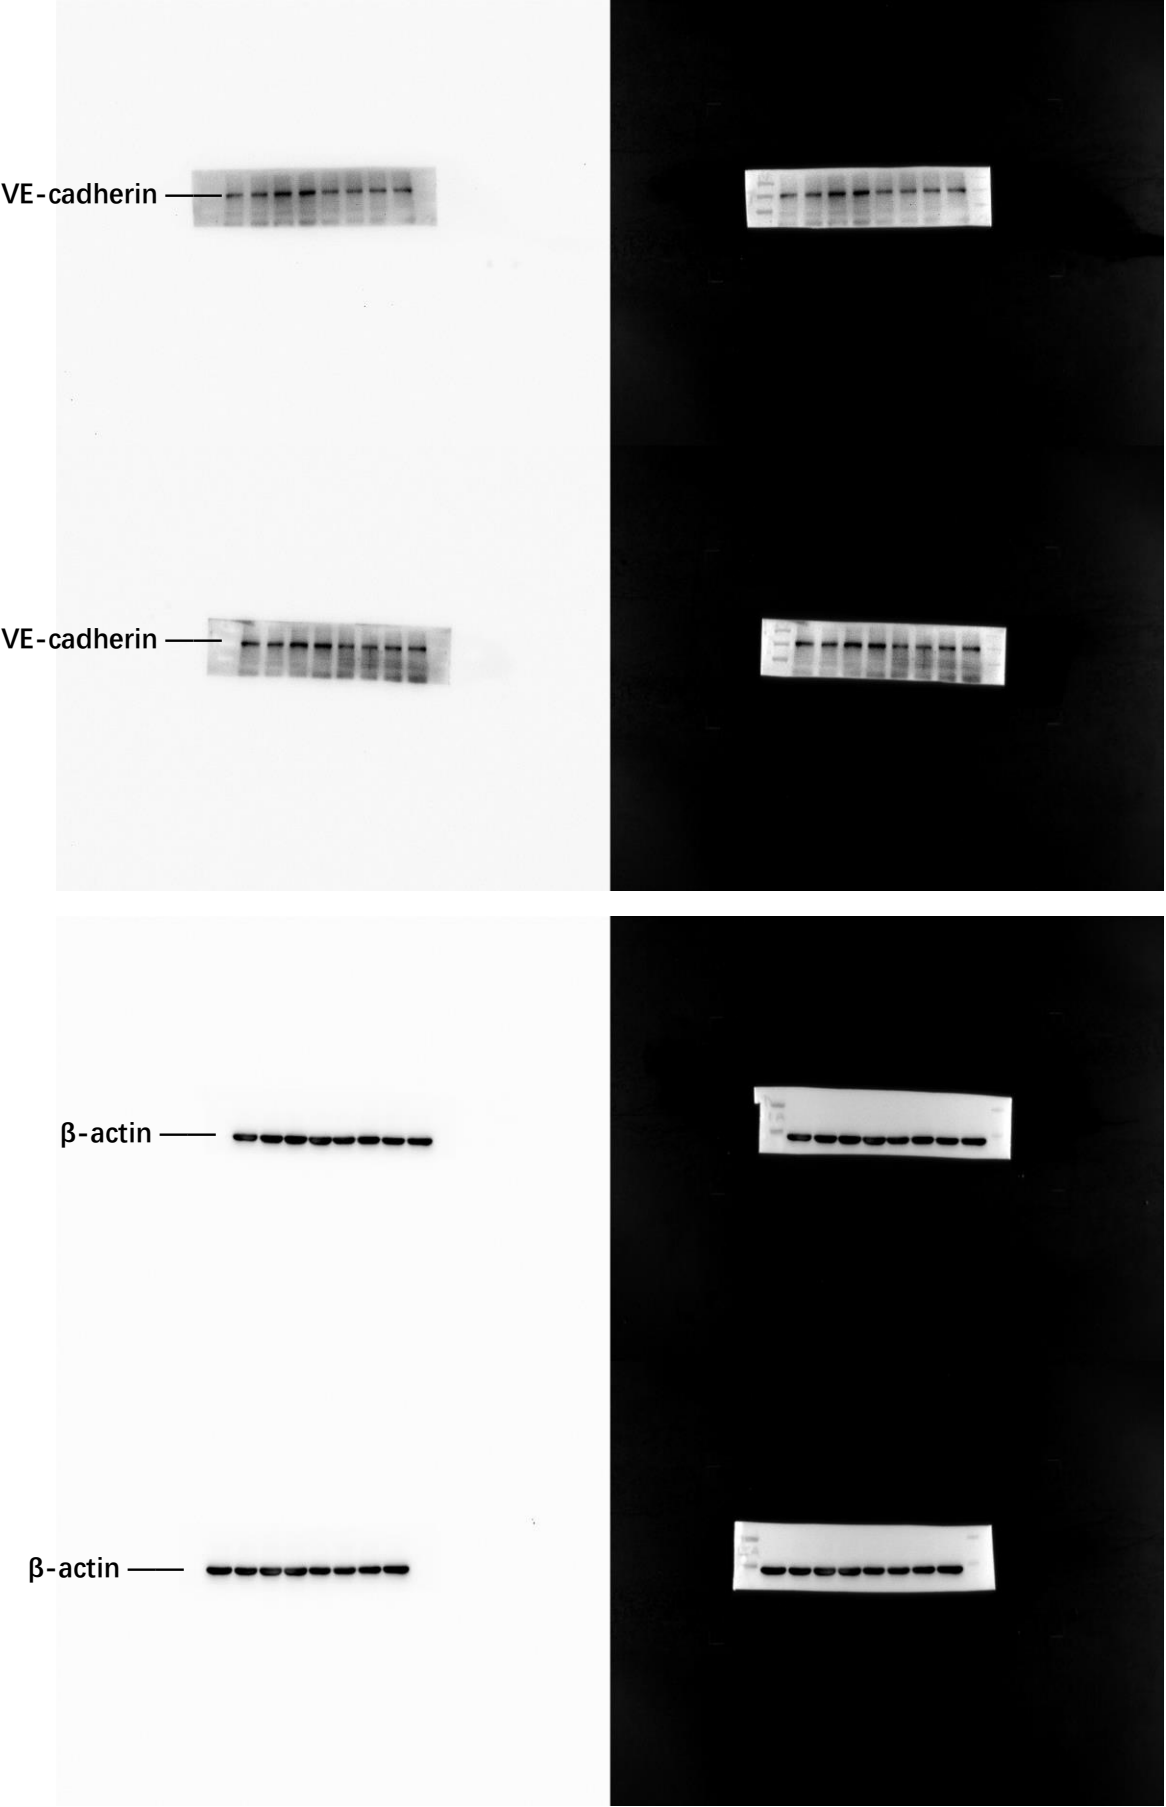

Figure 3A-pAKT/AKT

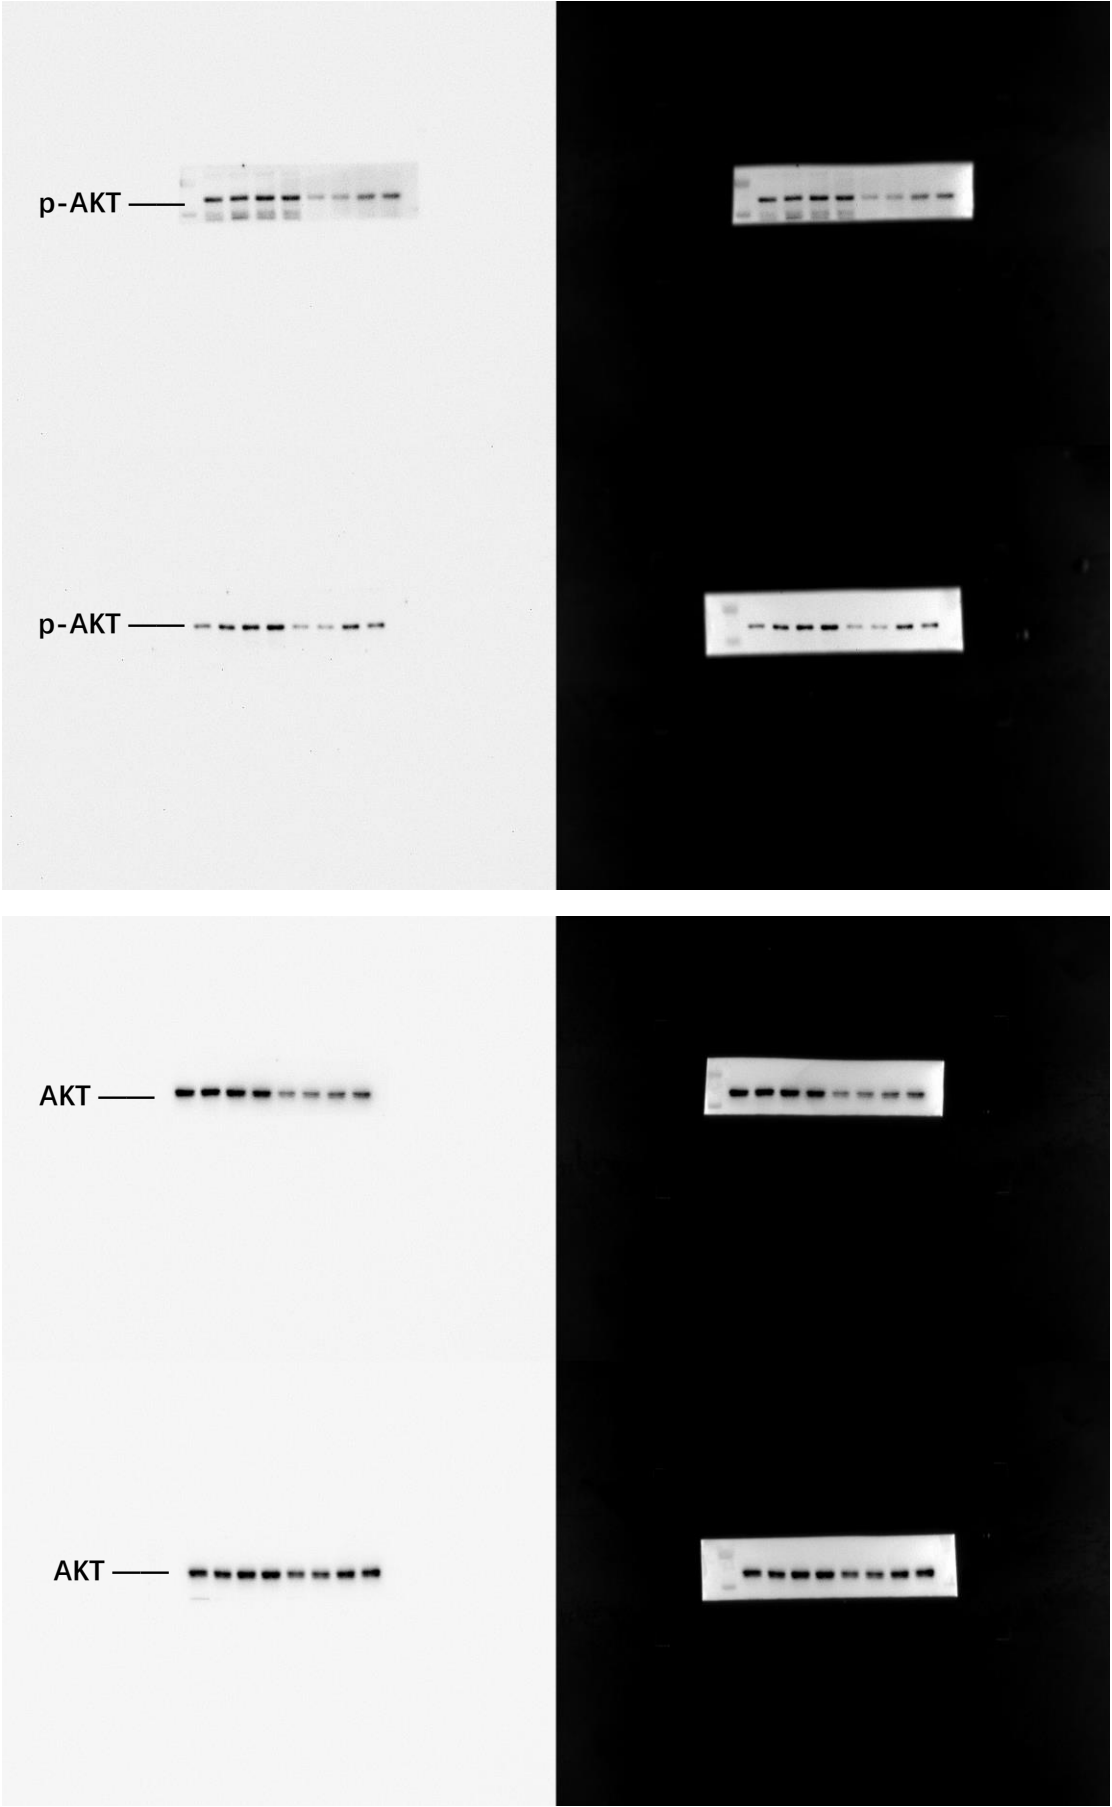

Figure 3B-claudin-5

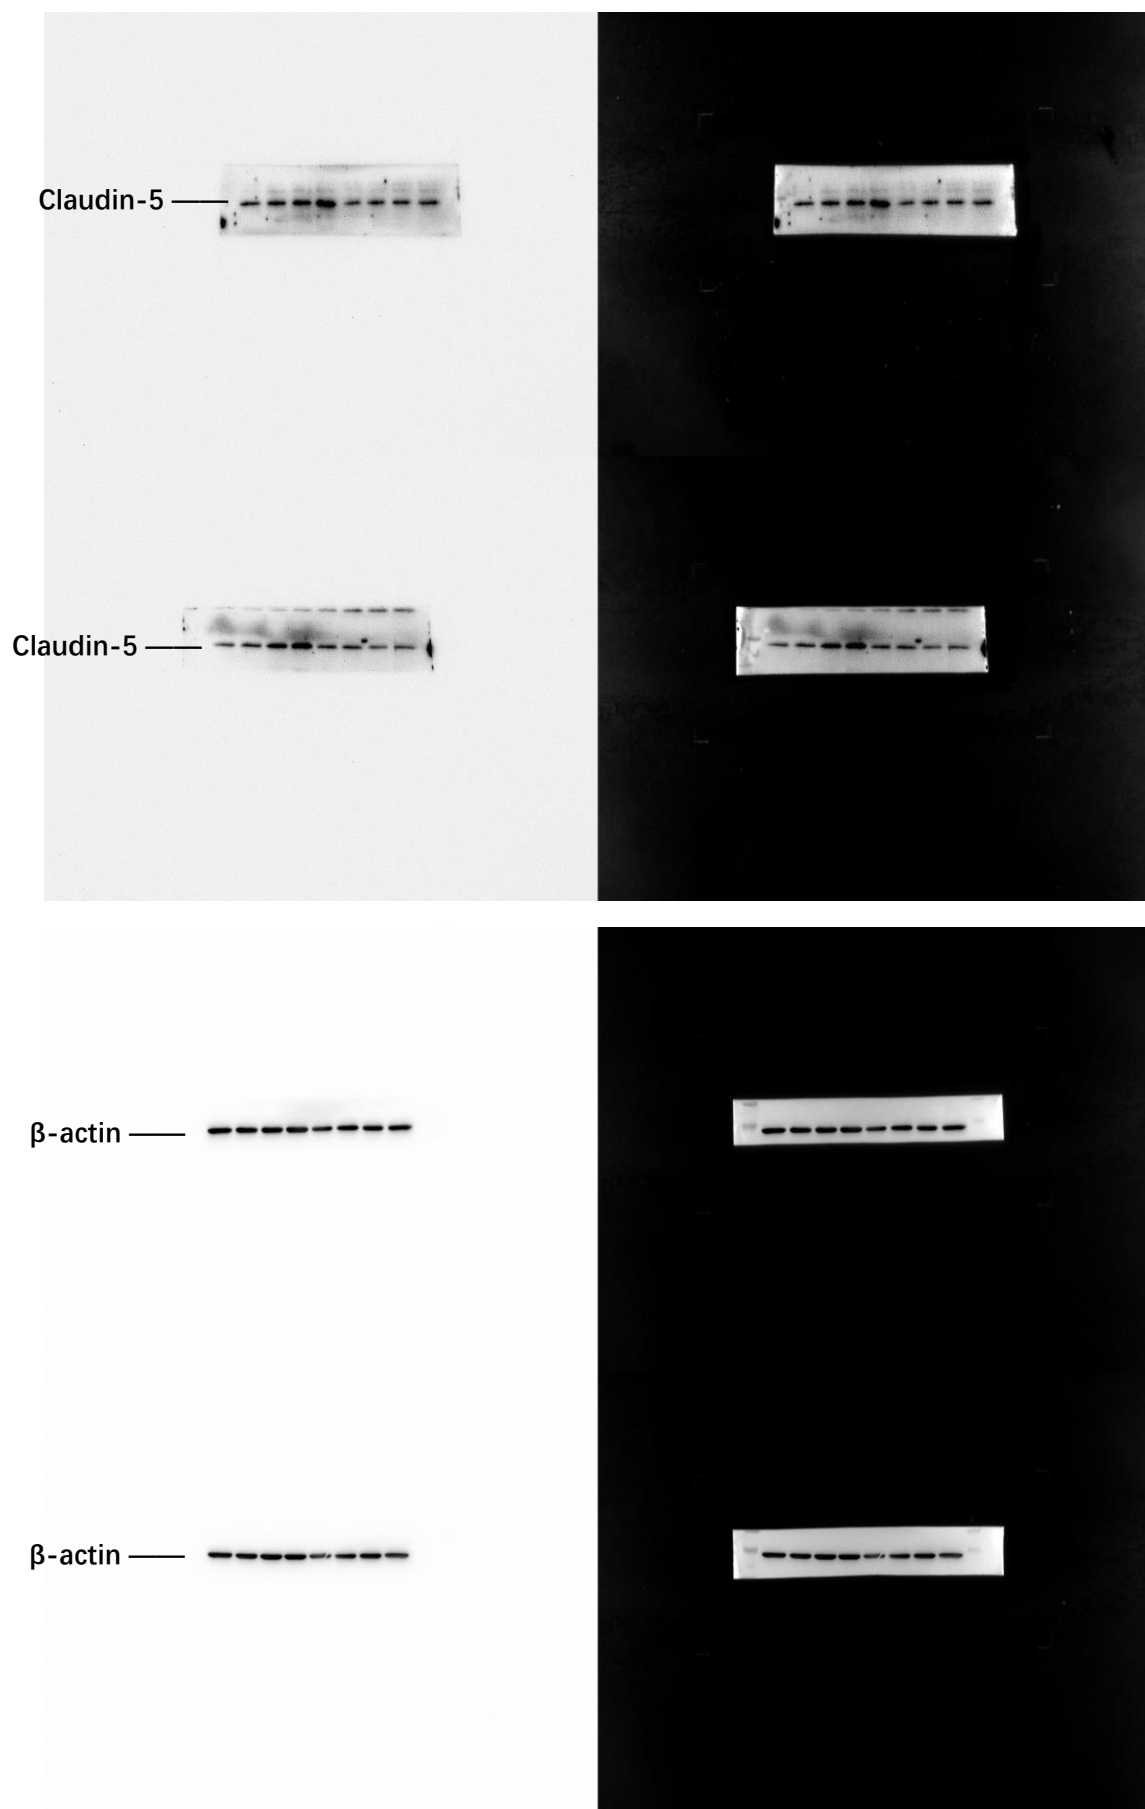

Figure 3B-VE-cadherin

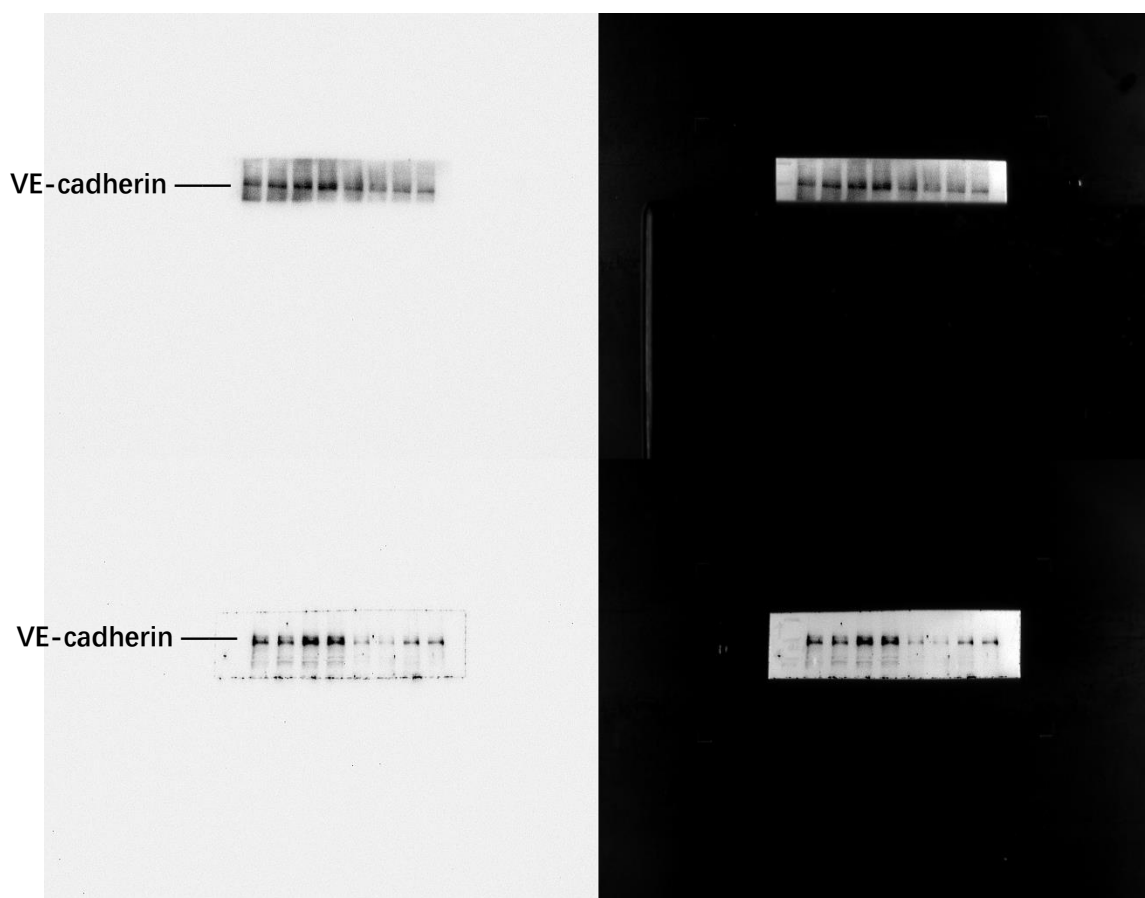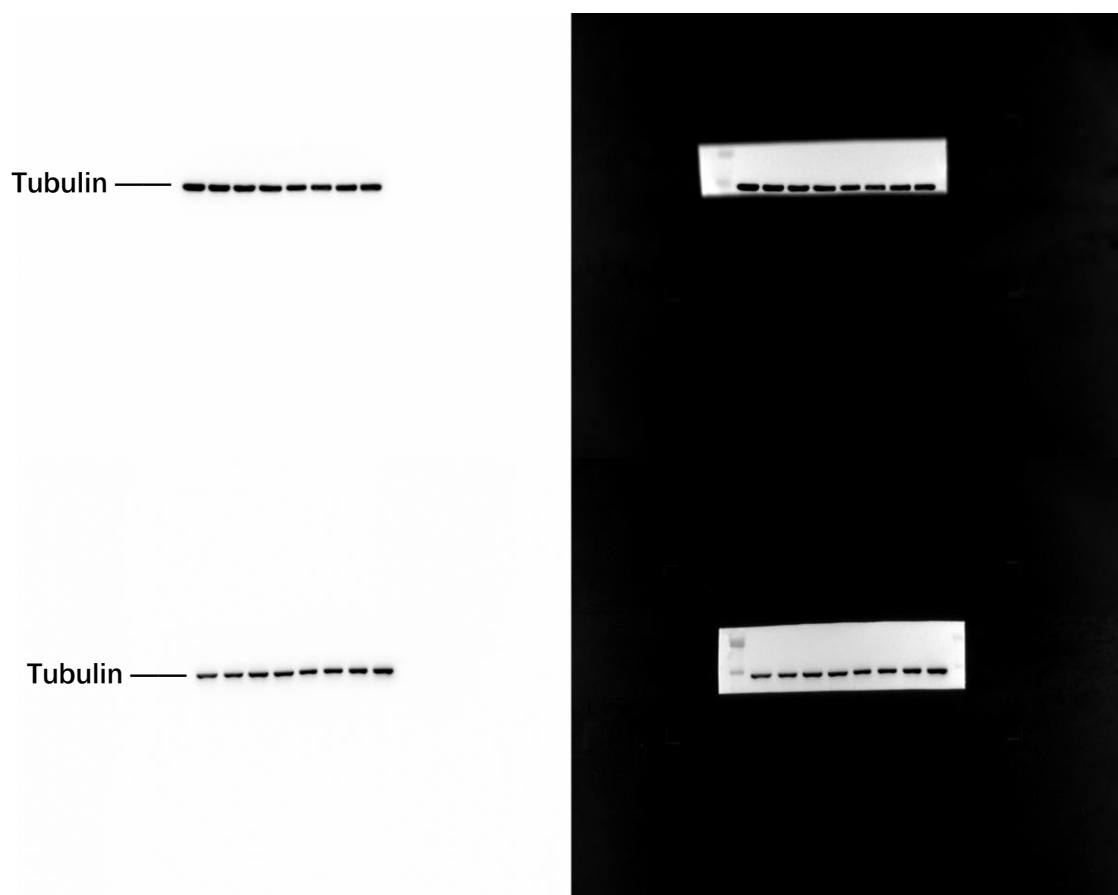

Figure 3B-p-ERK/ERK

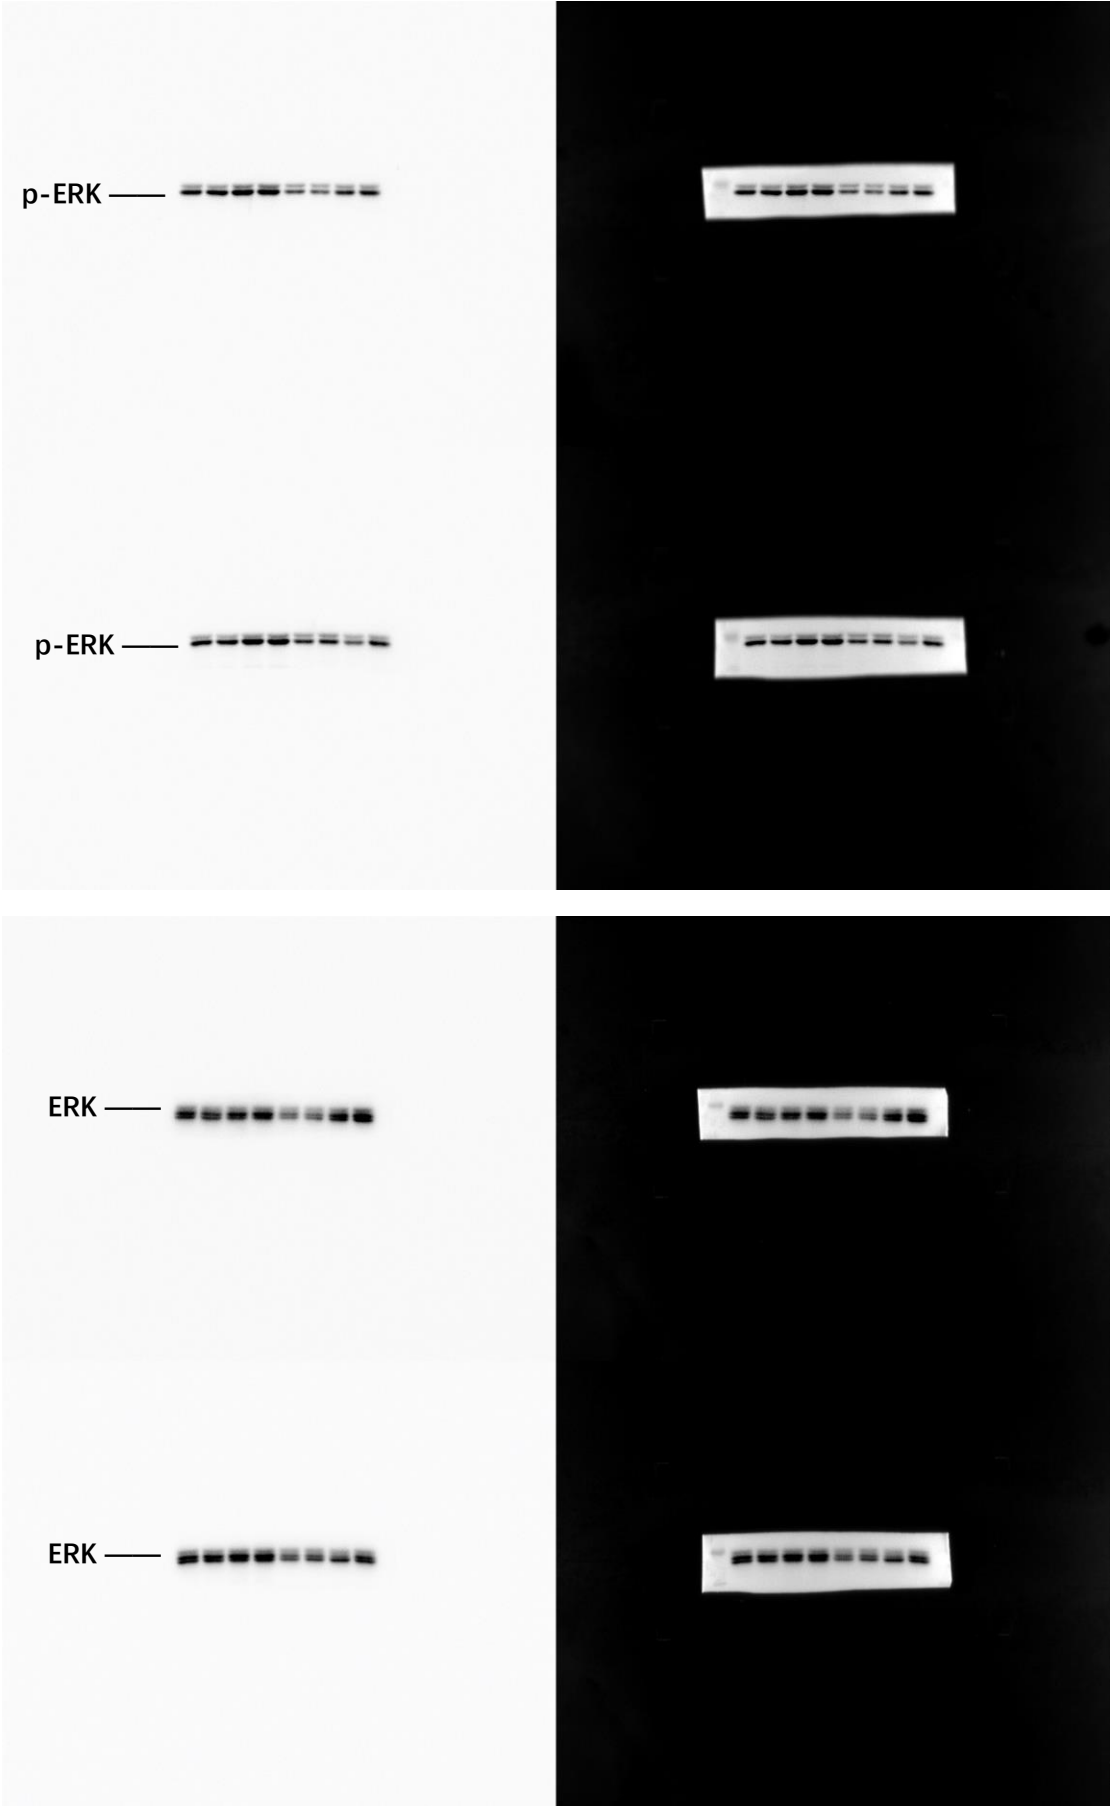

Figure 3C-claudin-5

Claudin-5 —

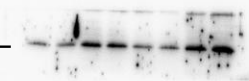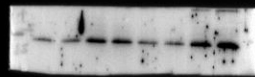

Claudin-5 —

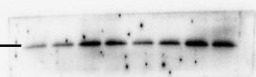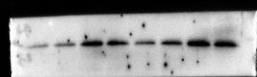

$\beta$ -actin —

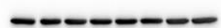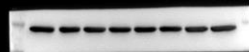

$\beta$ -actin —

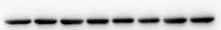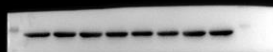

Figure 3C-VE-cadherin

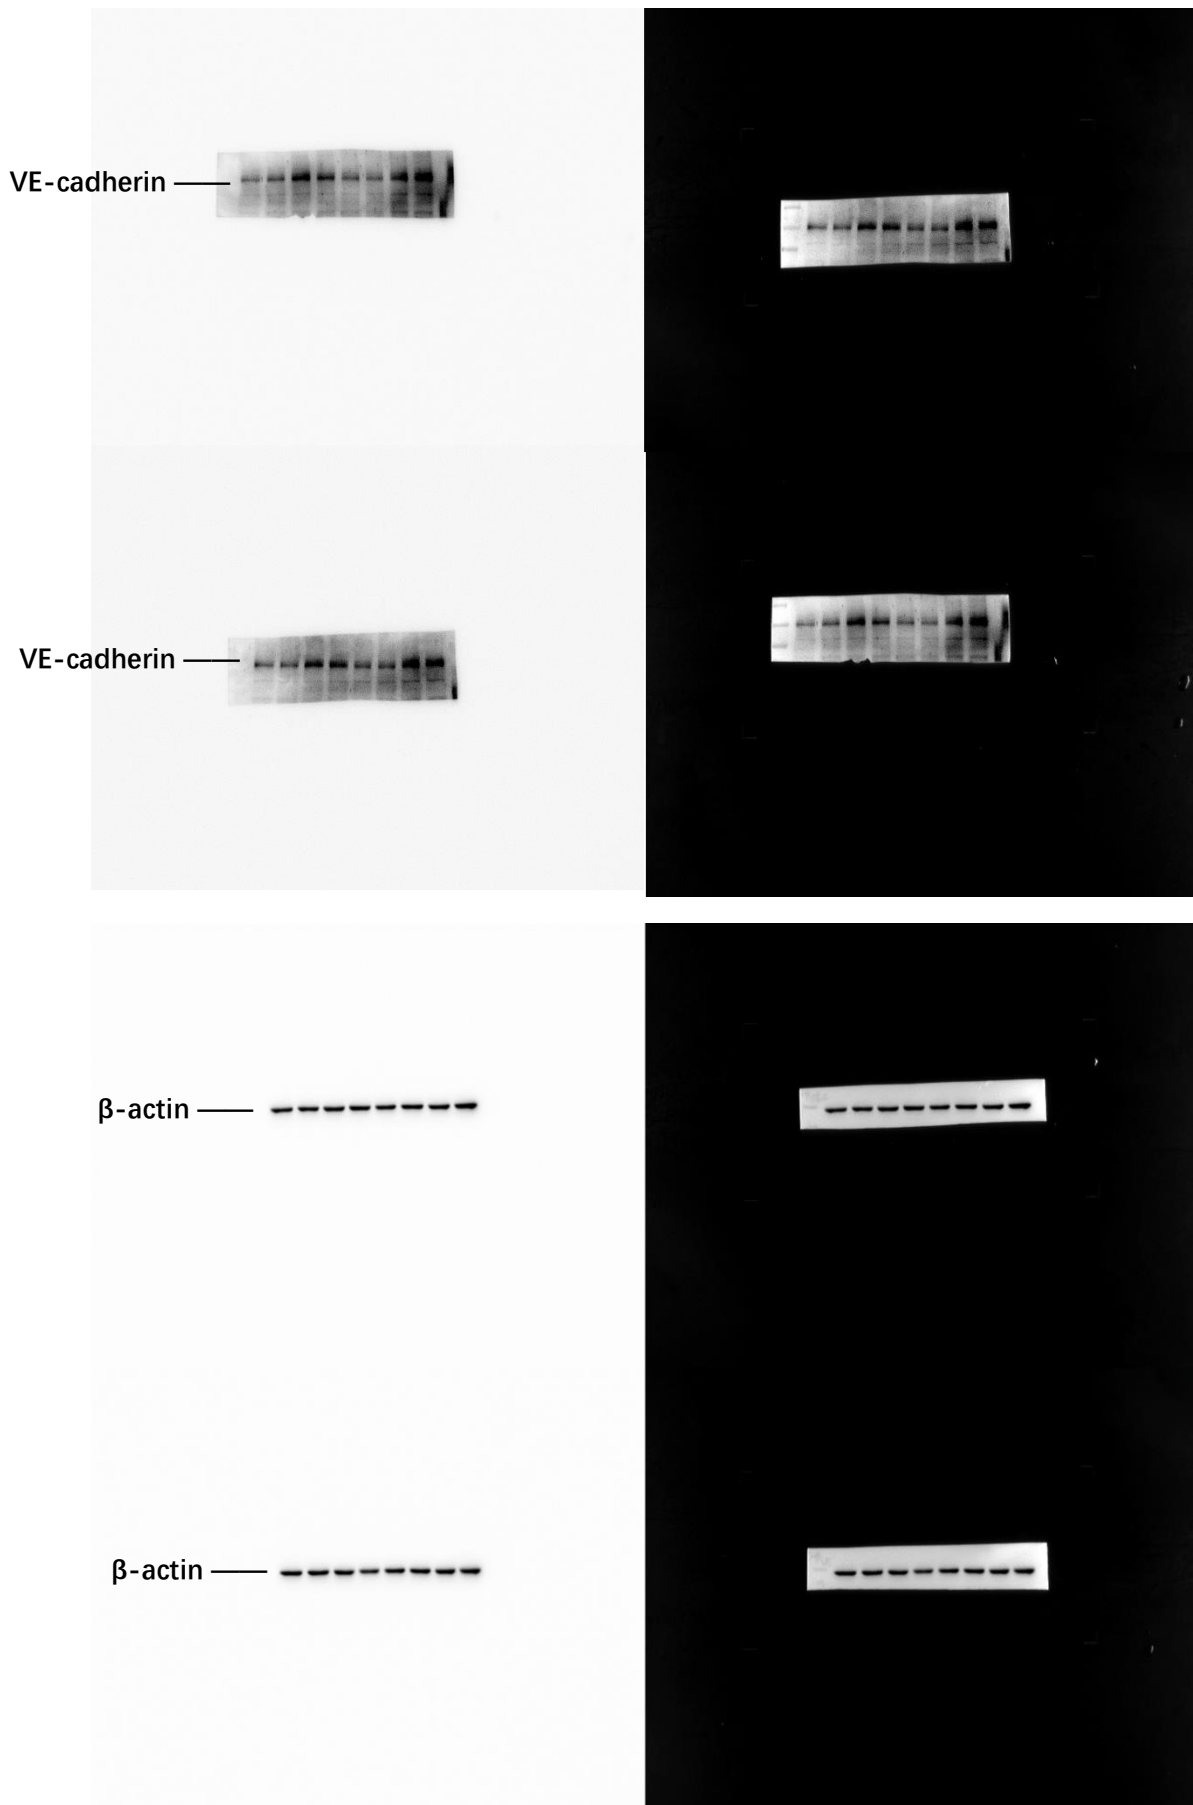

Figure 3C-p-JNK/JNK

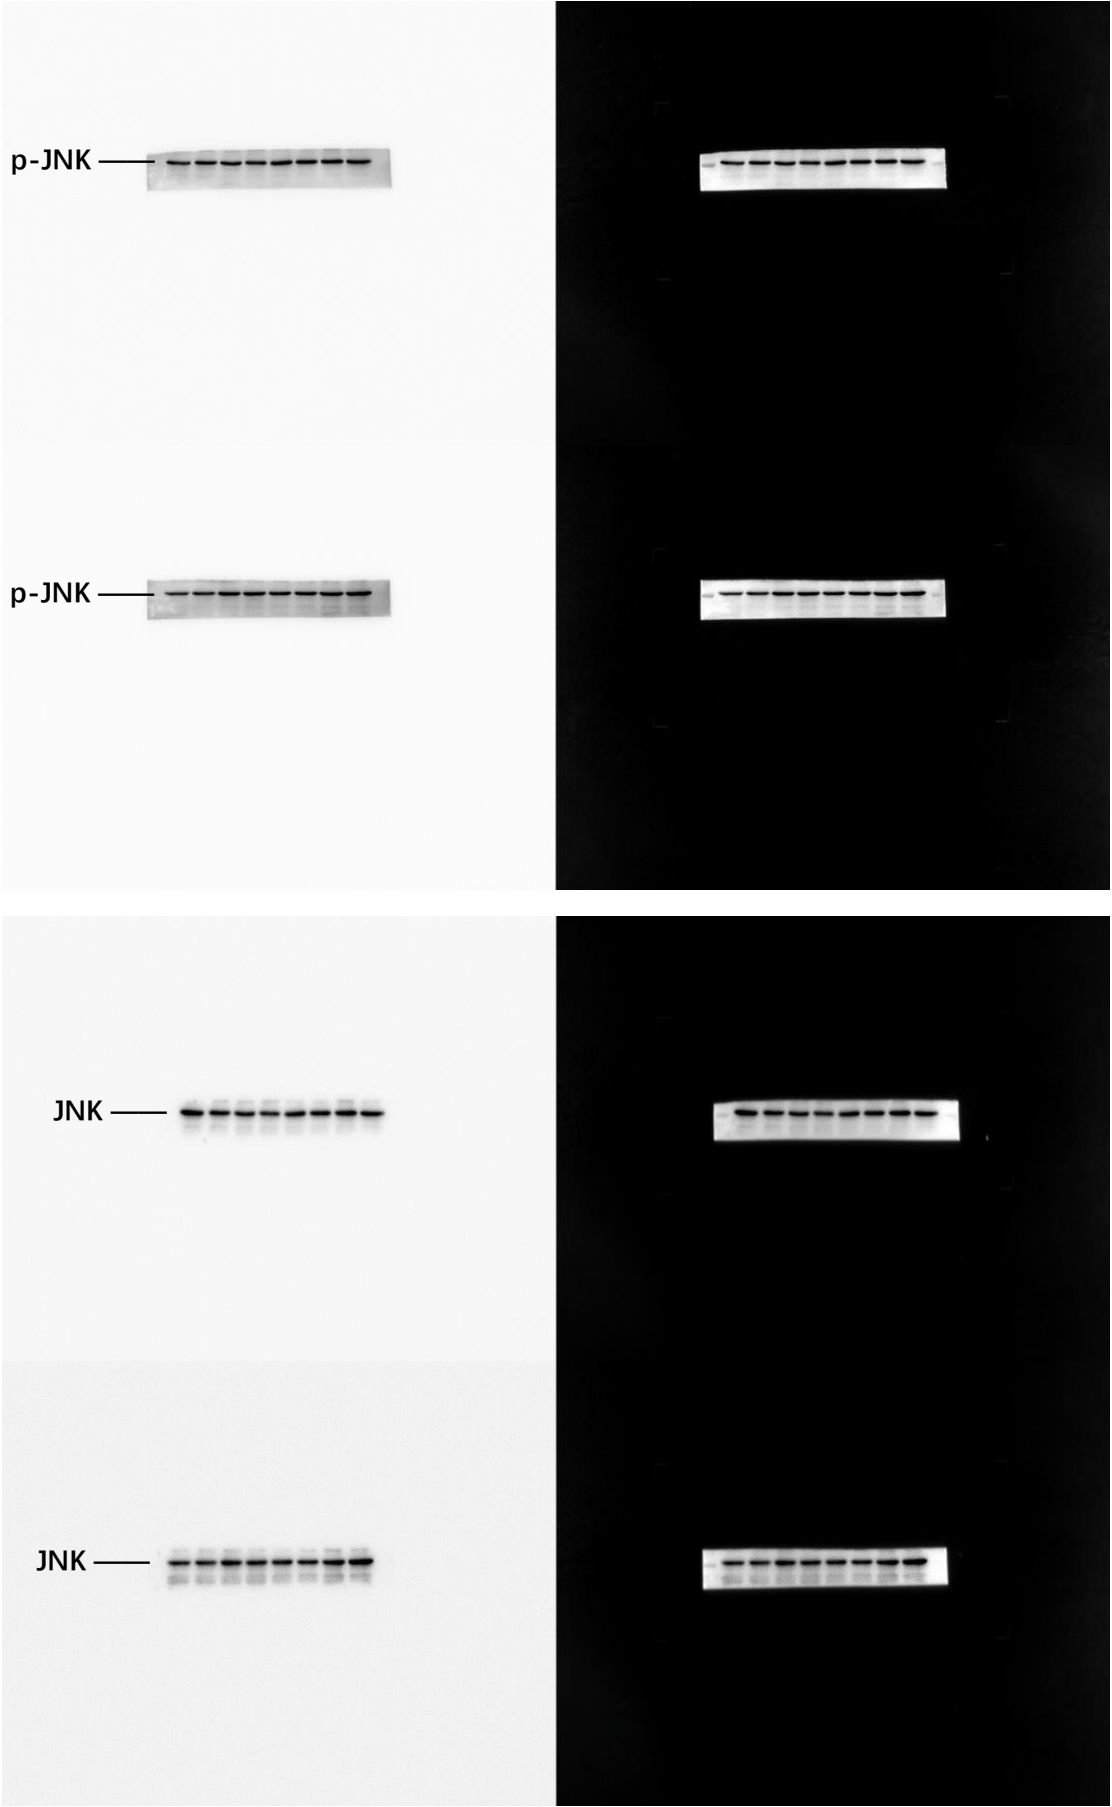

Western blot analysis of Claudin-5 and  $\beta$ -actin expression in C6 glioma cells. The blots show protein bands for Claudin-5 and  $\beta$ -actin across multiple lanes. The top row shows Claudin-5 bands, and the bottom row shows  $\beta$ -actin bands. The left column shows the original blots, and the right column shows the corresponding images with a black background for enhanced contrast.

## Claudin-5

$\beta$ -actin

**β-actin**

Figure 3D-VE-cadherin

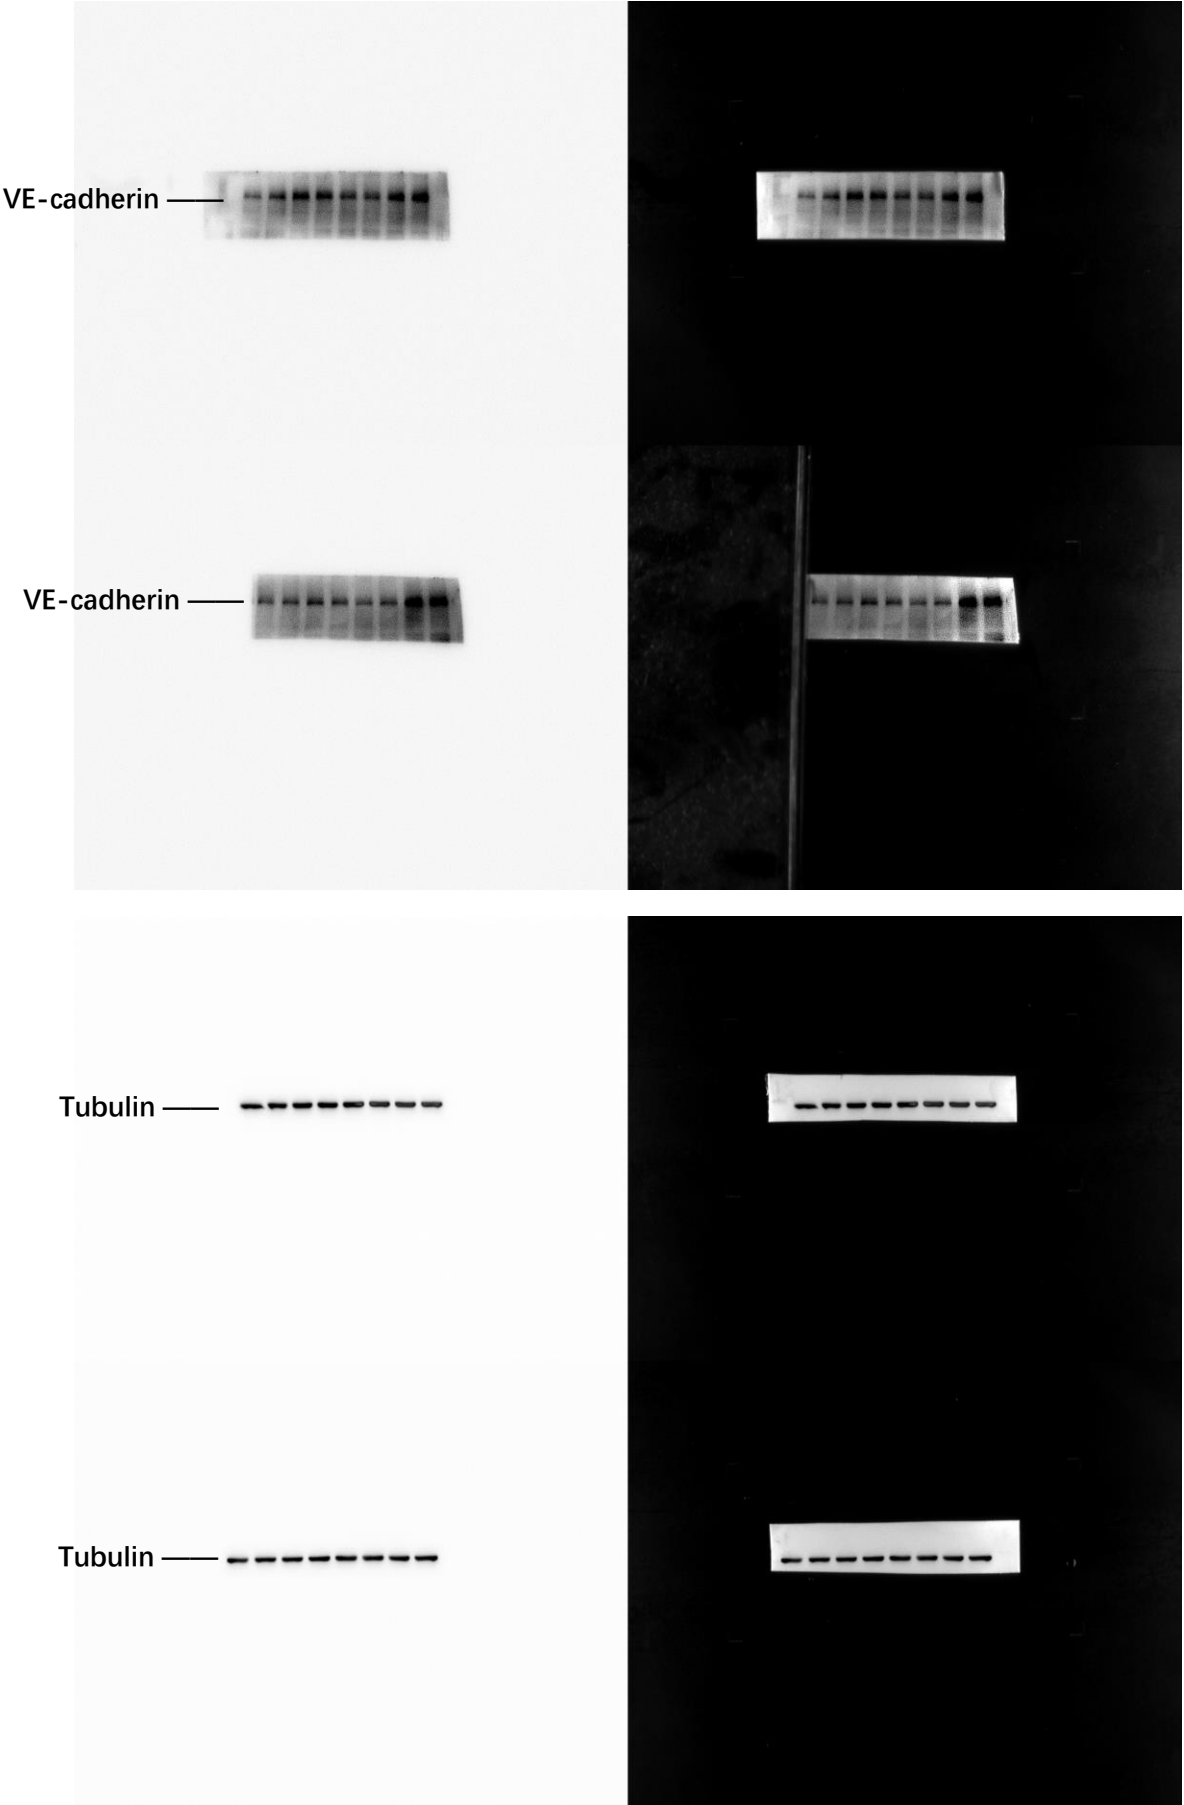

Figure 3D-p-p38/p38

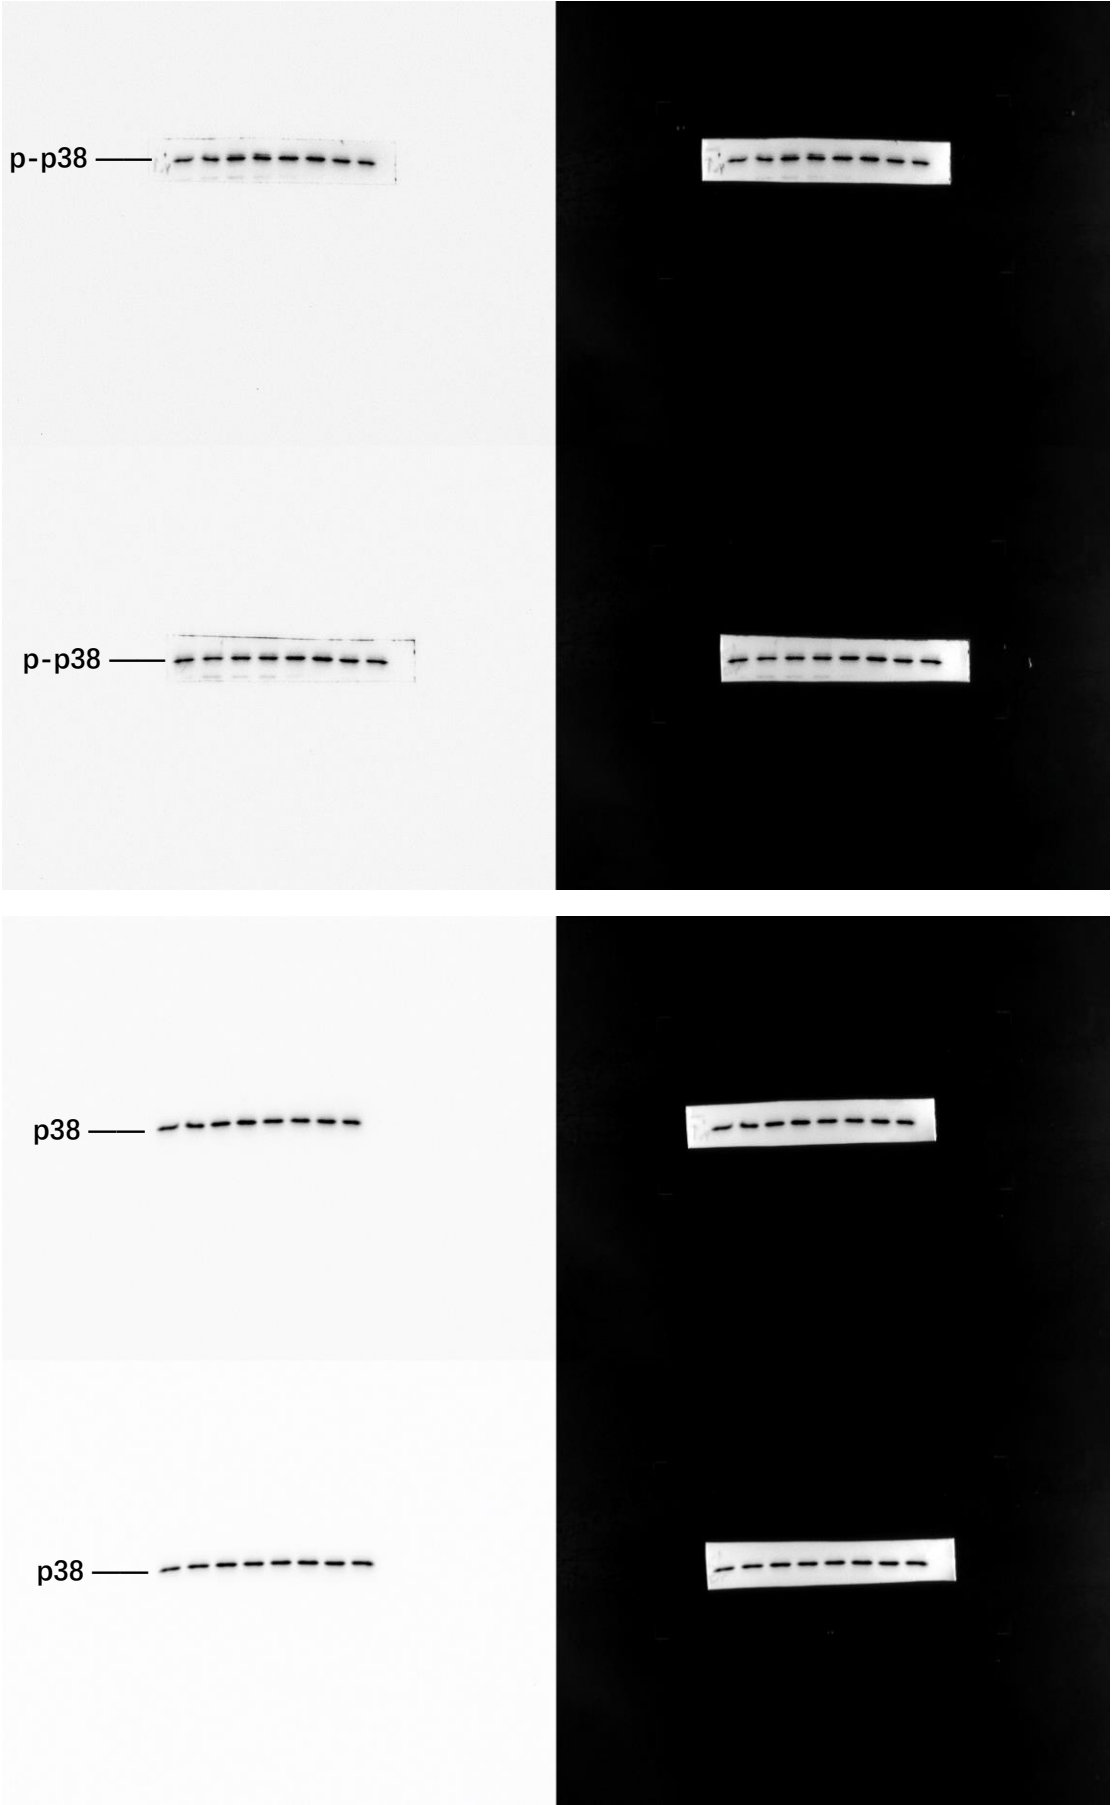

Figure 3E-p-AKT/AKT

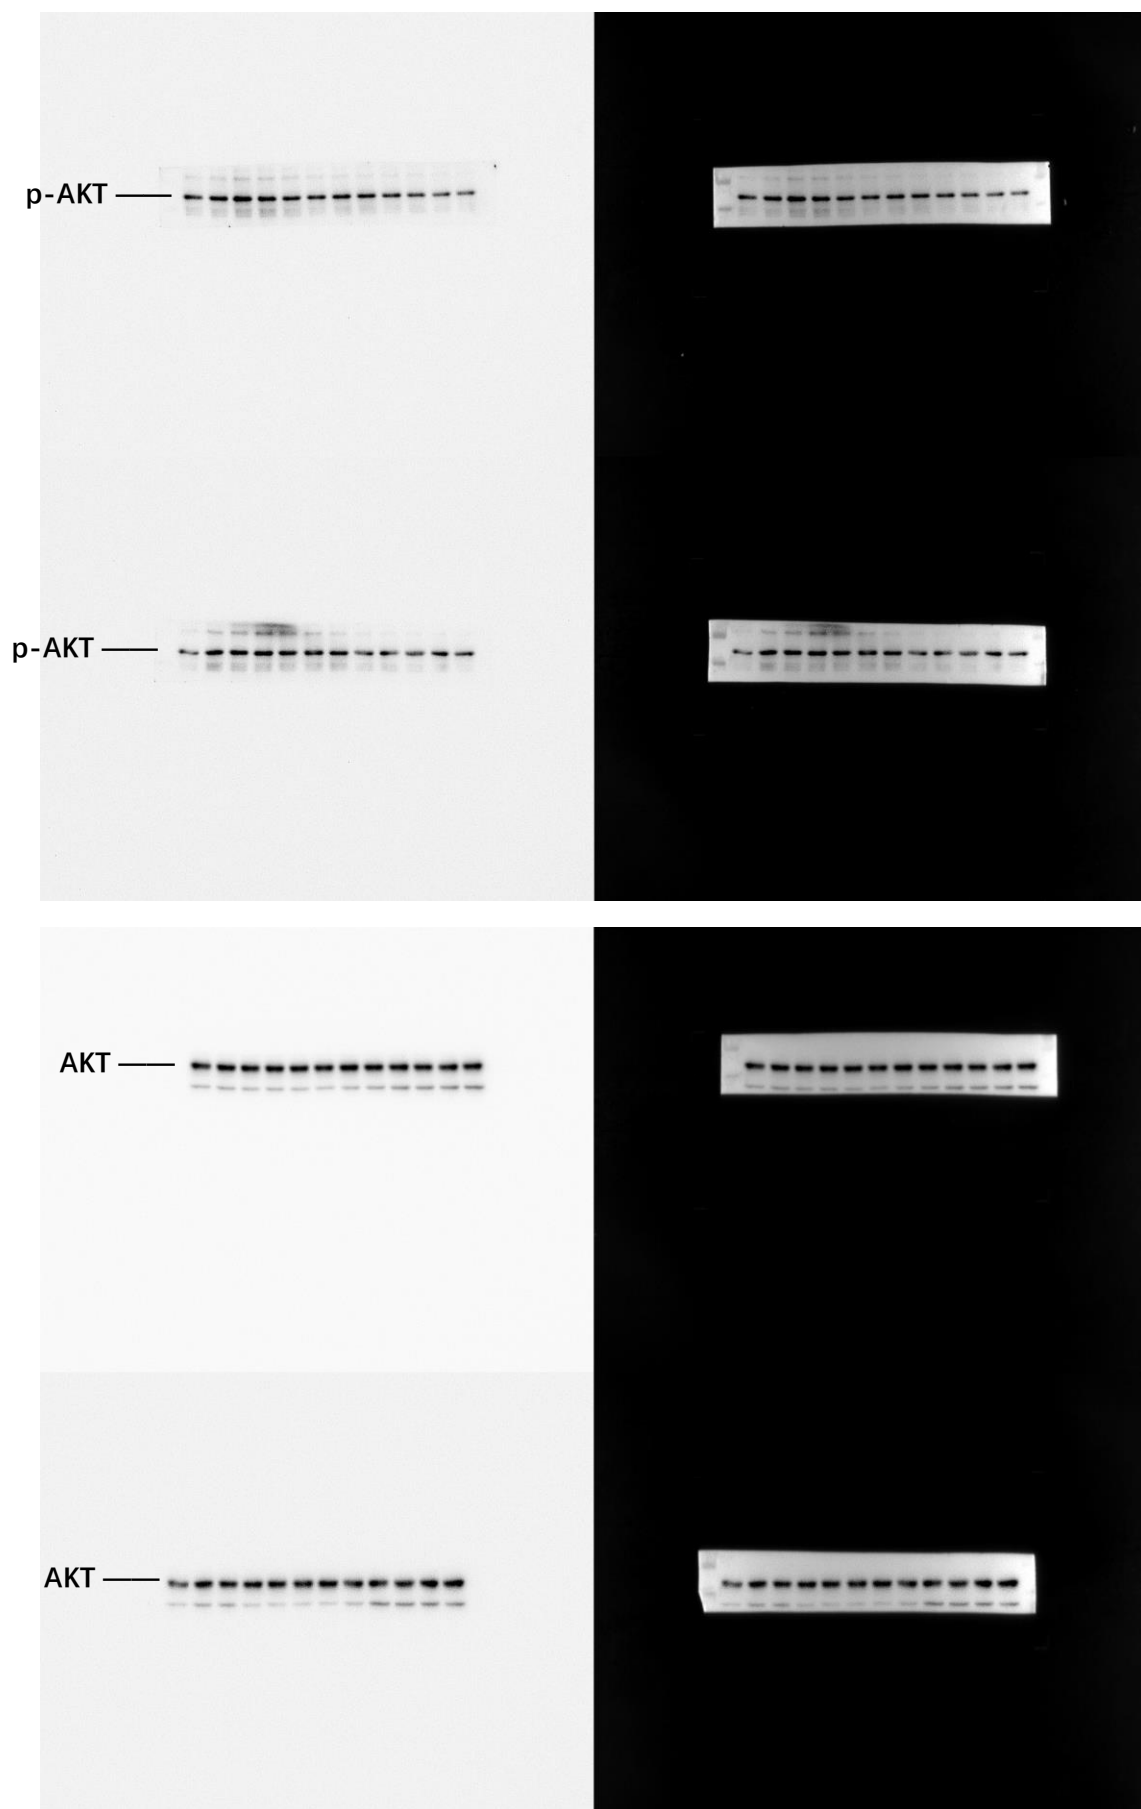

Tubulin ———

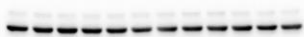

Tubulin ———

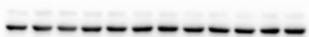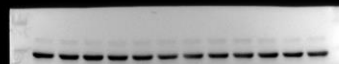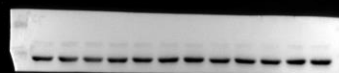

Figure 3E-p-ERK/ERK

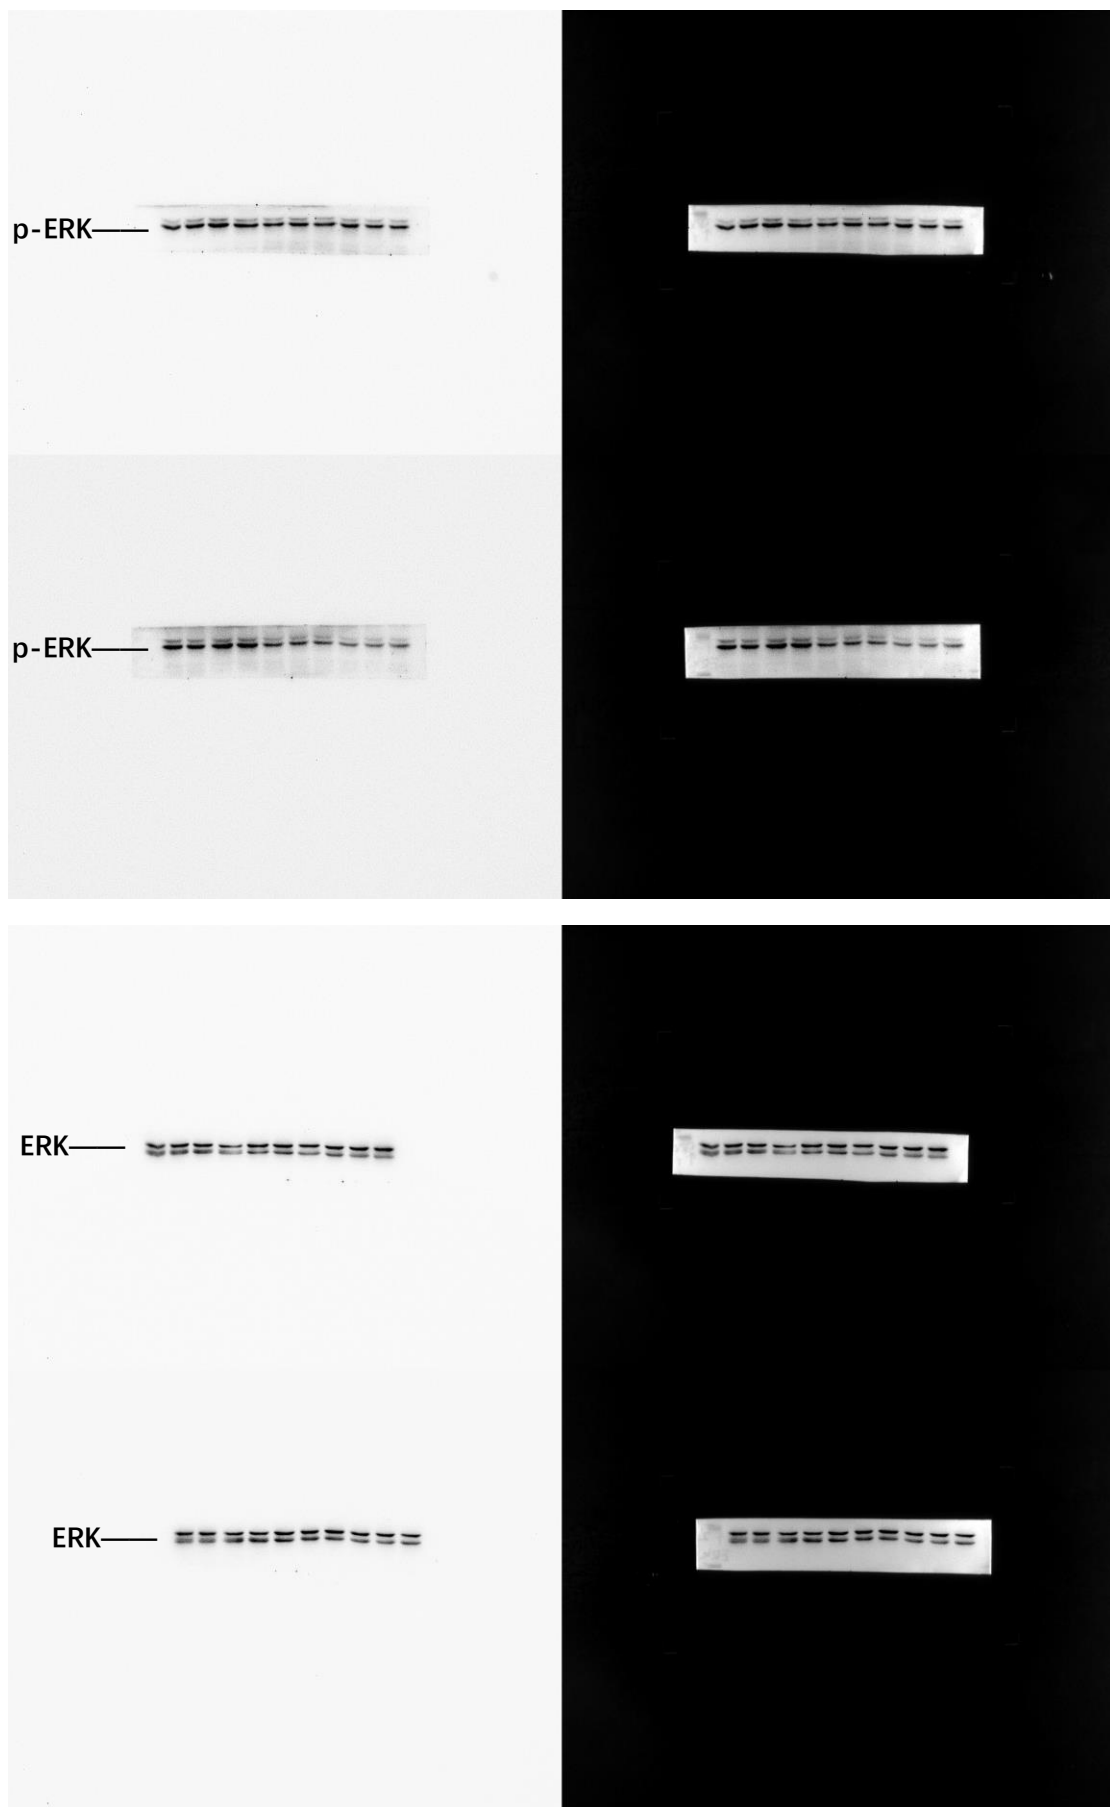

Tubulin ———

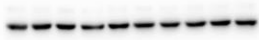

Tubulin ———

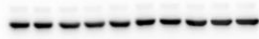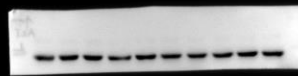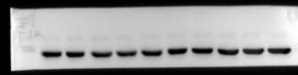

Figure 3F-claudin-5

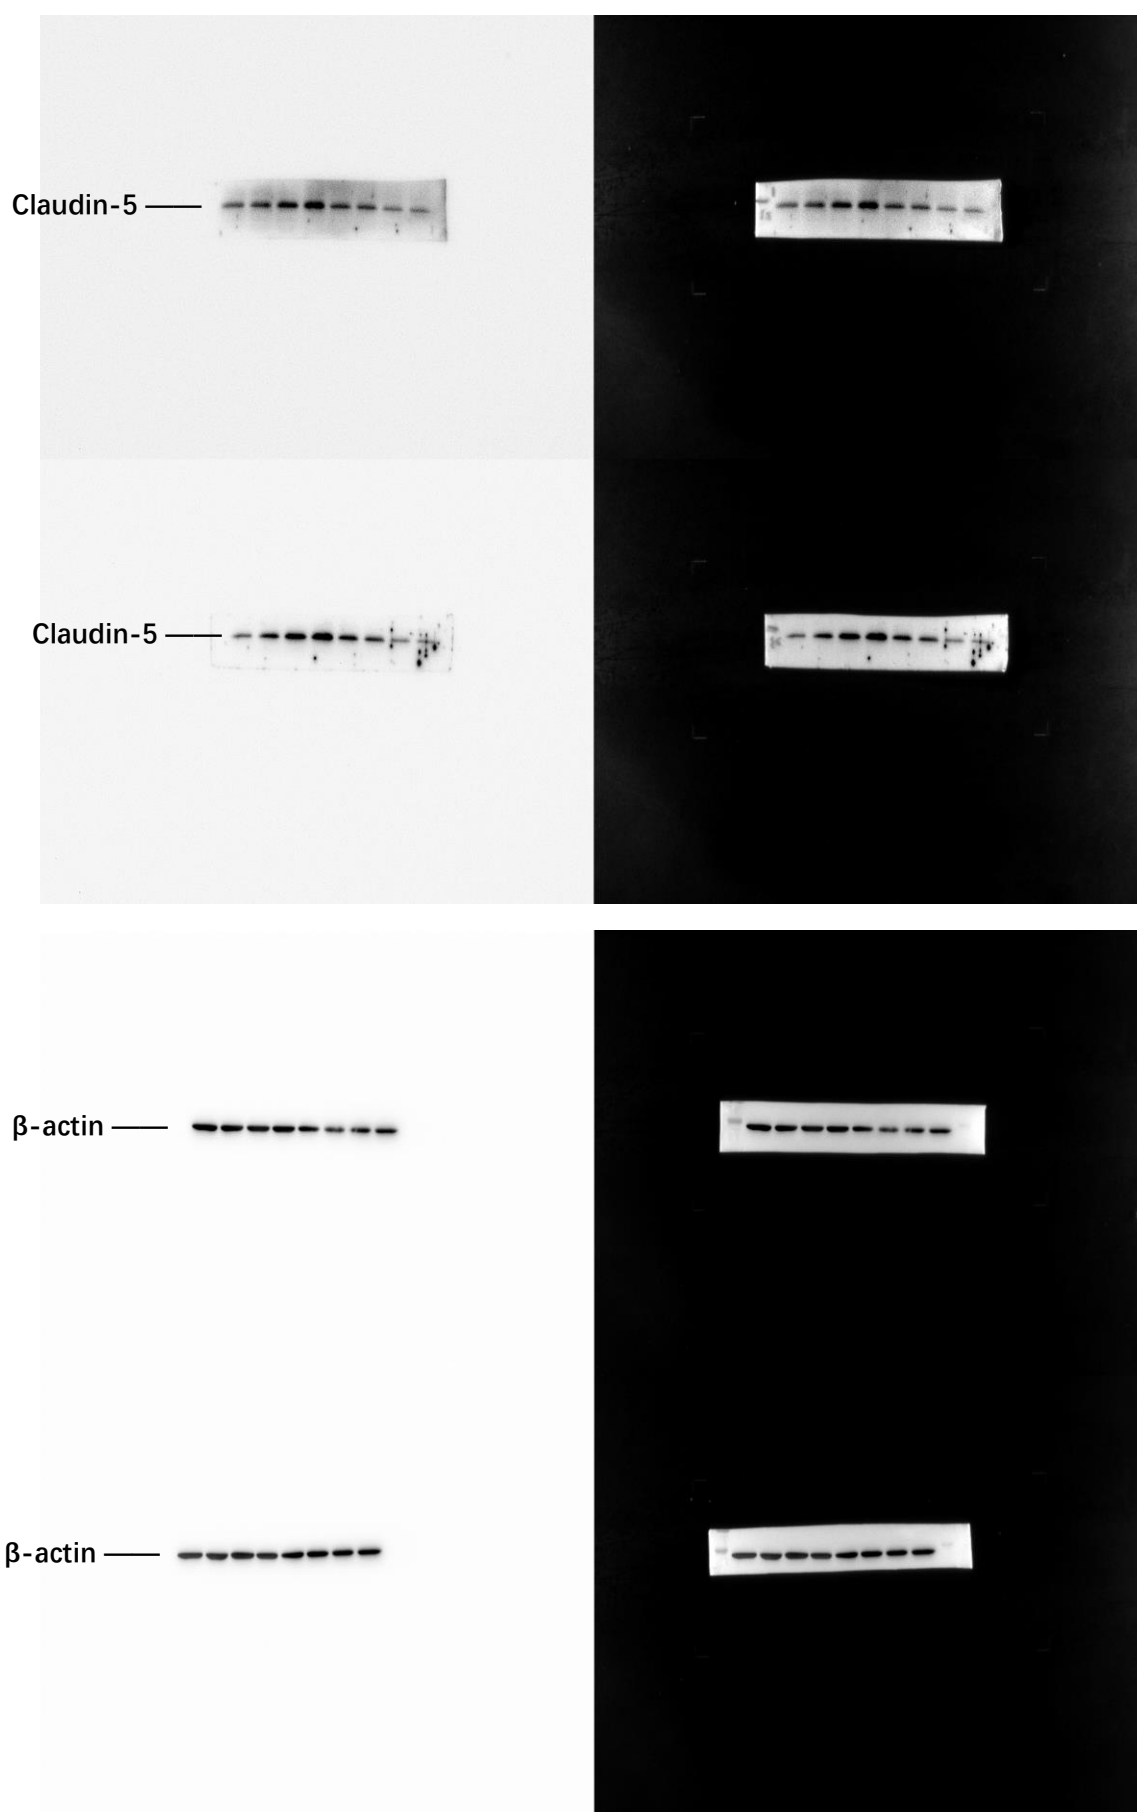

Figure 3F-VE-cadherin

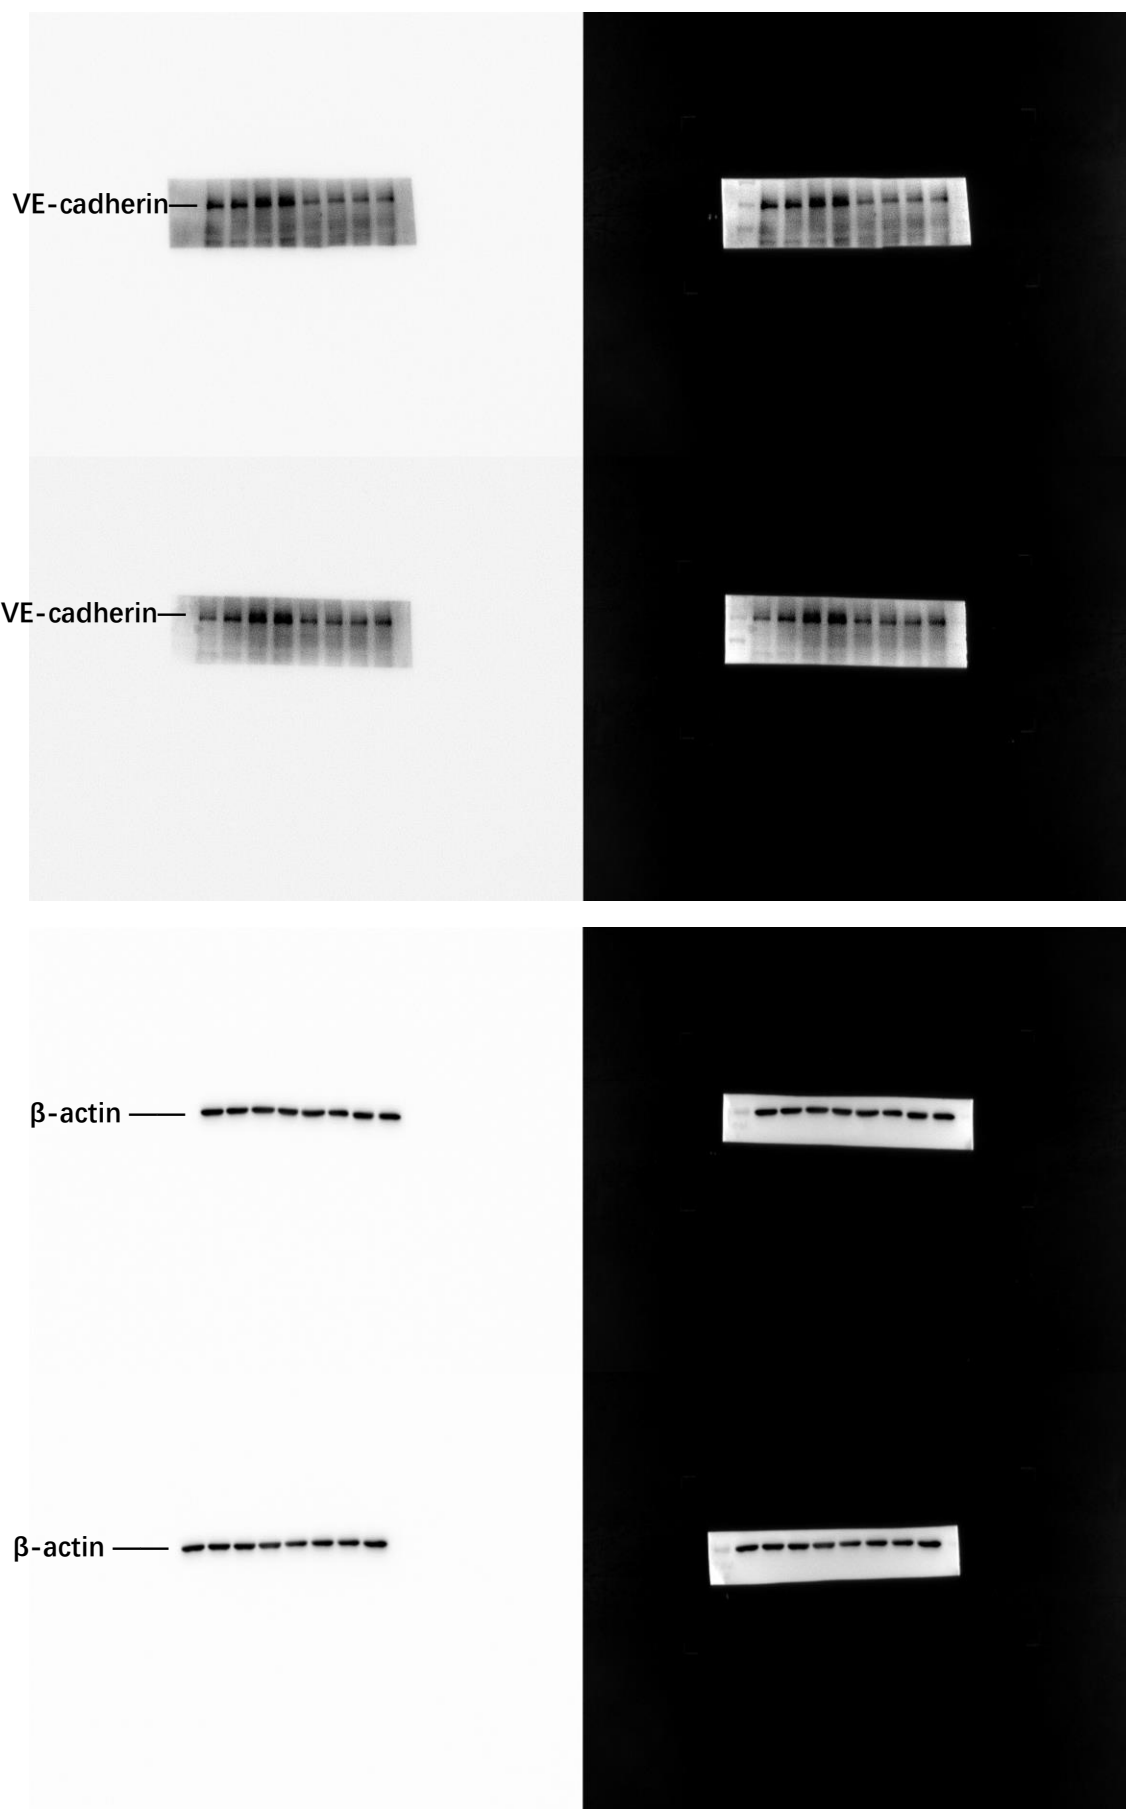

Figure 3F-p-AKT/AKT

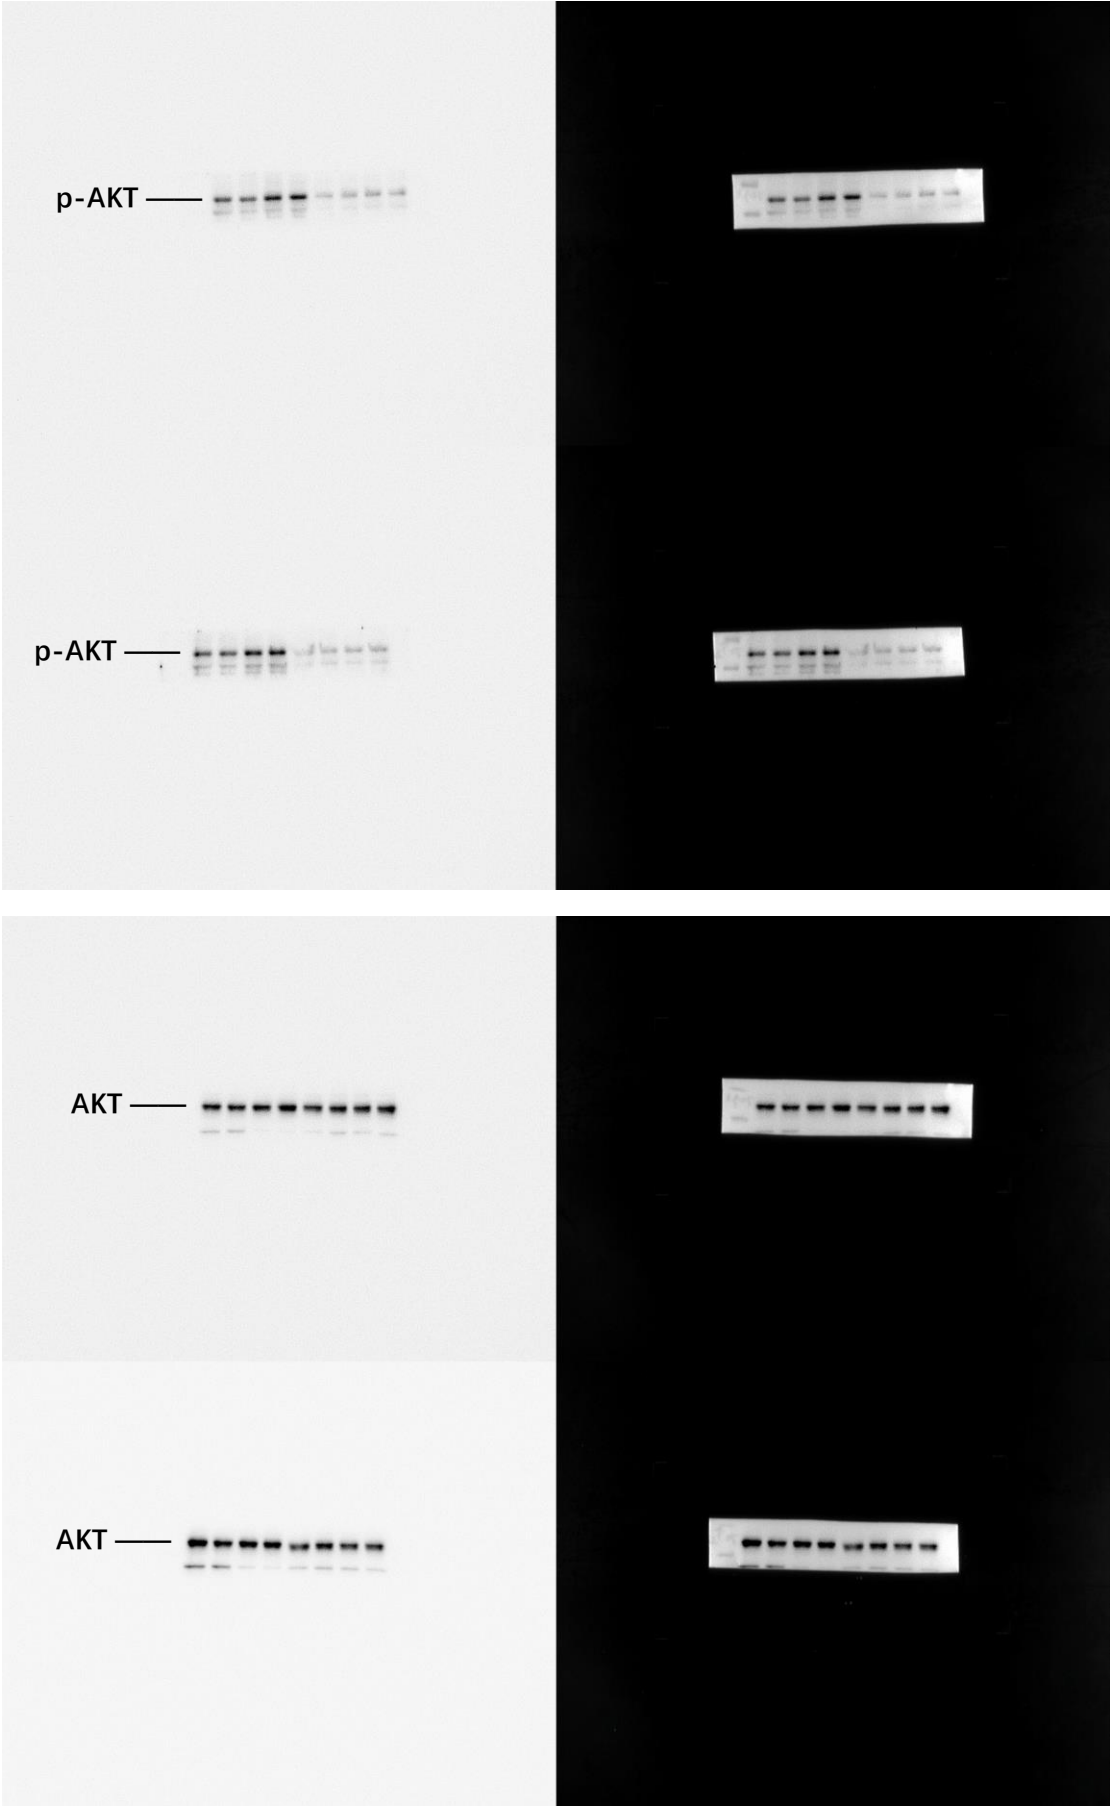

Figure 3G-claudin-5

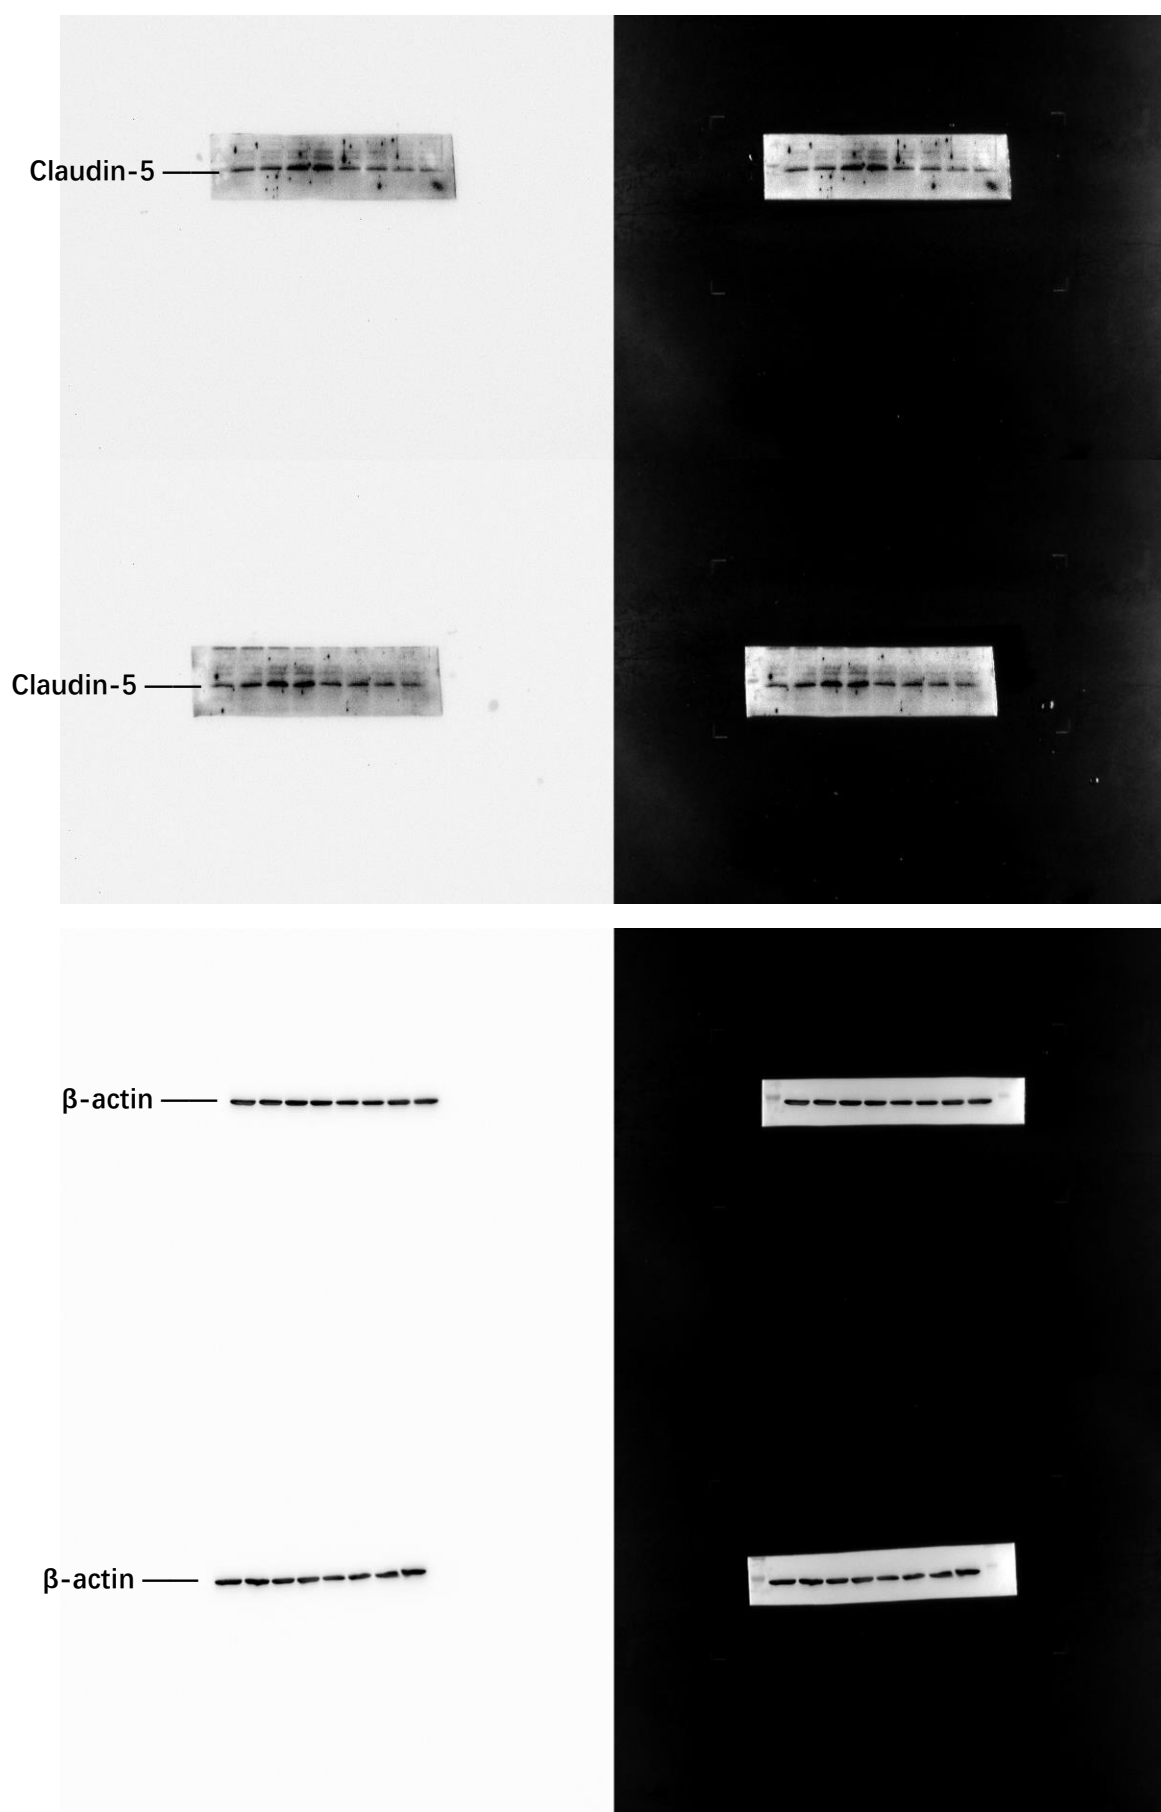

Figure 3G-VE-cadherin

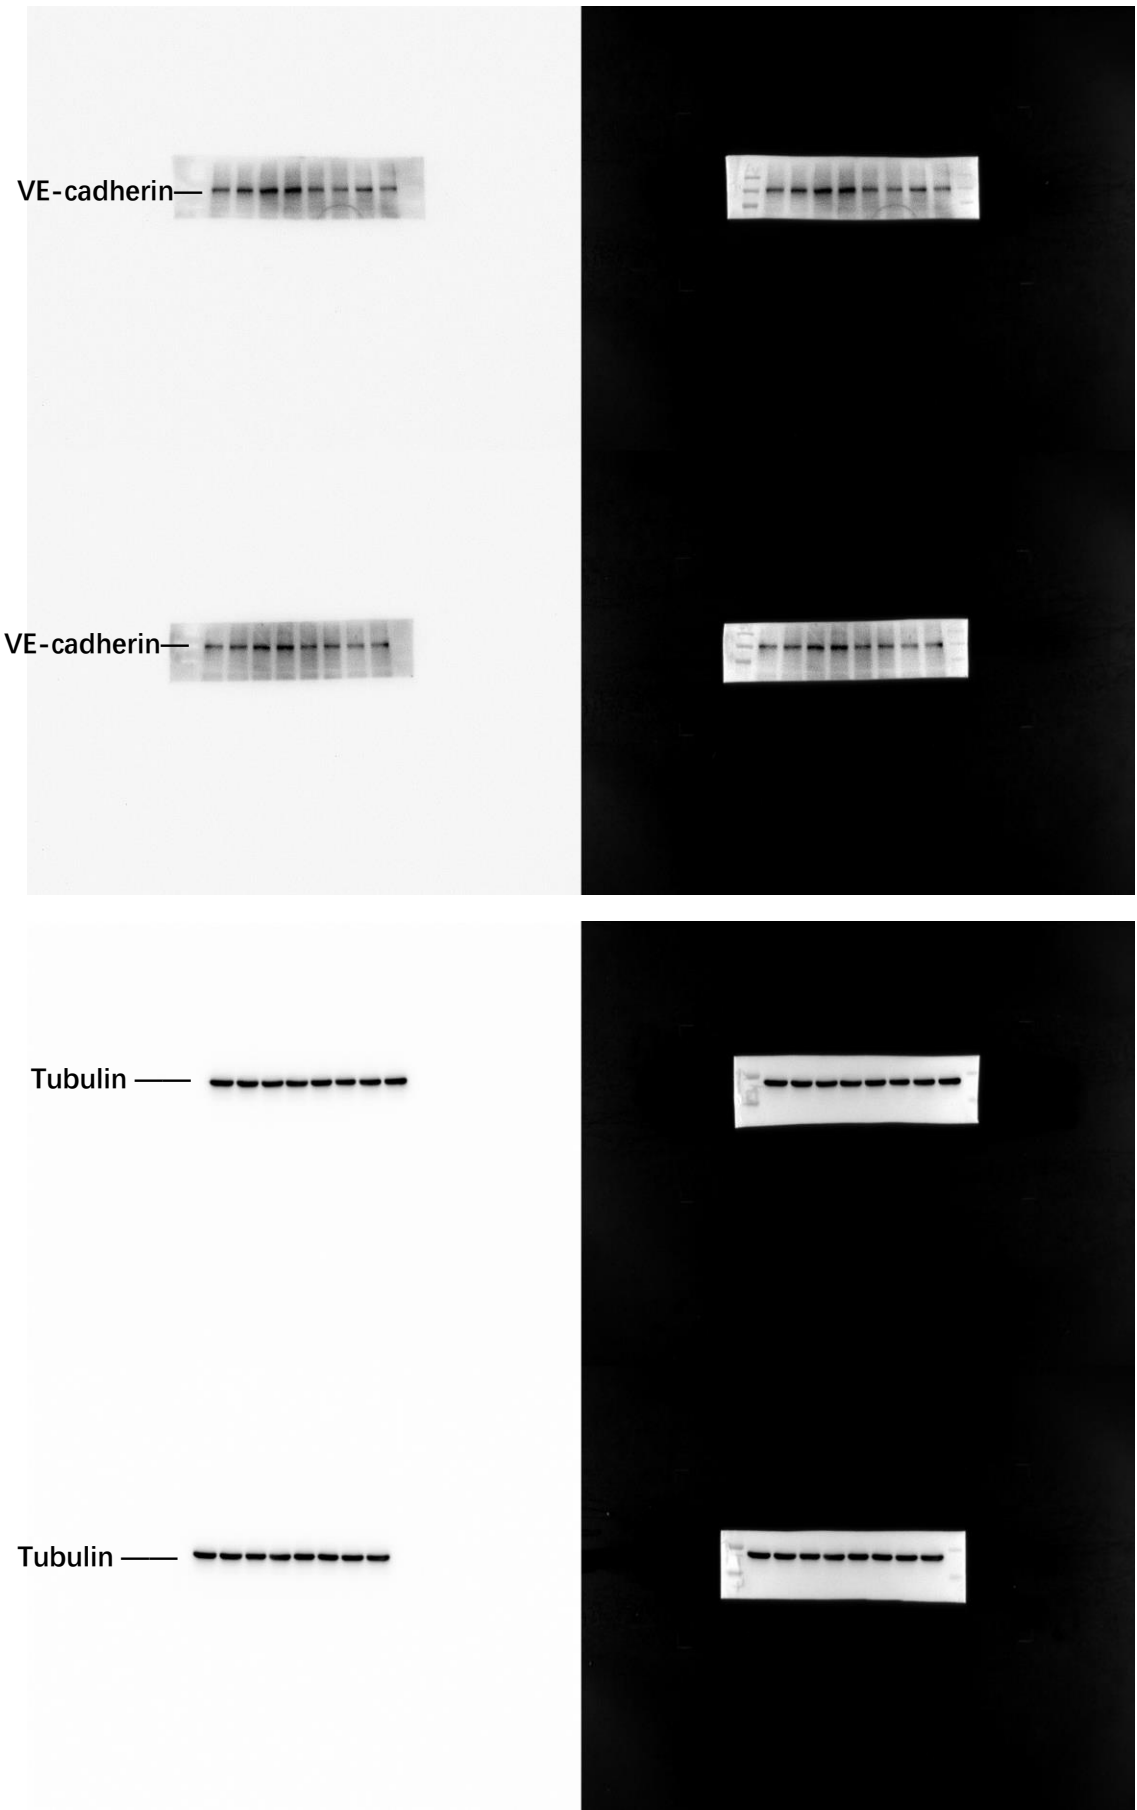

Figure 3G-p-ERK/ERK

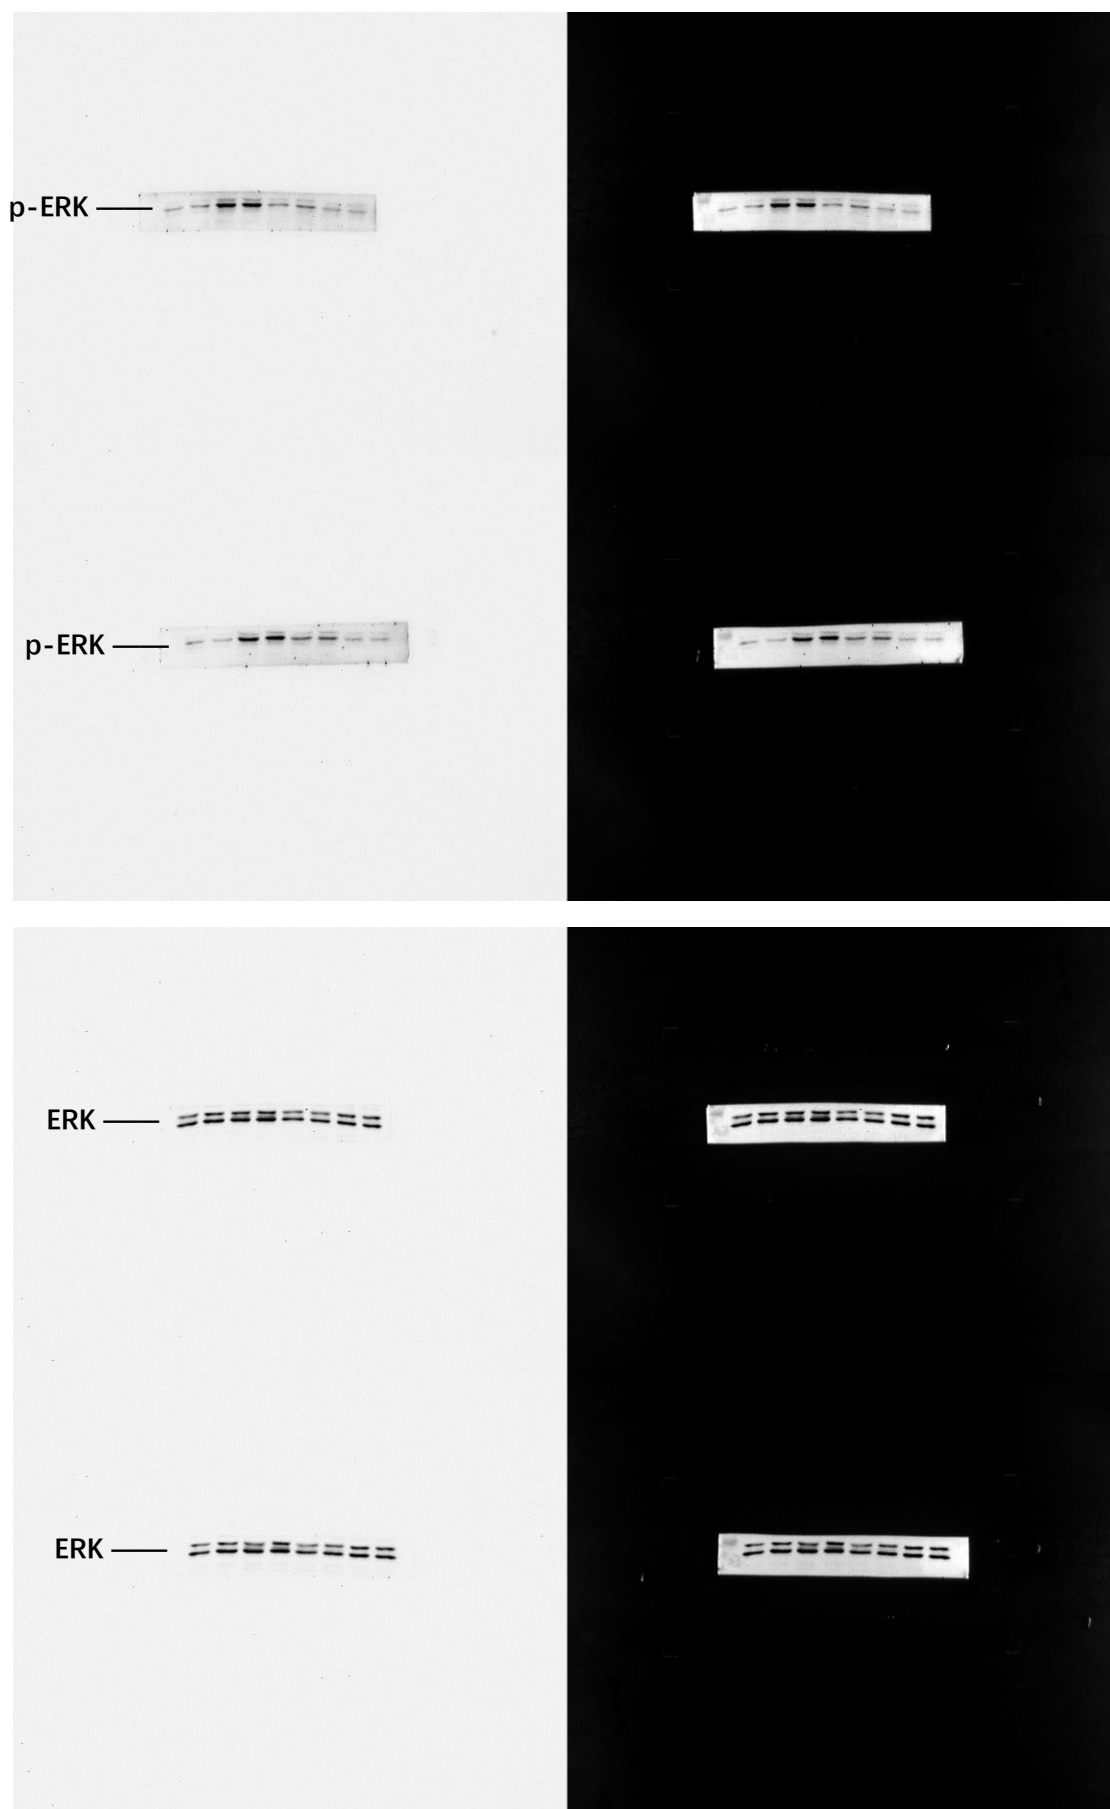

Figure 3H-Claudin-5

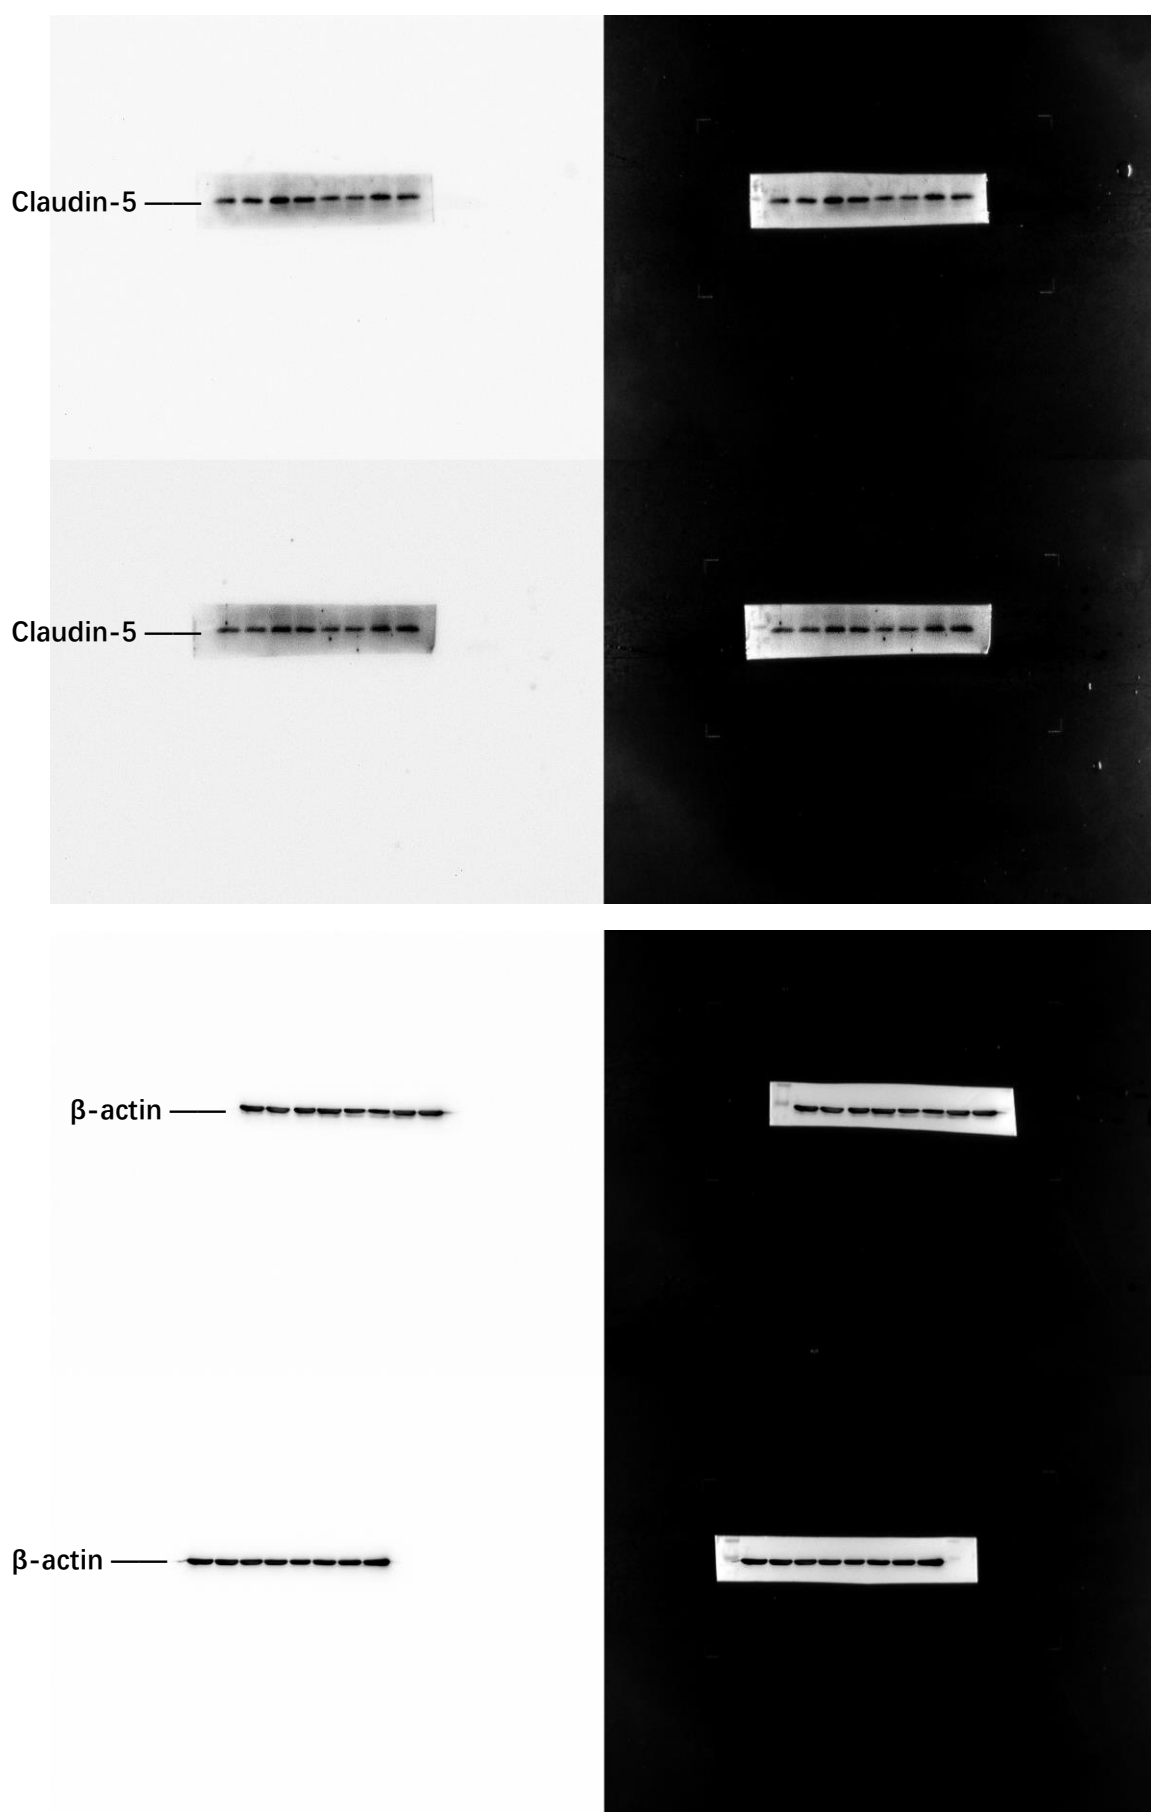

Figure 3H-VE-cadherin

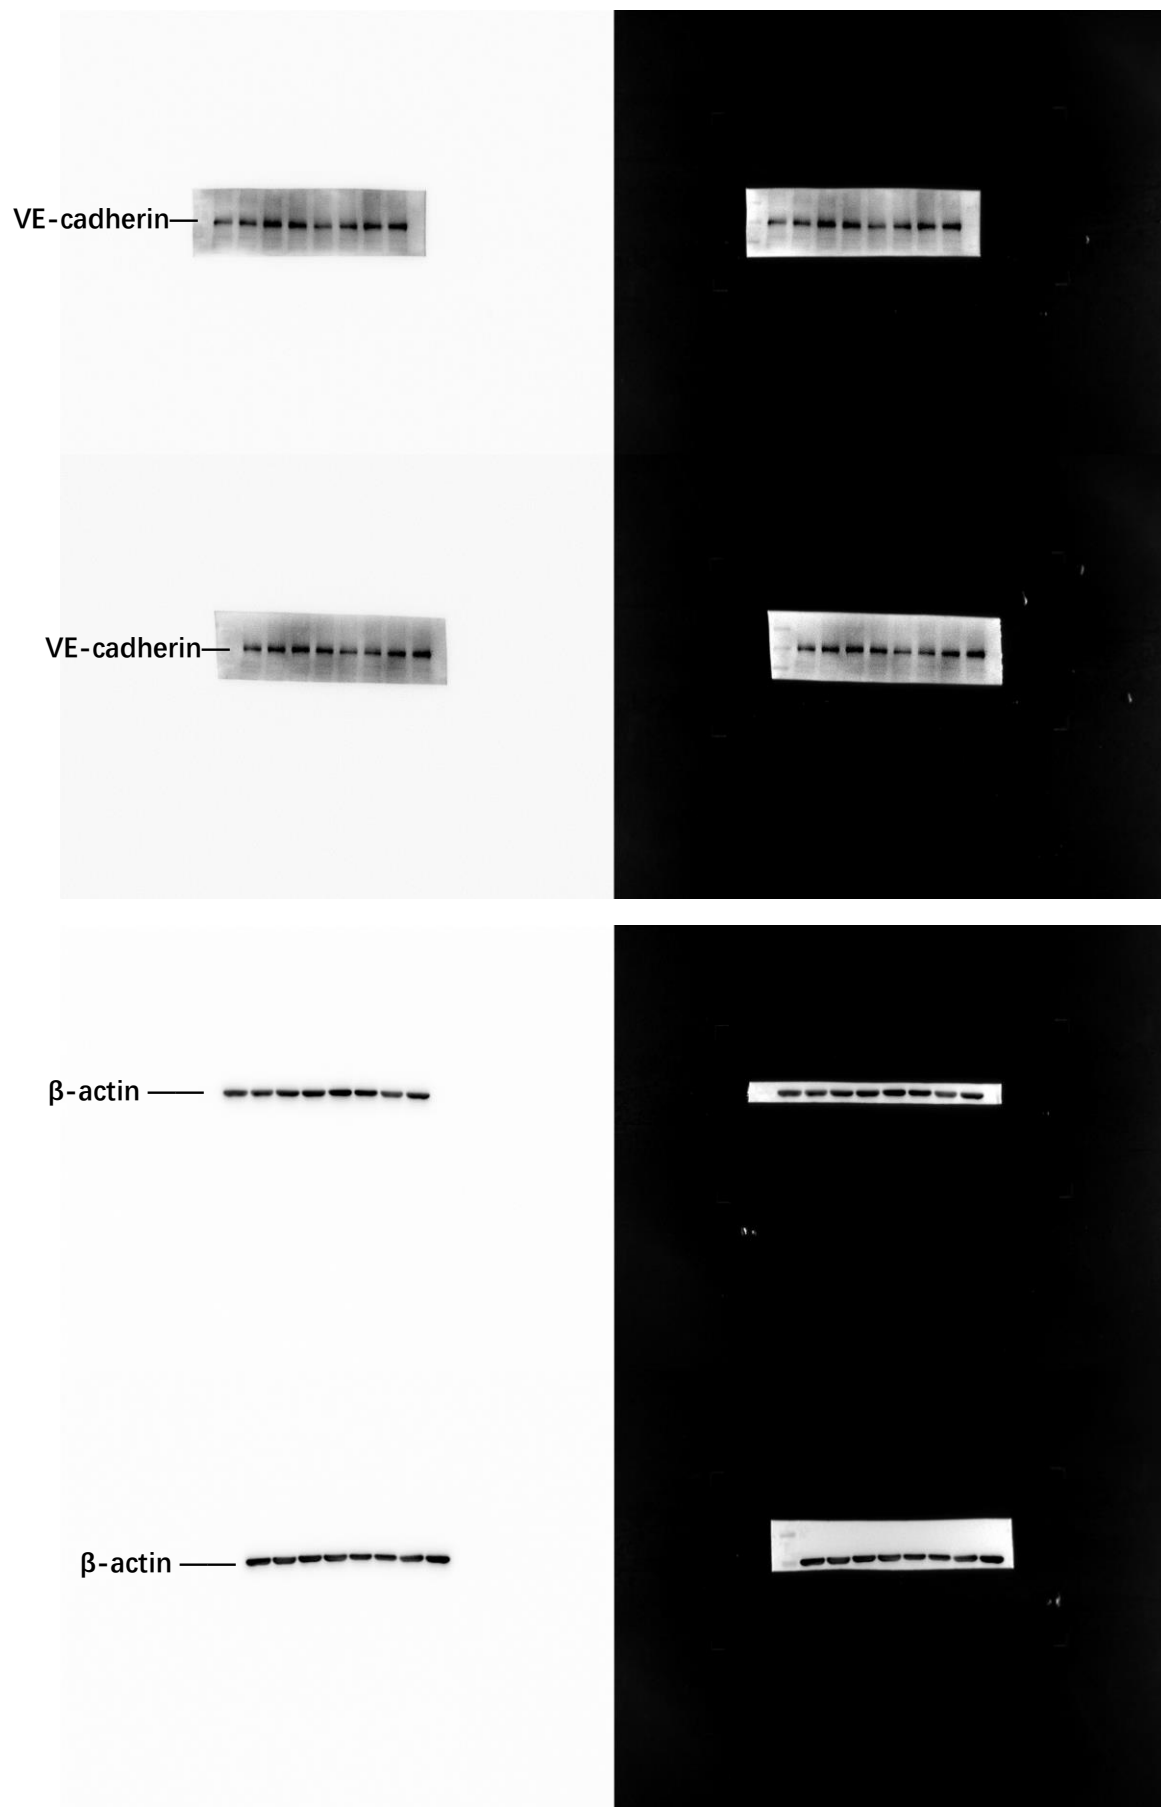

Figure 3H-p-JNK/JNK

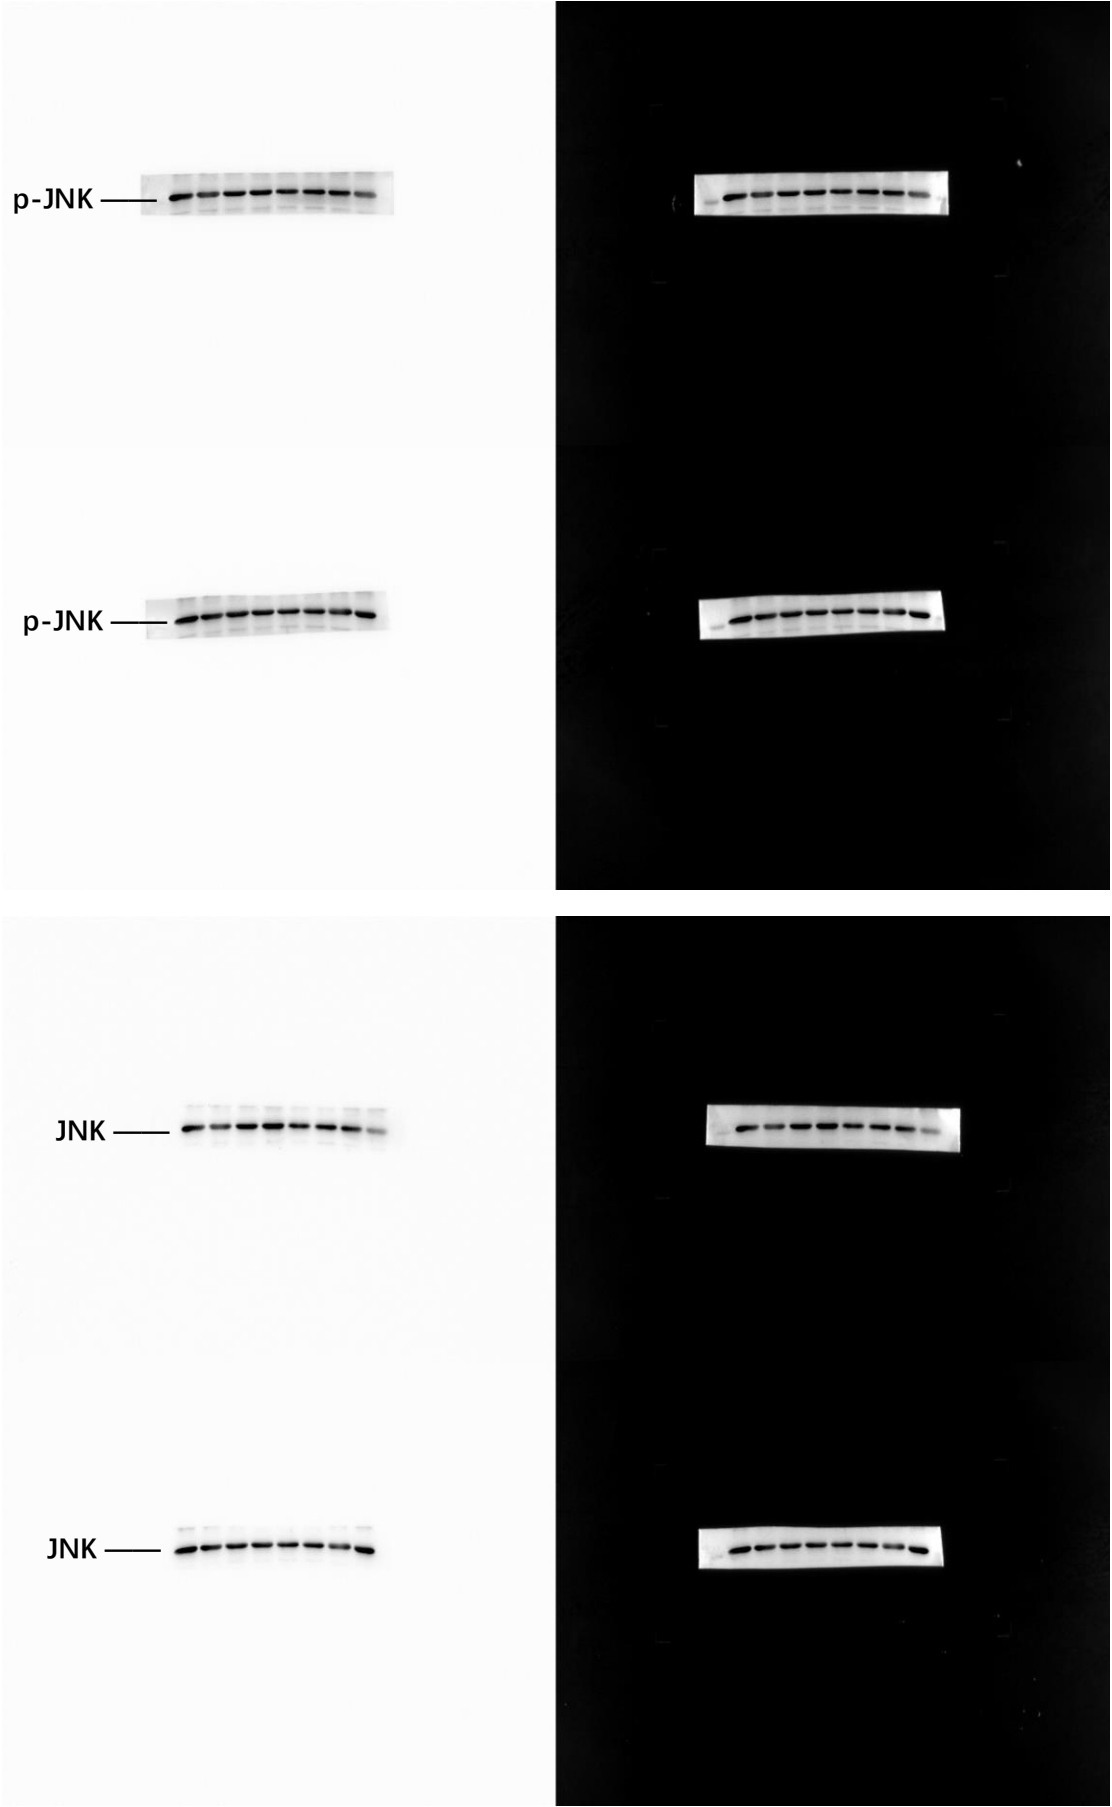

Figure 3I-Claudin-5

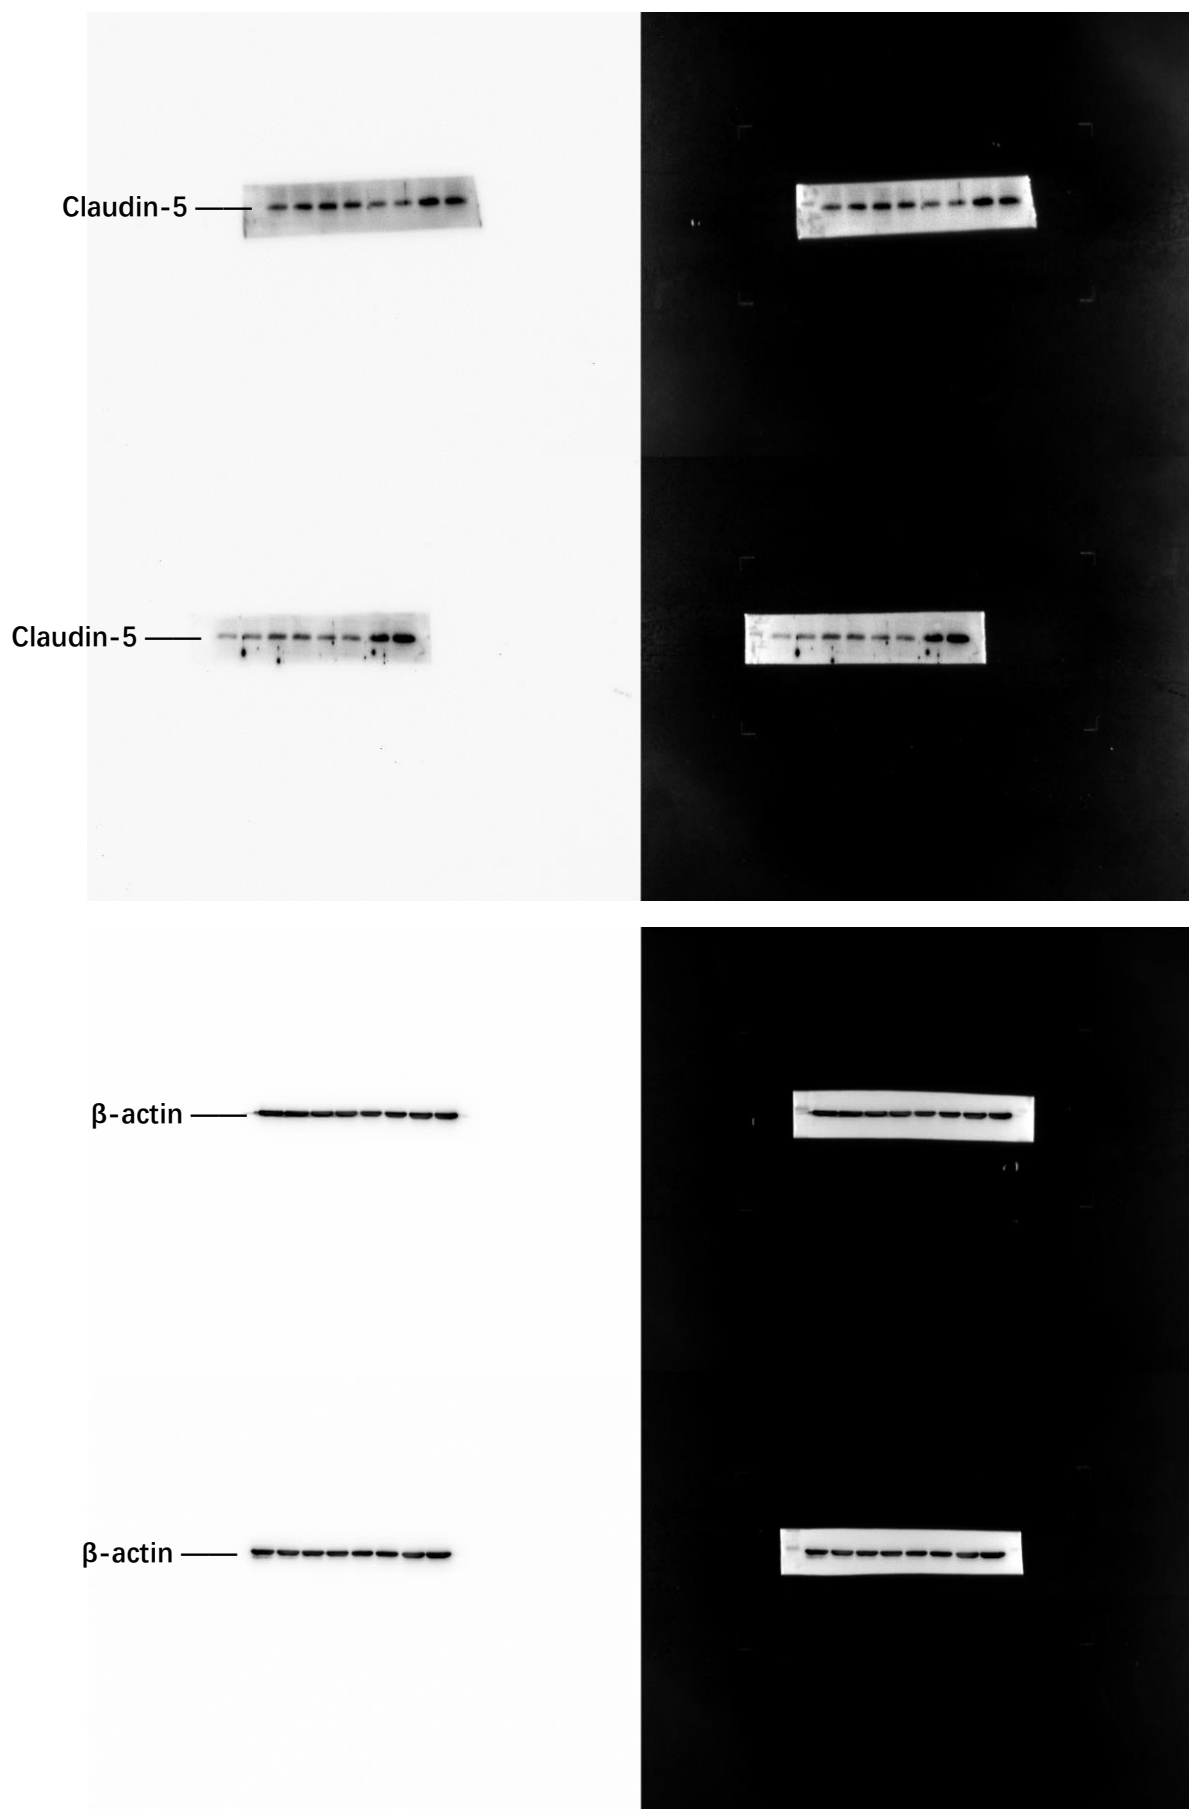

Figure 3I-VE-cadherin

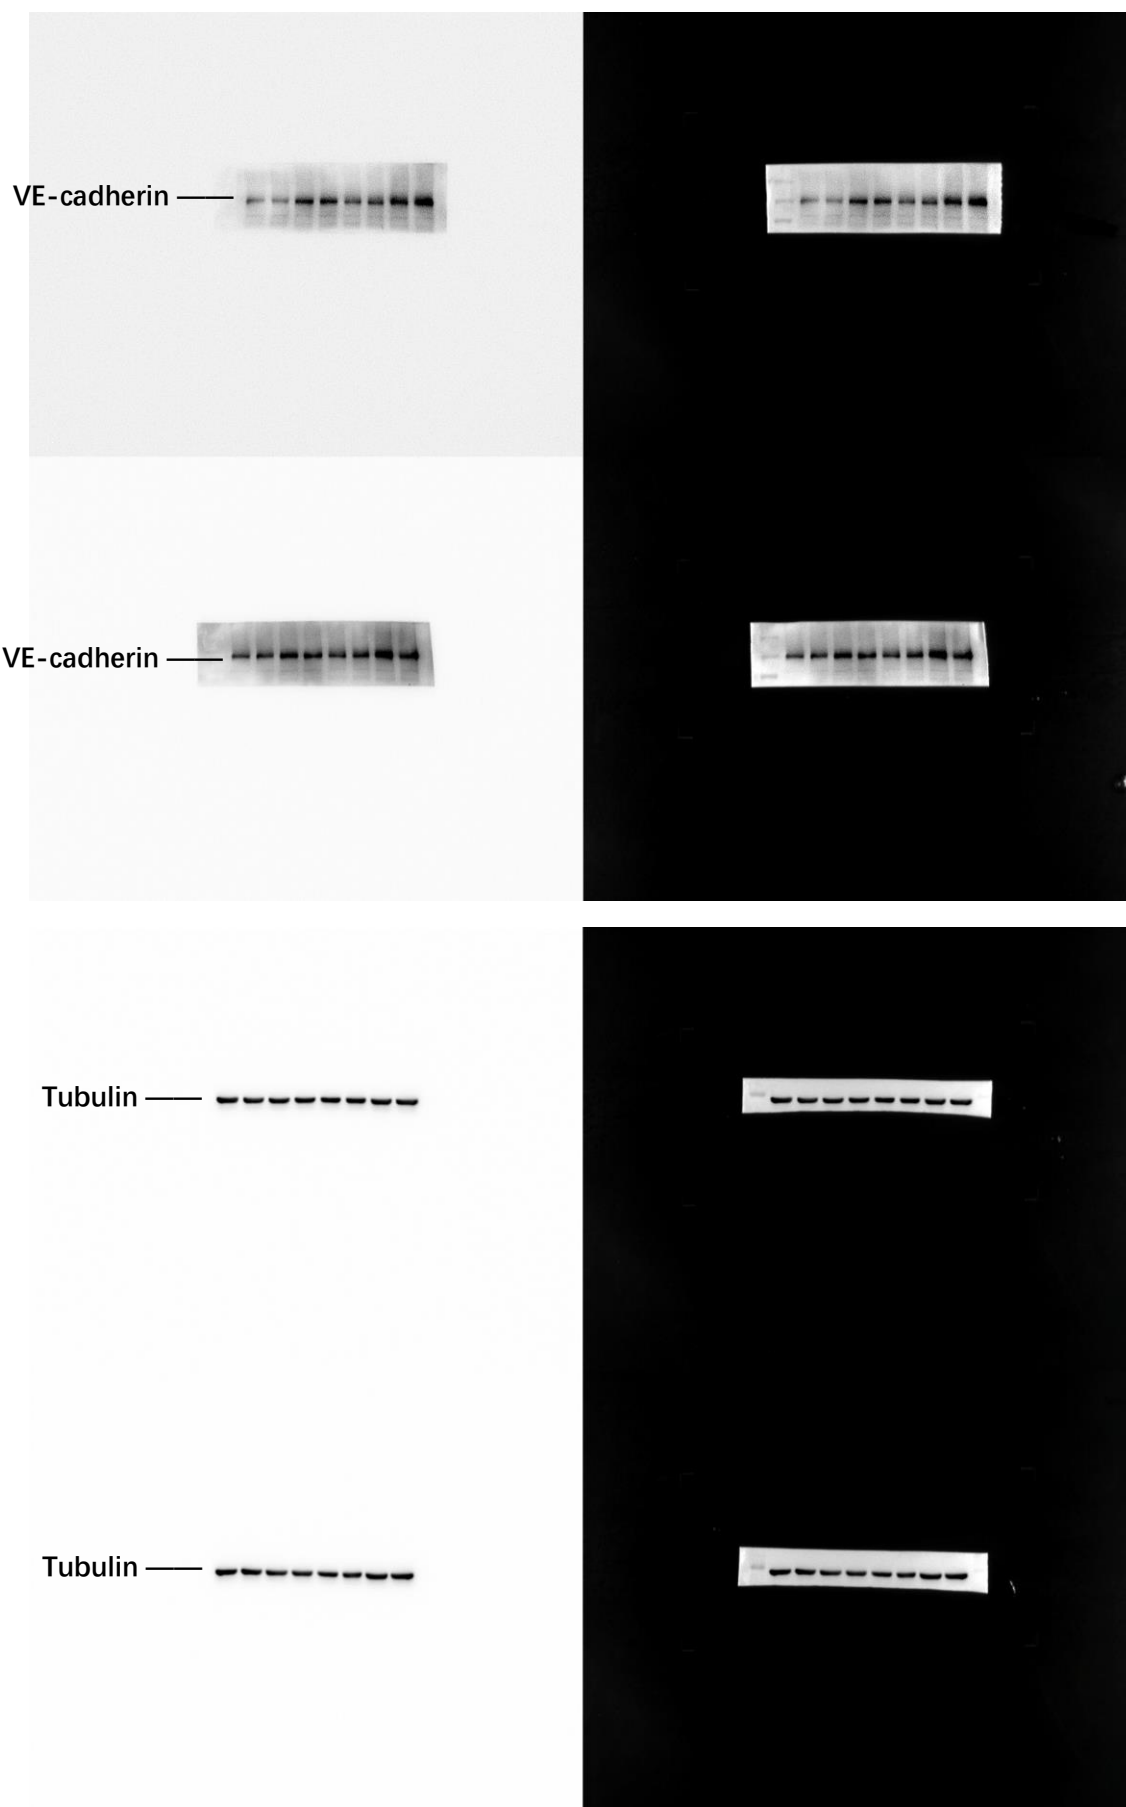

Figure 3I-p-p38/p38

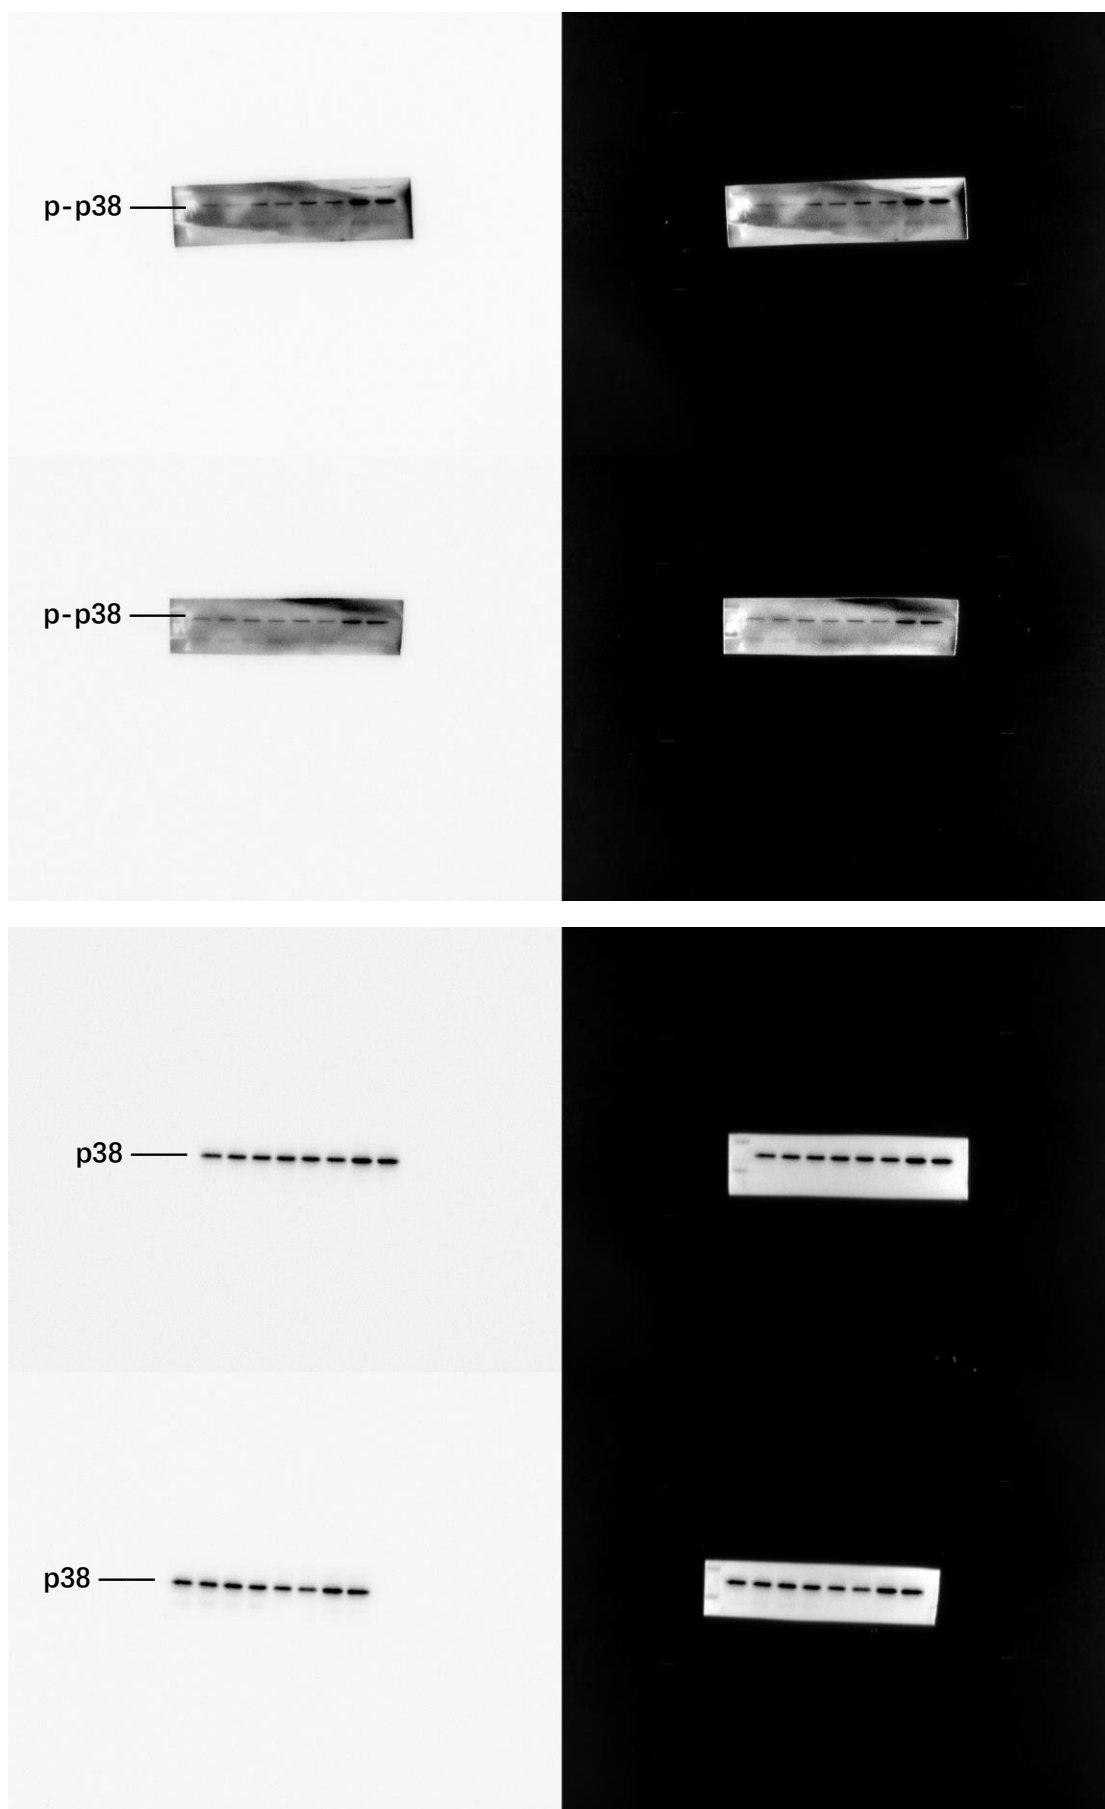

Figure 3J-p-AKT/ATK

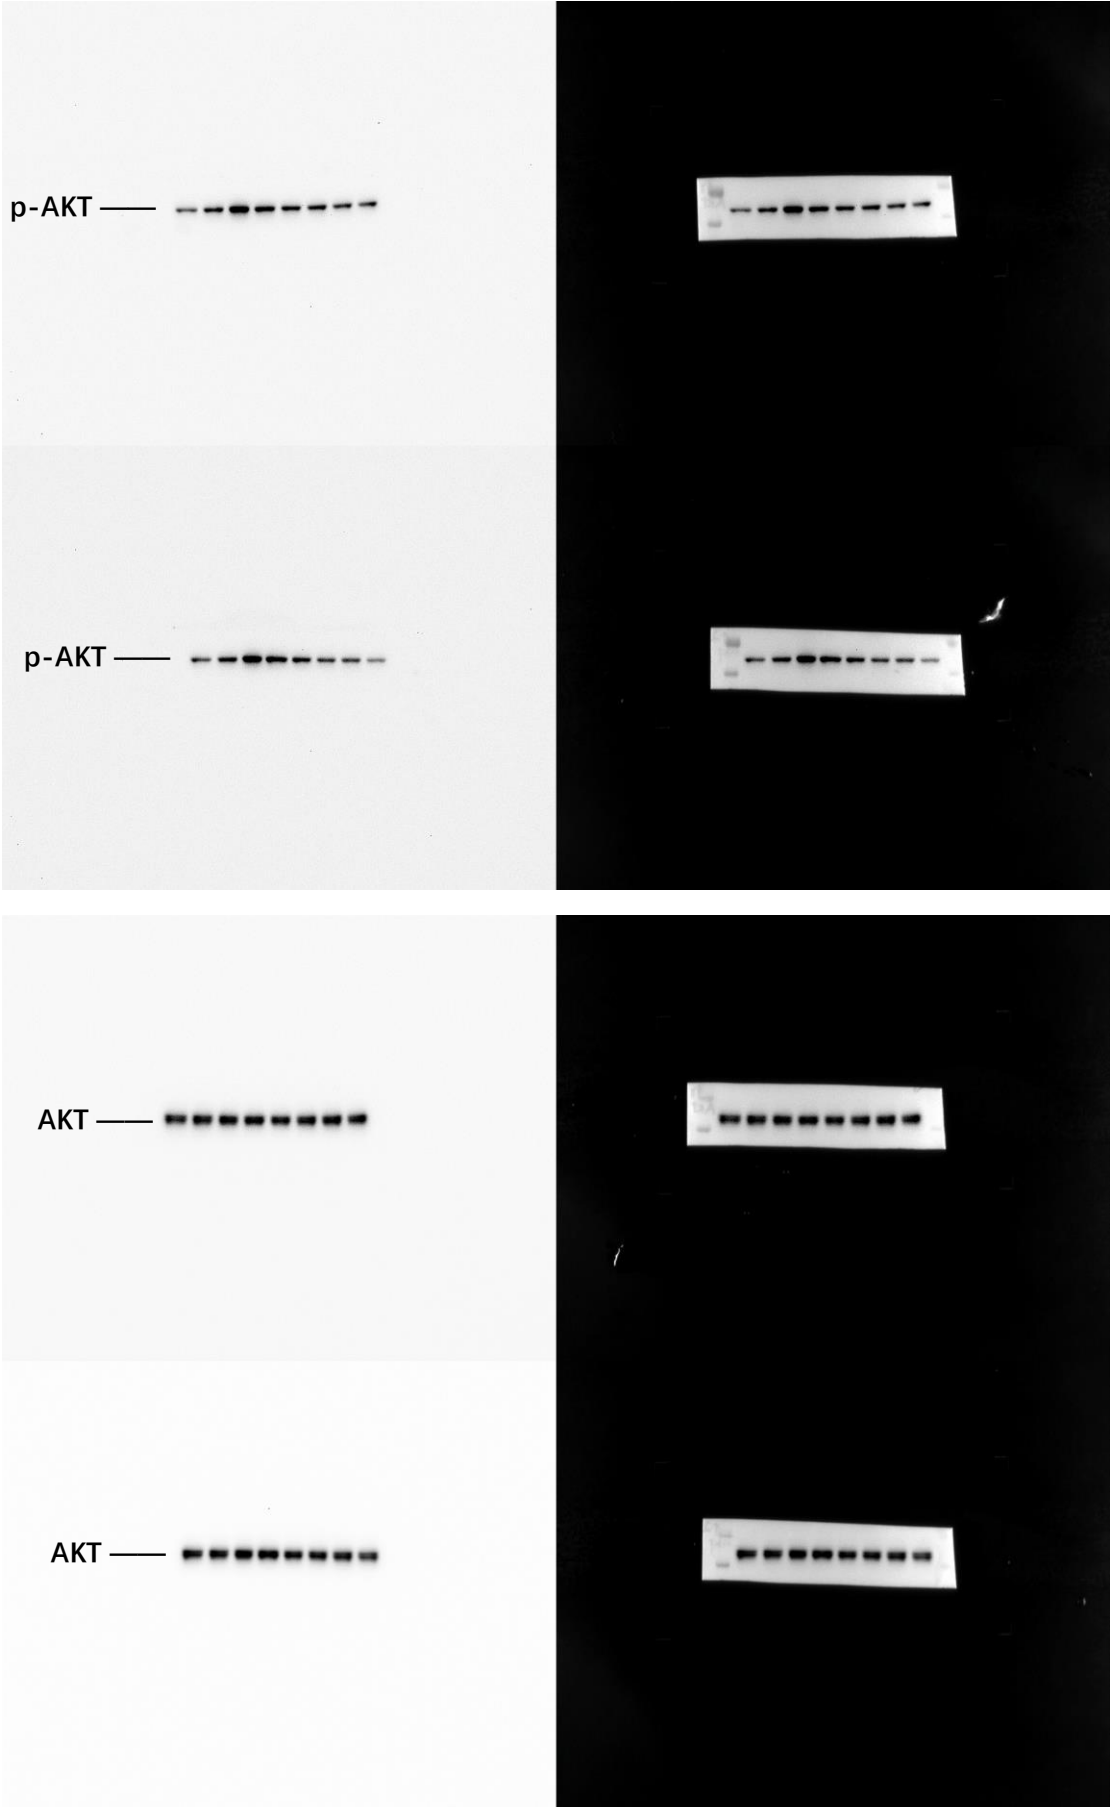

Figure 3J-p-ERK/ERK

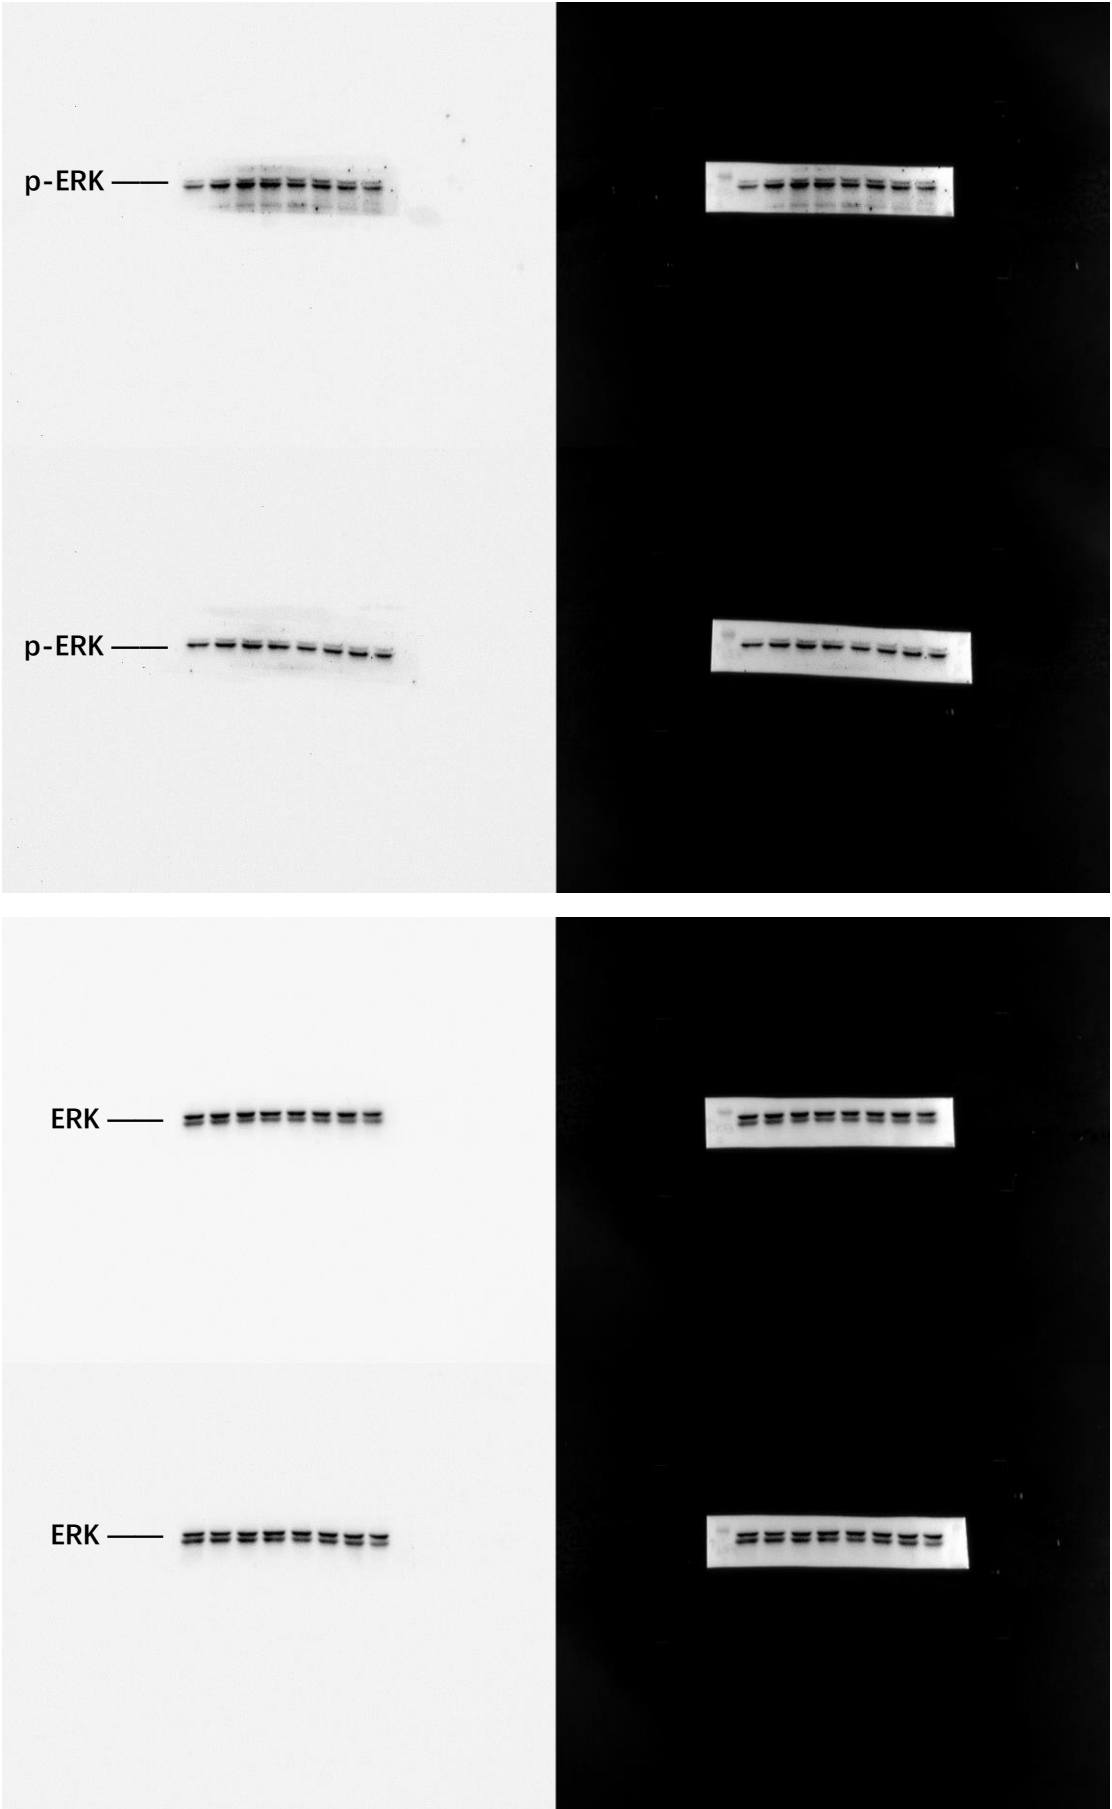

Figure 3J-Tubulin

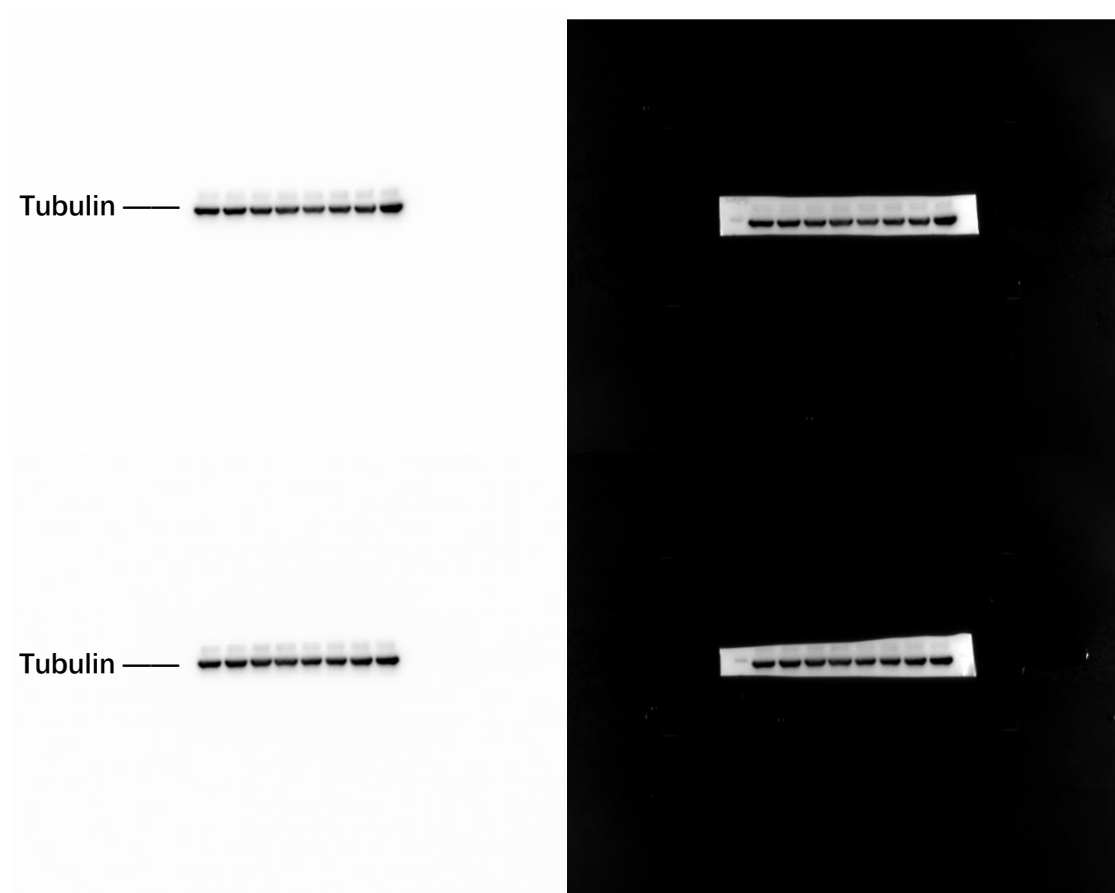

Supplement: fig3-data2 [file elife-96161-fig3-data2-v1.zip]
