# Supplementary material for: Neurons enhance blood–brain barrier function via upregulating claudin-5 and VE-cadherin expression due to glial cell line-derived neurotrophic factor secretion
Source: eLife journal article supplement (doi:10.7554/elife.96161), 2024-05-29

Figure 4A-p-FOXO1/FOXO1

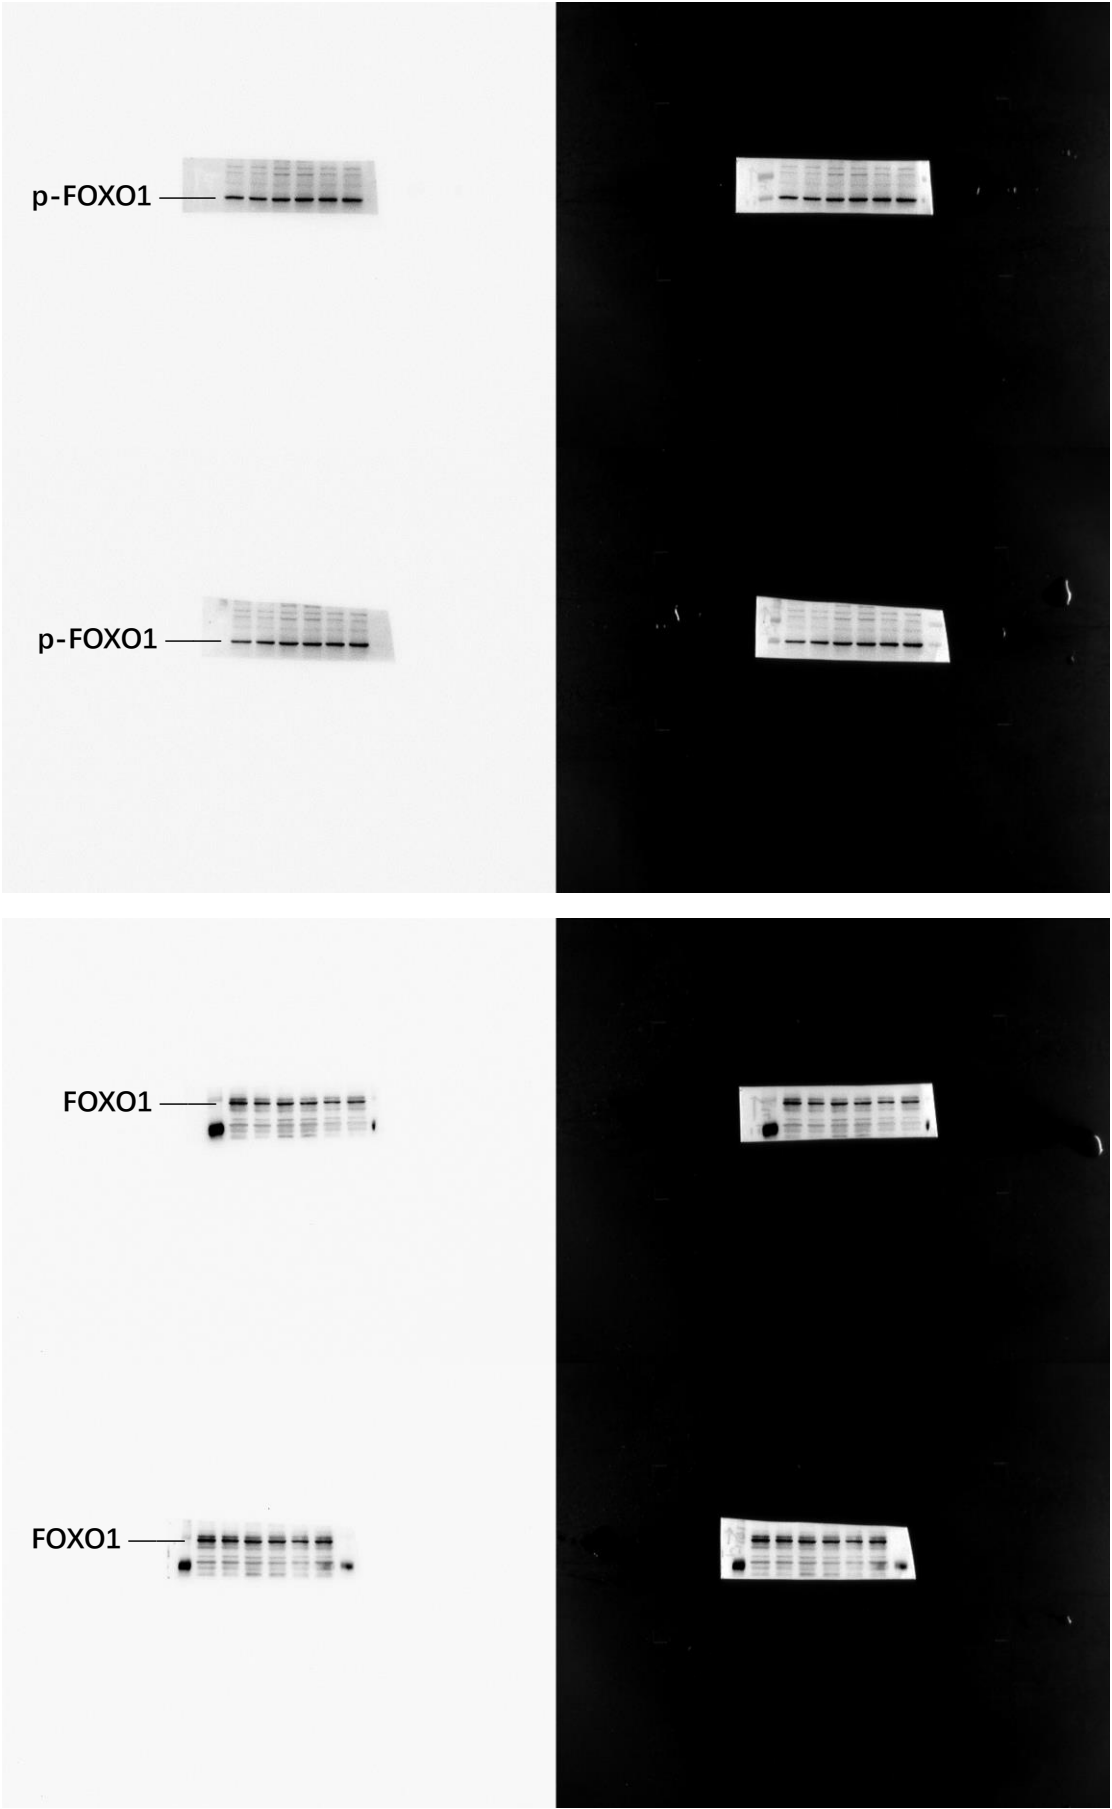

$\beta$ -actin —

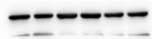

$\beta$ -actin —

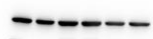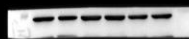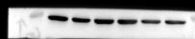

Figure 4B-p-FOXO1, FOXO1, GAPDH

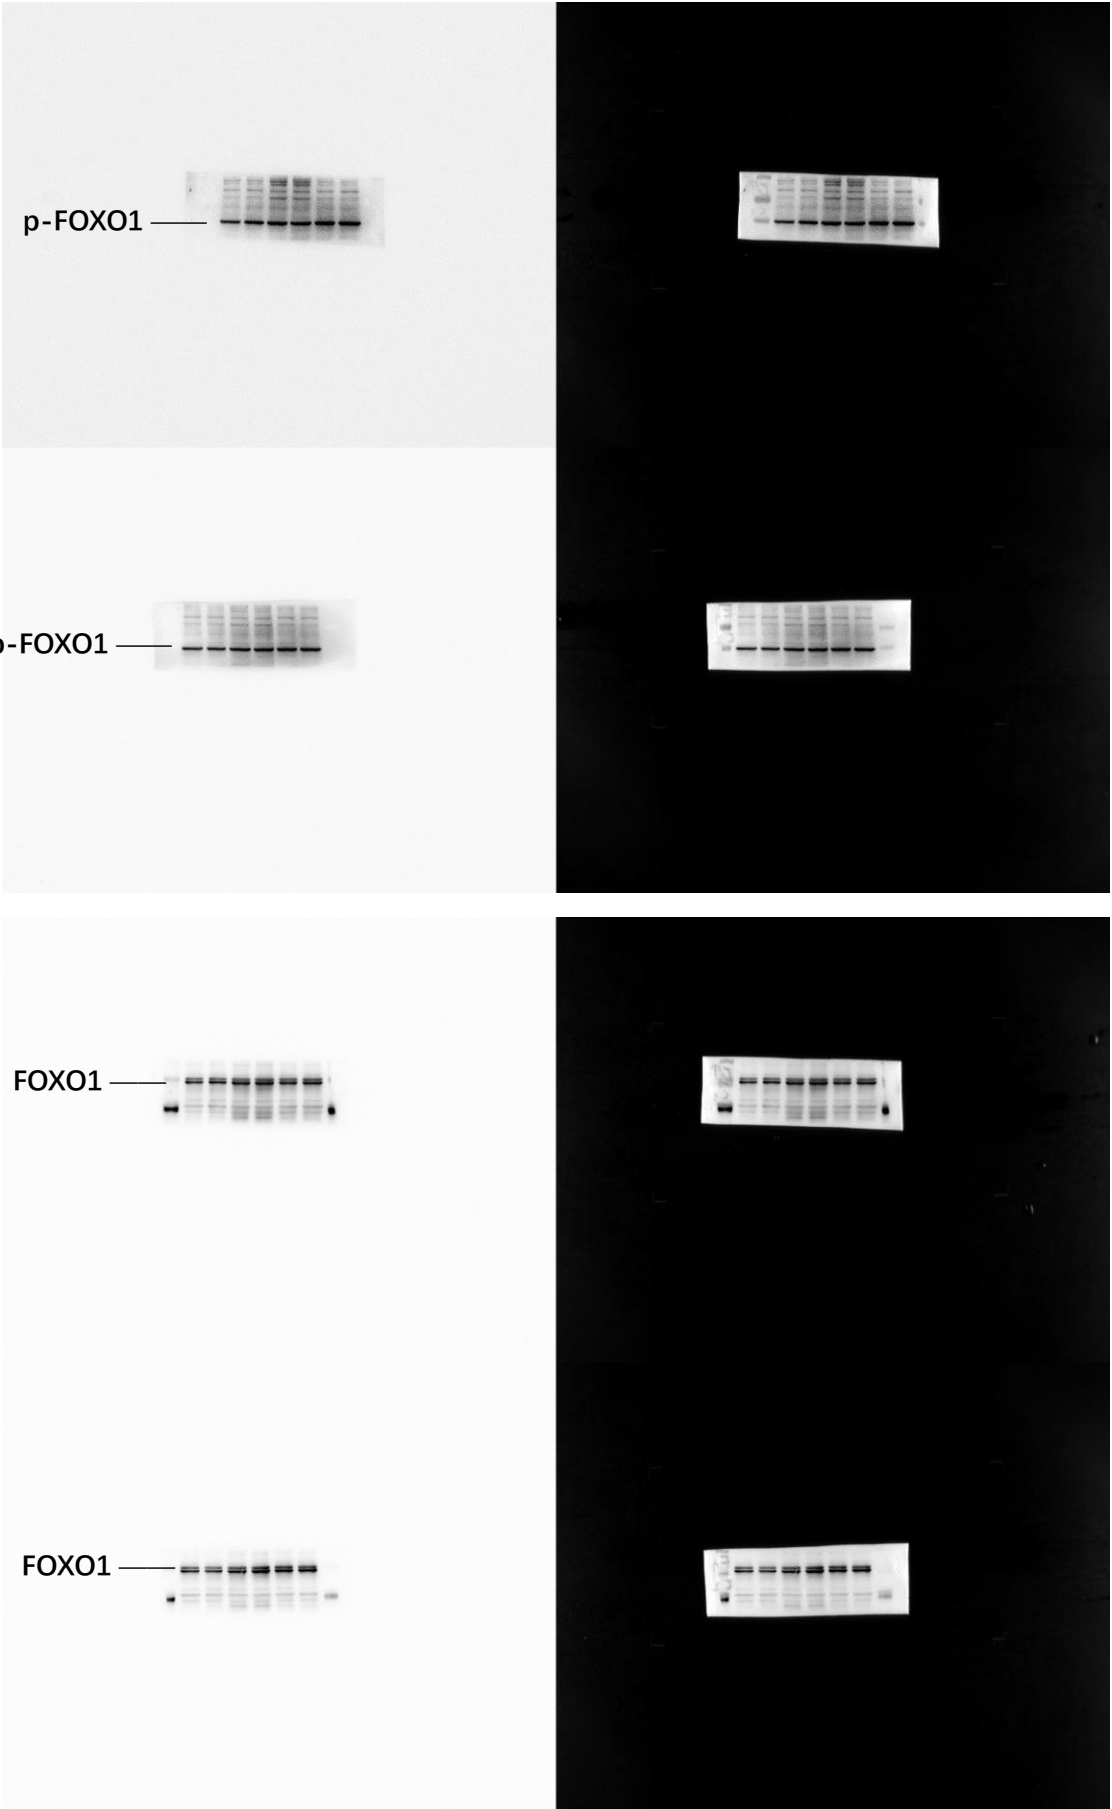

GAPDH ———

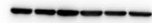

GAPDH ———

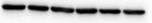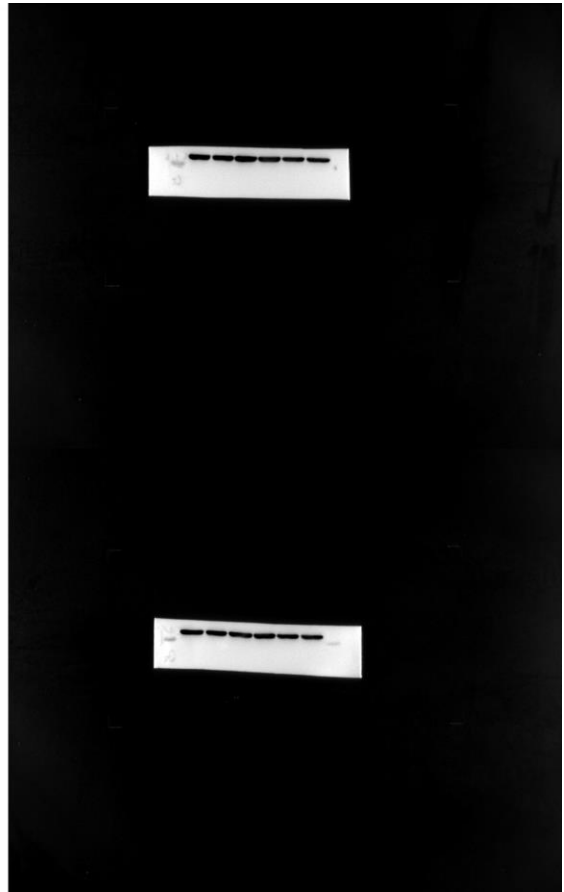

Figure 4B- FOXO1, Lamin B

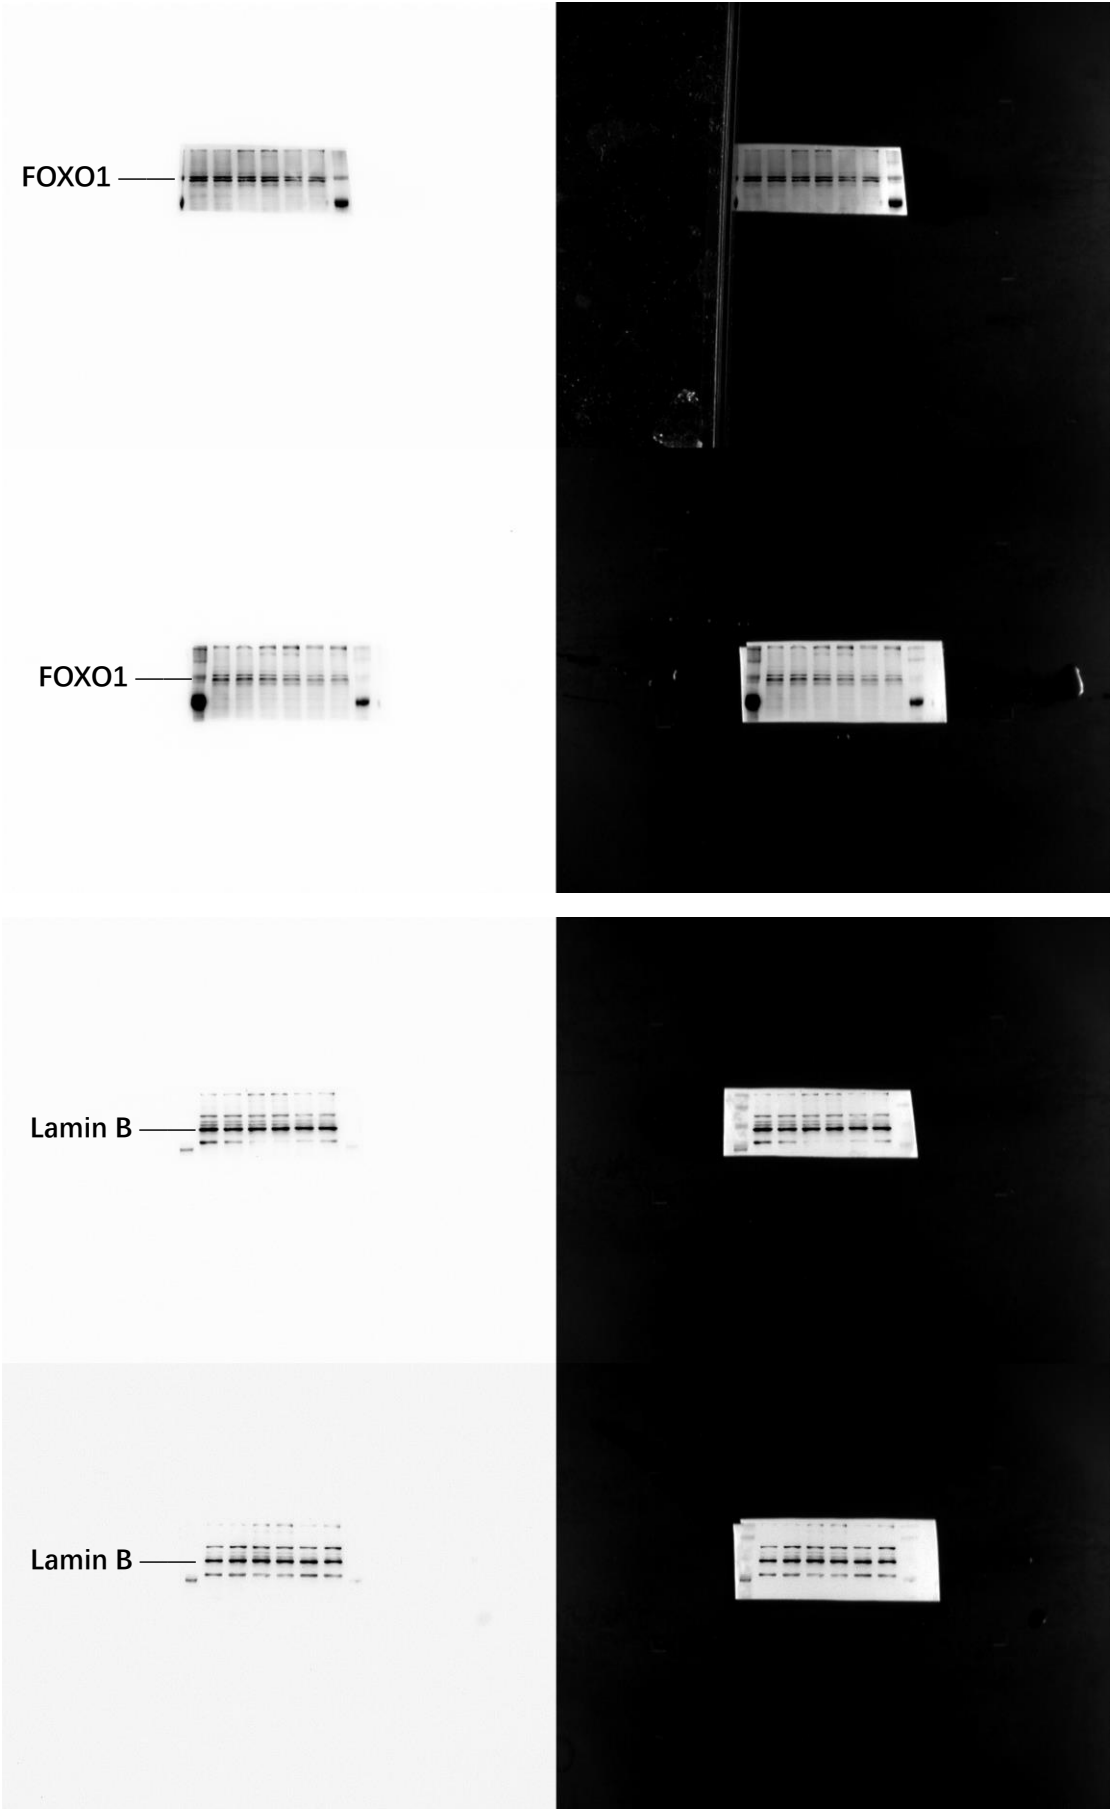

Figure 4C- FOXO1,  $\beta$ -actin

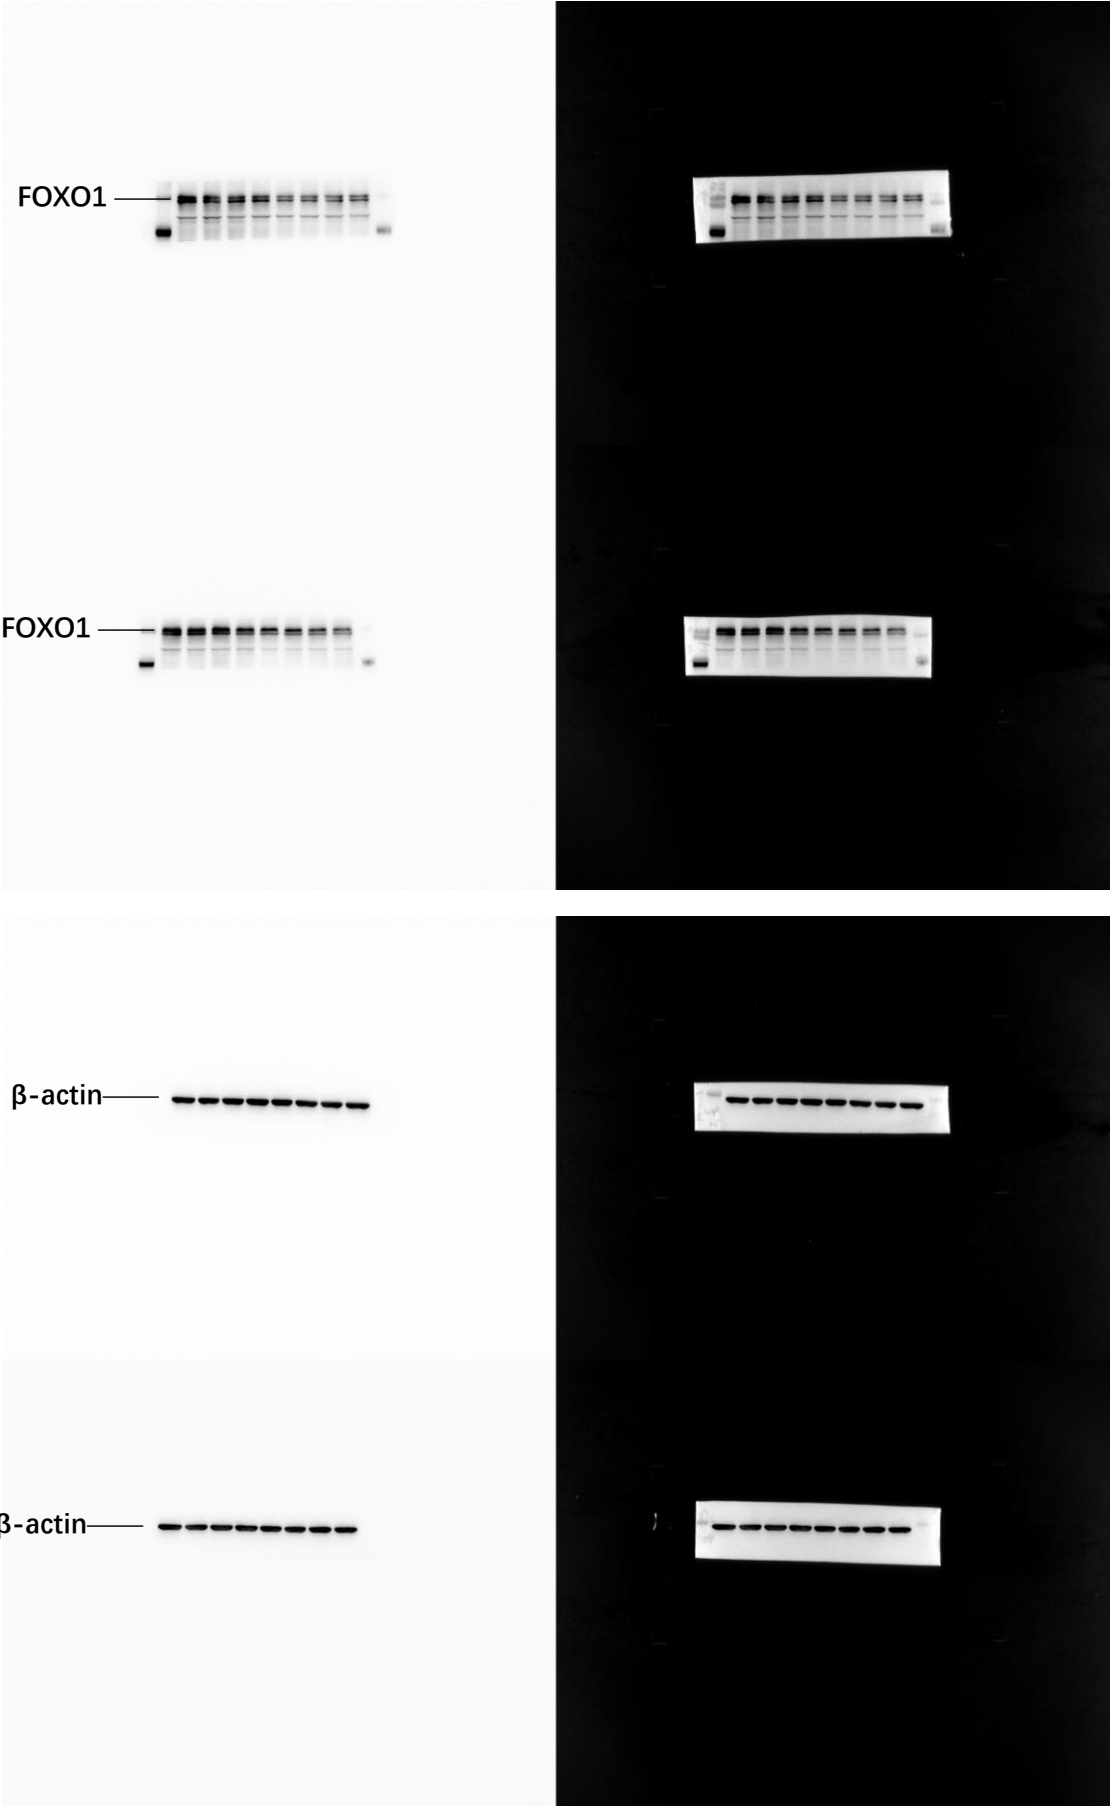

Figure 4C- FOXO1, Lamin B

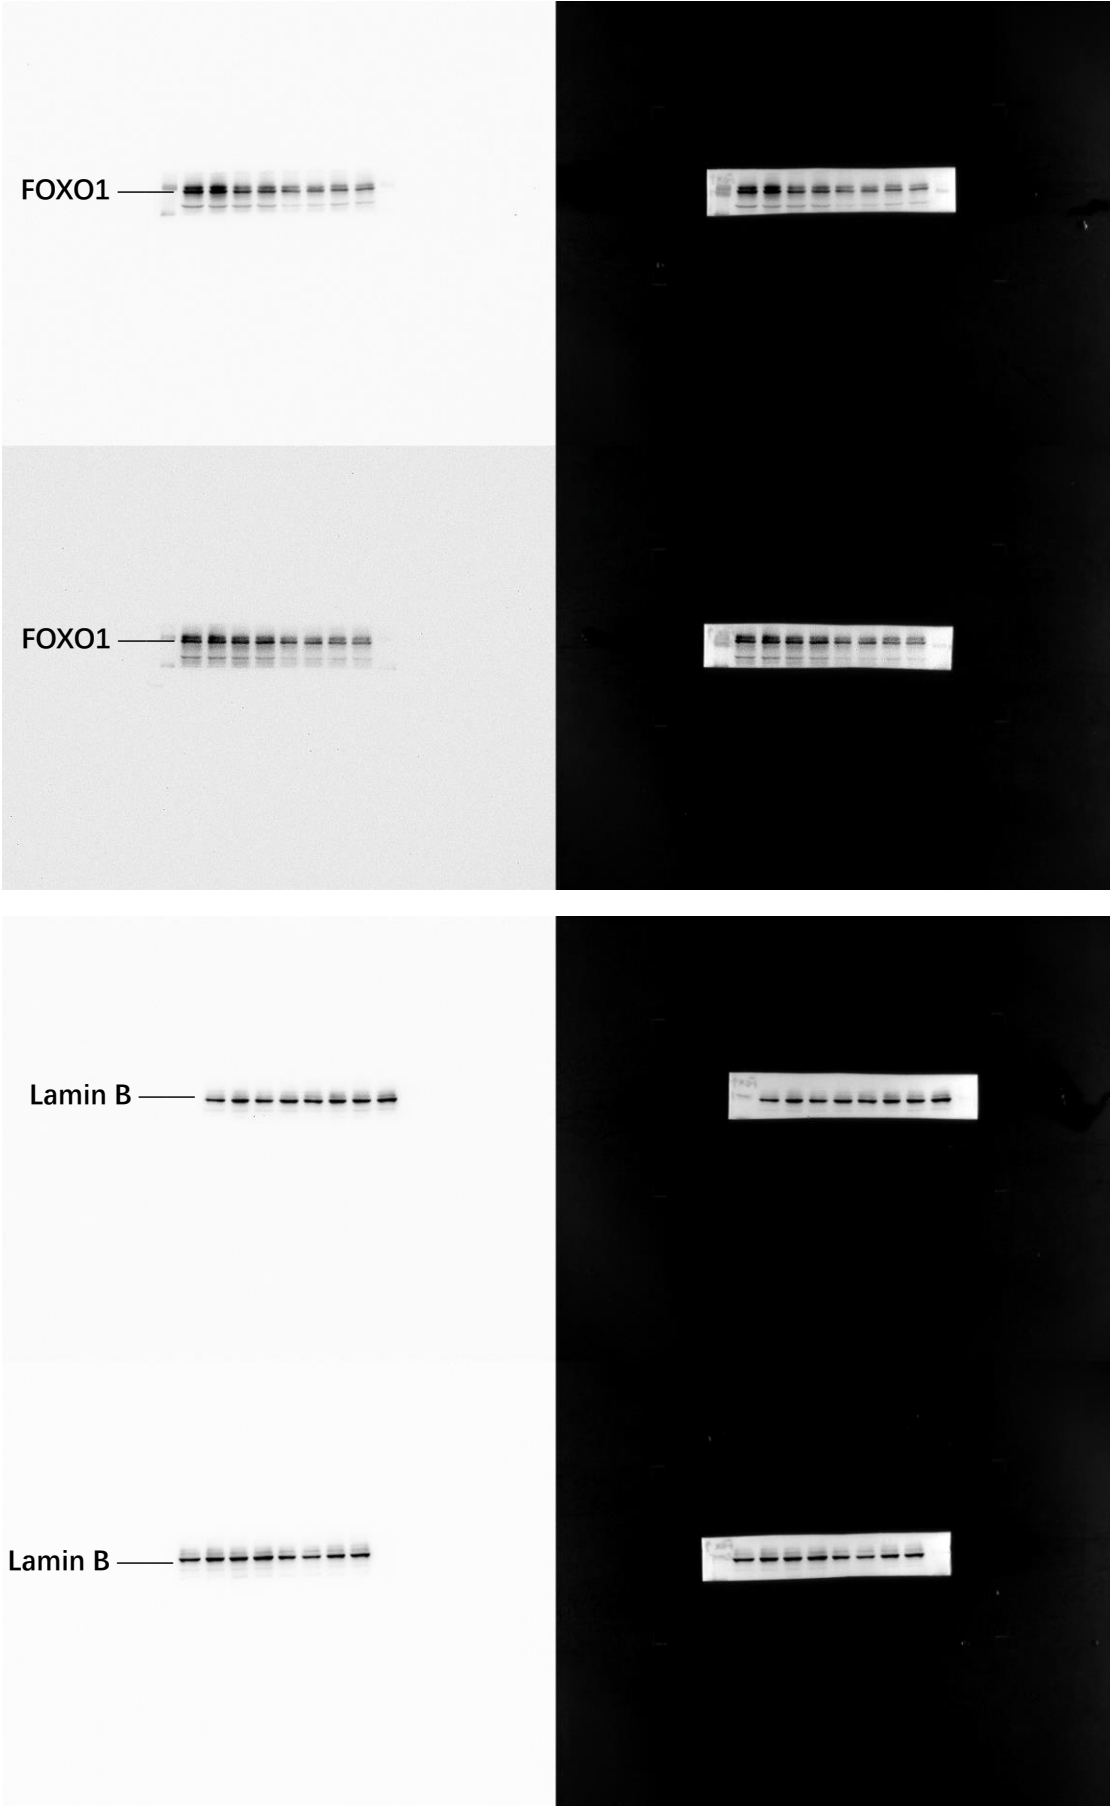

Figure 4D-Claudin-5

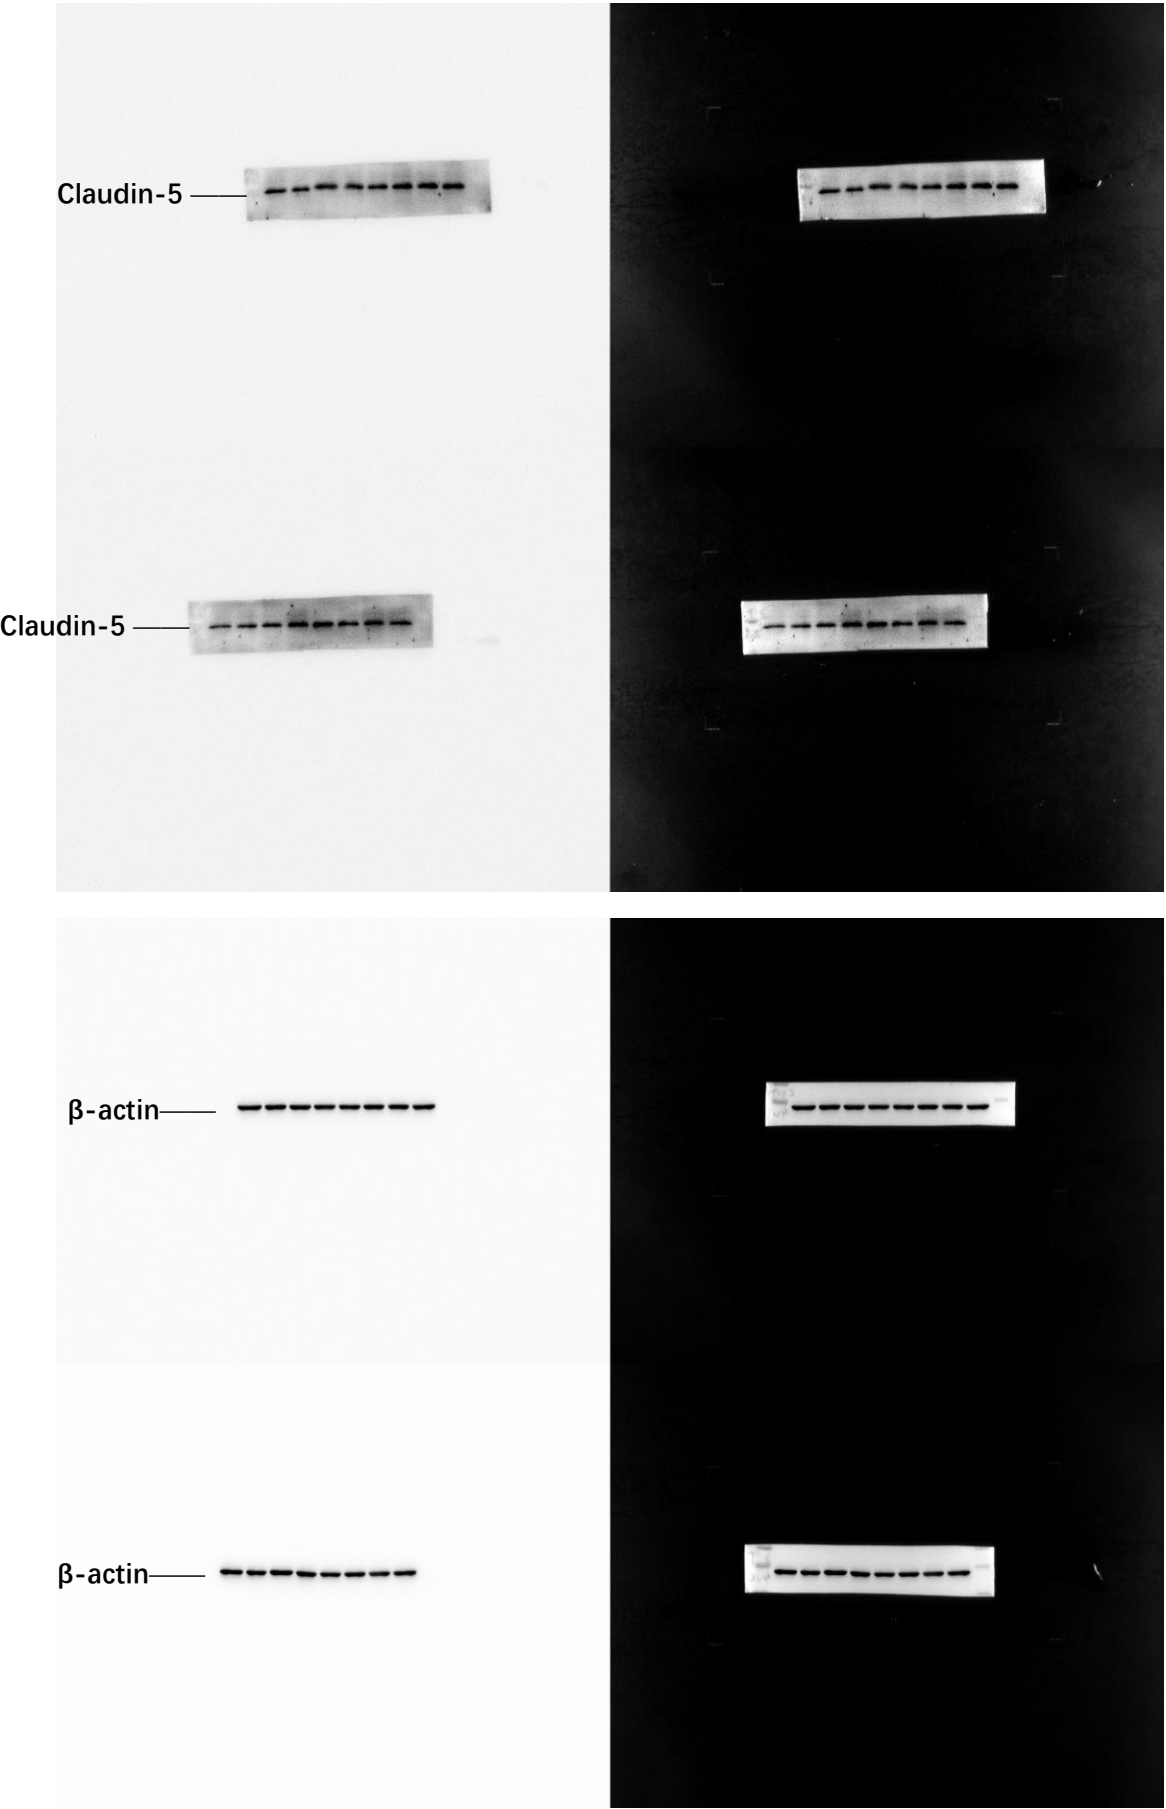

Figure 4D-VE-cadherin

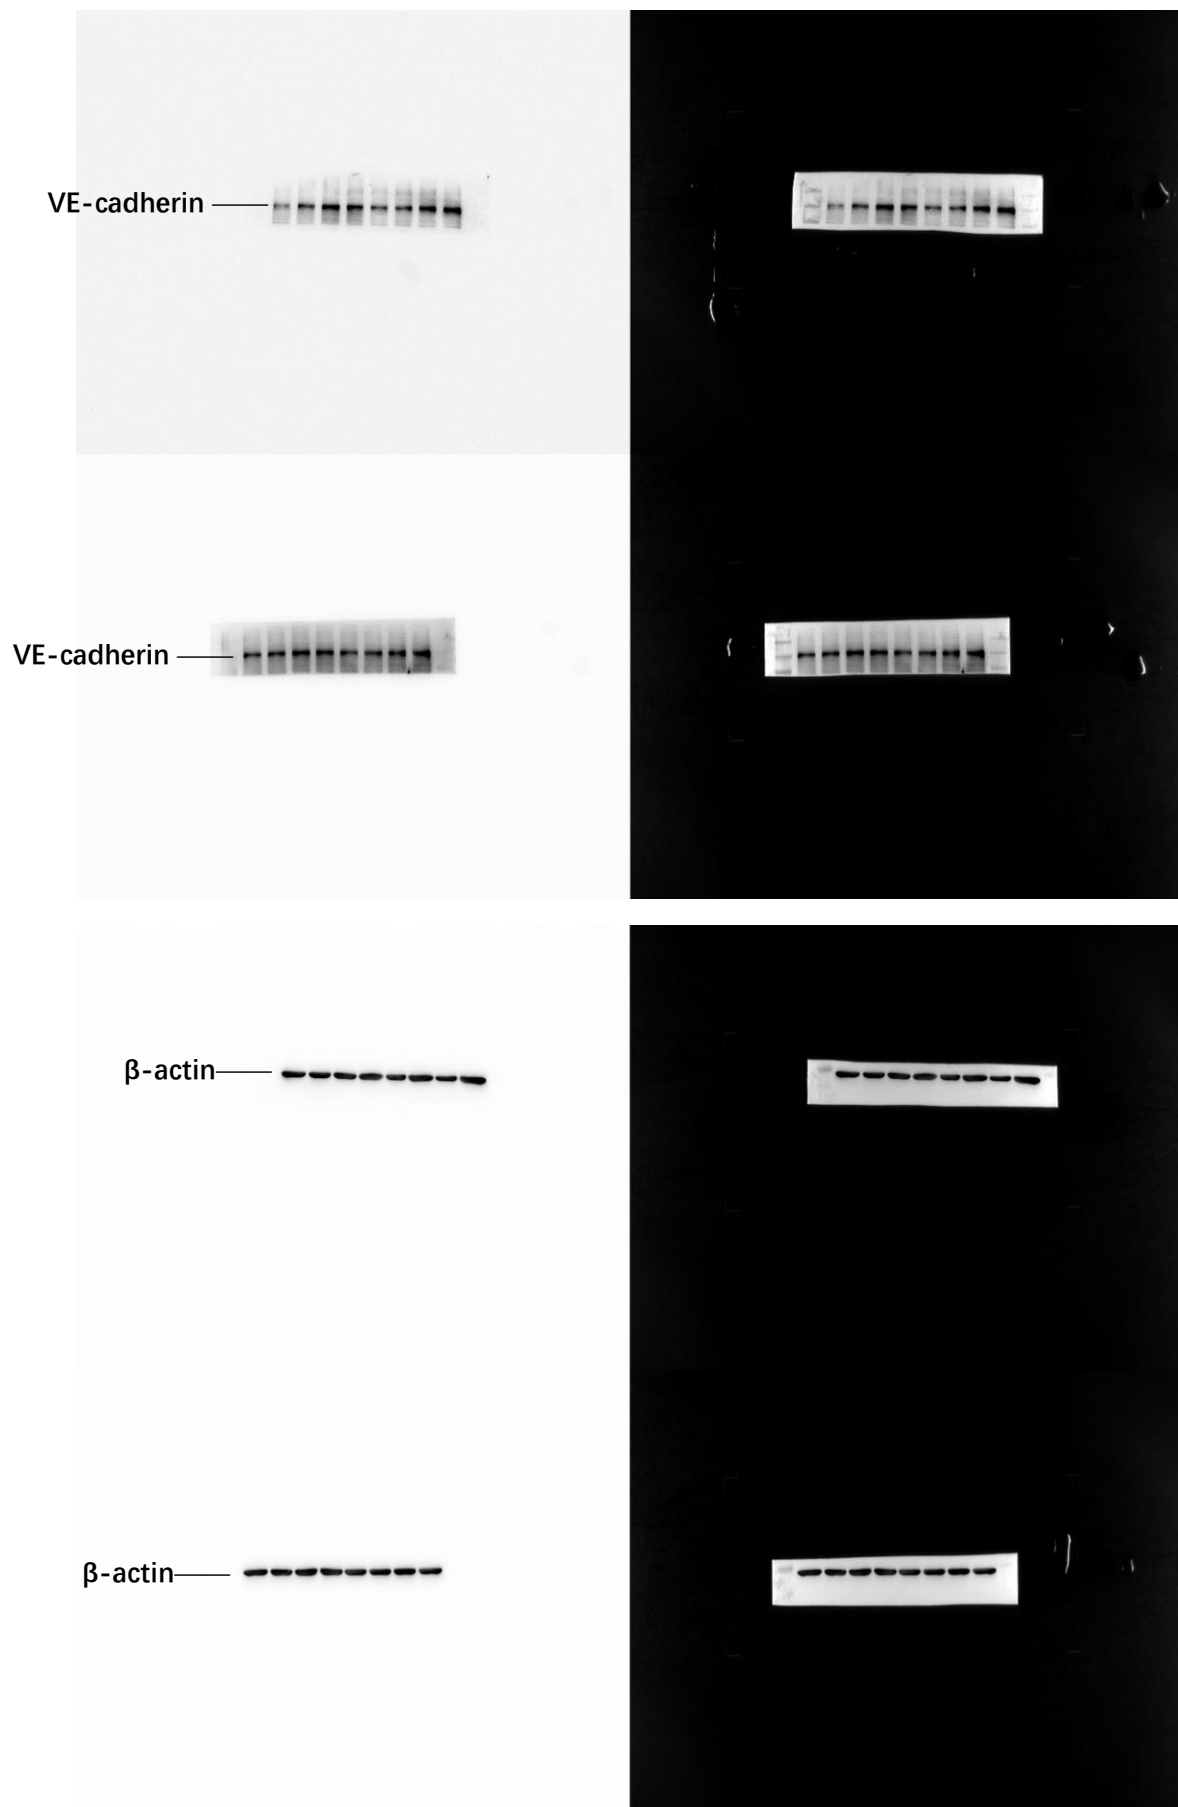

Figure 4E-Claudin-5

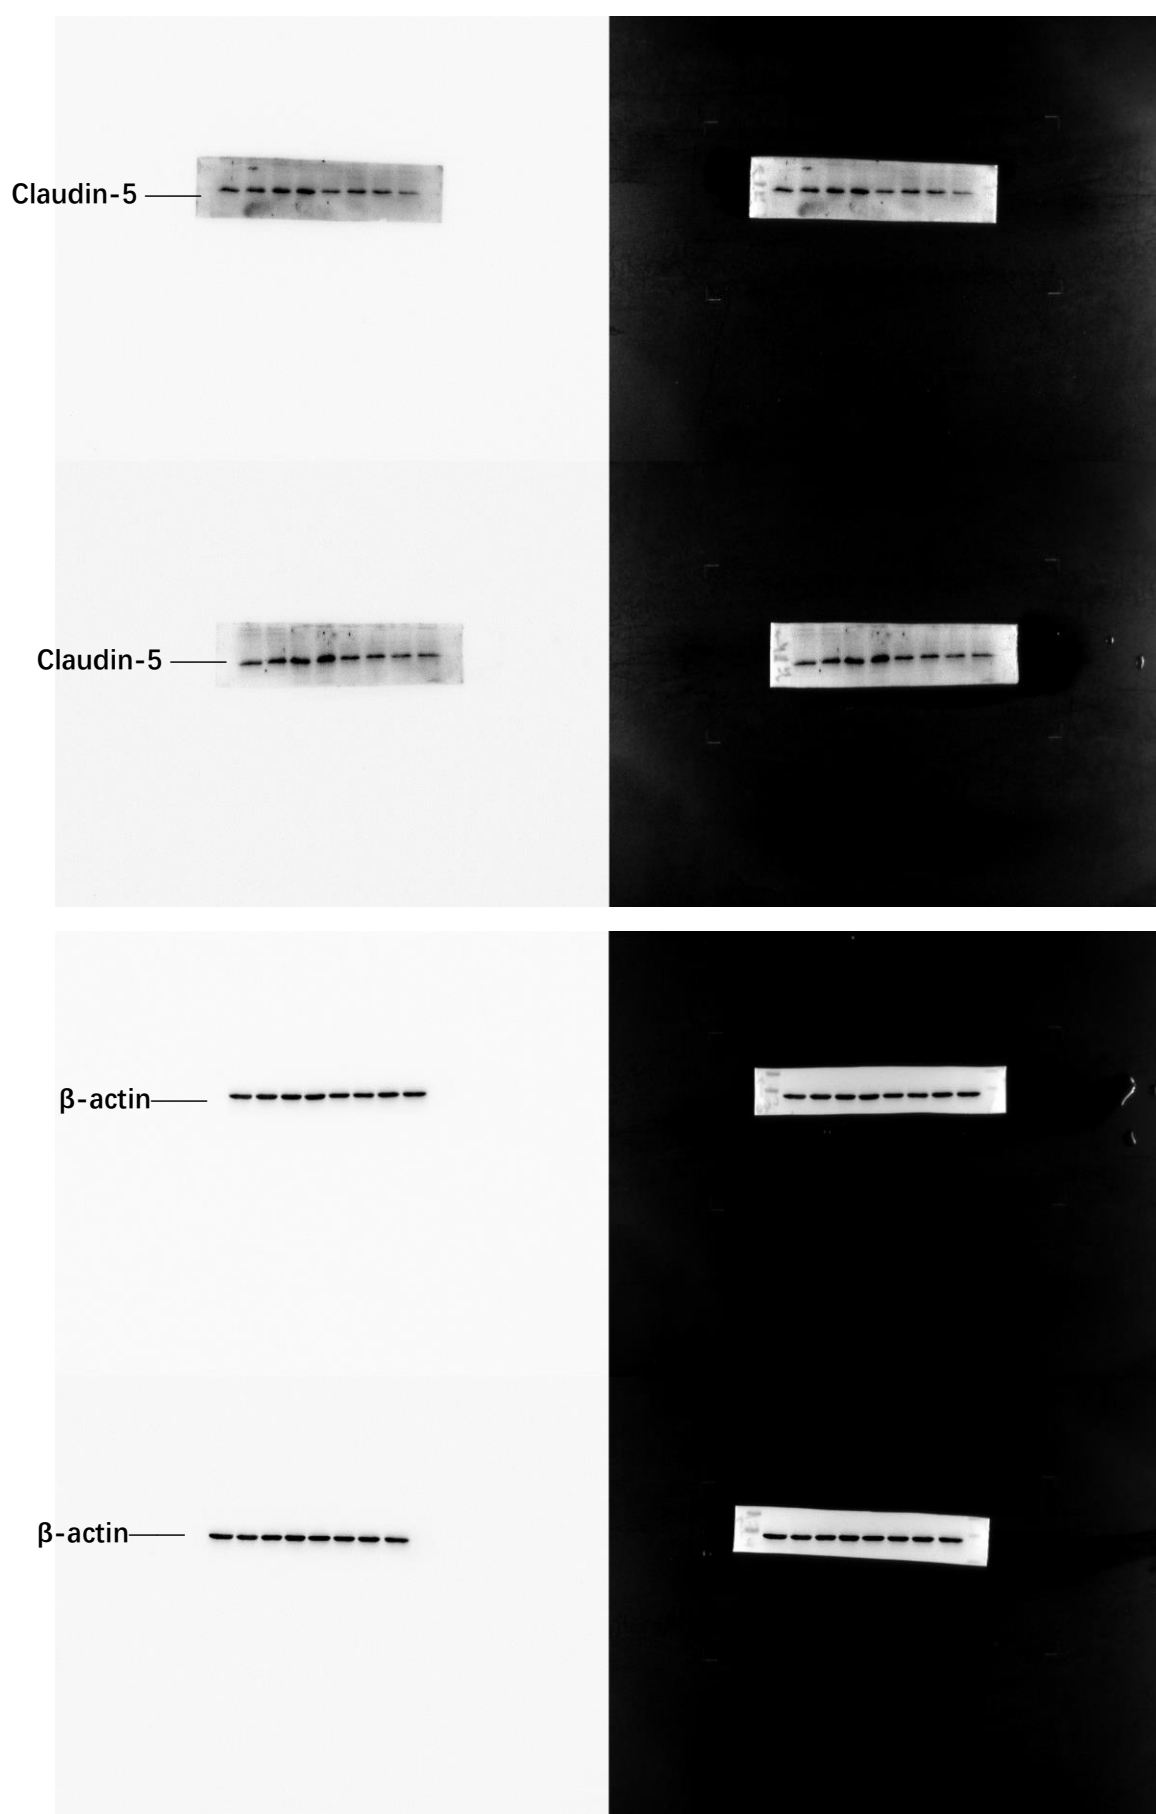

Figure 4E-FOXO1,  $\beta$ -actin

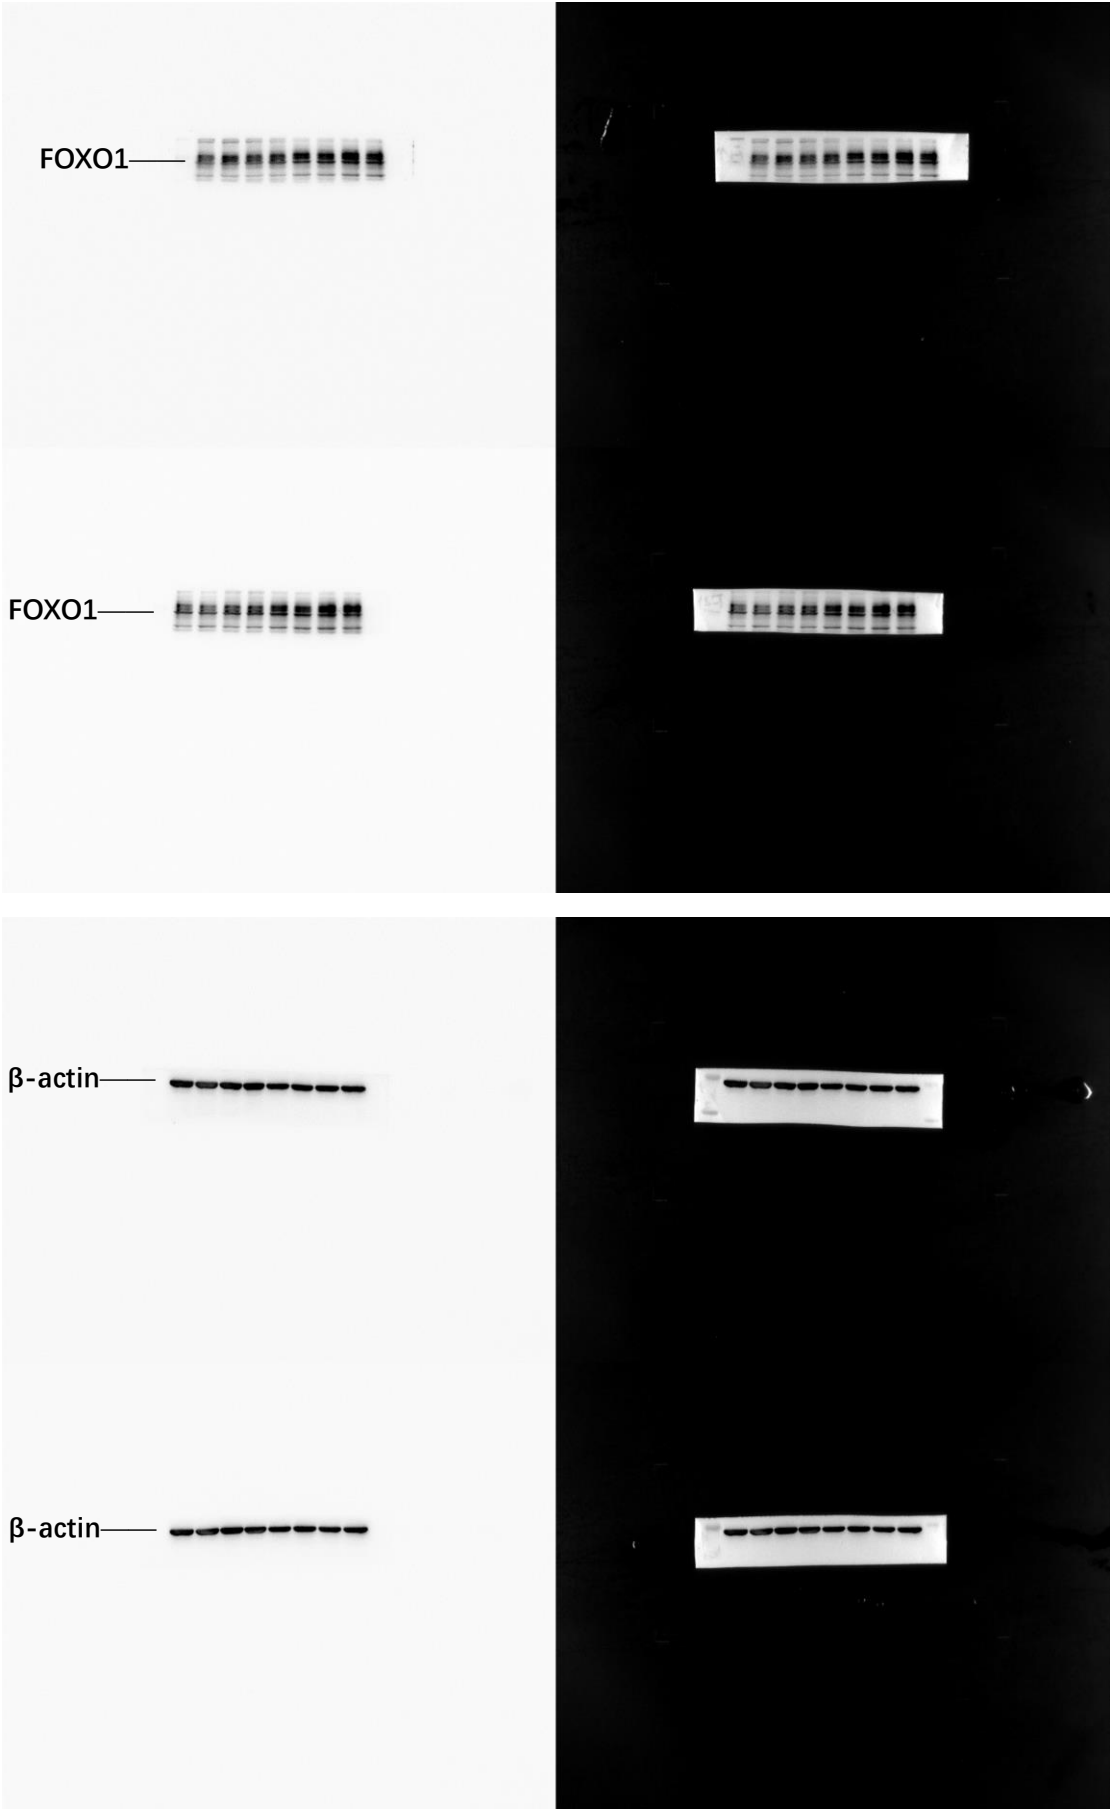

Figure 4E-FOXO1, Lamin B

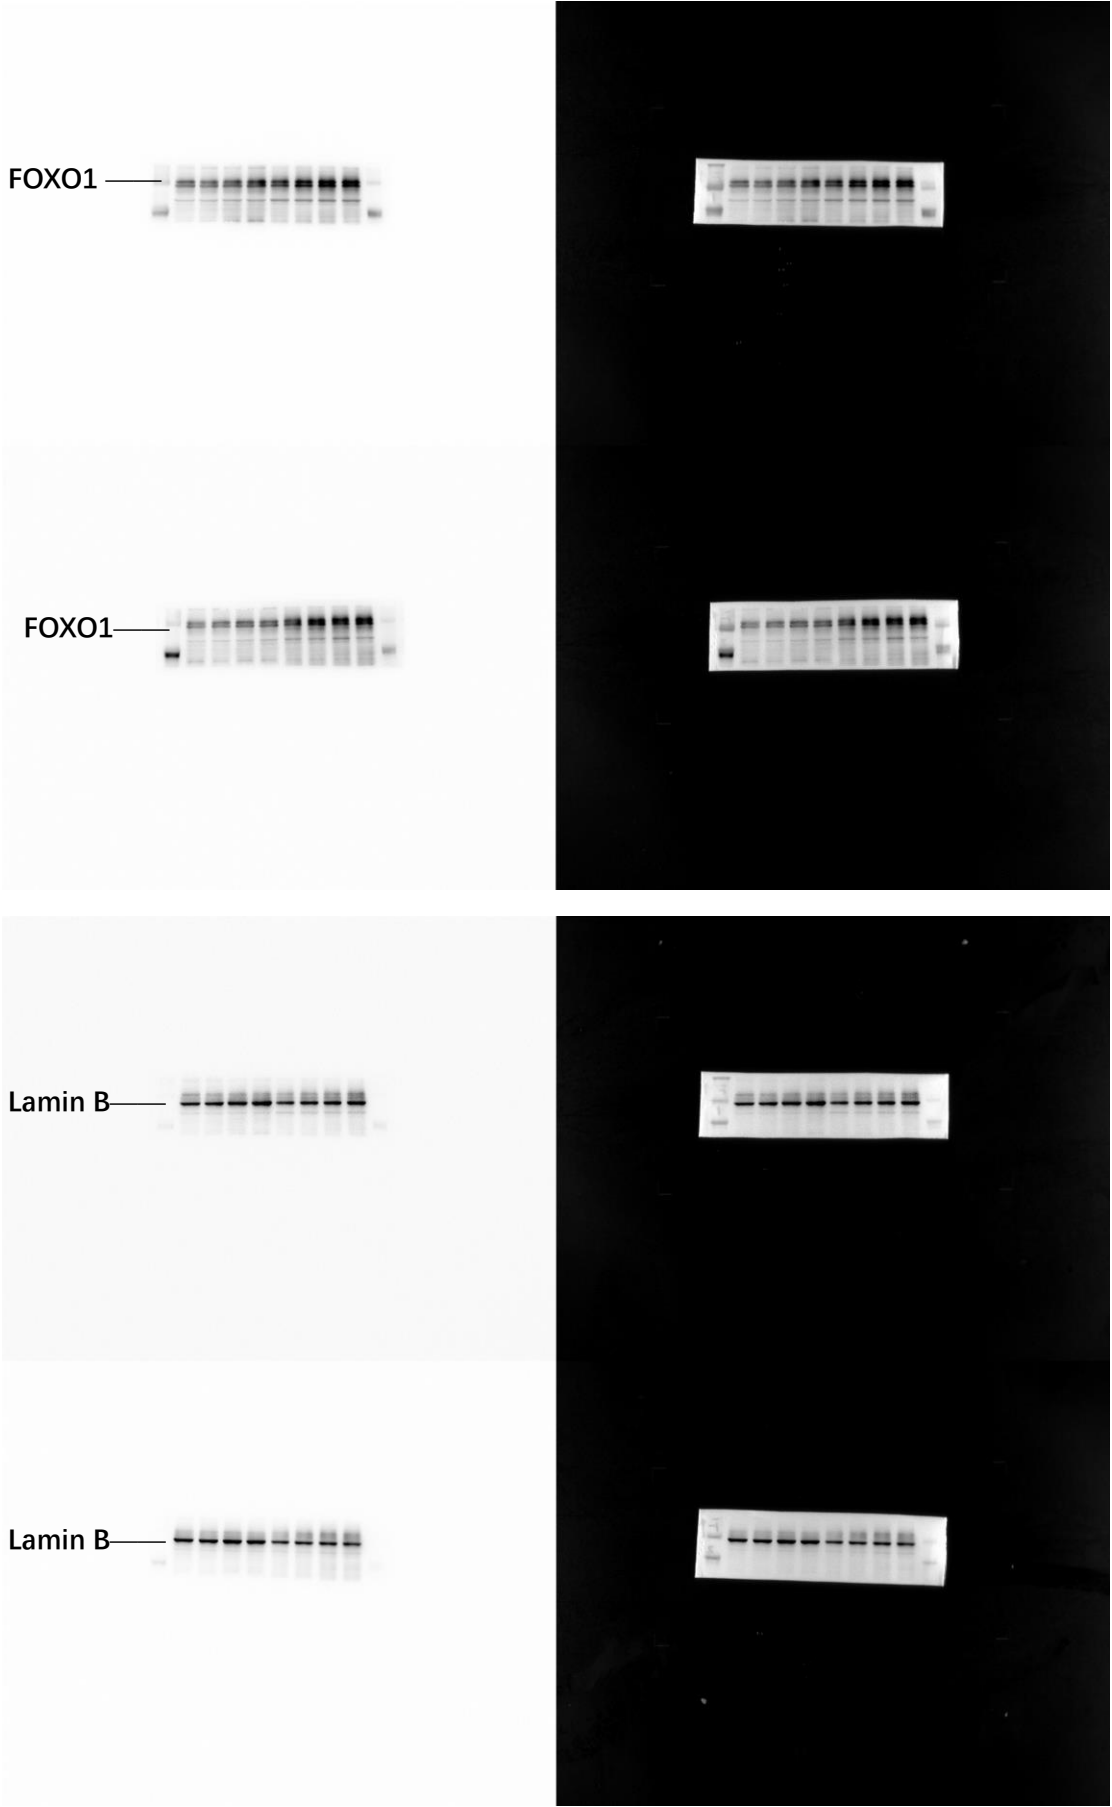

Figure 4F-p-FOXO1/FOXO1

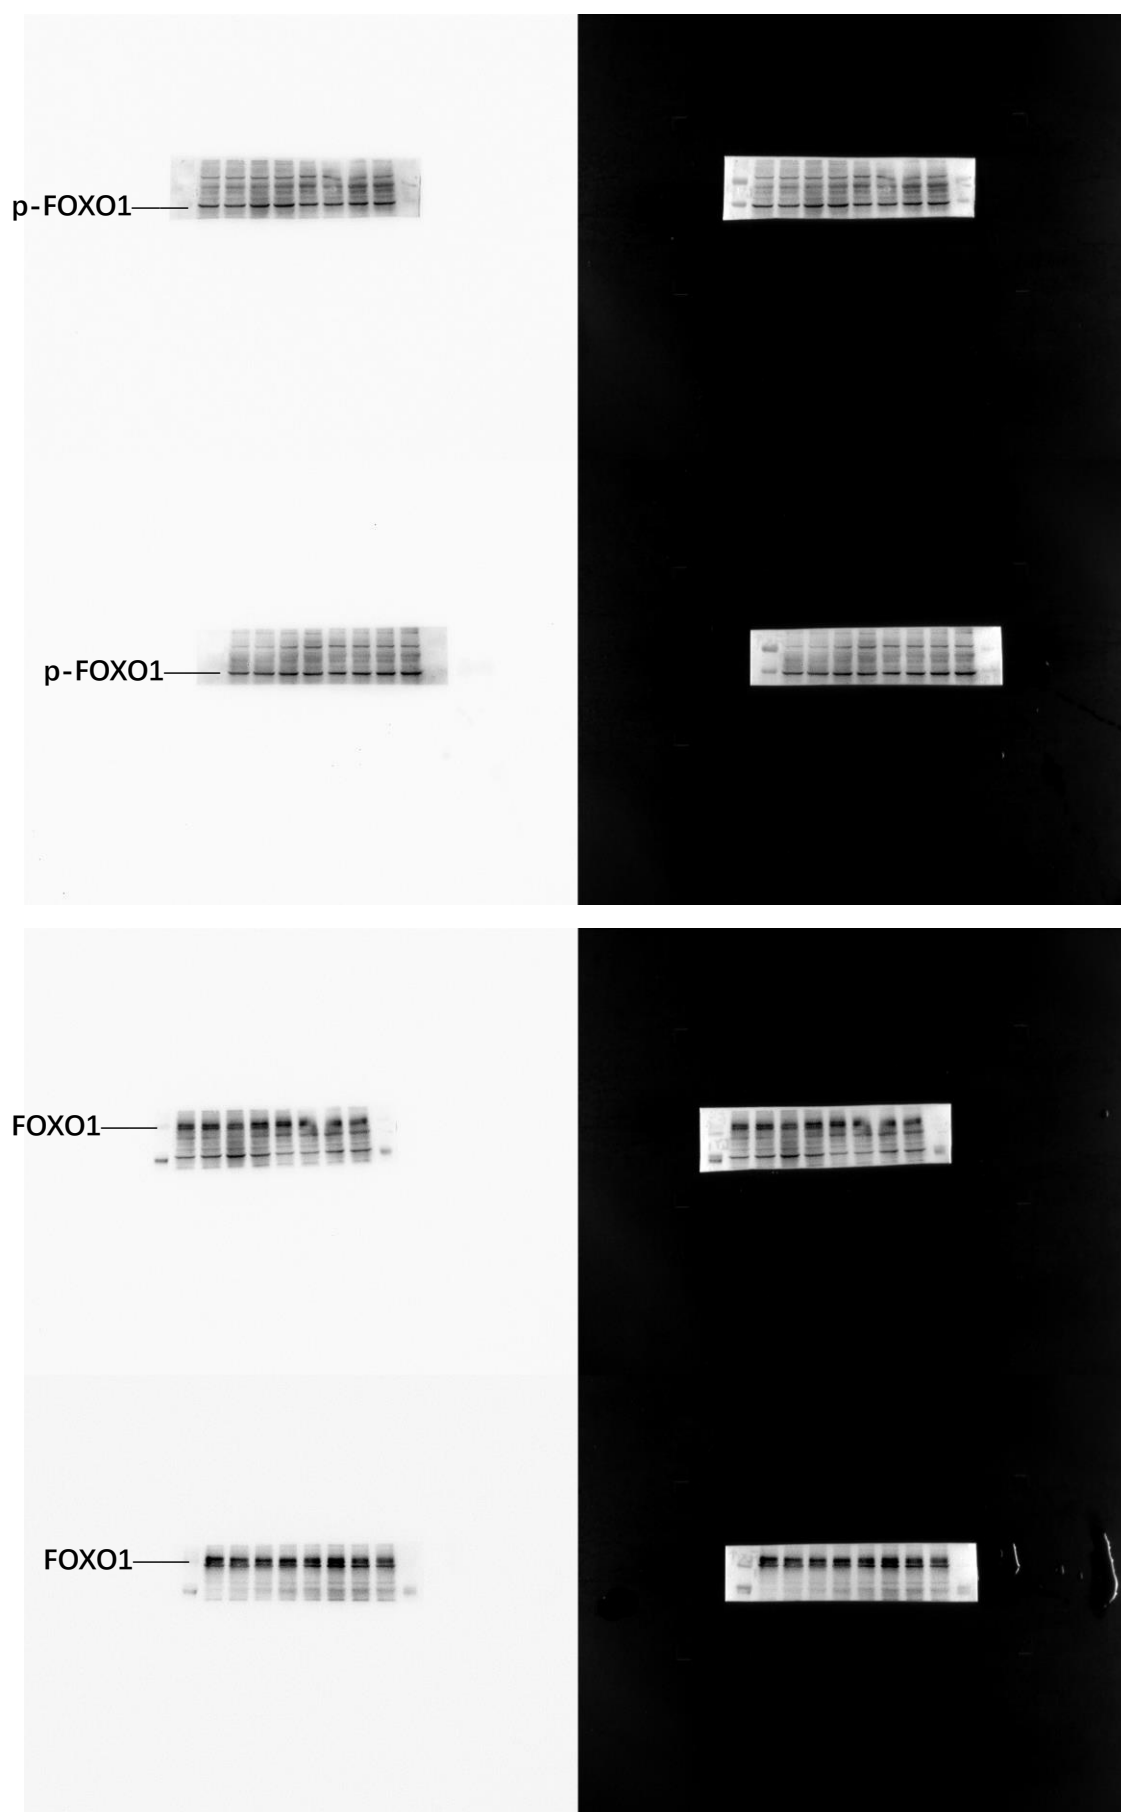

$\beta$ -actin

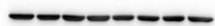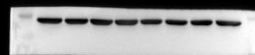

$\beta$ -actin

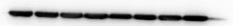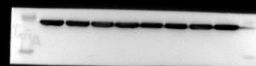

Figure 4F-p-FOXO1, FOXO1, GAPDH

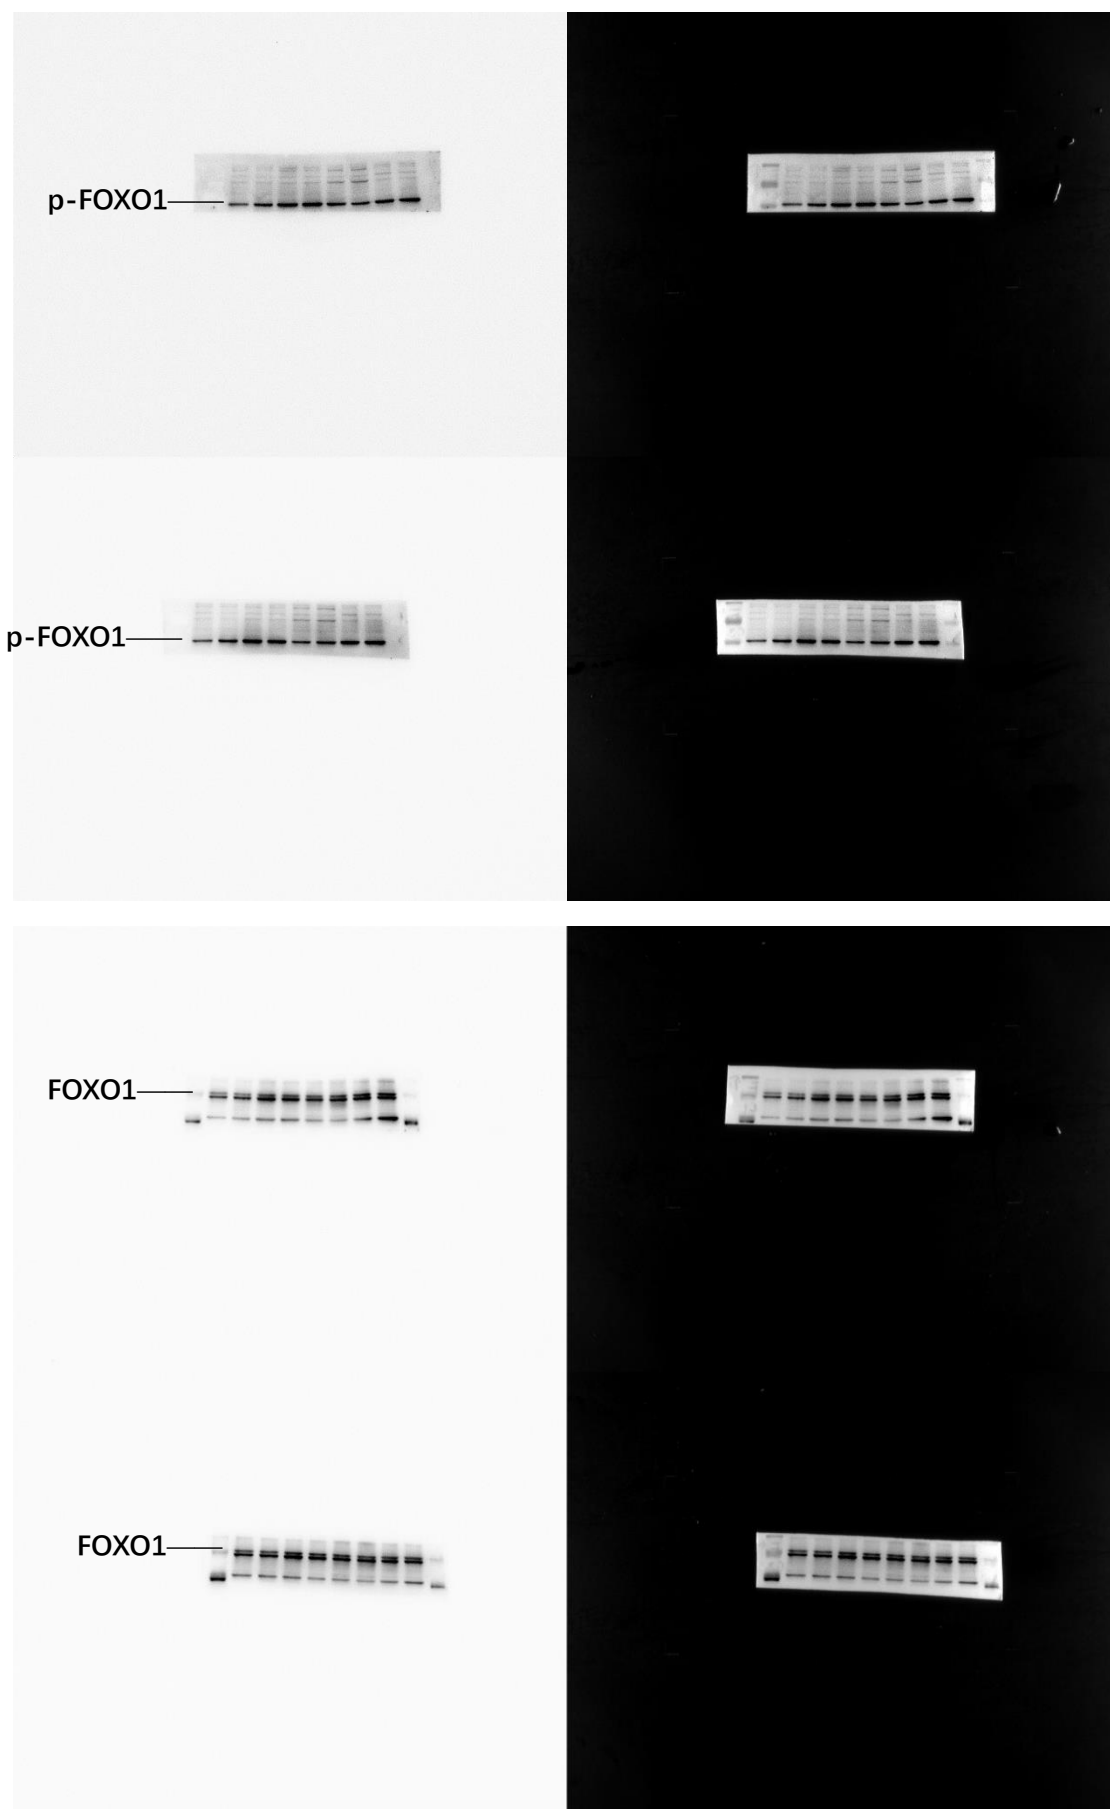

GAPDH——

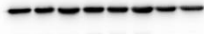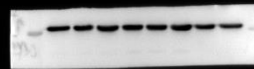

GAPDH——

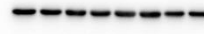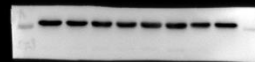

Figure 4F-FOXO1, Lamin B

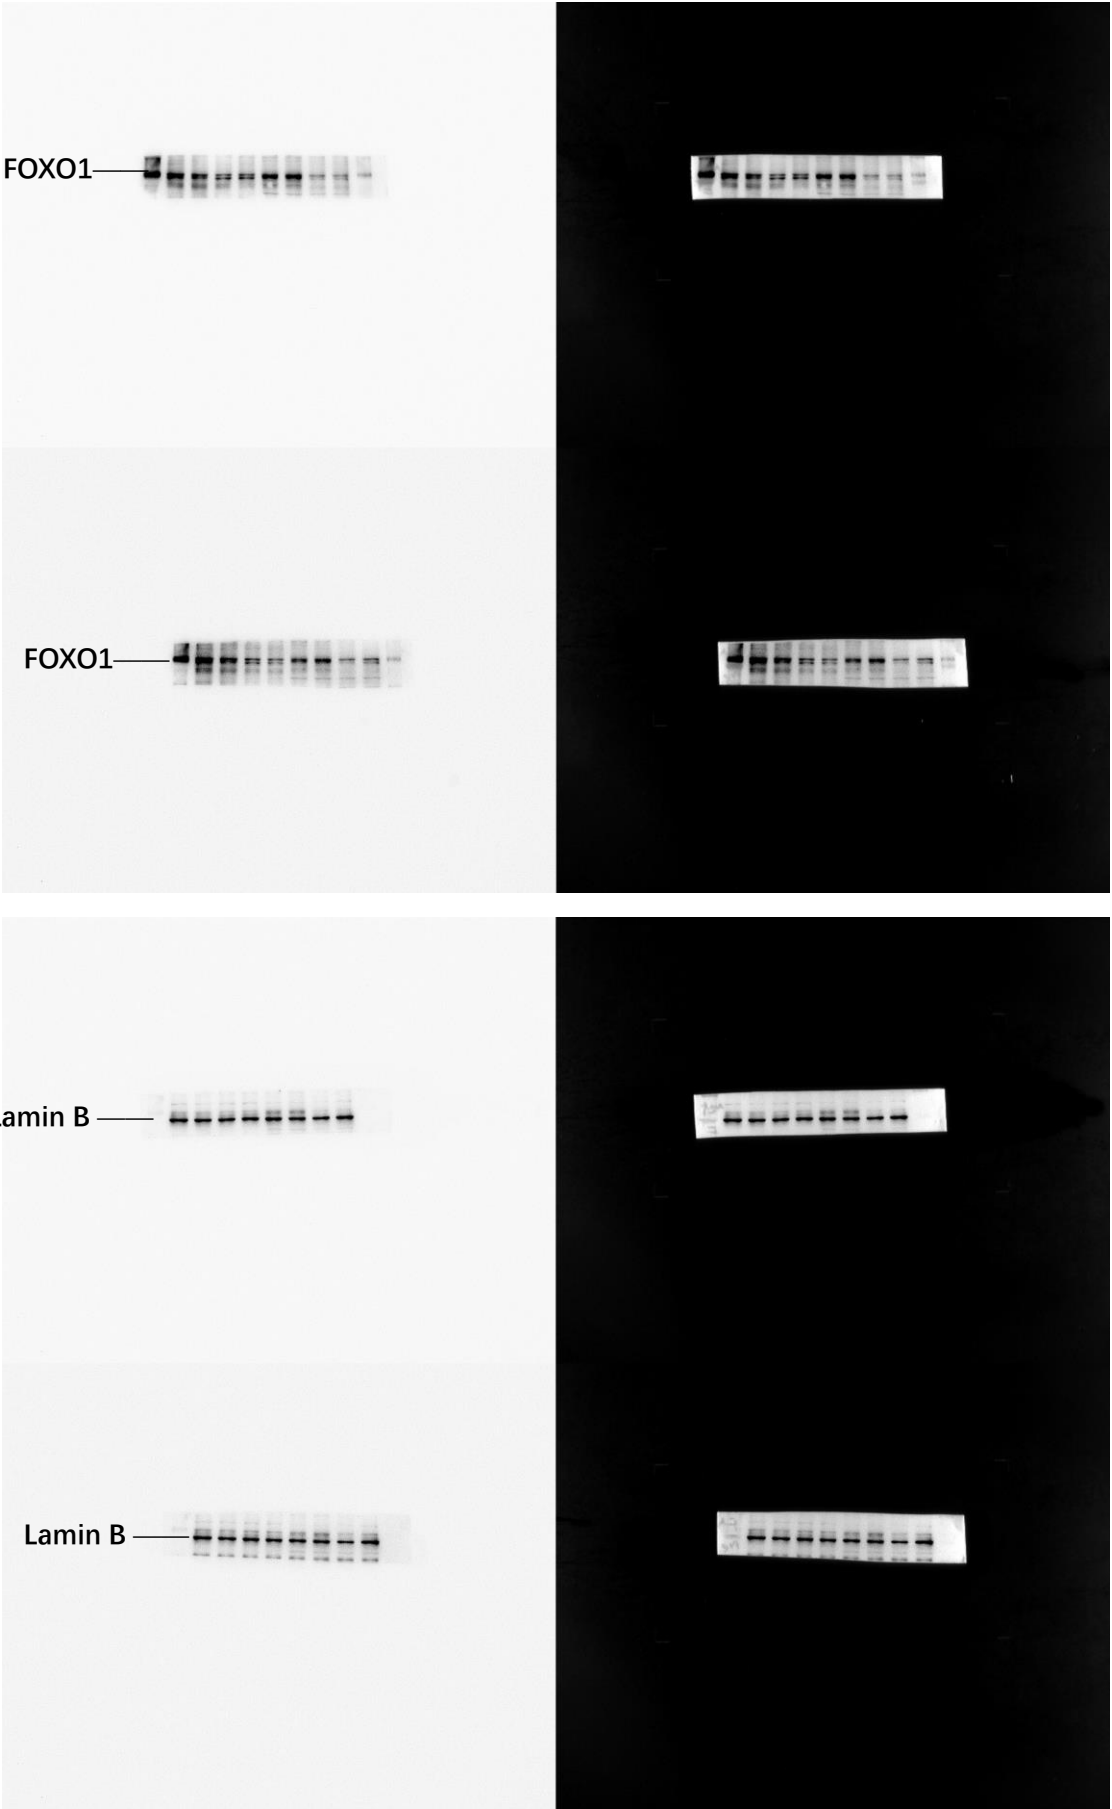

Figure 4G-claudin-5

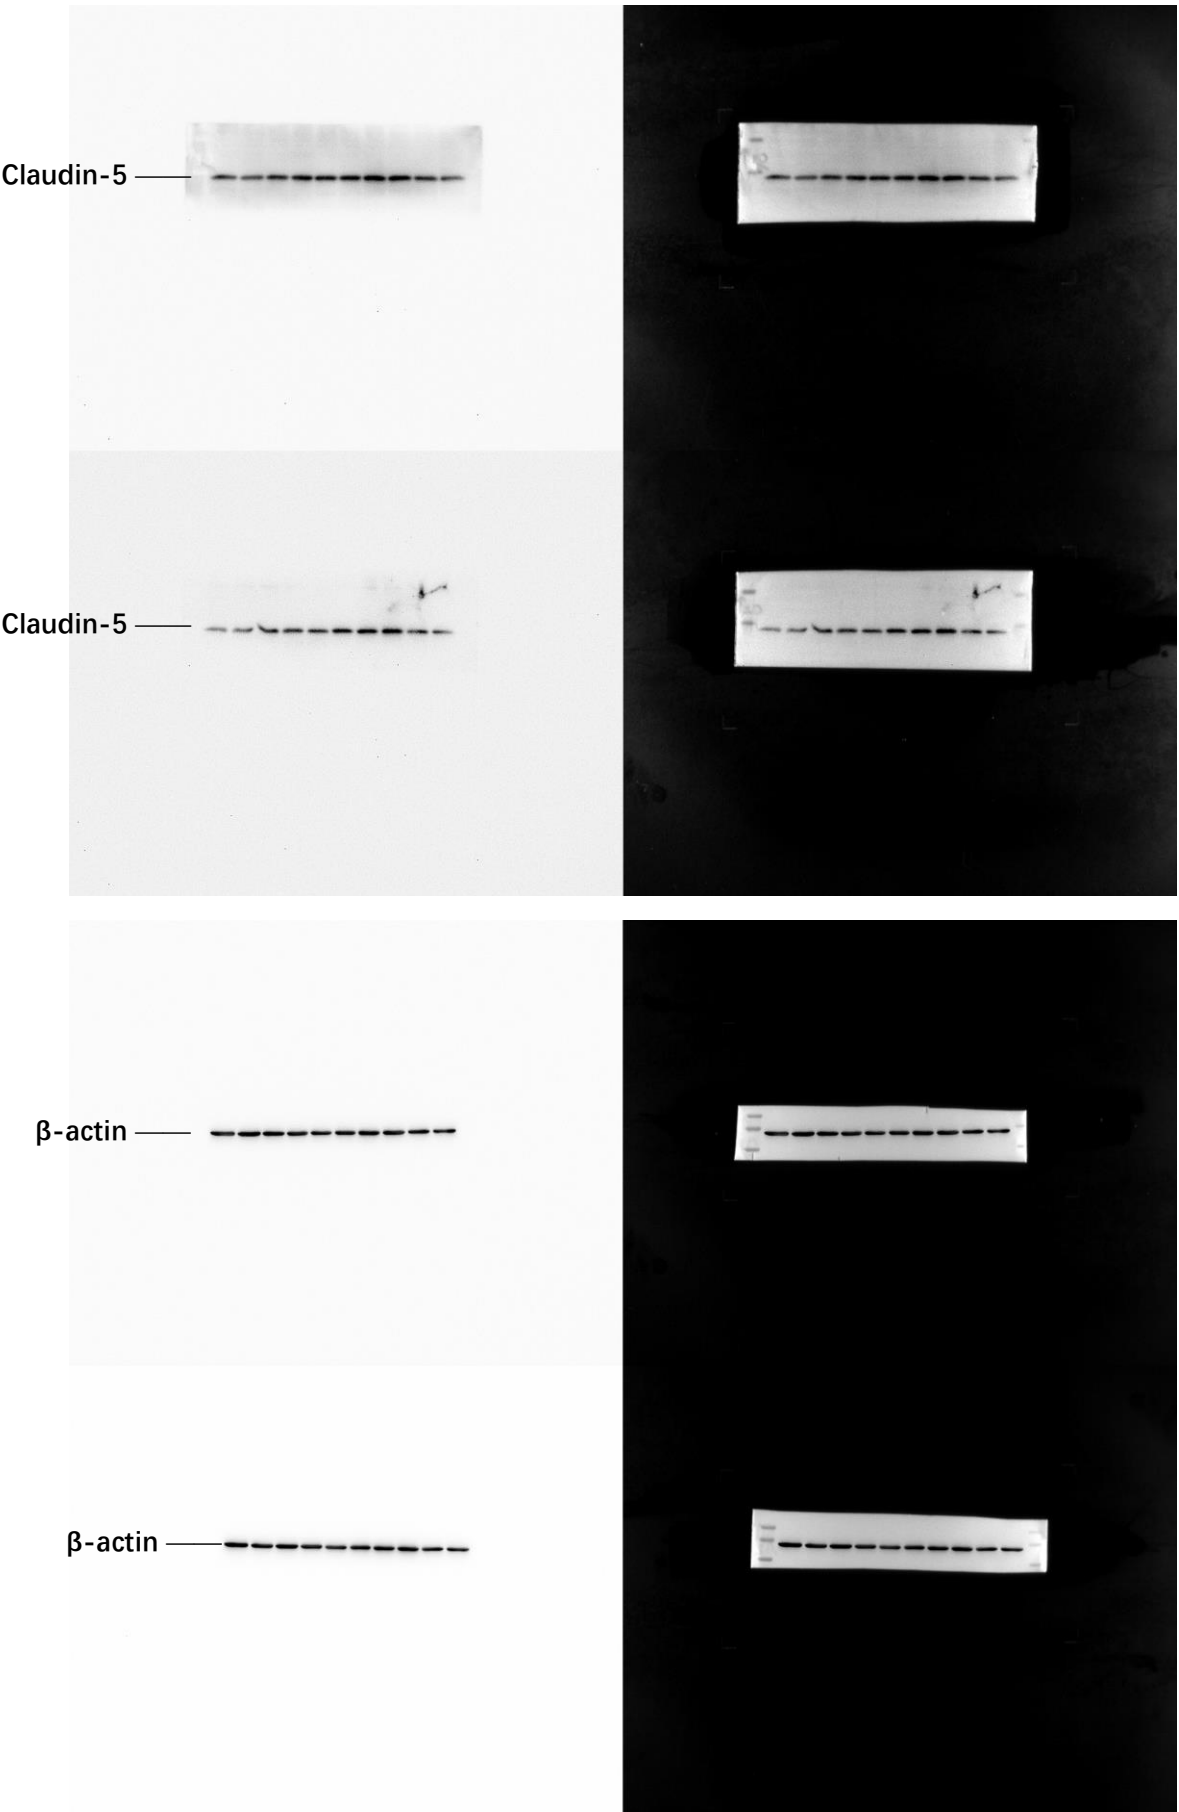

Figure 4G-FOXO1

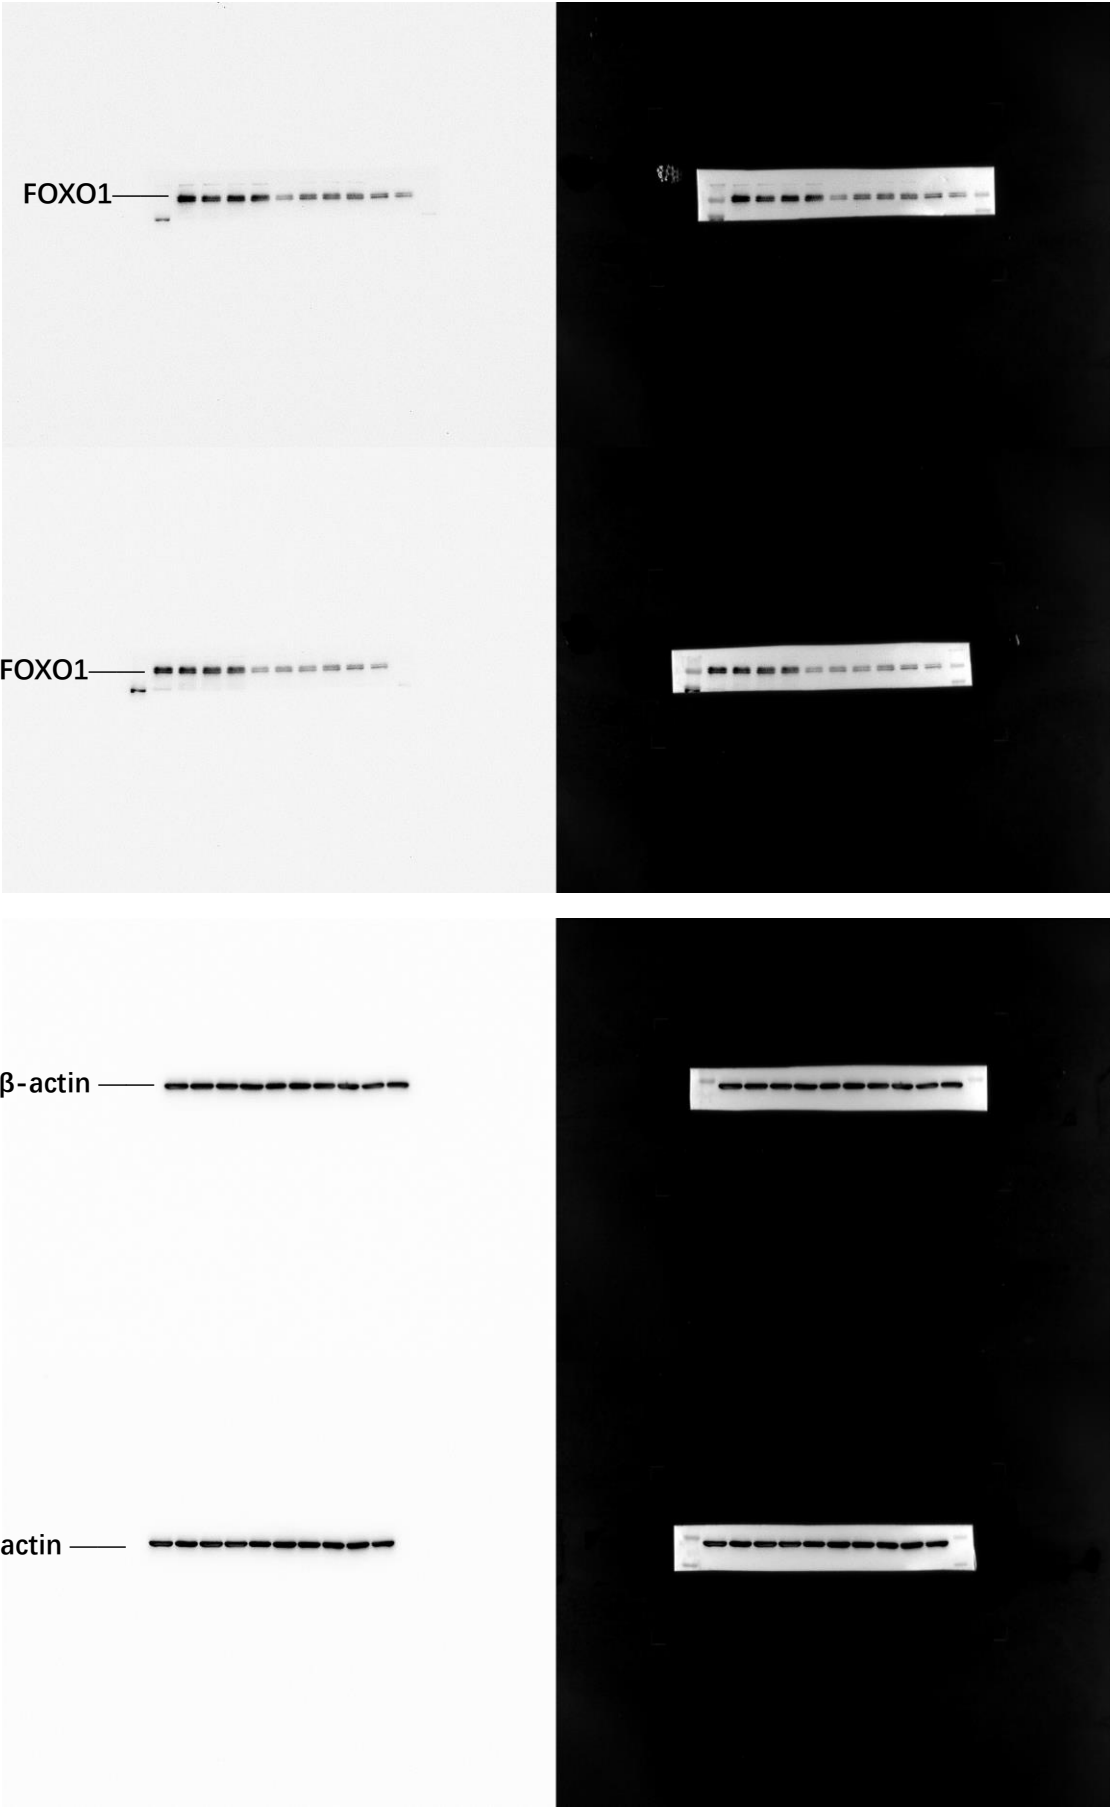

Supplement: fig4-data2 [file elife-96161-fig4-data2-v1.zip]
