# Supplementary material for: Neurons enhance blood–brain barrier function via upregulating claudin-5 and VE-cadherin expression due to glial cell line-derived neurotrophic factor secretion
Source: eLife journal article supplement (doi:10.7554/elife.96161), 2024-05-29

Figure 1K-Claudin-5

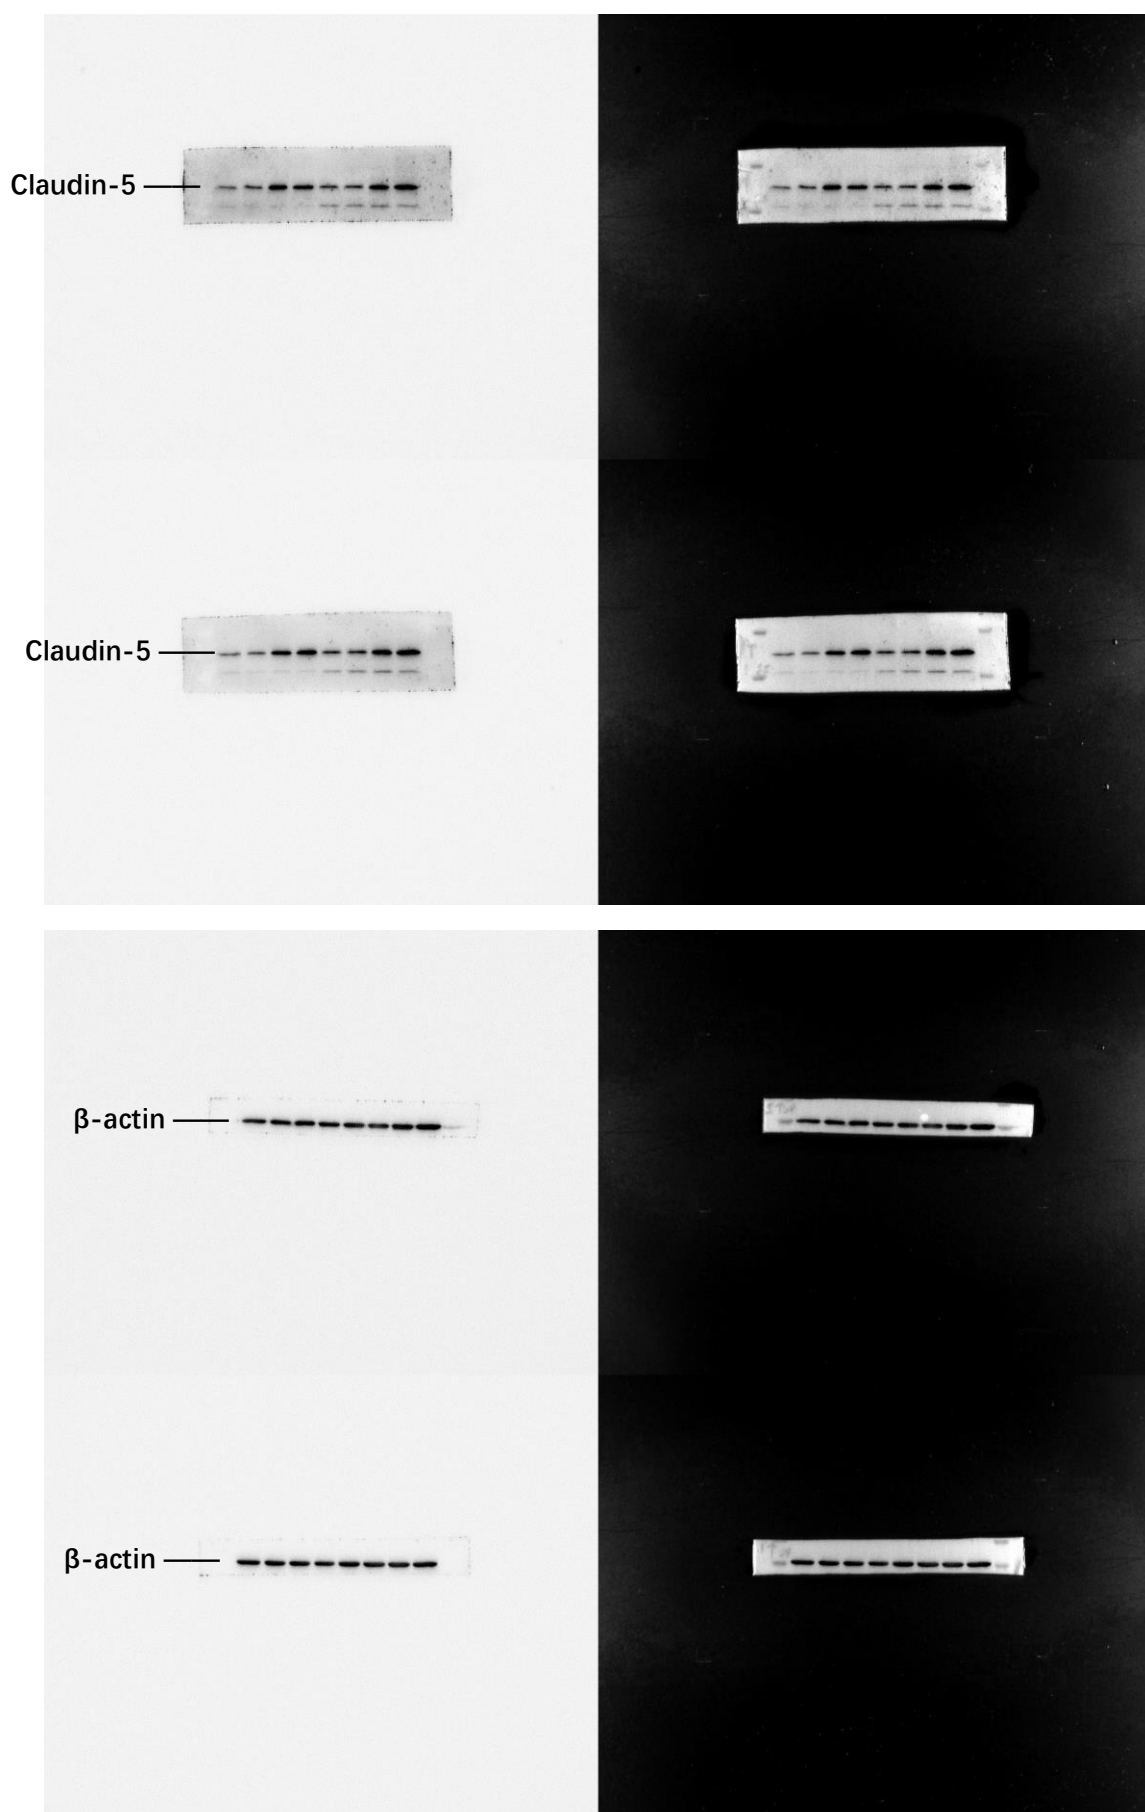

Figure 1K-ZO-1

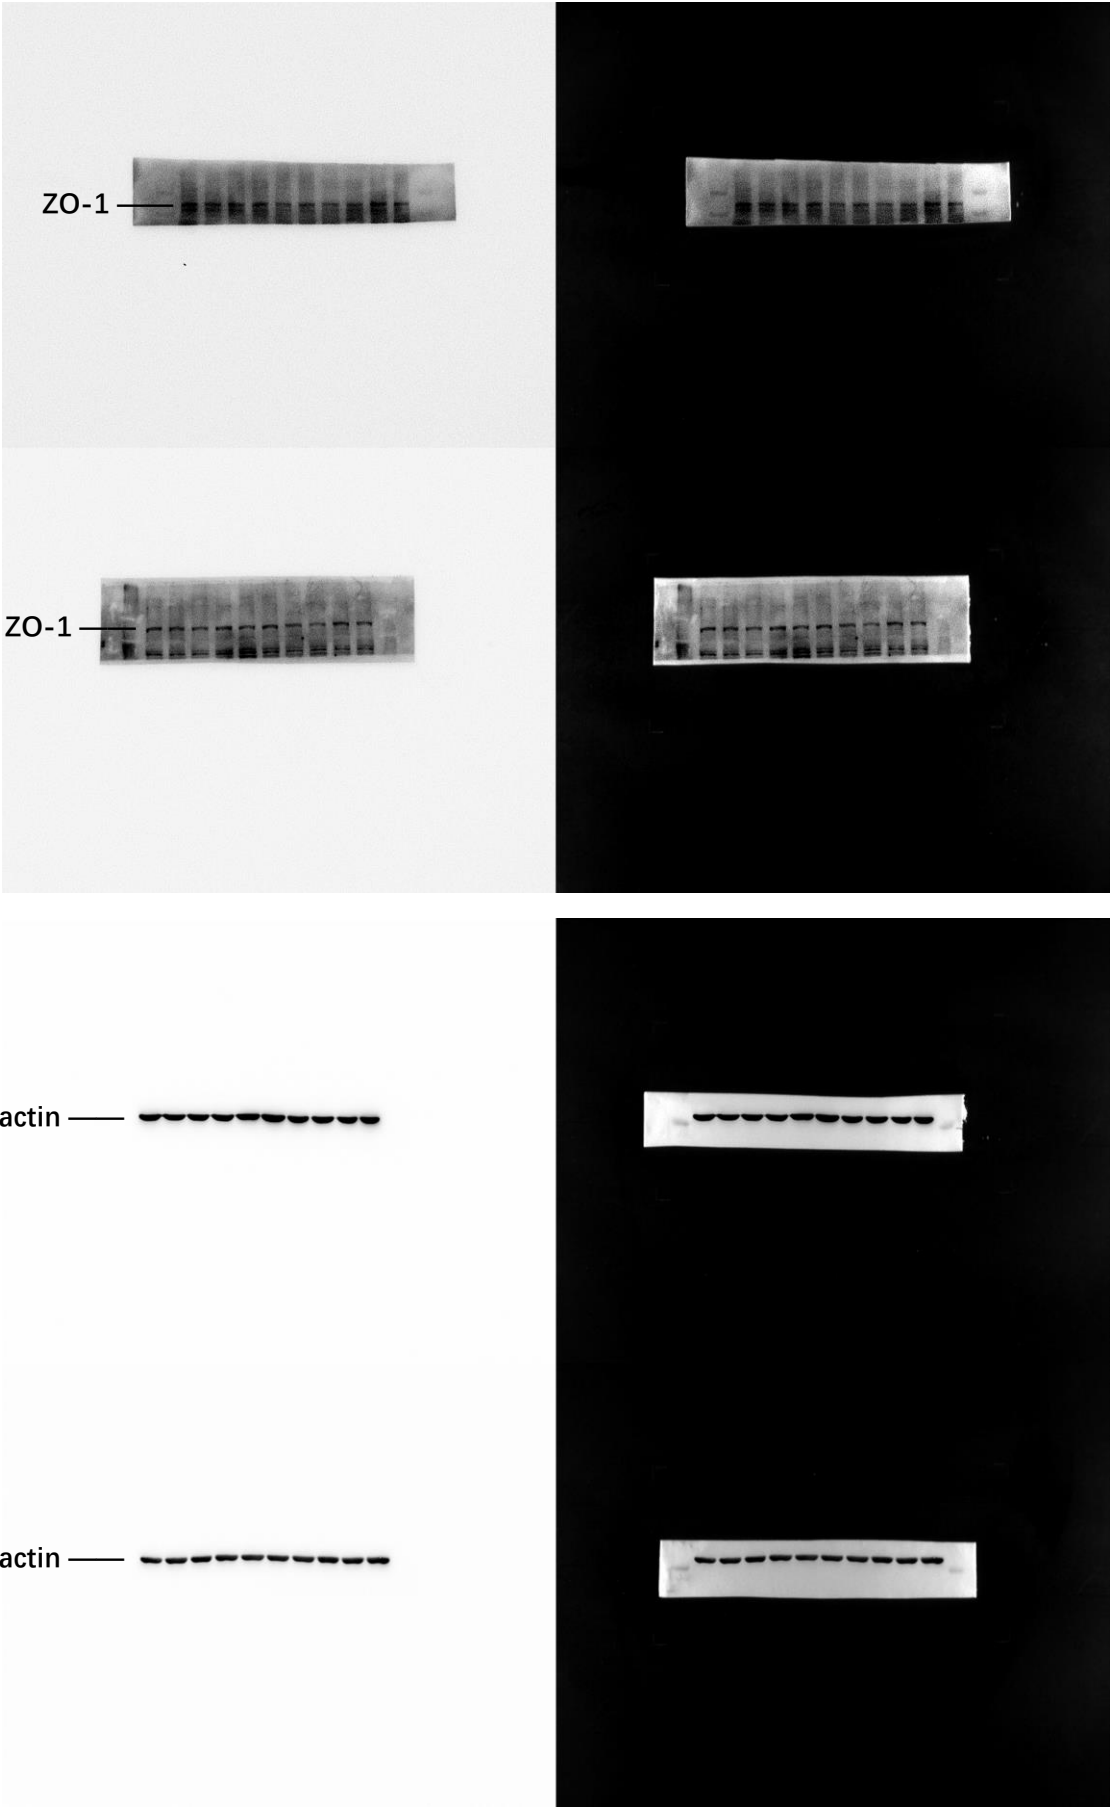

Figure 1K-Occludin

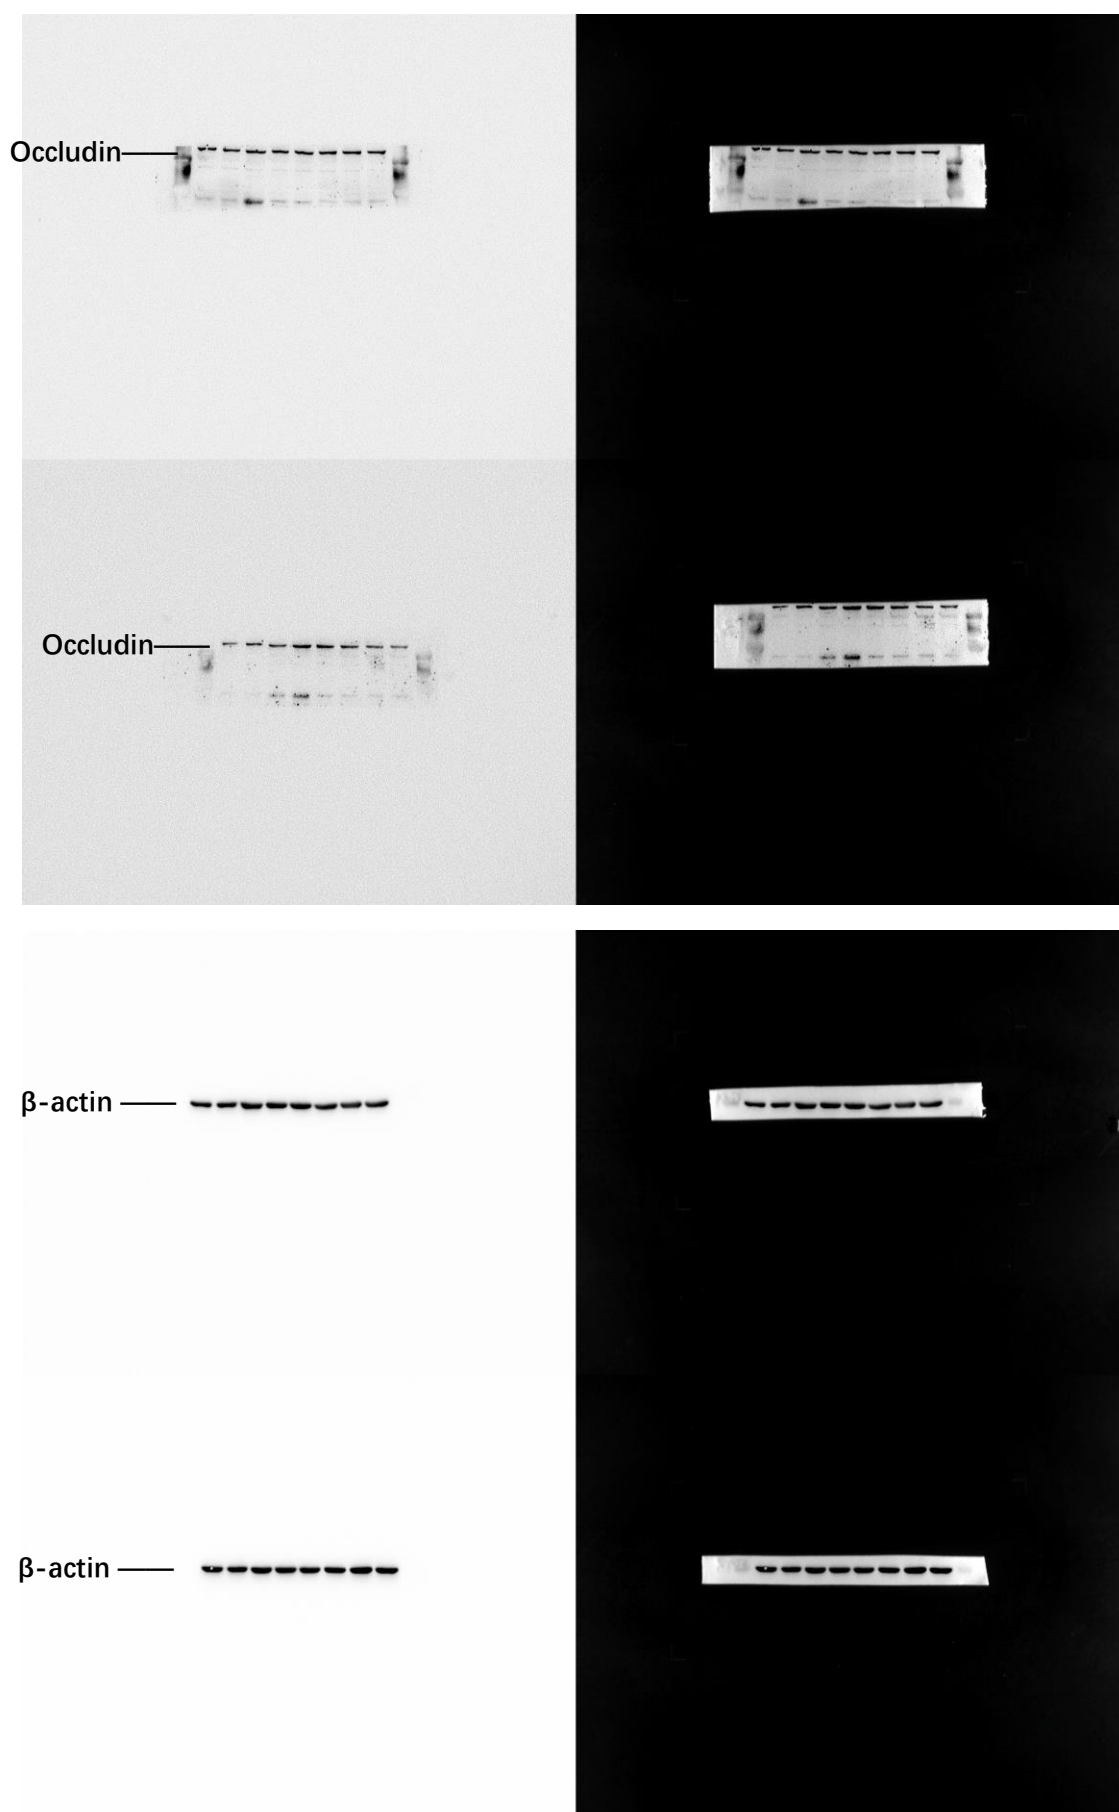

Figure 1M -VE-Cadherin

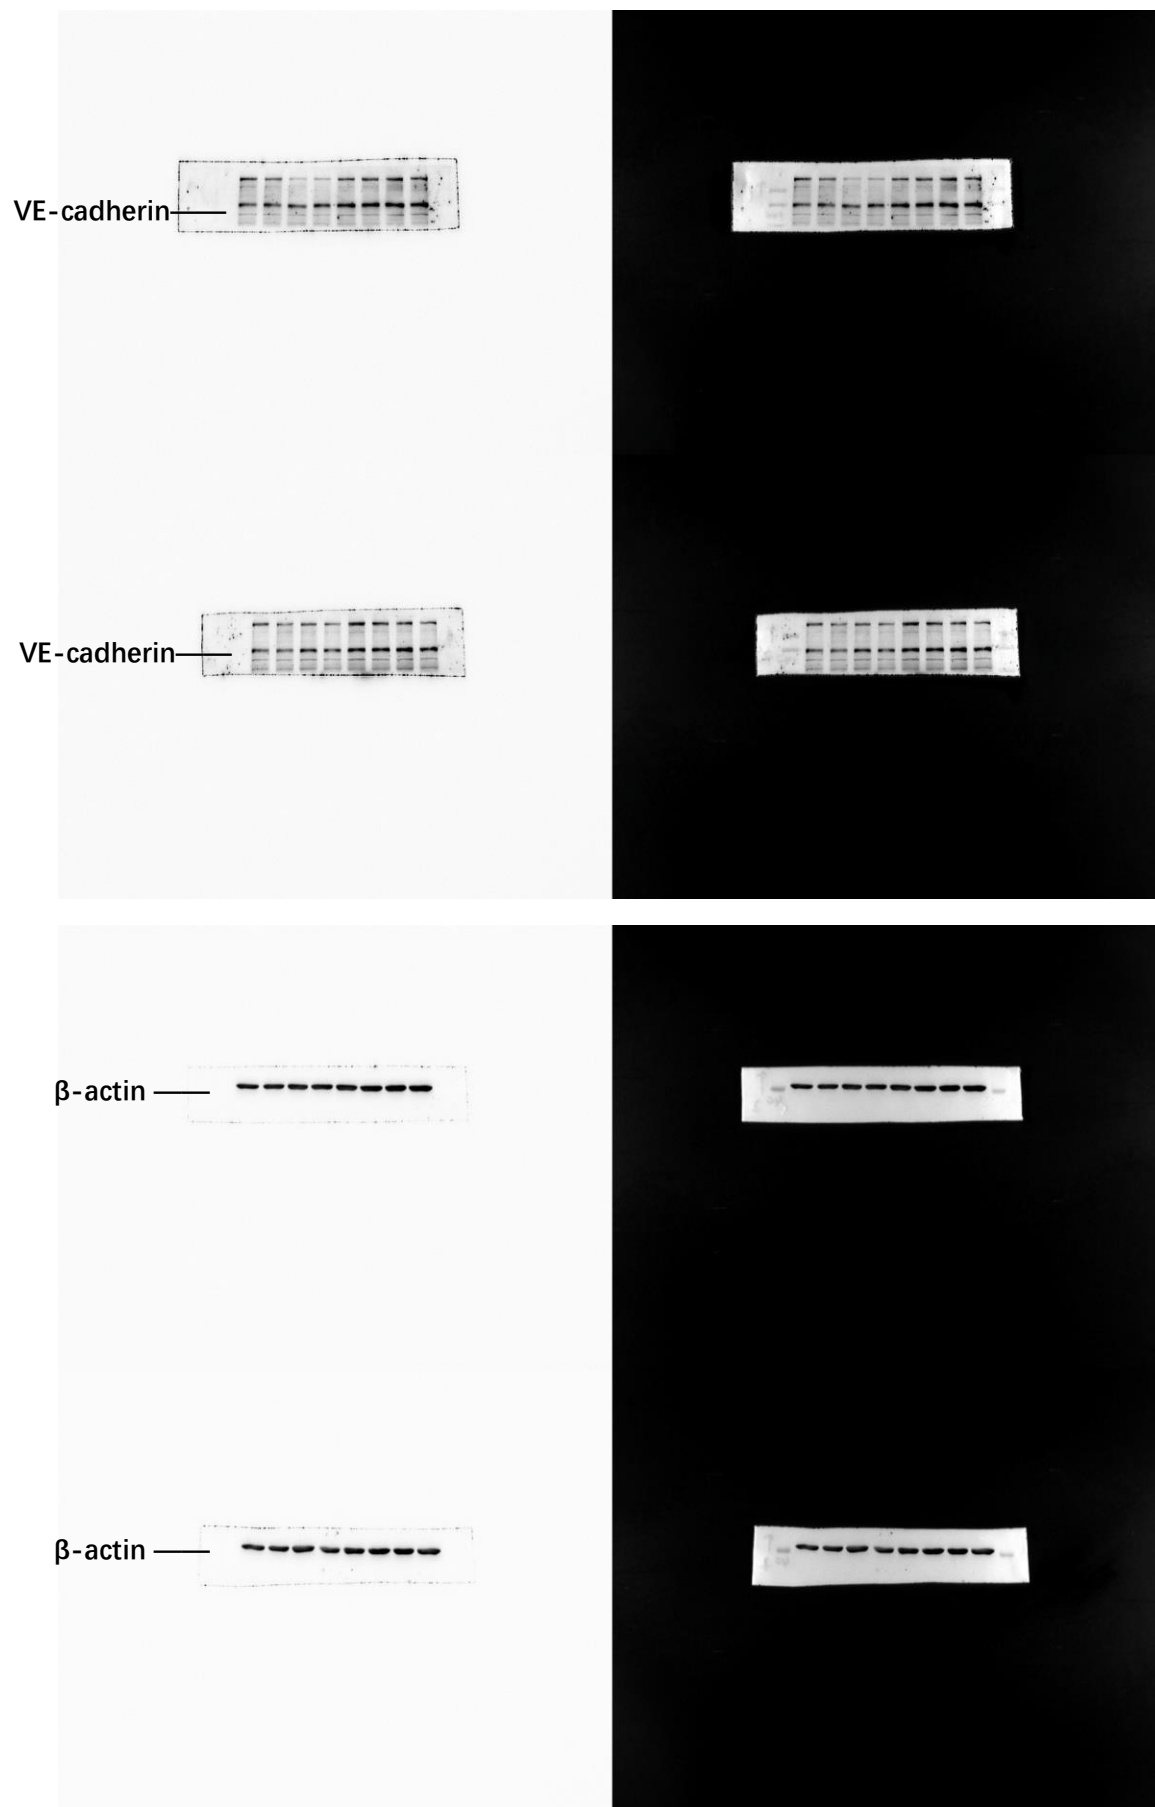

Figure 1M-β-catenin

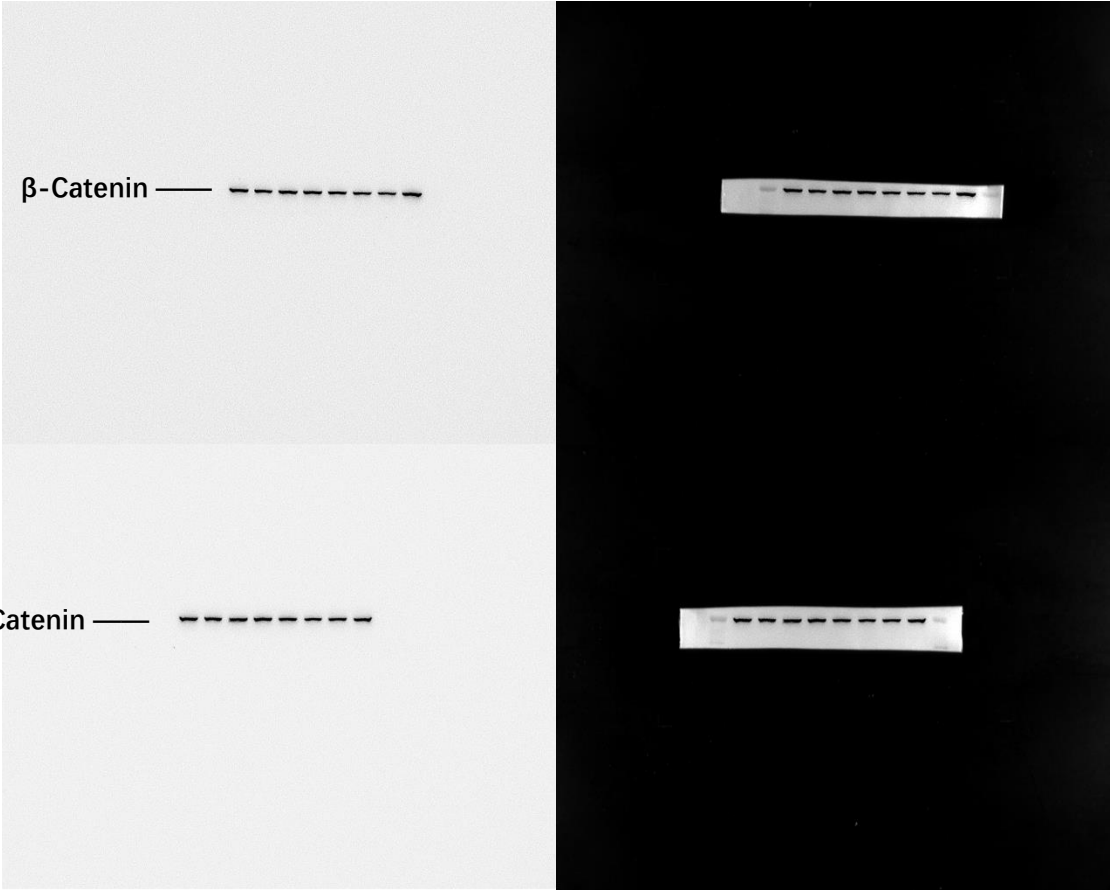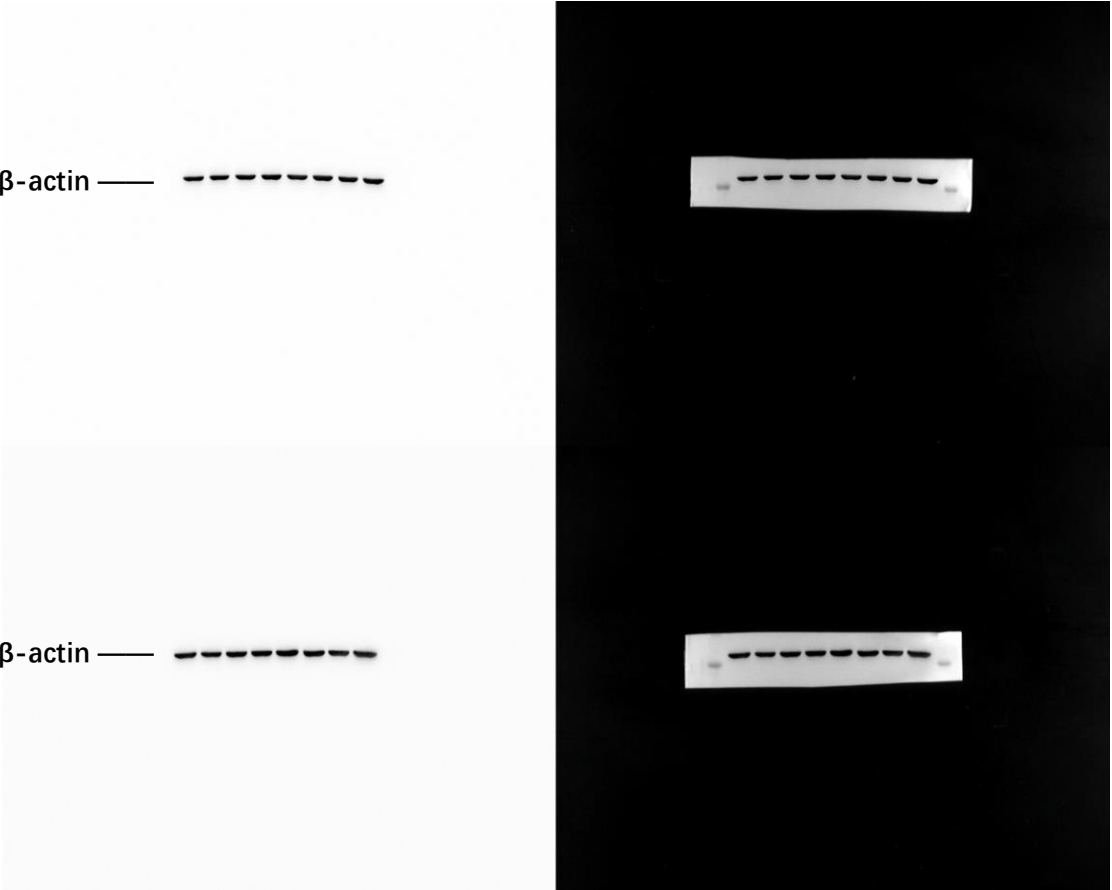

Figure 1M-BCRP

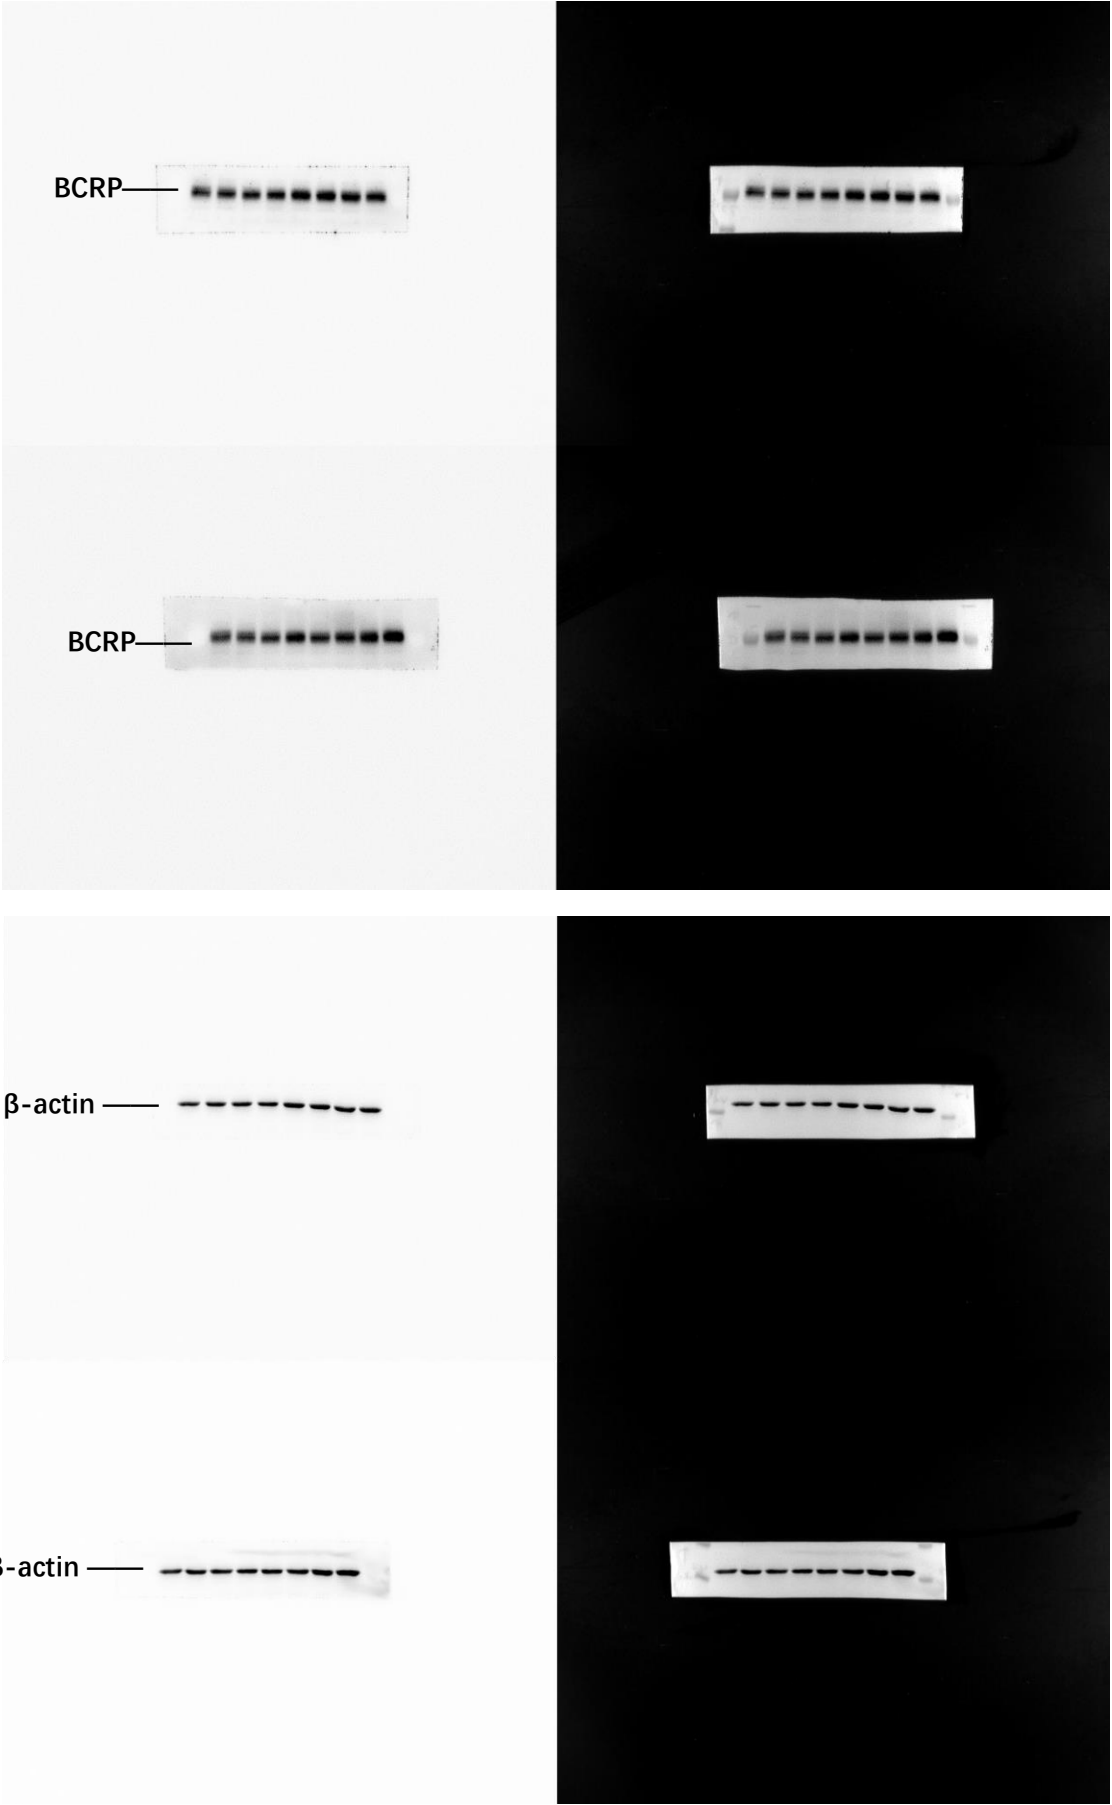

Supplement: fig1-data2 [file elife-96161-fig1-data2-v1.zip]
