# Supplementary material for: Neurons enhance blood–brain barrier function via upregulating claudin-5 and VE-cadherin expression due to glial cell line-derived neurotrophic factor secretion
Source: eLife journal article supplement (doi:10.7554/elife.96161), 2024-05-29

Figure 5A-ETS1

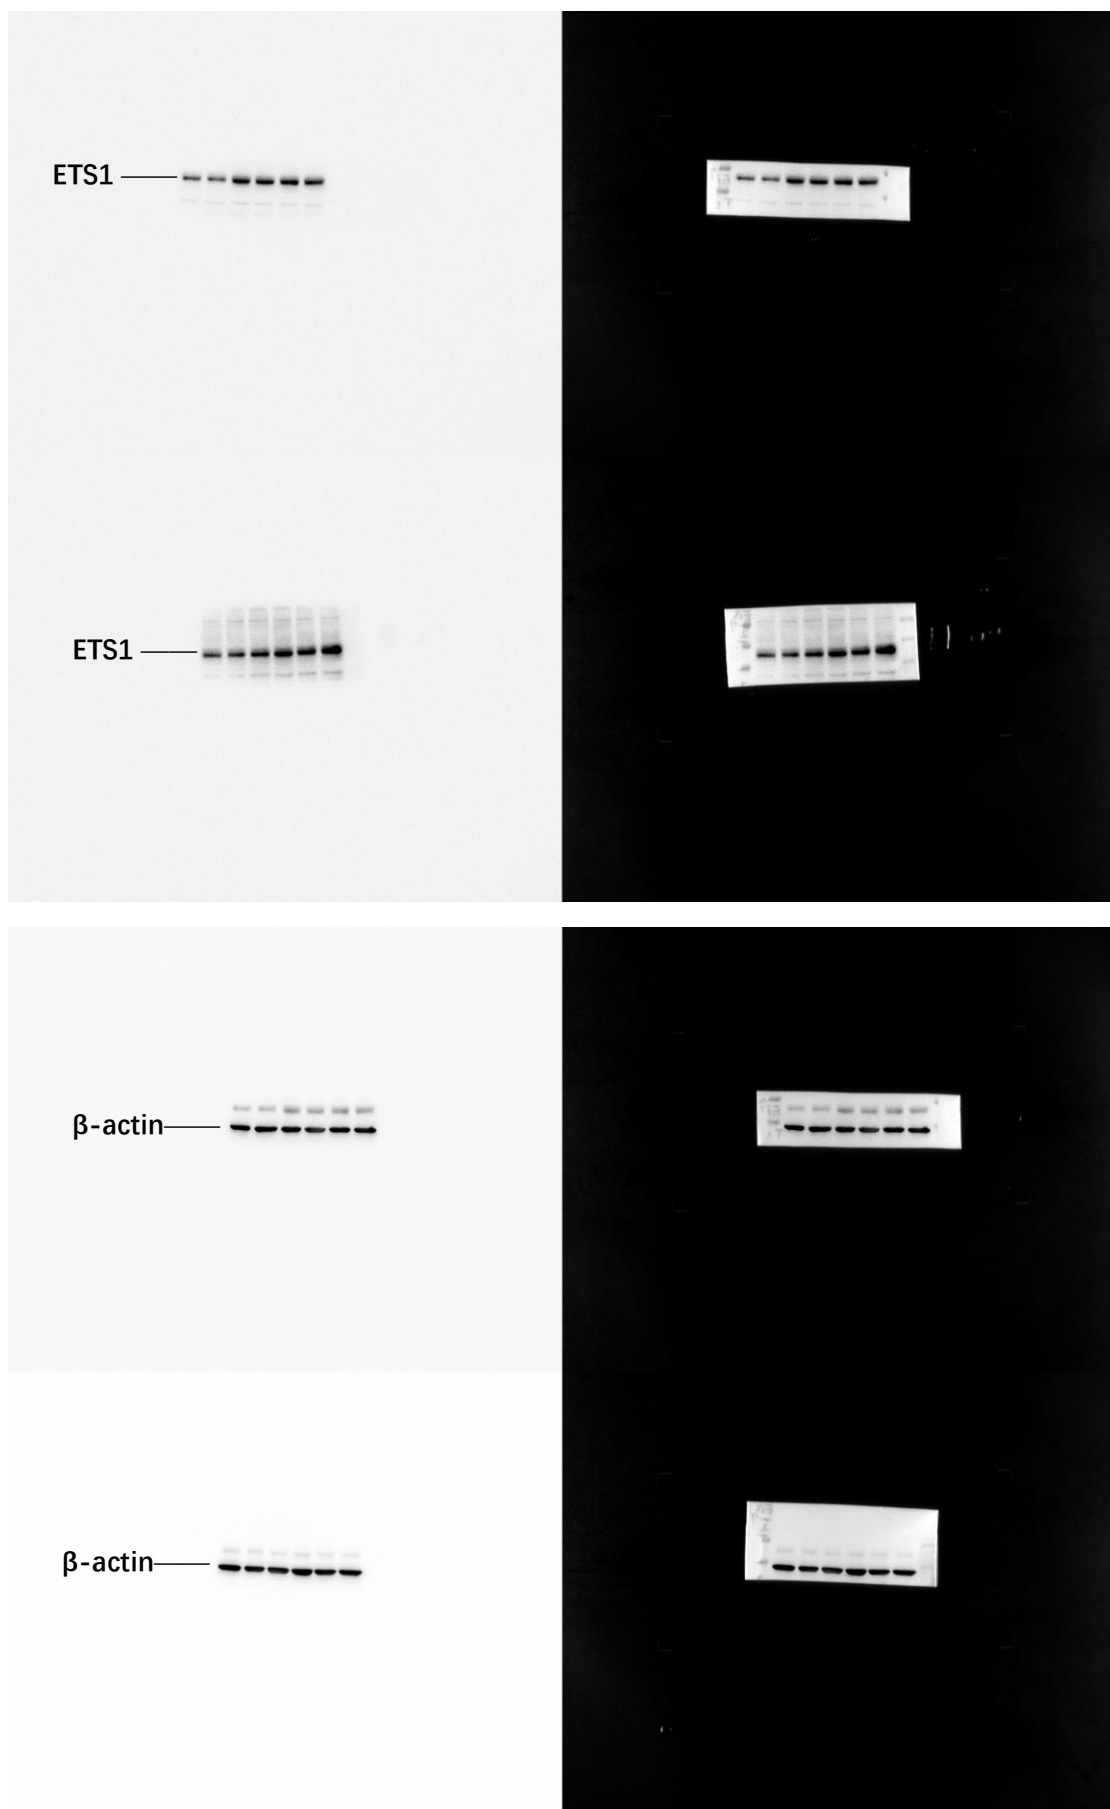

Figure 5B-ETS1

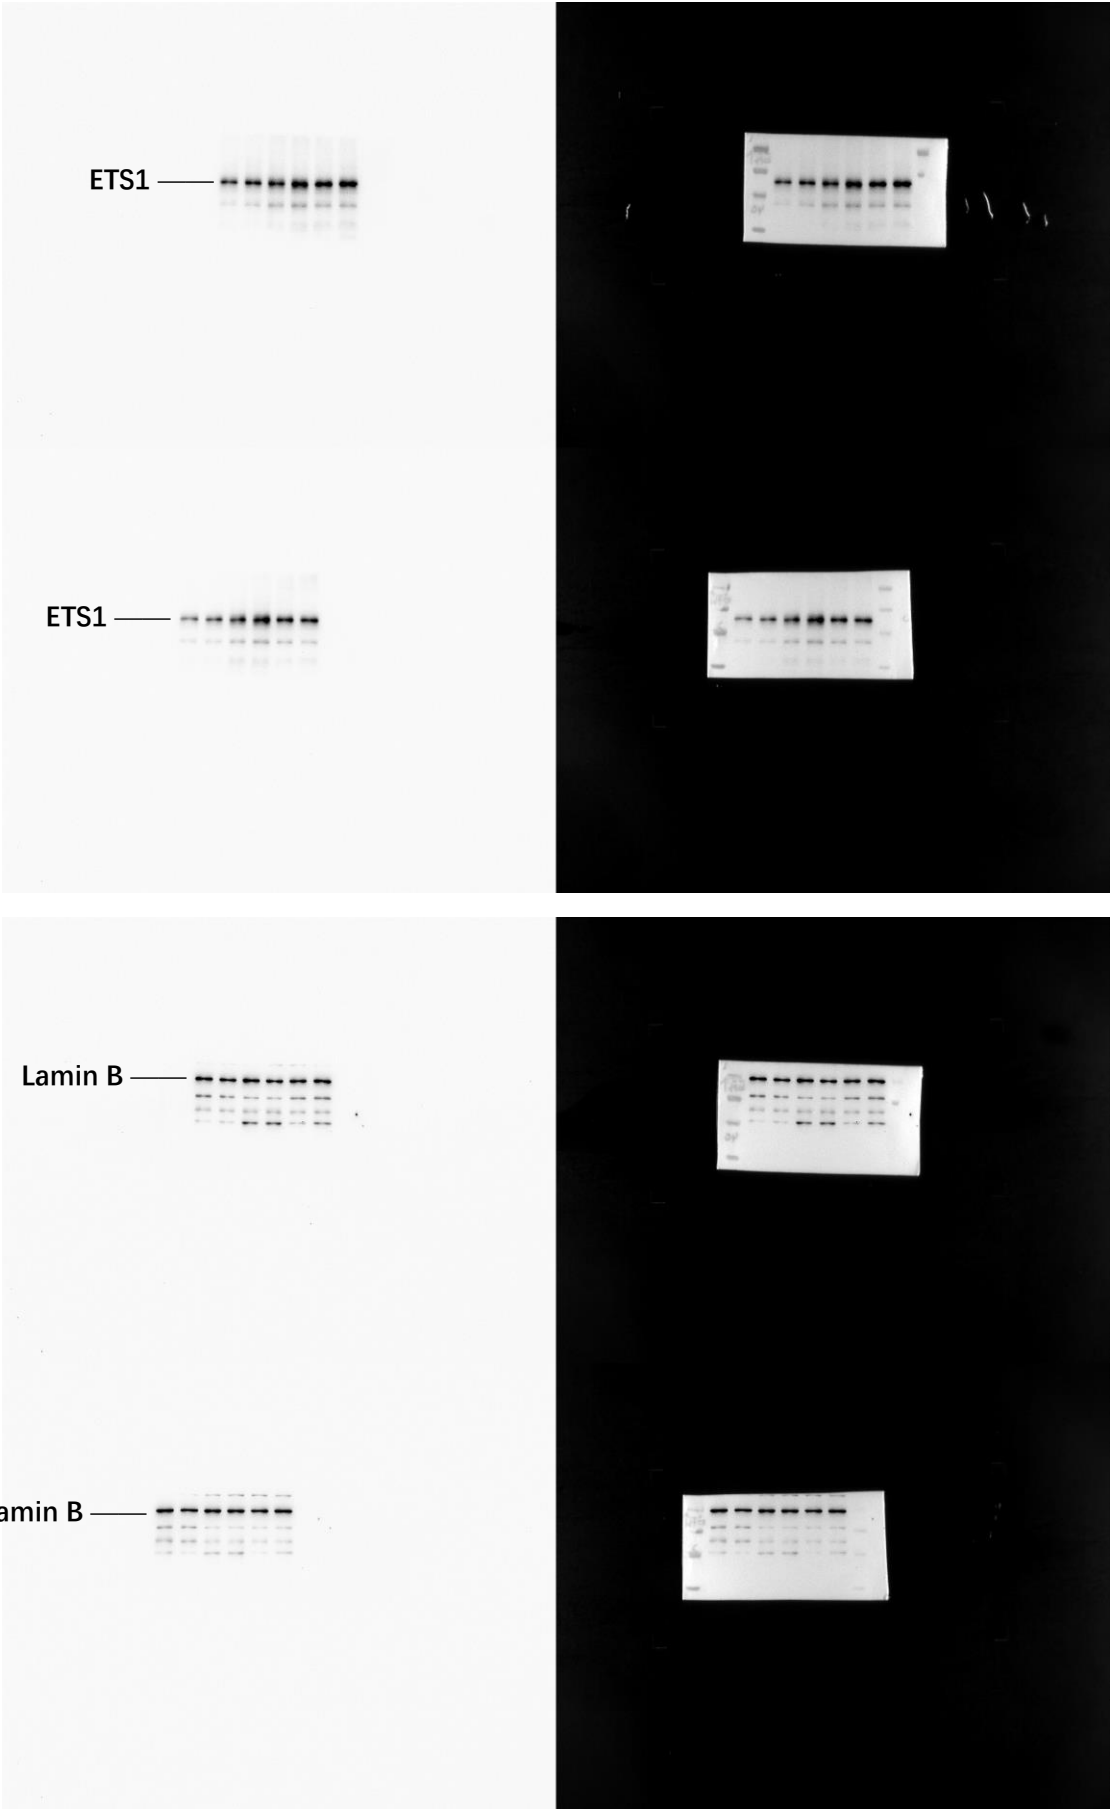

Figure 5C-ETS1

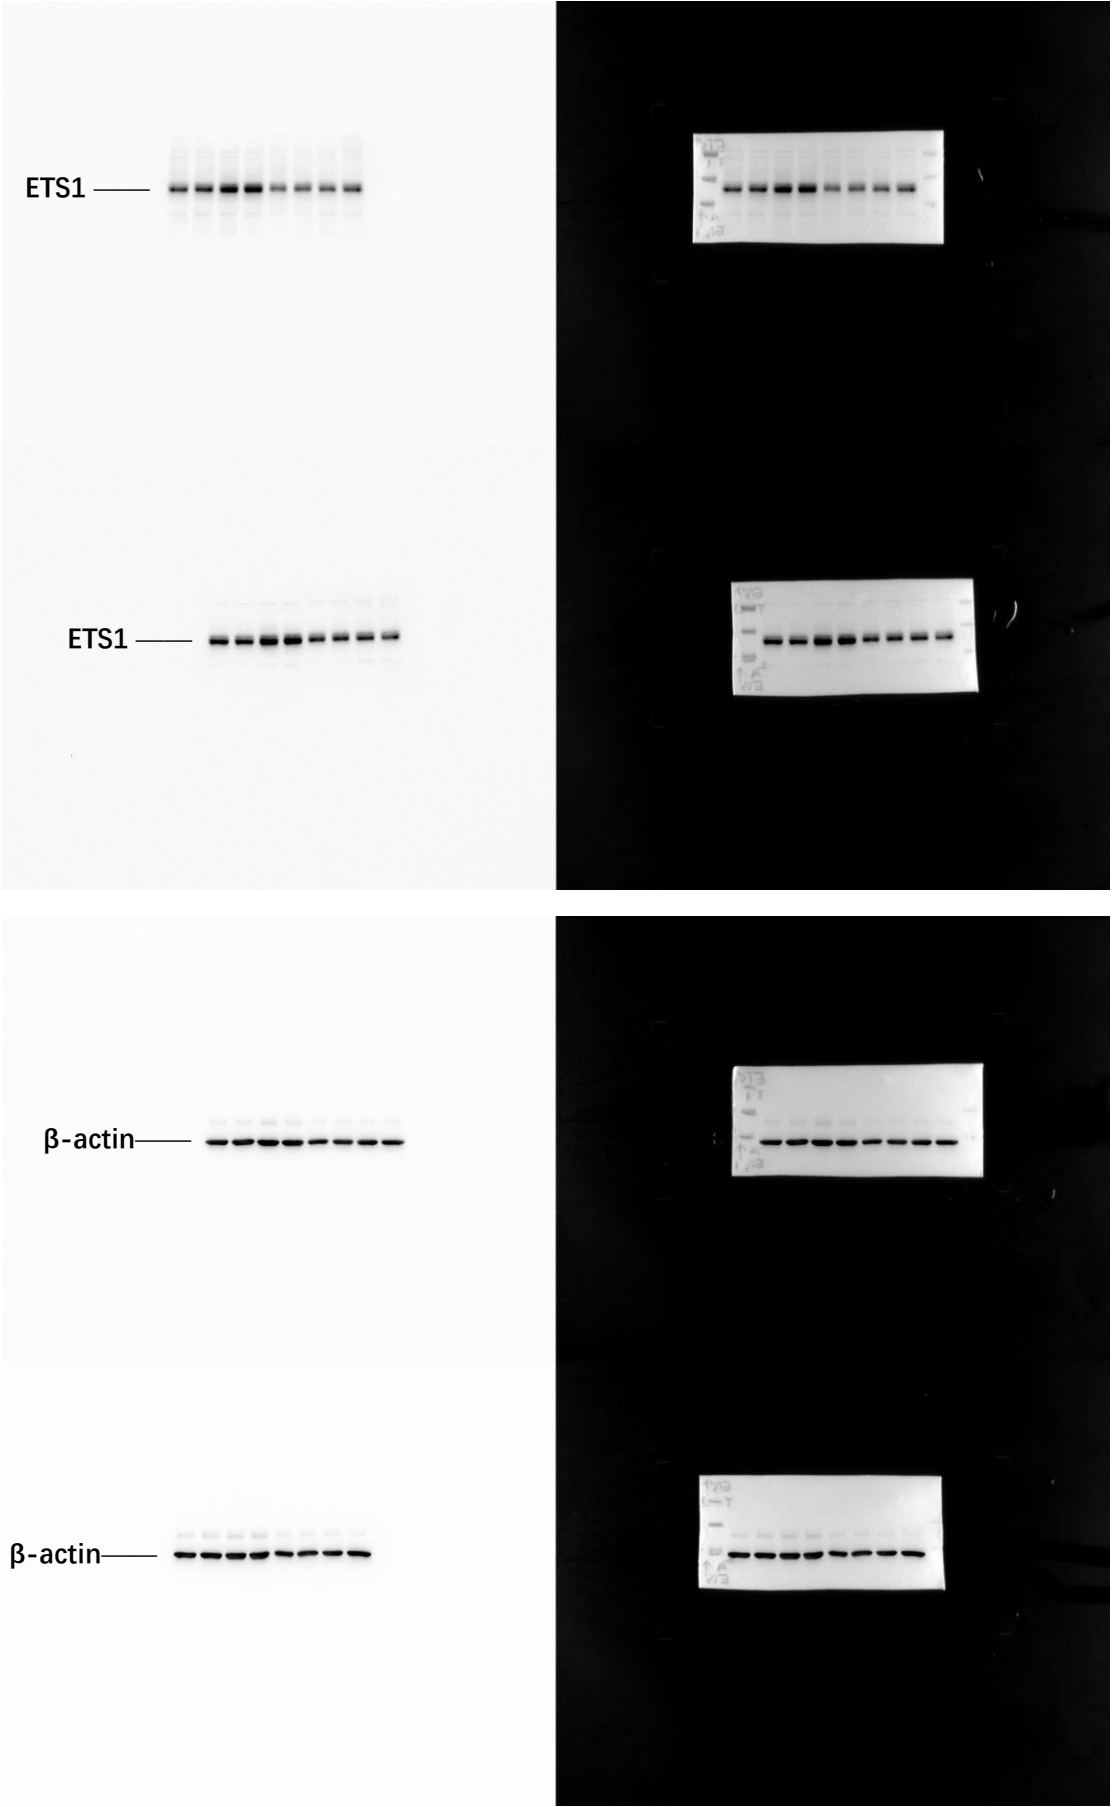

Figure 5D-ETS1

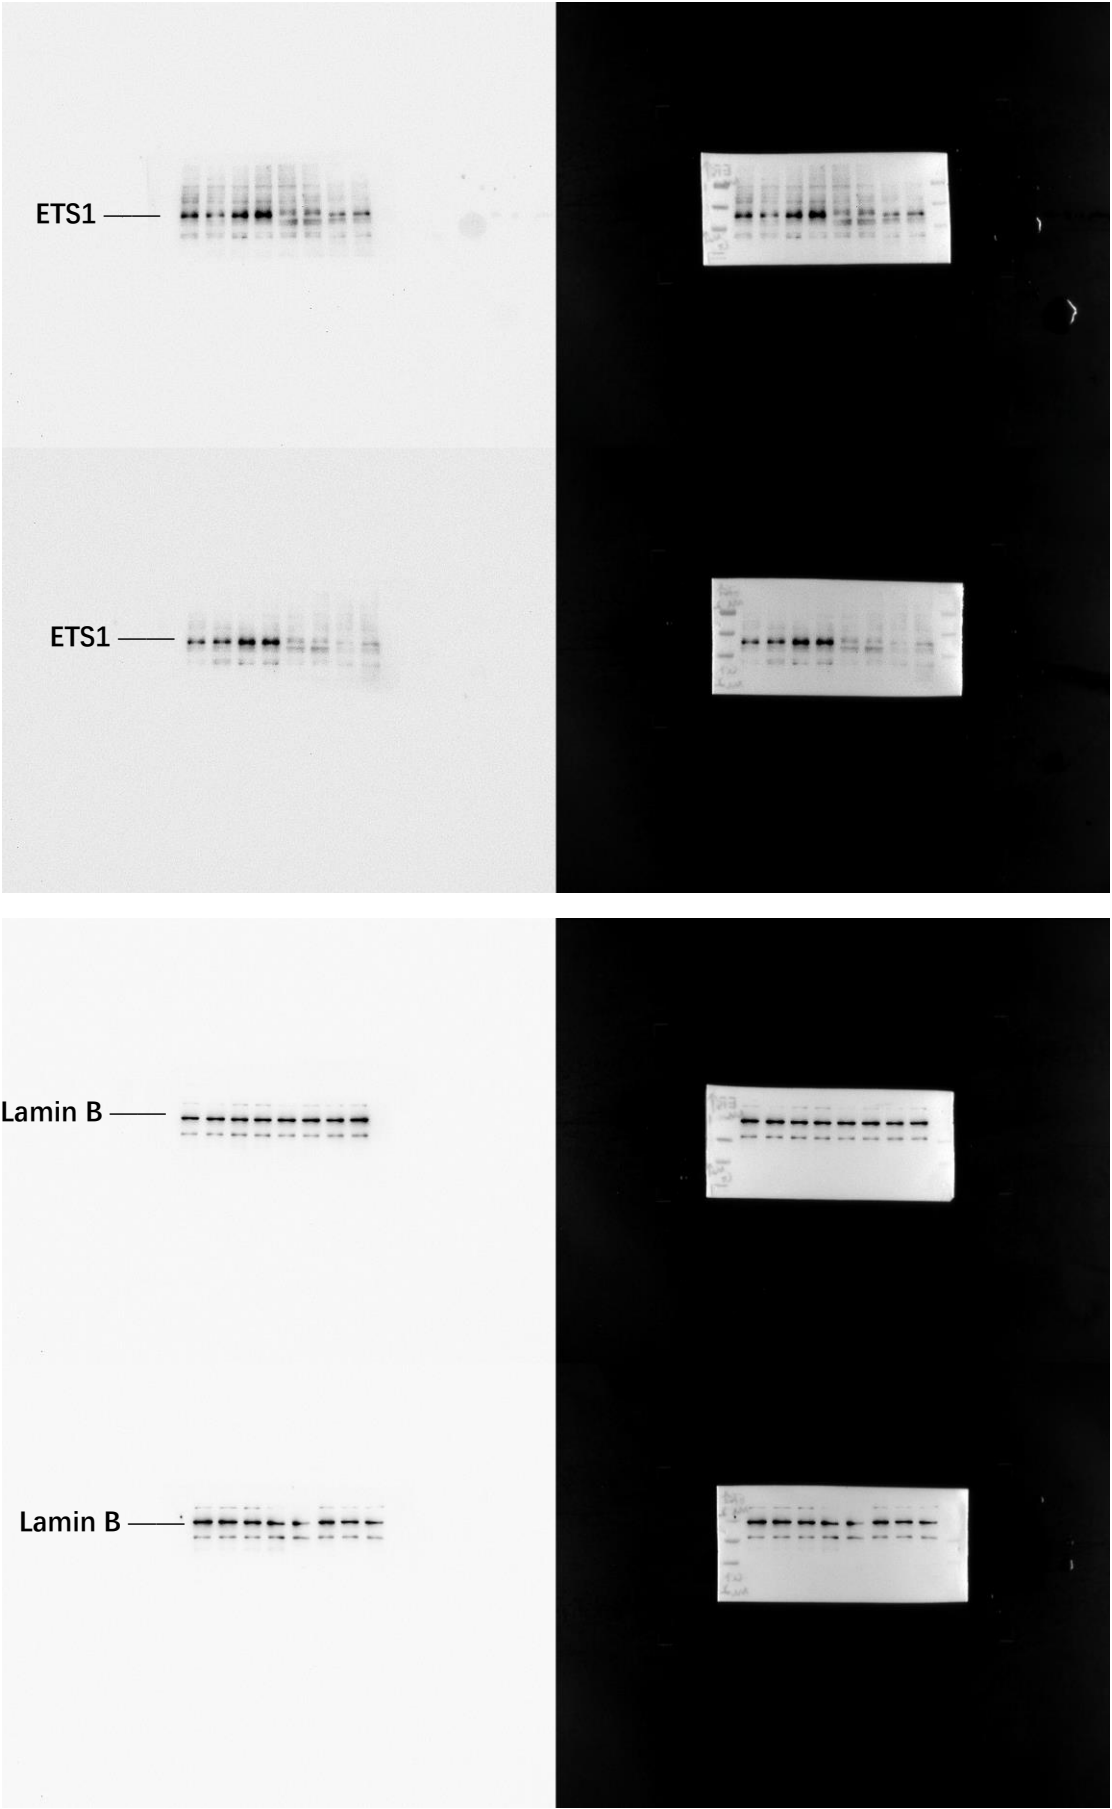

Figure 5E-ETS1

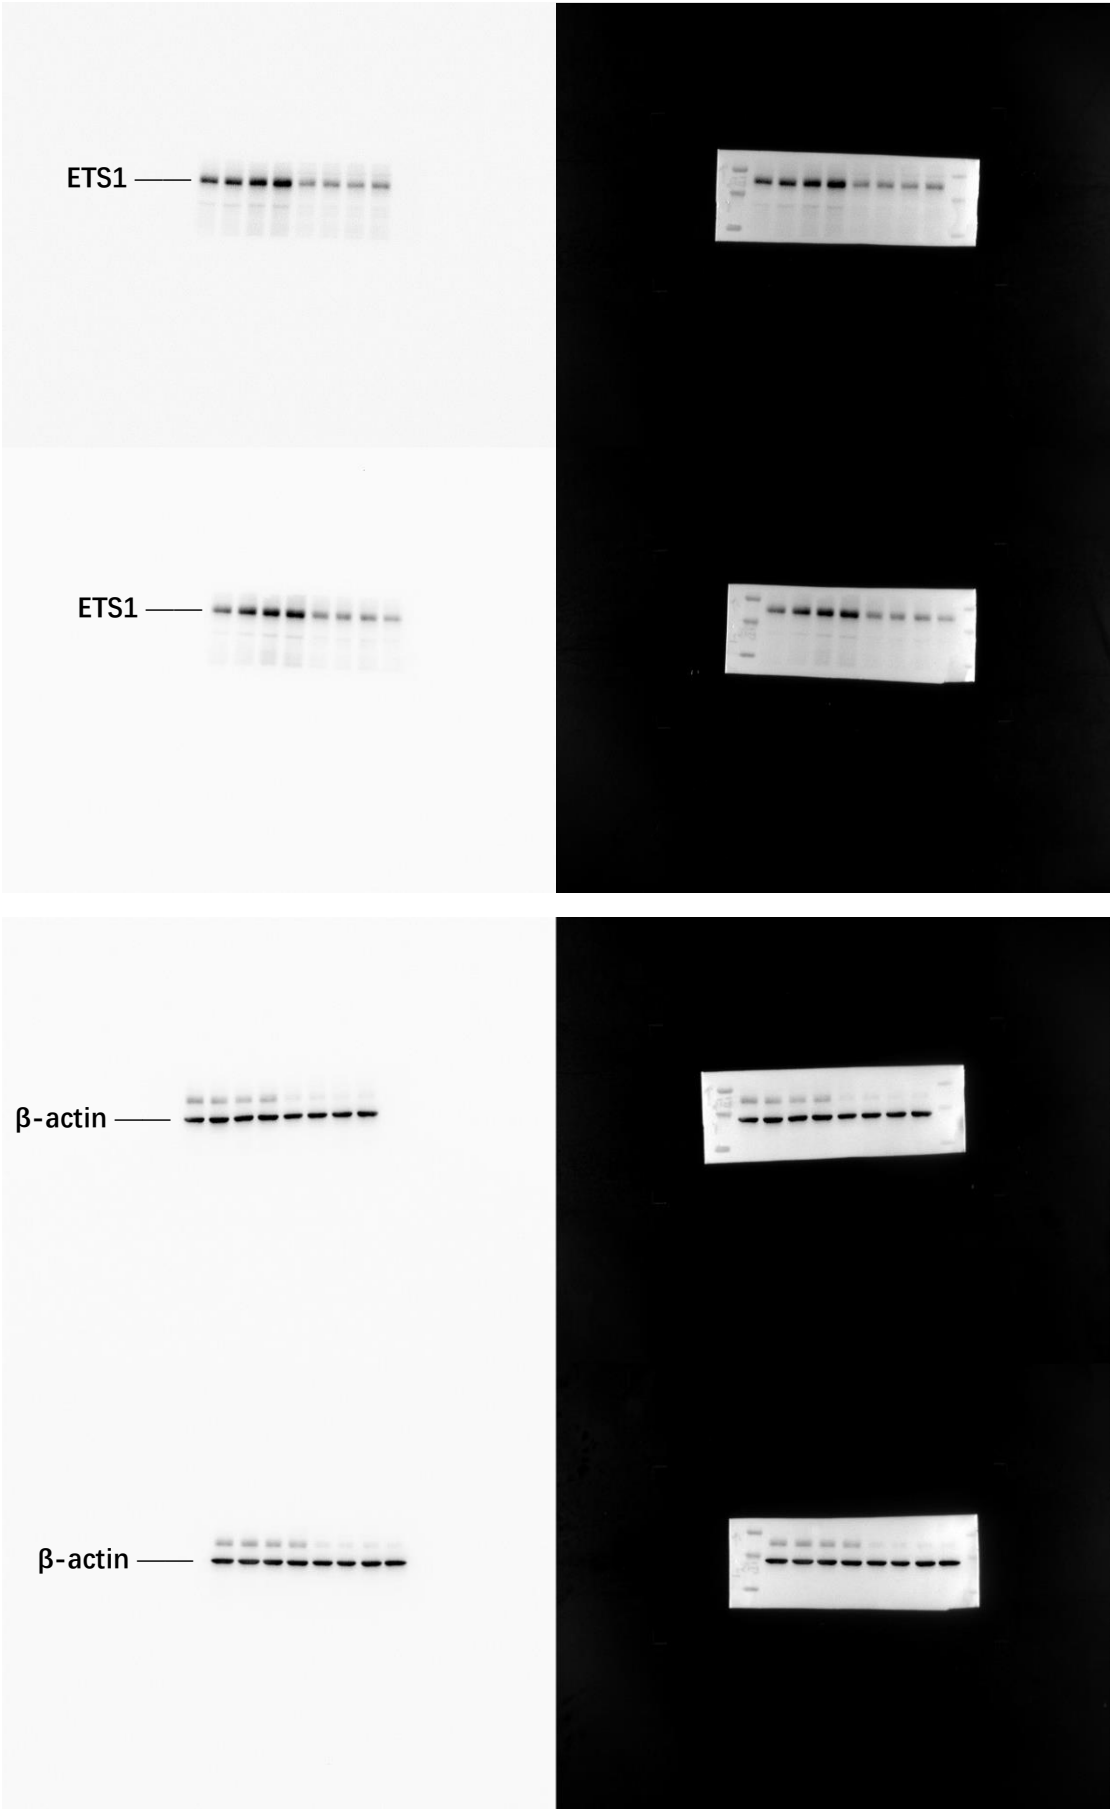

Figure 5F-ETS1

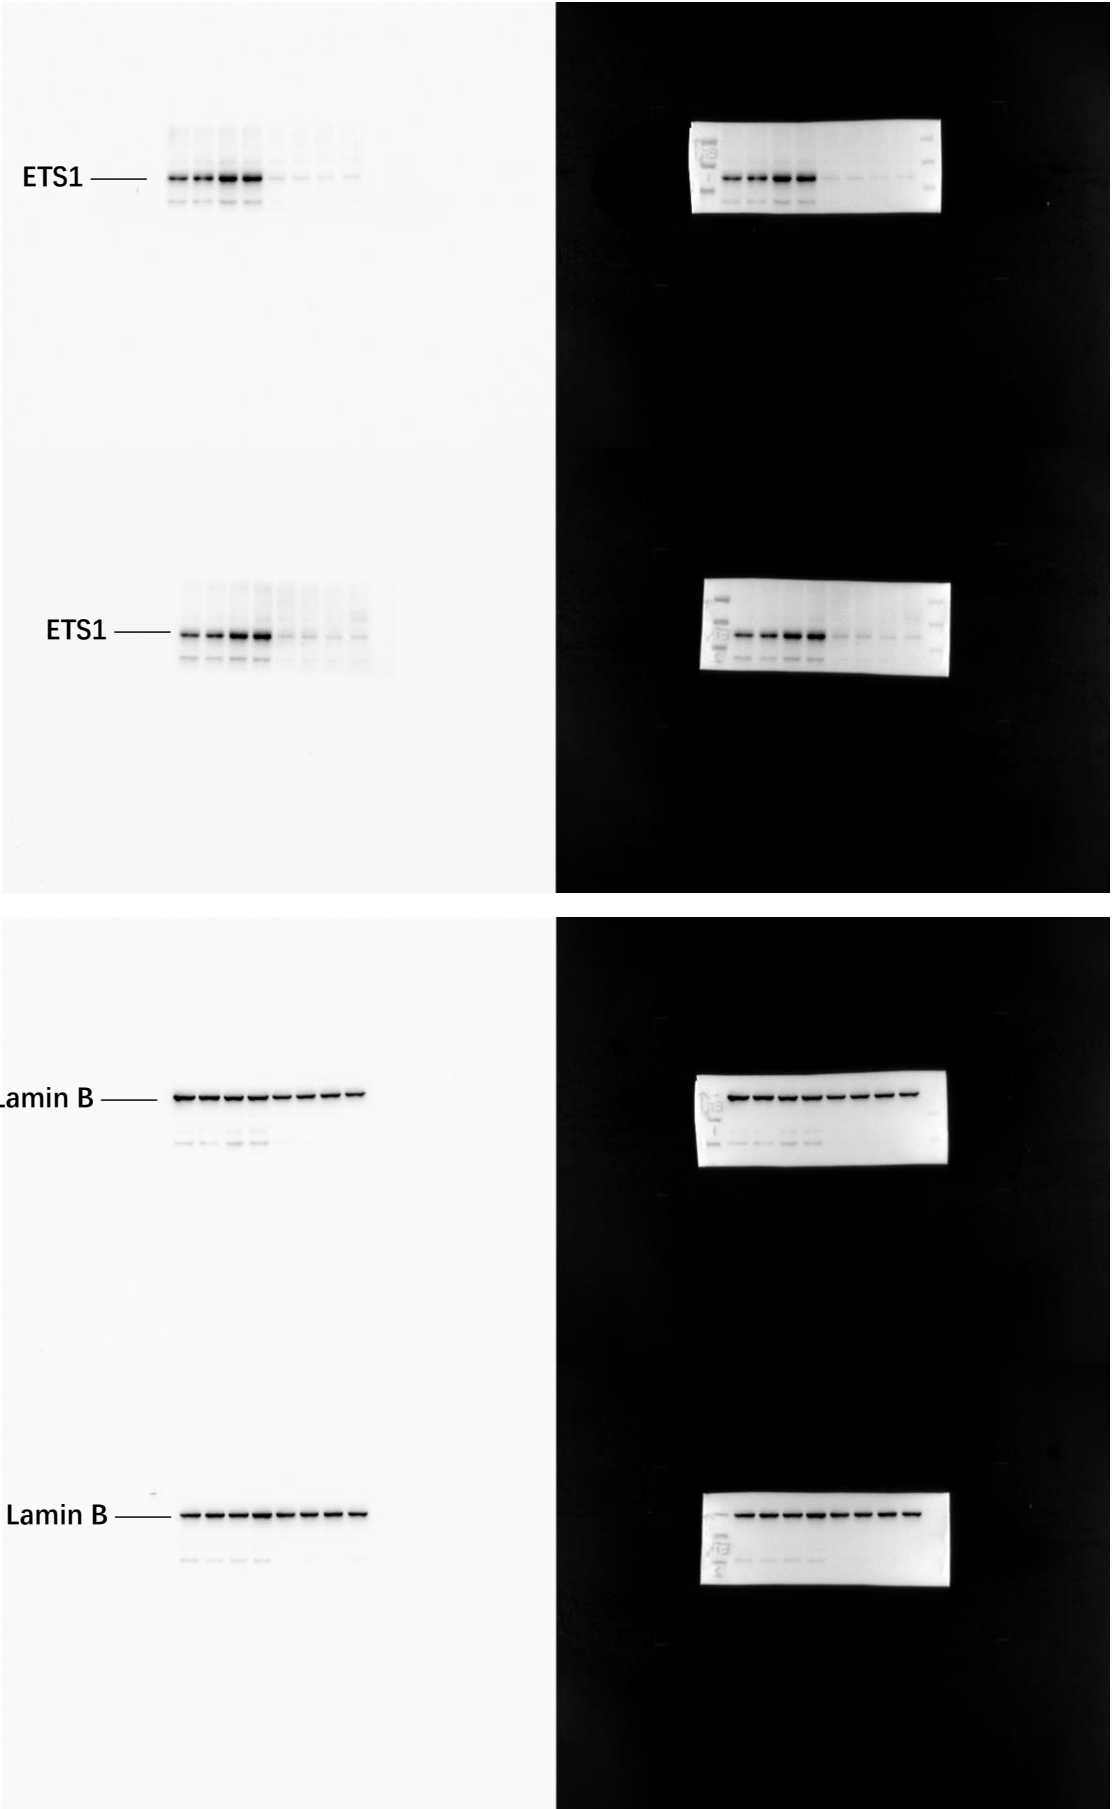

Figure 5G-VE-cadherin

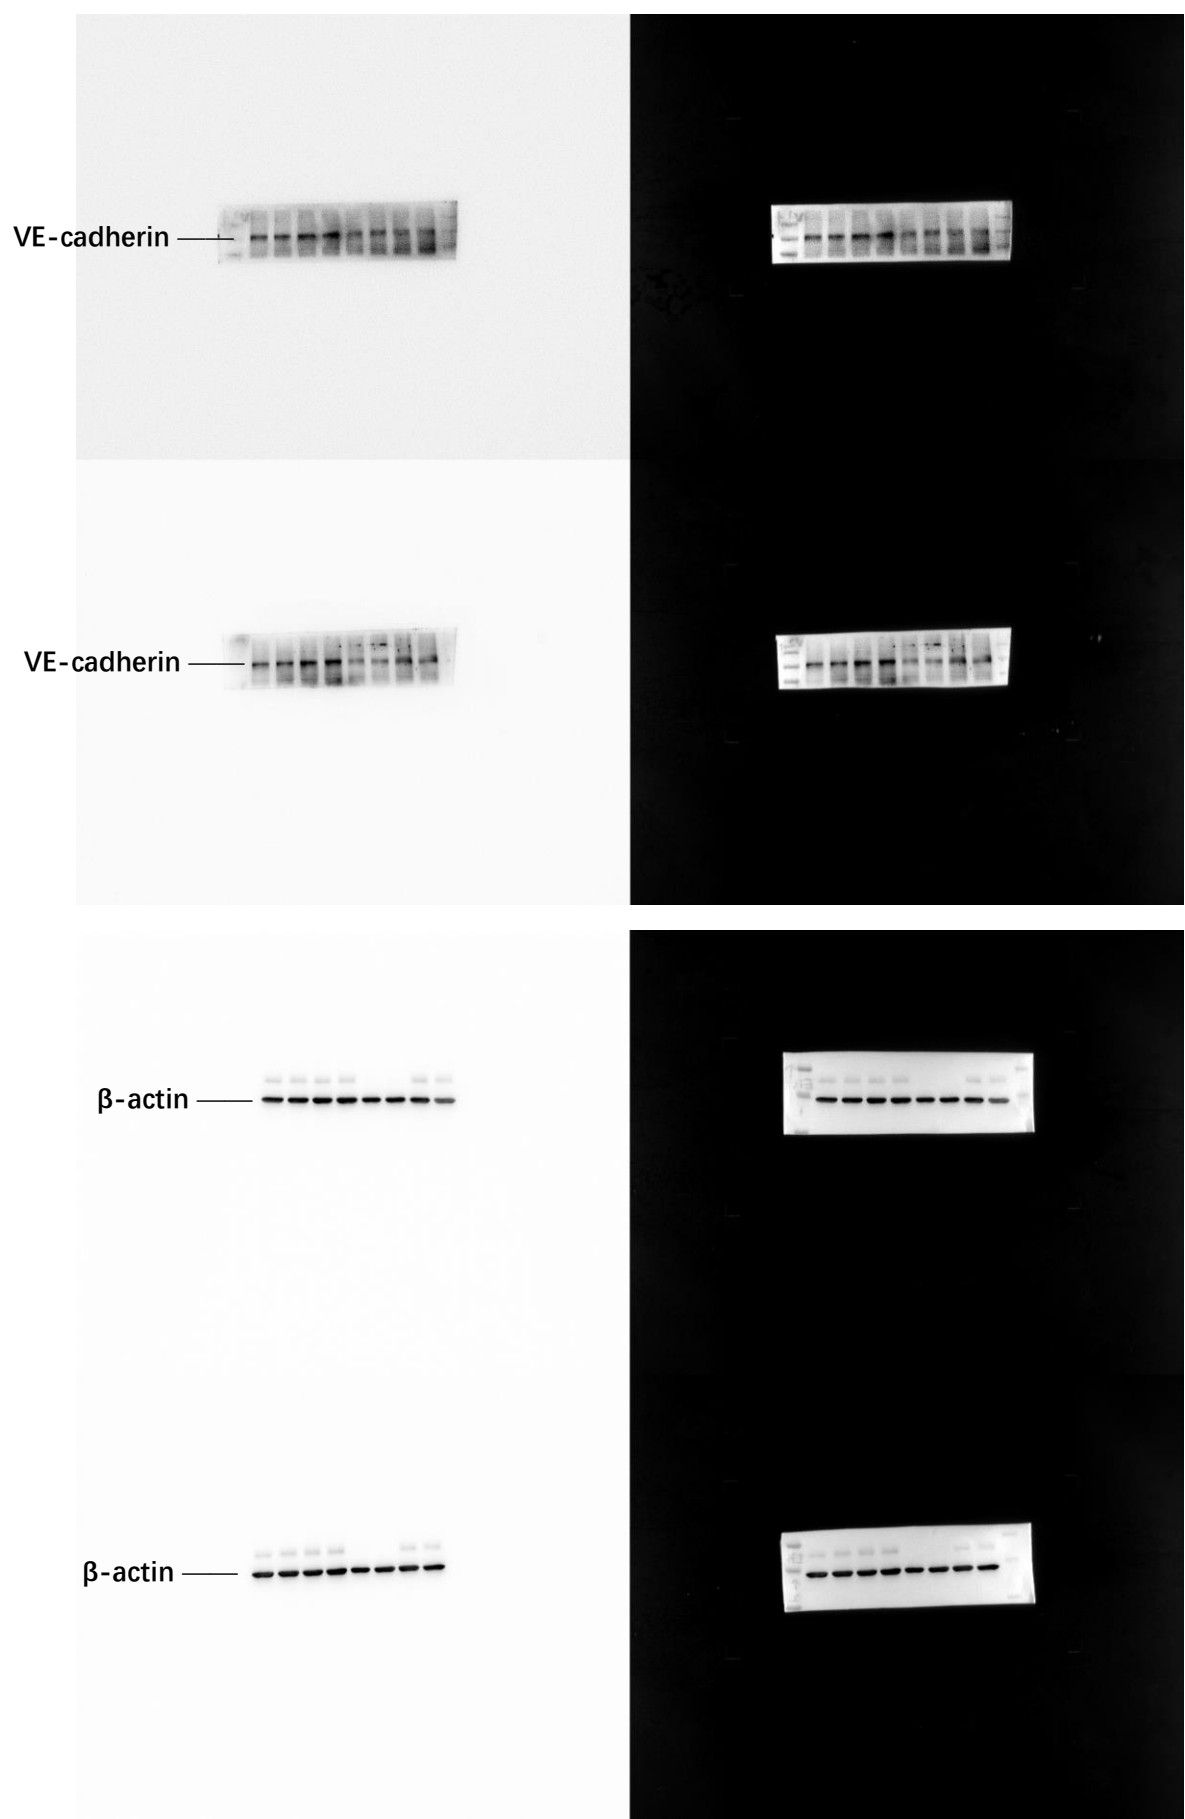

Figure 5G-claudin-5

Claudin-5

Claudin-5

$\beta$ -actin

$\beta$ -actin

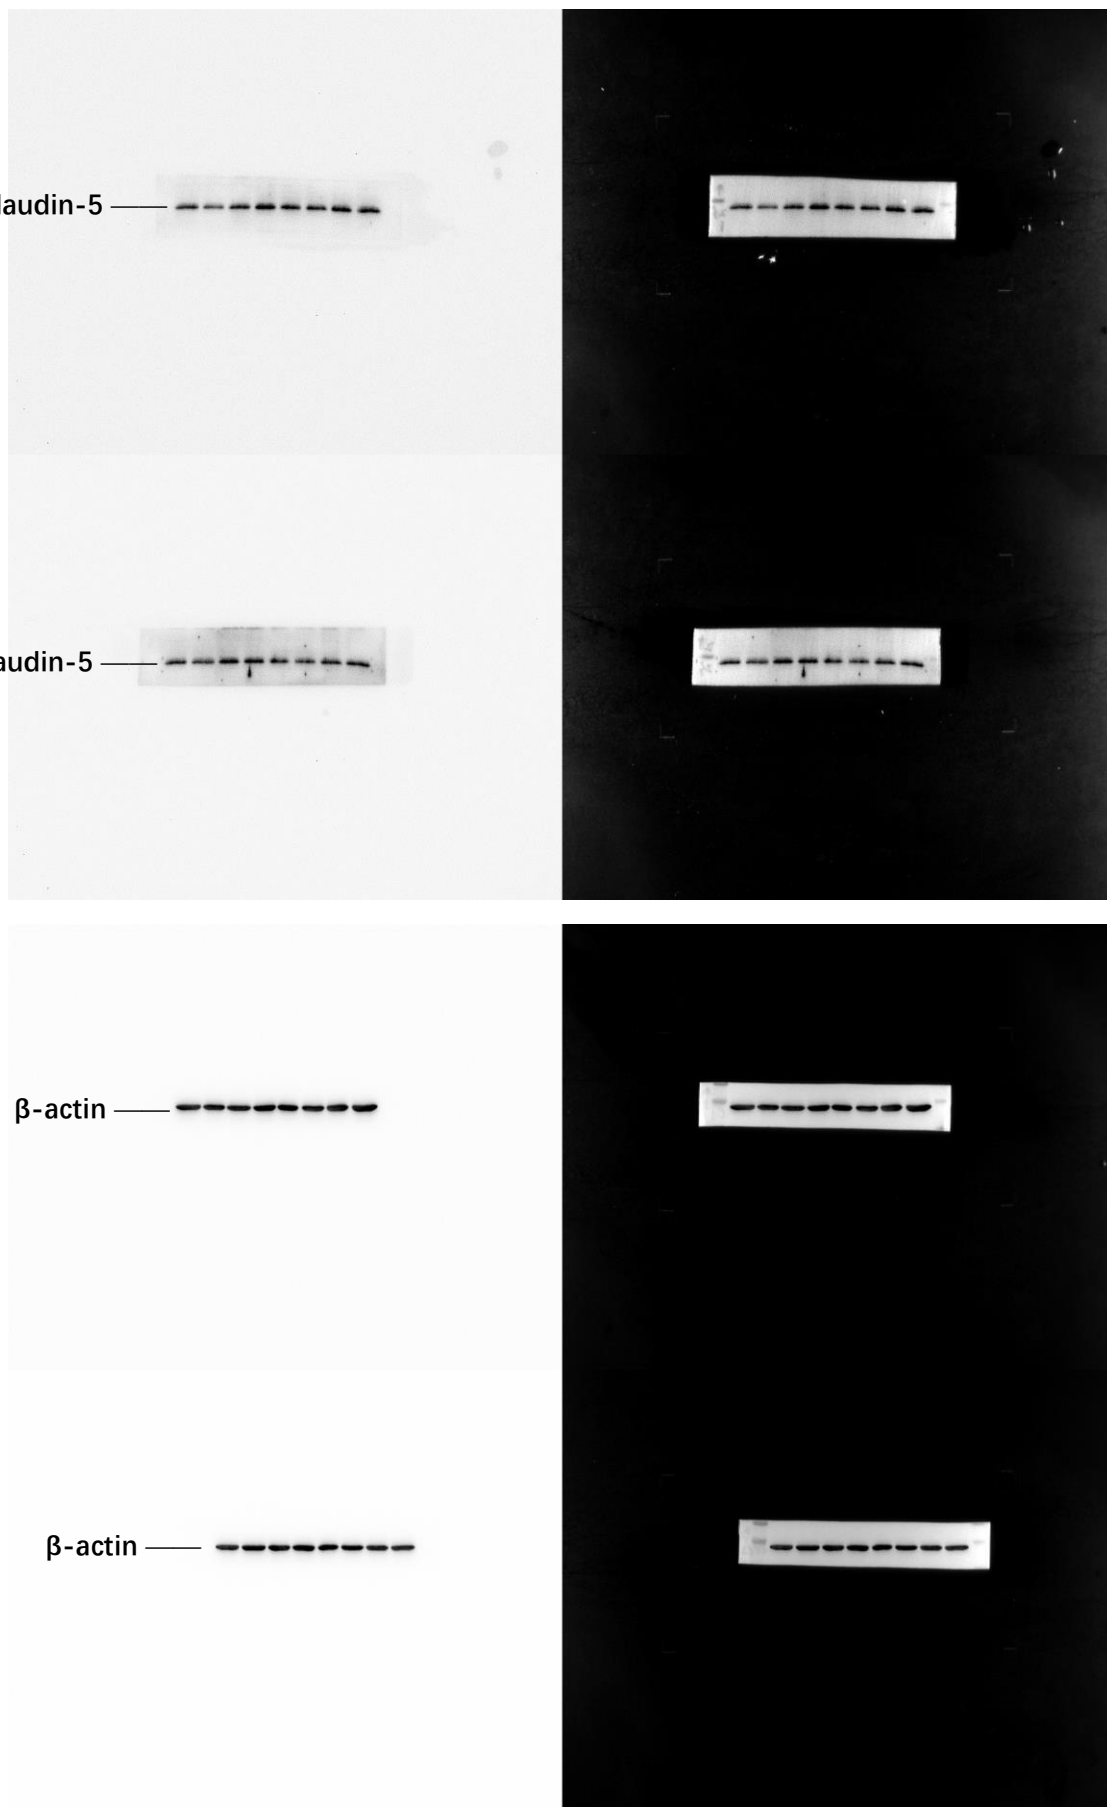

Supplement: fig5-data2 [file elife-96161-fig5-data2-v1.zip]
