# Supplementary material for: Neurons enhance blood–brain barrier function via upregulating claudin-5 and VE-cadherin expression due to glial cell line-derived neurotrophic factor secretion
Source: eLife journal article supplement (doi:10.7554/elife.96161), 2024-05-29

Figure 6B-GDNF, claudin-5

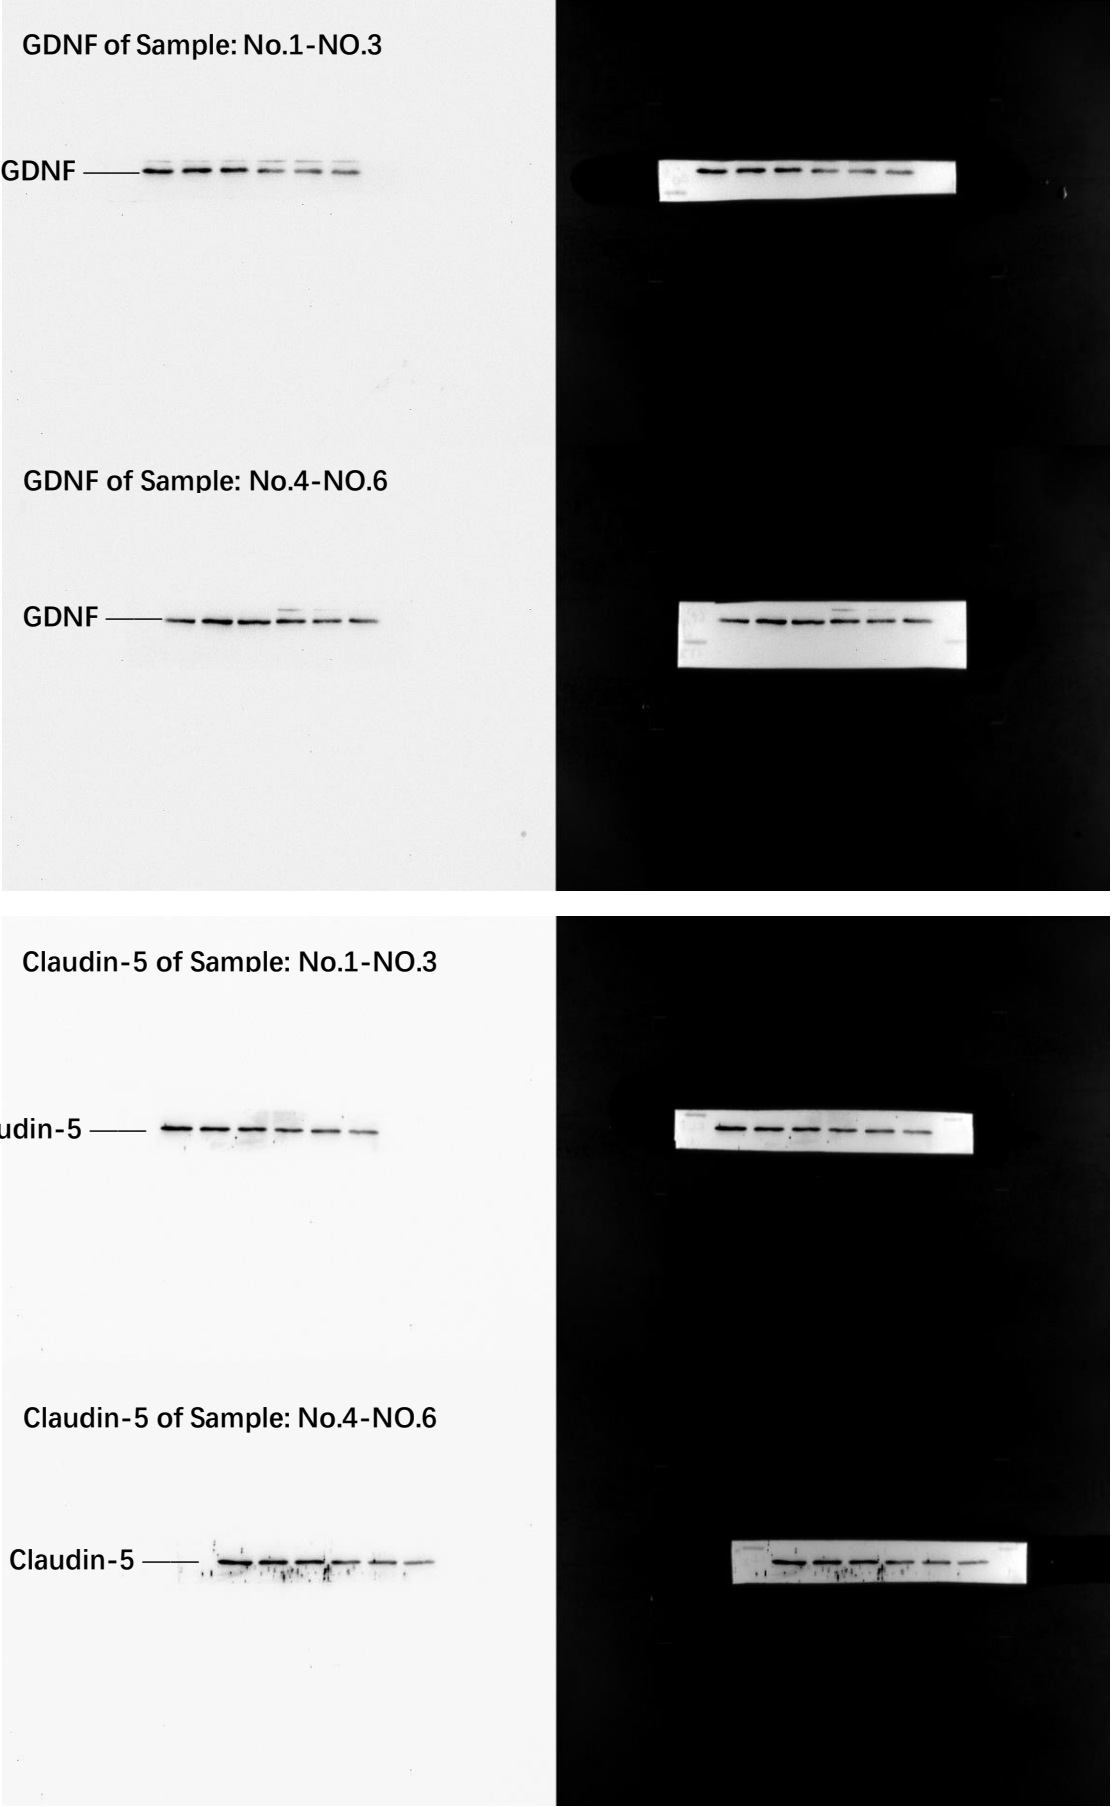

Figure 6B- $\beta$ -actin

$\beta$ -actin for claudin-5 and GDNF of  
Sample: No.1-NO.3

$\beta$ -actin ———

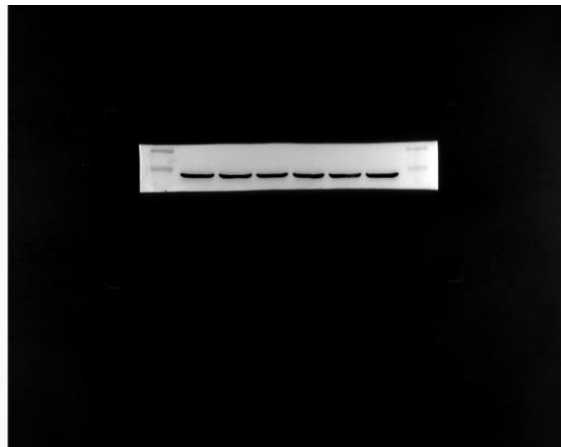

$\beta$ -actin for GDNF of Sample: No.4-NO.6

$\beta$ -actin ———

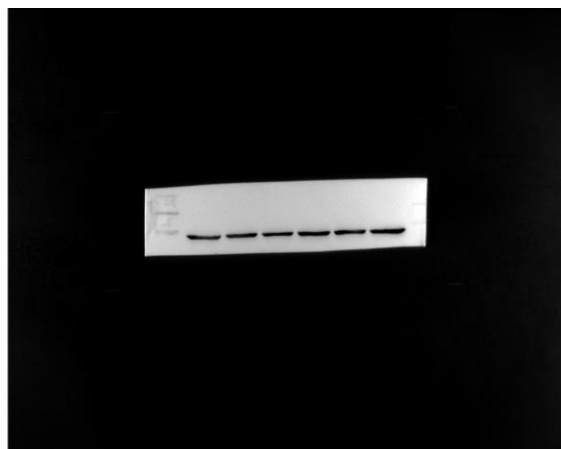

$\beta$ -actin for claudin-5 of Sample: No.4-NO.6

$\beta$ -actin ———

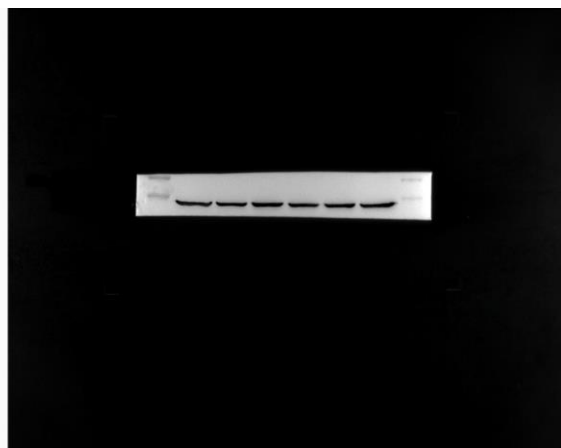

Figure 6B-VE-cadherin

VE-cadherin

VE-cadherin

$\beta$ -actin

$\beta$ -actin

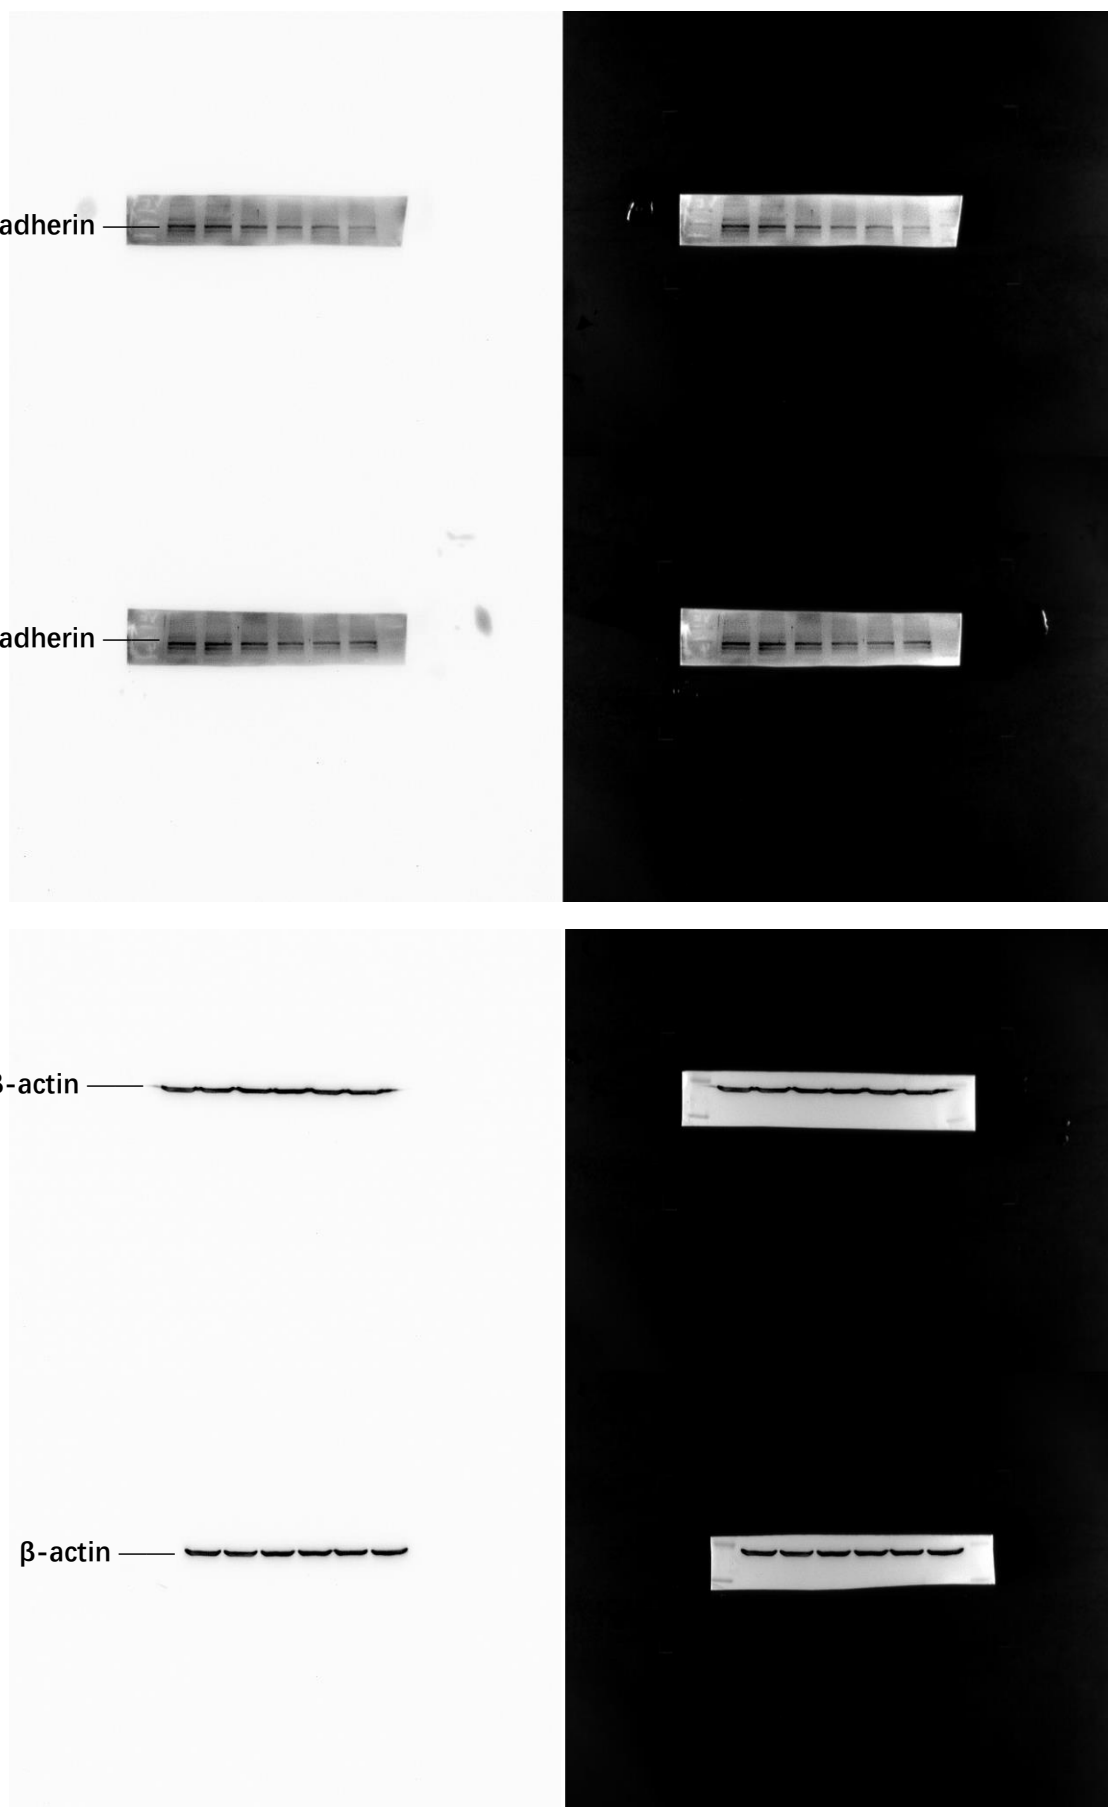

Figure 6I -pAKT/AKT

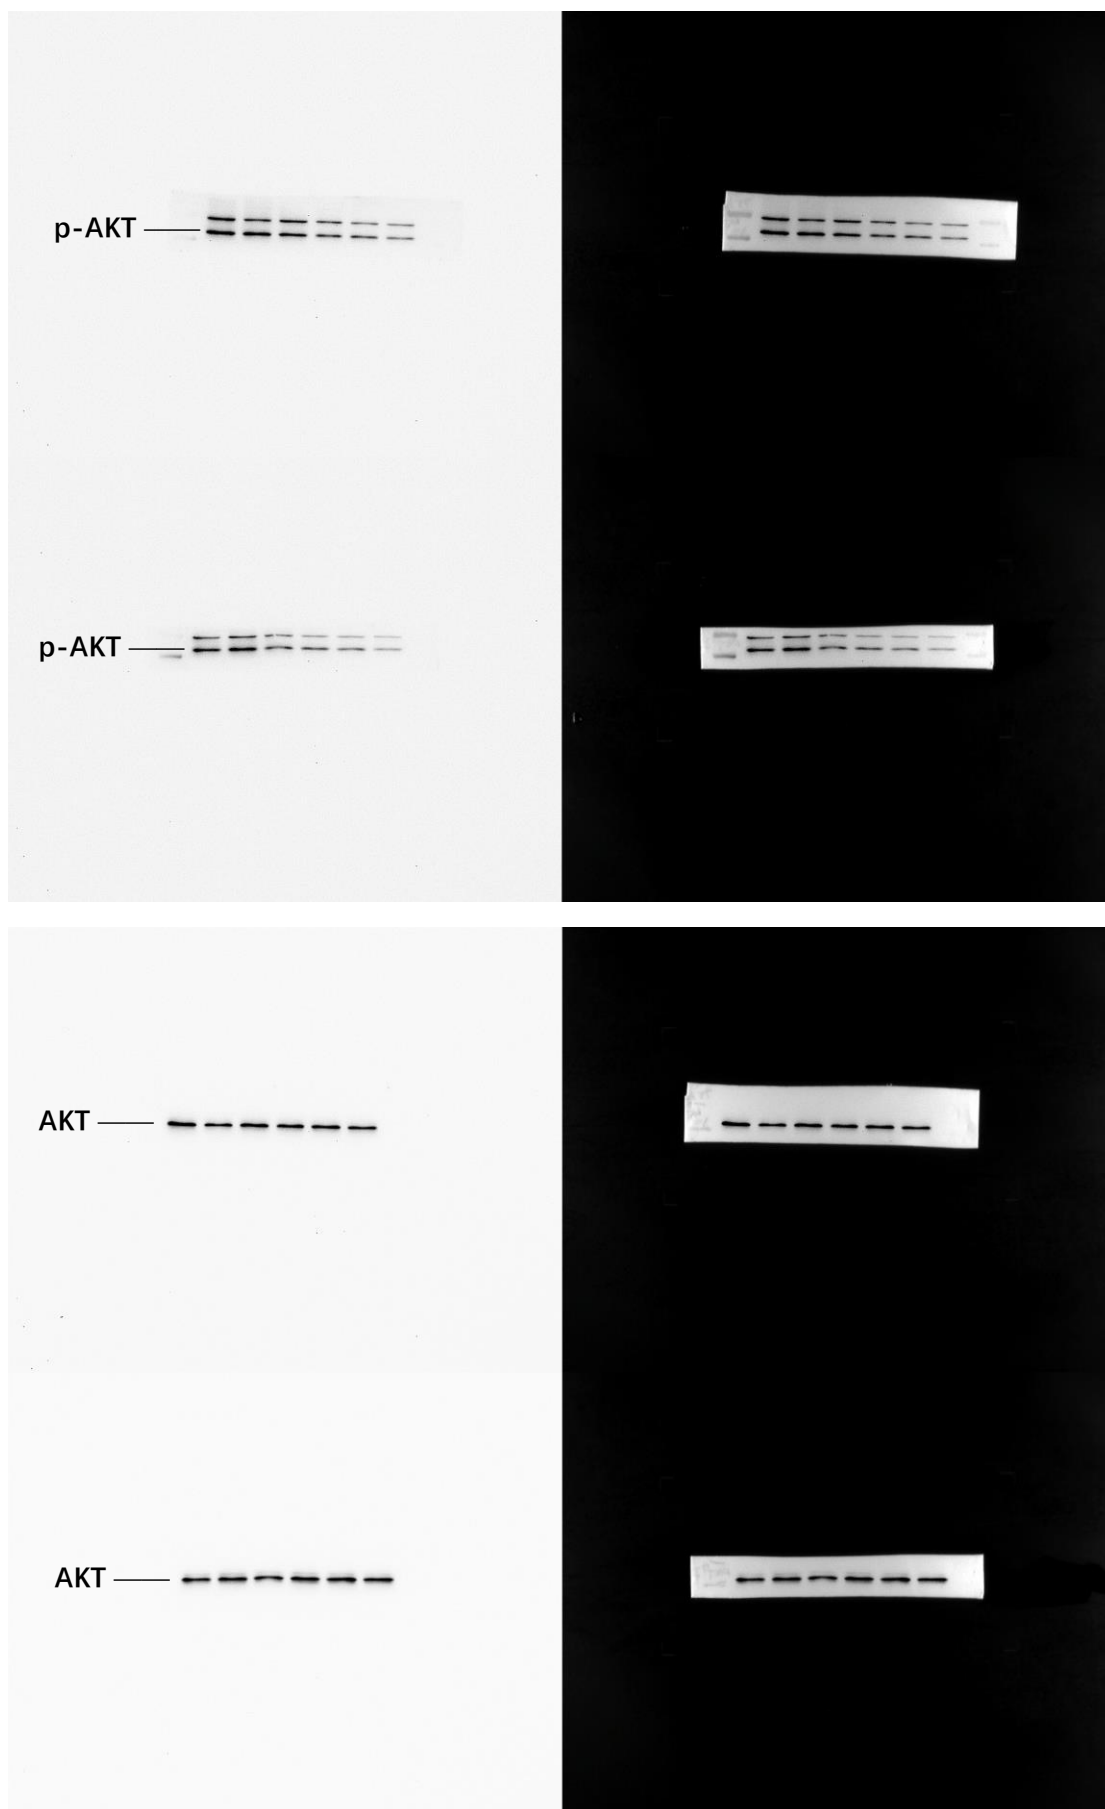

Figure 6J-p-ERK/ERK

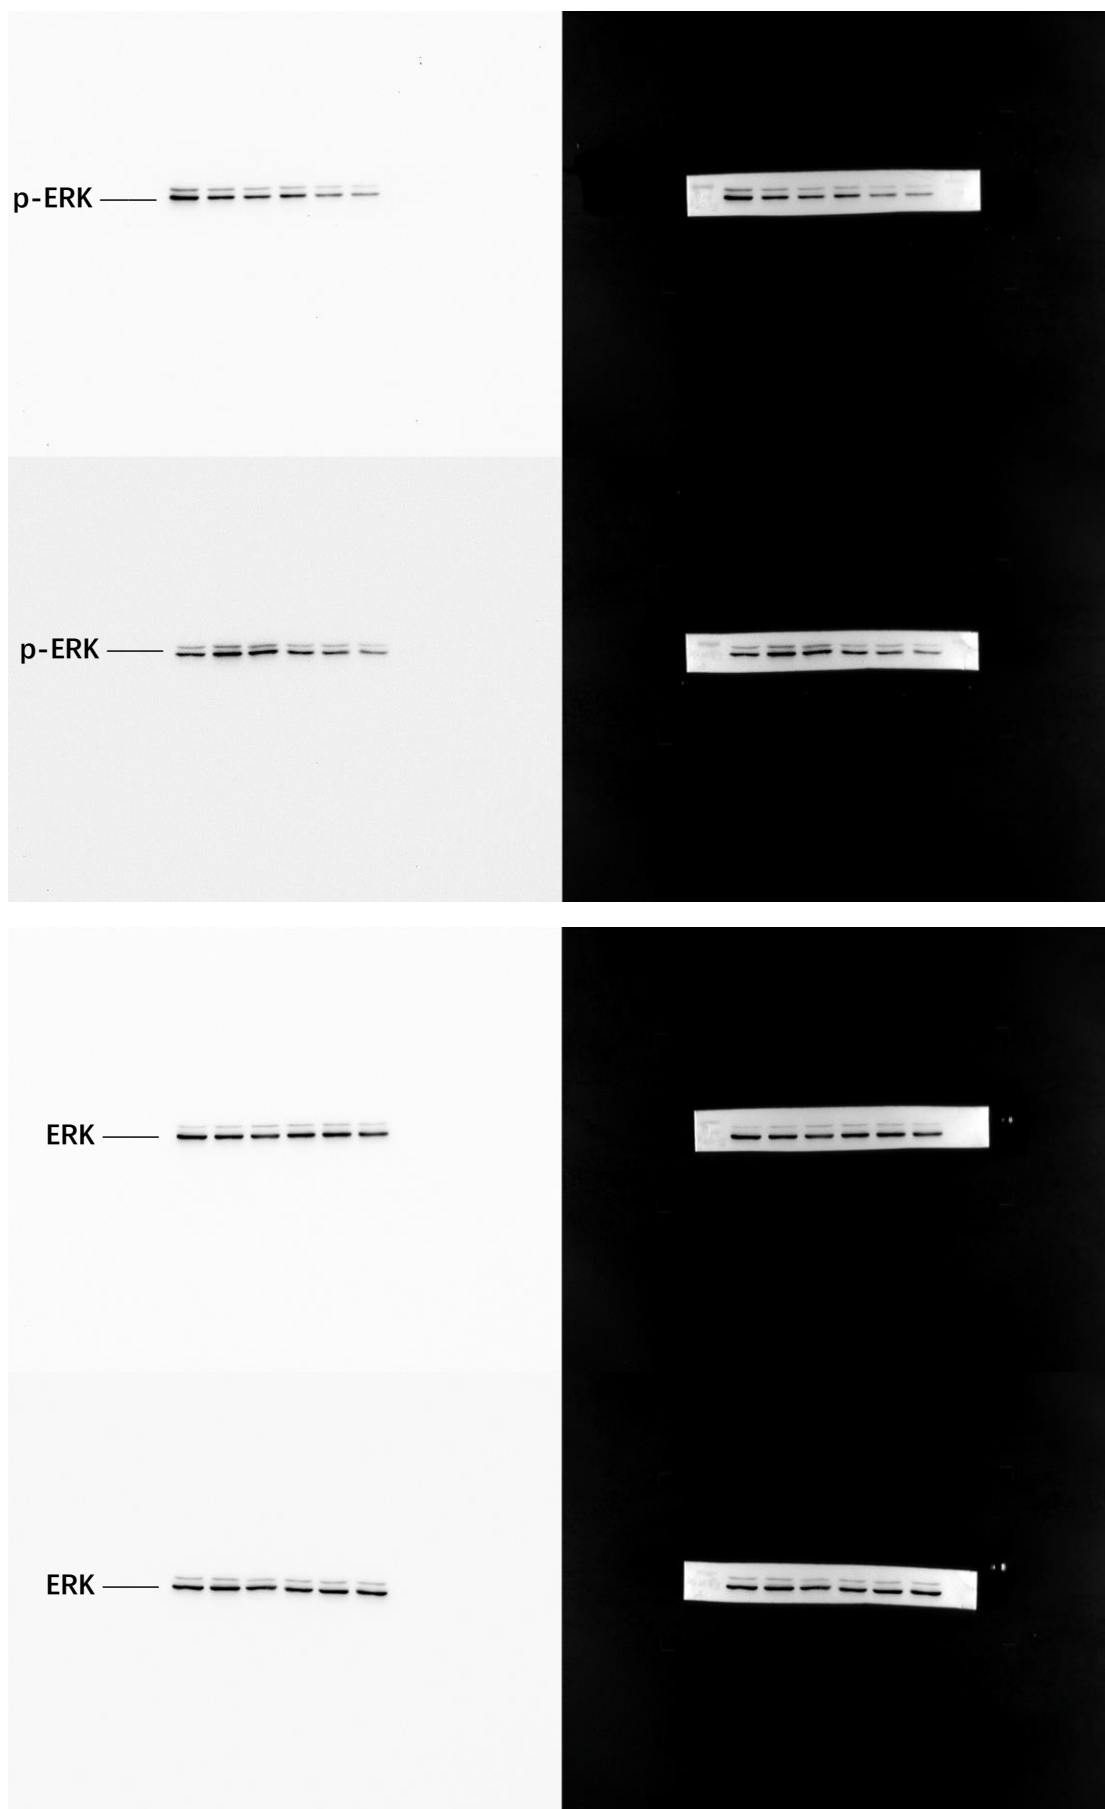

Figure 6I and 6J- $\beta$ -actin

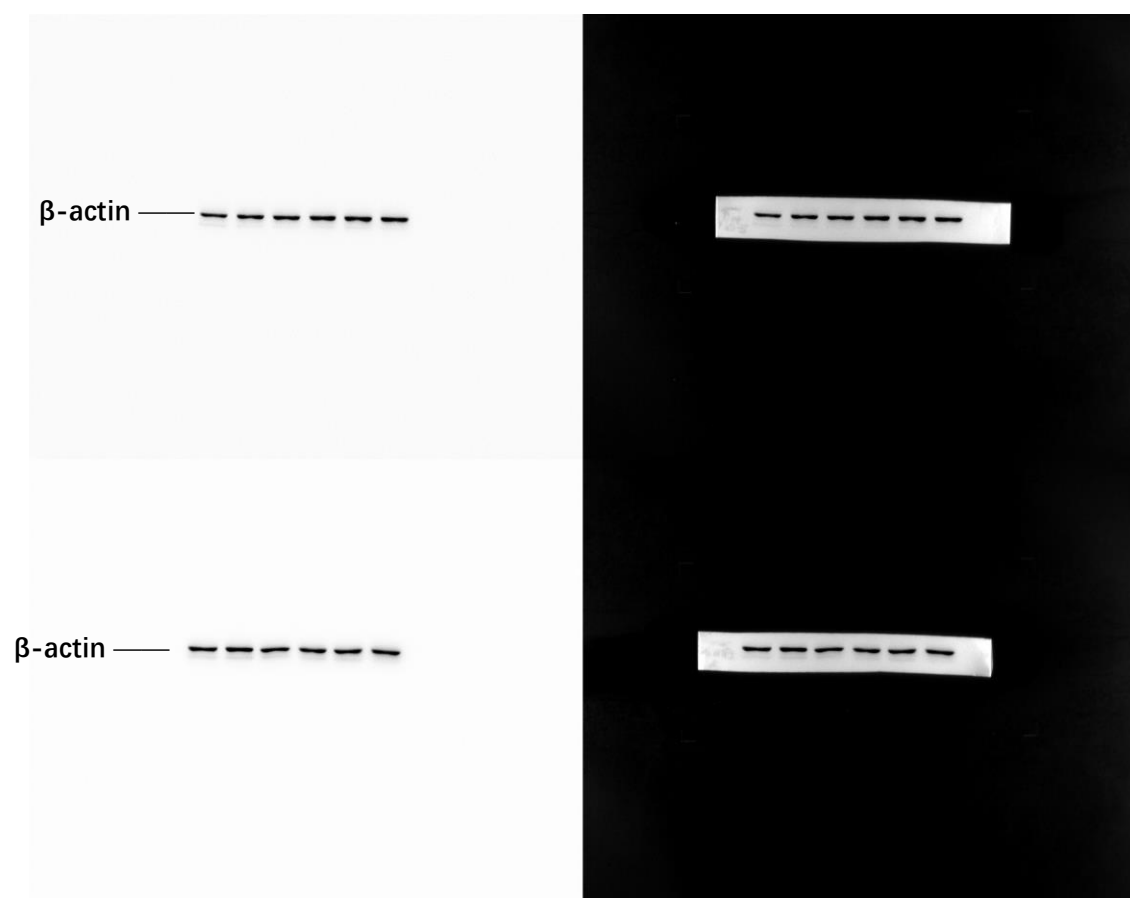

Figure 6K-p-FOXO1/FOXO1

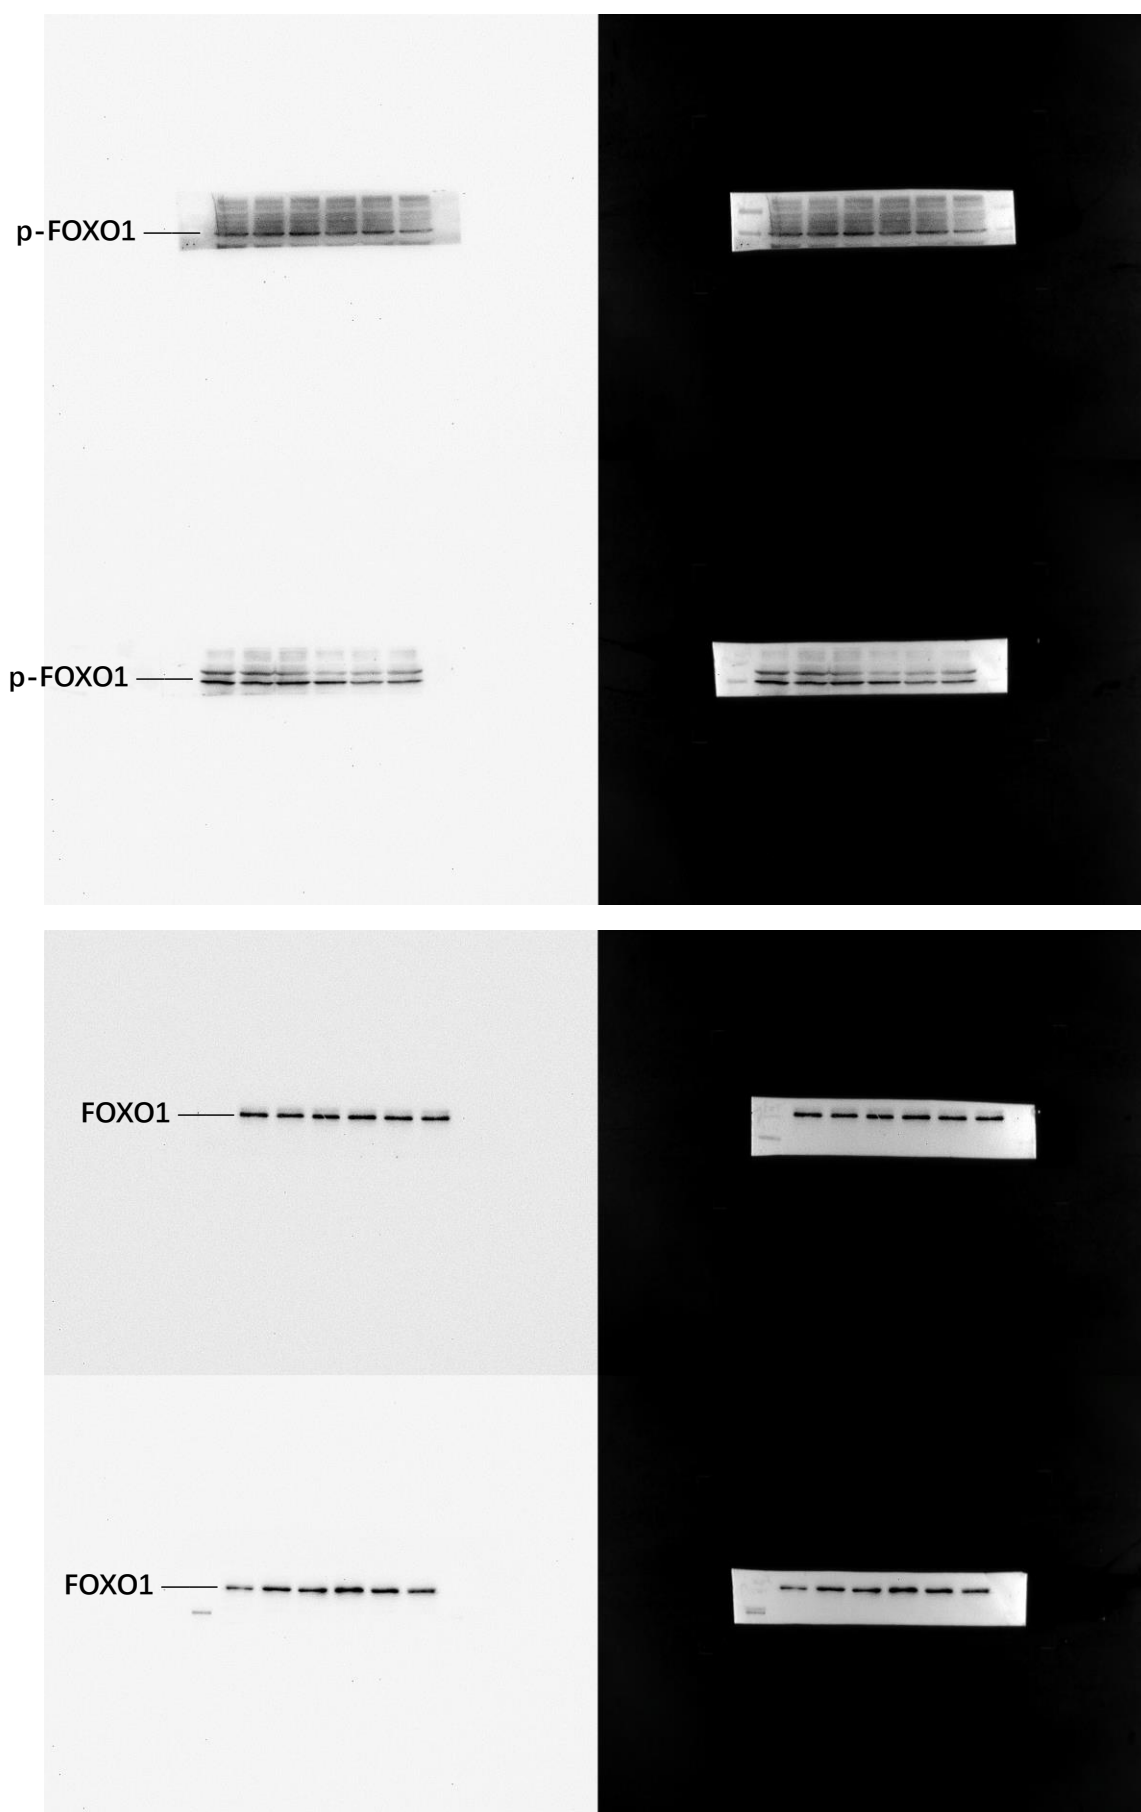

Figure 6K- $\beta$ -actin

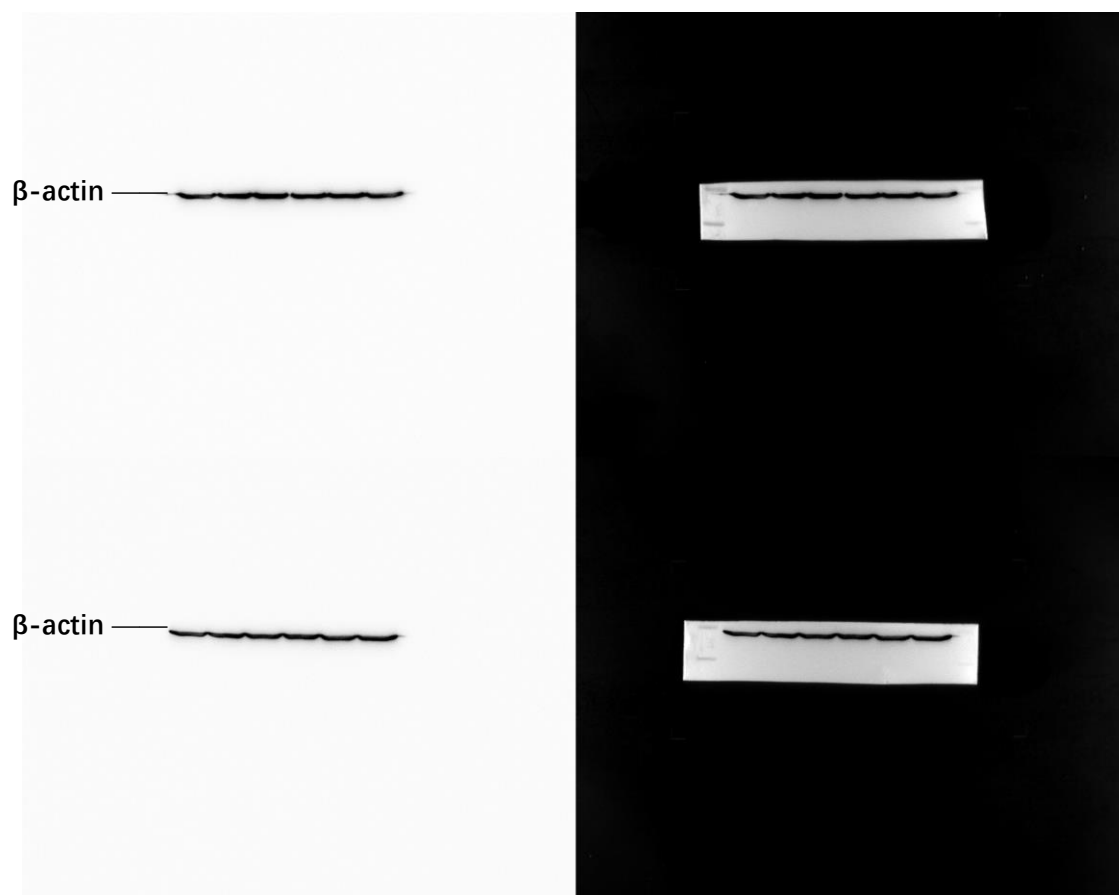



Figure 6K-ETS1

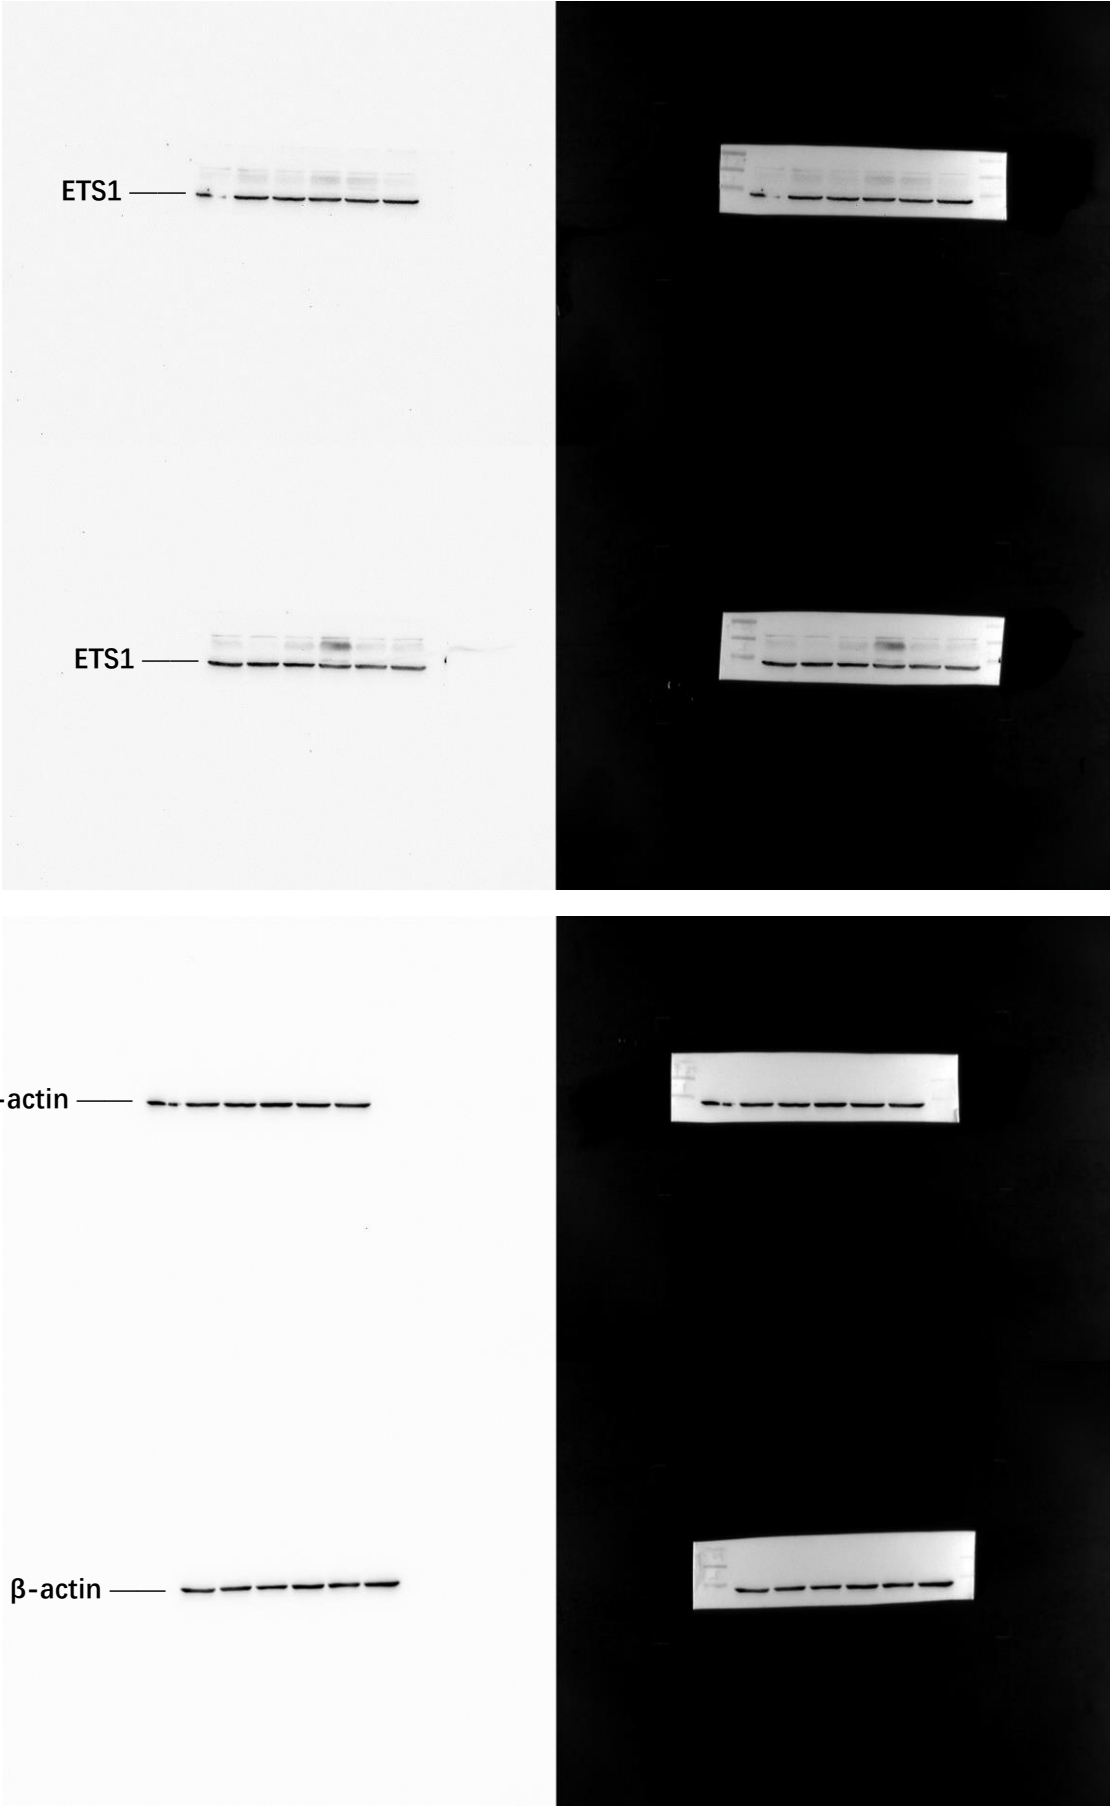

Supplement: fig6-data2 [file elife-96161-fig6-data2-v1.zip]
