# Supplementary material for: Neurons enhance blood–brain barrier function via upregulating claudin-5 and VE-cadherin expression due to glial cell line-derived neurotrophic factor secretion
Source: eLife. 2024 Oct 30;13:RP96161. doi: 10.7554/eLife.96161 (PMC11524583; doi:10.7554/eLife.96161)
Supplement: Figure 1—source data 3. [file elife-96161-fig1-data3.xlsx]

## Sheet: Figure 1-1B
Ω·cm2	h	h+U	h+S	h+S+U	Blank		Figure 1B
Day1	50.82	63.69	53.13	60.39	39.6		Test for normal distribution
	51.81	60.72	55.77	63.69	40.26		Shapiro-Wilk test	h	h+S	h+U	h+S+U
	52.47	61.71	53.46	62.04	40.92		W	0.9833	0.8783	0.8783	0.886
	53.79	59.73	55.11	60.06	40.59		P value	0.9209	0.3315	0.3315	0.3647
Day2	52.14	64.02	57.75	64.68	41.25
	53.46	62.37	54.45	66.33	41.58		Brown-Forsythe test
	53.13	64.02	56.43	65.34	40.92		F (DFn, DFd)	0.6998 (3, 12)
	54.45	62.04	55.44	64.02	40.59		P value	0.57
Day3	56.43	73.59	64.35	75.9	41.58
	58.74	66.66	61.05	78.21	40.92		One way ANOVA tests
	58.08	69.3	63.69	78.54	40.26		Uncorrected Fisher's LSD	Mean Diff.	95.00% CI of diff.	P Value
	59.4	68.97	63.03	76.89	40.26		h vs. h+U	-21.7	-24.92 to -18.47	<0.0001
Day4	63.69	86.13	66	88.44	40.59		h vs. h+S	-6.353	-9.579 to -3.126	0.0011
	66.33	83.49	64.02	90.42	41.91		h vs. h+S+U	-32.92	-36.14 to -29.69	<0.0001
	65.34	87.78	66.66	91.74	41.25		h+U vs. h+S	15.35	12.12 to 18.57	<0.0001
	67.65	82.5	65.67	89.1	39.93		h+U vs. h+S+U	-11.22	-14.45 to -7.994	<0.0001
Day5	71.61	95.7	77.55	98.67	40.26		h+S vs. h+S+U	-26.57	-29.79 to -23.34	<0.0001
	76.23	94.05	75.57	103.29	41.25
	73.59	96.36	78.21	103.95	39.6
	74.25	92.73	76.23	102.96	39.93
Day6	74.25	96.03	80.85	101.97	39.6
	75.57	93.72	78.21	108.9	40.92
	72.6	96.69	81.18	106.26	40.26
	71.28	94.05	78.87	108.24	39.93
Day7	73.59	94.38	79.53	101.97	41.91
	75.24	91.74	78.21	104.61	39.93
	71.28	95.04	78.54	106.92	40.92
	70.62	94.05	81.18	106.26	41.25

## Sheet: Figure1-1D
					Figure 1D
Group	Papp(cm/s)	Mean	SEM		Test for normal distribution
h	3.17059e-05	3.22178e-05	1.89738e-07		Shapiro-Wilk test	h	h+S	h+U	h+S+U
	3.20139e-05				W	0.9458	0.6818	0.8583	0.7913
	3.26657e-05				P value	0.6899	0.007	0.2542	0.0874
	3.24858e-05
h+S	2.32433e-05	2.78268e-05	1.32542e-06		Kruskal-Wallis test
	2.95385e-05				P value	0.0012
	2.94144e-05				P value summary	**
	2.9111e-05				Kruskal-Wallis statistic	11.21
h+U	2.82206e-05	2.90462e-05	4.48285e-07
	3.01932e-05				Uncorrected Dunn's test	Mean rank diff.	P Value
	2.96491e-05				h vs. h+S	7.5	0.0259
	2.81218e-05				h vs. h+U	5.5	0.1023
h+S+U	2.61354e-05	2.48992e-05	6.85316e-07		h vs. h+S+U	11	0.0011
	2.63961e-05				h+S vs. h+U	-2	0.5525
	2.34606e-05				h+S vs. h+S+U	3.5	0.2985
	2.36046e-05				h+U vs. h+S+U	5.5	0.1023

## Sheet: Figure1-1E
					Figure 1E
Group	Papp(cm/s)	Mean	SEM		Test for normal distribution
h	1.24333e-05	1.43367e-05	7.41287e-07		Shapiro-Wilk test	h	h+S	h+U	h+S+U
	1.55843e-05				W	0.8911	0.8957	0.9615	0.8353
	1.33613e-05				P value	0.3883	0.4102	0.7881	0.1822
	1.59681e-05
h+S	1.67761e-05	1.25335e-05	1.40683e-06		Brown-Forsythe test
	1.01947e-05				F (DFn, DFd)	4.161 (3, 12)
	9.79476e-06				P value	0.0309
	1.33682e-05				P value summary	*
h+U	1.0673e-05	8.61371e-06	7.17621e-07
	8.66531e-06				Welch's ANOVA test
	6.6179e-06				W (DFn, DFd)	42.52 (3.000, 6.271)
	8.49865e-06				P value	0.0001
h+S+U	2.99313e-06	2.96703e-06	4.28767e-07		P value summary	***
	1.55854e-06
	3.68482e-06				Dunnett's T3 multiple comparisons test	Mean Diff.	95.00% CI of diff.	P Value
	3.63164e-06				h vs. h+S	1.803	-6.794 to 10.40	0.8836
					h vs. h+U	5.723	0.6093 to 10.84	0.0147
					h vs. h+S+U	11.37	6.740 to 16.00	0.0004
					h+S vs. h+U	3.92	-5.836 to 13.68	0.3484
					h+S vs. h+S+U	9.566	0.4814 to 18.65	0.0208
					h+U vs. h+S+U	5.647	1.127 to 10.17	0.0097

## Sheet: Figure1-1F
Fluorescein Sodium					Fluorescein Sodium
Group	Papp(cm/s)	Mean	SEM		Test for normal distribution
Blank	6.87438e-05	7.15463e-05	8.16133e-07		Shapiro-Wilk test	Blank	hCMEC/D3	U251
	7.27119e-05				W	0.7364	0.8418	0.9685
	7.21358e-05				P value	0.0286	0.2008	0.8319
	7.25938e-05
hCEMC/D3	3.48312e-05	3.57311e-05	2.68035e-07		Kruskal-Wallis test
	3.5969e-05				P value	0.0002
	3.6241e-05				P value summary	***
	3.58832e-05				Kruskal-Wallis statistic	9.846
U251	2.95178e-05	3.05599e-05	4.25787e-07
	3.06091e-05				Uncorrected Dunn's test	Mean rank diff.	P Value
	3.18686e-05				Blank vs. hCMEC/D3	4	0.1167
	3.02442e-05				Blank vs. U251	8	0.0017
FITC-Dextran
Group	Papp(cm/s)	Mean	SEM		FITC-Dextran
Blank	3.17343e-05	3.22863e-05	7.94646e-07		Test for normal distribution
	3.36682e-05				Shapiro-Wilk test	Blank	hCMEC/D3	U251
	2.9929e-05				W	0.8849	0.9165	0.7985
	3.38135e-05				P value	0.3601	0.5174	0.0996
hCEMC/D3	6.62913e-06	6.57171e-06	1.88267e-08
	6.5413e-06				Brown-Forsythe test
	6.5815e-06				F (DFn, DFd)	9.722 (2, 9)
	6.53492e-06				P value	0.0056
U251	5.37857e-06	5.51722e-06	7.02085e-08		P value summary	**
	5.68035e-06
	5.63291e-06				Welch's ANOVA test
	5.37705e-06				W (DFn, DFd)	411.3 (2.000, 4.299)
					P value	<0.0001
					P value summary	****
					Dunnett's T3 multiple comparisons test	Mean Diff.	95.00% CI of diff.	P Value
					Blank vs. hCMEC/D3	25.72	20.46 to 30.97	0.0002

## Sheet: Figure1-1G
					Figure 1G
Group	*103 cell/cm2	Mean	SEM		Test for normal distribution
h	176.589	179.131	2.5207		Shapiro-Wilk test	h	h+S	h+U	h+S+U
	185.275				W	0.8305	0.767	0.9287	0.9067
	175.53				P value	0.1895	0.038	0.4837	0.4072
h+S	192.691	189.513	2.5088
	183.369				Kruskal-Wallis test
	192.479				P value	0.0137
h+U	189.619	187.394	1.29548		P value summary	*
	184.322				Kruskal-Wallis statistic	8.231
	188.242
h+S+U	194.28	197.775	2.12393		Uncorrected Dunn's test	Mean rank diff.	P Value
	202.86				h vs. h+S	-4	0.1742
	196.186				h vs. h+U	-3	0.3082
					h vs. h+S+U	-8.333	0.0046
					h+S vs. h+U	1	0.7341
					h+S vs. h+S+U	-4.333	0.141
					h+U vs. h+S+U	-5.333	0.07

## Sheet: Figure1-1H
							Figure 1H
Group	P1	P2	Mean : Edu	Edu +	Edu -		Test for normal distribution
	Freq. of Parent	Freq. of Parent	Mean	Freq. of Parent	Freq. of Parent		Shapiro-Wilk test	h	h+S	h+U	h+S+U
h	90.8	96.3	2163	22	78		W	0.953	0.9868	0.75	0.75
	88.2	96.1	1607	21.1	78.9		P value	0.5827	0.7804	ns	ns
	87.8	96.3	1588	20.7	79.3
h+S	87	93.9	2881	24.7	75.3		Brown-Forsythe test
	87.2	94.3	2910	25.3	74.7		F (DFn, DFd)	0.3455 (3, 8)
	85.5	94.3	2749	24.3	75.7		P value	0.7935
h+U	84	96	1508	22	78		P value summary	ns
	91.2	96.1	2305	23.1	76.9
	90.8	96.3	2163	22	78		One way ANOVA tests
h+S+U	86.3	94.3	3332	27.4	72.6		Uncorrected Fisher's LSD	Mean Diff.	95.00% CI of diff.	P Value
	86.2	94.9	3285	27.4	72.6		h vs. h+S	-3.5	-4.501 to -2.499	<0.0001
	85.2	95	2444	27.1	72.9		h vs. h+U	-1.1	-2.101 to -0.09925	0.035
							h vs. h+S+U	-6.033	-7.034 to -5.033	<0.0001
							h+S vs. h+U	2.4	1.399 to 3.401	0.0006
							h+S vs. h+S+U	-2.533	-3.534 to -1.533	0.0004
							h+U vs. h+S+U	-4.933	-5.934 to -3.933	<0.0001

## Sheet: Figure1-1I
					Figure 1I
Group	Cell vailiabity	Mean	SEM		Test for normal distribution
h	1.01575	1	0.00982682		Shapiro-Wilk test	h	h+S	h+U	h+S+U
	0.984189				W	0.8716	0.9317	0.9002	0.9417
	1.02291				P value	0.3042	0.6045	0.432	0.6645
	0.97715
h+S	1.12373	1.11577	0.00790643		Brown-Forsythe test
	1.09047				F (DFn, DFd)	0.7764 (3, 12)
	1.1159				P value	0.5294
	1.13299				P value summary	ns
h+U	1.13963	1.07413	0.0290876
	1.08598				One way ANOVA tests
	0.980158				Uncorrected Fisher's LSD	Mean Diff.	95.00% CI of diff.	P Value
	1.09075				h vs. h+S	-0.1158	-0.1730 to -0.05853	0.0009
h+S+U	1.16574	1.15841	0.00550227		h vs. h+U	-0.07413	-0.1314 to -0.01688	0.0154
	1.14156				h vs. h+S+U	-0.1584	-0.2157 to -0.1012	<0.0001
	1.17029
	1.15604

## Sheet: Figure1-1J
2^(-△△Ct)
Group	Claudin-5	Occludin	ZO-1	VE-Cadherin	β-Catenin		Claudin-5						Occludin						ZO-1
h	0.648112	0.658483	0.68109	0.969765	0.978699		Test for normal distribution						Test for normal distribution						Test for normal distribution
	1.49011	1.06667	1.24725	1.22228	0.982666		Shapiro-Wilk test	h	h+S	h+U	h+S+U		Shapiro-Wilk test	h	h+S	h+U	h+S+U		Shapiro-Wilk test	h	h+S	h+U	h+S+U
	1.12139	1.23093	1.1466	0.93433	1.0323		W	0.9942	0.9353	0.9754	0.8746		W	0.8519	0.8507	0.9886	0.9209		W	0.9171	0.8909	0.8229	0.9071
	0.923366	1.15663	1.02667	0.902949	1.00726		P value	0.9777	0.6259	0.8743	0.3162		P value	0.2324	0.2283	0.9501	0.5419		P value	0.5206	0.3872	0.1499	0.4672
h+S	2.06747	0.789576	1.1989	1.39455	1.28254
	2.33588	0.761469	1.18066	1.34827	1.1396		Brown-Forsythe test						Brown-Forsythe test						Brown-Forsythe test
	2.25841	0.694396	1.21644	1.35064	1.26883		F (DFn, DFd)	0.3376 (3, 12)					F (DFn, DFd)	1.654 (3, 12)					F (DFn, DFd)	2.958 (3, 12)
	1.79381	0.692396	1.1116	1.23949	1.29464		P value	0.7985					P value	0.2294					P value	0.0752
h+U	1.76267	1.13457	1.00073	1.63231	1.02203
	1.93611	1.23493	1.14056	2.45387	1.61029		One way ANOVA tests						One way ANOVA tests						One way ANOVA tests
	2.32809	1.01535	1.13832	1.6872	0.796933		Uncorrected Fisher's LSD	Mean Diff.	95.00% CI of diff.	P Value			Uncorrected Fisher's LSD	Mean Diff.	95.00% CI of diff.	P Value			Uncorrected Fisher's LSD	Mean Diff.	95.00% CI of diff.	P Value
	2.03623	0.889913	0.962644	1.53956	1.17277		h vs. h+S	-1.068	-1.599 to -0.5377	0.0009			h vs. h+S	0.2937	0.06130 to 0.5261	0.0175			h vs. h+S	-0.1515	-0.3576 to 0.05467	0.1354
h+S+U	2.70239	0.953382	1.2553	2.55249	1.1901		h vs. h+U	-0.97	-1.500 to -0.4396	0.0018			h vs. h+U	-0.0405	-0.2729 to 0.1919	0.7108			h vs. h+U	-0.03513	-0.2413 to 0.1710	0.7169
	3.59488	0.962144	1.28078	2.38461	1.19002		h vs. h+S+U	-1.854	-2.384 to -1.323	<0.0001			h vs. h+S+U	0.07778	-0.1546 to 0.3102	0.4799			h vs. h+S+U	-0.2404	-0.4466 to -0.03428	0.0259
	2.48155	0.903455	1.27004	2.25633	1.2261
	2.81899	0.982566	1.25728	2.04783	1.38249
							VE-Cadherin						β-Catenin
							Test for normal distribution						Test for normal distribution
							Shapiro-Wilk test	h	h+S	h+U	h+S+U		Shapiro-Wilk test	h	h+S	h+U	h+S+U
							W	0.7959	0.877	0.7619	0.9967		W	0.9059	0.7621	0.9653	0.7563
							P value	0.095	0.3261	0.0496	0.9888		P value	0.4607	0.0498	0.8119	0.0442
							Kruskal-Wallis test						Kruskal-Wallis test
							P value	<0.0001					P value	0.0557
							P value summary	****					P value summary	ns
							Kruskal-Wallis statistic	13.26					Kruskal-Wallis statistic	7.081
							Uncorrected Dunn's test	Mean rank diff.	P Value				Uncorrected Dunn's test	Mean rank diff.	P Value
							h vs. h+S	-4	0.2348				h vs. h+S	-7.75	0.0213
							h vs. h+U	-8.75	0.0093				h vs. h+U	-3.75	0.2653
							h vs. h+S+U	-11.25	0.0008				h vs. h+S+U	-7.5	0.0259

## Sheet: Figure1-1K
2^(-△△Ct)								P-gp						BCRP						OCT1
Group	P-gp	BCRP	OCT1	OCT2	OAT3	OATP1A1		Test for normal distribution						Test for normal distribution						Test for normal distribution
h	0.751375	1.11424	0.735227	0.88487	0.829343	0.614258		Shapiro-Wilk test	h	h+S	h+U	h+S+U		Shapiro-Wilk test	h	h+S	h+U	h+S+U		Shapiro-Wilk test	h	h+S	h+U	h+S+U
	1.4407	0.886462	1.18431	0.667822	1.42144	1.13369		W	0.8355	0.7531	0.8773	0.9545		W	0.9897	0.9174	0.7972	0.8791		W	0.9293	0.8885	0.9104	0.8212
	0.703745	0.989954	0.911162	1.29238	0.626689	1.22394		P value	0.1825	0.0413	0.327	0.7444		P value	0.9559	0.5226	0.0973	0.3347		P value	0.5904	0.3762	0.4843	0.1461
	1.31267	1.0227	1.26043	1.30939	1.35358	1.17326
h+S	1.04674	1.92887	1.02883	1.24411	2.48614	0.834422		Kruskal-Wallis test						Brown-Forsythe test						Brown-Forsythe test
	0.829117	1.75152	0.913654	1.23205	1.09966	0.779417		P value	0.2482					F (DFn, DFd)	5.668 (3, 12)					F (DFn, DFd)	5.294 (3, 12)
	1.05076	2.11173	1.25244	1.33297	1.43898	0.710555		P value summary	ns					P value	0.0118					P value	0.0148
	1.01226	2.15023	1.28027	1.37005	1.5661	0.684046		Kruskal-Wallis statistic	4.257					P value summary	*					P value summary	*
h+U	0.885087	2.64149	1.04843	1.25566	1.29154	1.52
	0.937377	2.6677	0.978345	1.30988	1.2423	1.7752		Uncorrected Dunn's test	Mean rank diff.	P Value				Welch's ANOVA test						Welch ANOVA test
	1.08	2.18848	0.903063	1.07186	0.959267	1.12368		h vs. h+S	1.75	0.6032				W (DFn, DFd)	71.88 (3.000, 6.322)					W (DFn, DFd)	2.753 (3.000, 5.939)
	0.861376	2.13398	0.915402	1.02565	1.13968	1.0678		h vs. h+U	2.25	0.5039				P value	<0.0001					P value	0.1355
h+S+U	1.08617	1.95481	1.33703	1.15114	0.396066	1.28665		h vs. h+S+U	-4	0.2348				P value summary	****
	1.12805	2.23562	1.30666	1.36564	1.27625	1.39375														Dunnett's T3 multiple comparisons test	Mean Diff.	95.00% CI of diff.	P Value
	1.1717	1.99875	1.08341	1.41185	1.30613	1.36972								Dunnett's T3 multiple comparisons test	Mean Diff.	95.00% CI of diff.	P Value			h vs. h+S	-0.09603	-0.8007 to 0.6086	0.98
	1.103	2.04559	1.05742	1.35753	1.28749	1.32676								h vs. h+S	-0.9822	-1.534 to -0.4308	0.003			h vs. h+U	0.06147	-0.7878 to 0.9108	0.9929
														h vs. h+U	-1.405	-2.210 to -0.5996	0.0032			h vs. h+S+U	-0.1734	-0.8379 to 0.4912	0.7693
														h vs. h+S+U	-1.055	-1.389 to -0.7220	<0.0001
								OCT2						OAT3						OATP1A1
								Test for normal distribution						Test for normal distribution						Test for normal distribution
								Shapiro-Wilk test	h	h+S	h+U	h+S+U		Shapiro-Wilk test	h	h+S	h+U	h+S+U		Shapiro-Wilk test	h	h+S	h+U	h+S+U
								W	0.866	0.882	0.8907	0.8062		W	0.8764	0.9005	0.9299	0.6561		W	0.7497	0.9497	0.9	0.9702
								P value	0.2822	0.3473	0.3862	0.1139		P value	0.3234	0.4335	0.594	0.0031		P value	0.0384	0.7145	0.4311	0.8428
								Brown-Forsythe test						Kruskal-Wallis test						Kruskal-Wallis test
								F (DFn, DFd)	6.525 (3, 12)					P value	0.2981					P value	0.0166
								P value	0.0073					P value summary	ns					P value summary	*
								P value summary	**					Kruskal-Wallis statistic	3.816					Kruskal-Wallis statistic	8.735
								Welch ANOVA test						Uncorrected Dunn's test	Mean rank diff.	P Value				Uncorrected Dunn's test	Mean rank diff.	P Value
								W (DFn, DFd)	1.568 (3.000, 6.132)					h vs. h+S	-5	0.1375				h vs. h+S	3.5	0.2985
								P value	0.2904					h vs. h+U	0.75	0.8237				h vs. h+U	-4	0.2348
														h vs. h+S+U	0.25	0.9408				h vs. h+S+U	-5.5	0.1023
								Dunnett's T3 multiple comparisons test	Mean Diff.	95.00% CI of diff.	P Value
								h vs. h+S	-0.2562	-1.342 to 0.8300	0.5972
								h vs. h+U	-0.1272	-1.049 to 0.7944	0.9589
								h vs. h+S+U	-0.2829	-1.182 to 0.6167	0.5361

## Sheet: Figure1-1L,1M
Claudin-5/β-actin
Group	h				h+S				h+U				h+S+U					Claudin-5/β-actin						ZO-1/β-actin						Occludin/β-actin
Relative Expression	0.994504	1.01137	0.796203	1.19792	2.00993	2.58048	2.02164	2.01777	1.48848	1.62007	1.23958	1.14436	2.9401	2.74311	1.91658	2.20792		Test for normal distribution						Test for normal distribution						Test for normal distribution
Mean	1				2.15745				1.37312				2.45193					Shapiro-Wilk test	h	h+S	h+U	h+S+U		Shapiro-Wilk test	h	h+S	h+U	h+S+U		Shapiro-Wilk test	h	h+S	h+U	h+S+U
																		W	0.9619	0.6463	0.9392	0.9383		W	0.8846	0.9871	0.9339	0.8801		W	0.9266	0.9602	0.7172	0.8866
ZO-1/β-actin																		P value	0.7906	0.0023	0.6495	0.6443		P value	0.3588	0.9423	0.6178	0.3391		P value	0.5744	0.7803	0.0181	0.3677
Group	h				h+S				h+U				h+S+U
Relative Expression	0.966161	1.03957	1.02076	0.97351	1.06721	1.32067	0.957408	1.19951	0.939715	0.965238	0.808144	1.20841	1.01983	1.0781	0.946555	0.679501		Kruskal-Wallis test						Brown-Forsythe test						Kruskal-Wallis test
Mean	1				1.1362				0.980377				0.930995					P value	<0.0001					F (DFn, DFd)	0.8829 (3, 12)					P value	0.6969
																		P value summary	****					P value	0.4774					P value summary	ns
Occludin/β-actin																		Kruskal-Wallis statistic	12.57											Kruskal-Wallis statistic	1.61
Group	h				h+S				h+U				h+S+U											ONE way ANOVA test
Relative Expression	0.728653	1.07168	1.18711	1.01256	1.11147	1.47038	0.815727	1.13802	1.37483	1.09891	1.11625	1.08417	0.767779	0.817177	1.35299	1.18331		Uncorrected Dunn's test	Mean rank diff.	P Value				Uncorrected Fisher's LSD	Mean Diff.	95.00% CI of diff.	P Value			Uncorrected Dunn's test	Mean rank diff.	P Value
Mean	1				1.1339				1.16854				1.03031					h vs. h+S	-9	0.0075				h vs. h+S	-0.1362	-0.3609 to 0.08847	0.2112			h vs. h+S	-3.5	0.2985
																		h vs. h+U	-3.5	0.2985				h vs. h+U	0.01962	-0.2050 to 0.2443	0.8523			h vs. h+U	-3.75	0.2653
																		h vs. h+S+U	-10.5	0.0018				h vs. h+S+U	0.069	-0.1557 to 0.2937	0.516			h vs. h+S+U	-1.75	0.6032

[truncated: 2 more sheets: Figure1-1N,1O, Figure1-1P-1S]
