# Supplementary material for: Neurons enhance blood–brain barrier function via upregulating claudin-5 and VE-cadherin expression due to glial cell line-derived neurotrophic factor secretion
Source: eLife. 2024 Oct 30;13:RP96161. doi: 10.7554/eLife.96161 (PMC11524583; doi:10.7554/eLife.96161)
Supplement: Figure 2—source data 3. [file elife-96161-fig2-data3.xlsx]

## Sheet: Figure 2-2A
Claudin-5/β-actin																		Claudin-5/β-actin						VE-cadherin/β-actin
Group	Con				S-CM				U-CM				US-CM					Test for normal distribution						Test for normal distribution
Relative Expression	0.947386	1.10098	0.941099	1.01053	1.75649	2.09916	1.80617	1.97474	1.28411	1.21193	1.22007	1.27227	2.35369	2.20388	1.79105	1.78514		Shapiro-Wilk test	Con	S-CM	U-CM	US-CM		Shapiro-Wilk test	Con	S-CM	U-CM	US-CM
Mean	1				1.90914				1.2471				2.03344					W	0.8756	0.9347	0.856	0.8376		W	0.8325	0.9363	0.9355	0.9988
																		P value	0.3204	0.6225	0.2461	0.1885		P value	0.1743	0.6322	0.6272	0.9965
VE-cadherin/β-actin
Group	Con				S-CM				U-CM				US-CM					Brown-Forsythe test						Brown-Forsythe test
Relative Expression	0.991063	1.28426	0.856202	0.868477	1.39772	1.61264	1.20246	1.26515	1.65057	1.57672	1.79901	1.85442	1.70295	1.82948	2.0572	1.45999		F (DFn, DFd)	13.57 (3, 12)					F (DFn, DFd)	0.2940 (3, 12)
Mean	1				1.36949				1.72018				1.76241					P value	0.0004					P value	0.829
																		Welch's ANOVA test						One way ANOVA tests
																		W (DFn, DFd)	38.88 (3.000, 5.723)					Uncorrected Fisher's LSD	Mean Diff.	95.00% CI of diff.	P Value
																		P value	0.0003					Con vs. S-CM	-0.3698	-0.6693 to -0.07022	0.0197
																								Con vs. U-CM	-0.7205	-1.020 to -0.4210	0.0002
																		Dunnett's T3 multiple comparisons test	Mean Diff.	95.00% CI of diff.	P Value			Con vs. US-CM	-0.7625	-1.062 to -0.4630	0.0001
																		Con vs. S-CM	-0.909	-1.375 to -0.4429	0.0021
																		Con vs. U-CM	-0.247	-0.4684 to -0.02557	0.017
																		Con vs. US-CM	-1.034	-2.041 to -0.02583	0.0233

## Sheet: Figure 2-2B
2-△Ct*10-5										GDNF Expression					BDNF Expression					NGF Expression					IGF-1 Expression
Group	GDNF	BDNF	NGF	IGF-1	NTF4	VEGF	bFGF	TGF-β-1		Test for normal distribution					Test for normal distribution					Test for normal distribution					Test for normal distribution
h	0.138047	104.735	12.8799	30.3656	3.09082	1467.44	68.3221	164.398		Shapiro-Wilk test	hCMEC/D3	U251	SH-SY5Y		Shapiro-Wilk test	hCMEC/D3	U251	SH-SY5Y		Shapiro-Wilk test	hCMEC/D3	U251	SH-SY5Y		Shapiro-Wilk test	hCMEC/D3	U251	SH-SY5Y
	0.213446	103.364	12.9733	29.0876	2.46408	1531.77	56.9272	154.856		W	0.9667	0.9315	0.9903		W	0.7201	0.8976	0.9977		W	0.9382	0.8051	0.9619		W	0.9517	0.9321	0.9284
	0.178348	139.607	15.5822	32.7039	2.75523	1594.43	74.1135	219.056		P value	0.8207	0.6035	0.9589		P value	0.0194	0.4193	0.9927		P value	0.6433	0.1117	0.791		P value	0.7269	0.6071	0.585
	0.154014	100.447	9.21248	33.8305	3.03808	1842.22	74.8463	216.814
h+S	1.46443	92.3349	19.3619	47.3676	0.805722	2910.58	74.8304	303.193		Brown-Forsythe test					Kruskal-Wallis test					Brown-Forsythe test					Brown-Forsythe test
	1.36277	96.2291	18.0085	48.0758	0.83816	2459.67	67.8184	264.948		F (DFn, DFd)	5.657 (2, 9)				P value	0.0215				F (DFn, DFd)	0.1200 (2, 9)				F (DFn, DFd)	2.957 (2, 9)
	1.50792	110.325	23.0965	49.8191	1.03125	2833.87	84.4237	336.371		P value	0.0256				P value summary	*				P value	0.8883				P value	0.103
	1.38728	107.537	17.964	43.499	0.346294	2560.55	125.793	329.607							Kruskal-Wallis statistic	6.731
h+U	24.2878	71.2801	22.0444	319.136	5.57598	390.444	245.501	712.668		Welch's ANOVA test										One way ANOVA tests					Welch's ANOVA test
	30.3407	95.1492	27.0262	310.341	9.68192	445.988	325.377	863.696		W (DFn, DFd)	529.8 (2.000, 4.729)				Uncorrected Dunn's test	Mean rank diff.	P Value			Uncorrected Fisher's LSD	Mean Diff.	95.00% CI of diff.	P Value		W (DFn, DFd)	110.5 (2.000, 5.263)
	17.3434	79.6354	22.5668	348.122	5.85297	500.709	297.871	795.303		P value	<0.0001				hCMEC/D3 vs. U251	1.25	0.6239			hCMEC/D3 vs. U251	-6.946	-11.52 to -2.373	0.0074		P value	<0.0001
	22.0852	86.6188	18.6494	248.778	2.21054	485.11	264.202	836.88		P value summary	****				hCMEC/D3 vs. SH-SY5Y	6.25	0.0142			hCMEC/D3 vs. SH-SY5Y	-9.91	-14.48 to -5.336	0.0008
															U251 vs. SH-SY5Y	5	0.0499			U251 vs. SH-SY5Y	-2.964	-7.537 to 1.610	0.1767		Dunnett's T3 multiple comparisons test	Mean Diff.	95.00% CI of diff.	P Value
										Dunnett's T3 multiple comparisons test	Mean Diff.	95.00% CI of diff.	P Value												hCMEC/D3 vs. U251	-15.69	-22.17 to -9.217	0.0003
										hCMEC/D3 vs. U251	-1.26	-1.432 to -1.087	<0.0001												hCMEC/D3 vs. SH-SY5Y	-275.1	-394.8 to -155.4	0.0023
										hCMEC/D3 vs. SH-SY5Y	-23.34	-38.78 to -7.904	0.0077												U251 vs. SH-SY5Y	-259.4	-379.2 to -139.6	0.0027
										U251 vs. SH-SY5Y	-22.08	-37.52 to -6.643	0.0091
										VEGF Expression					bFGF Expression					TGF-β Expression
										Test for normal distribution					Test for normal distribution					Test for normal distribution
										Shapiro-Wilk test	hCMEC/D3	U251	SH-SY5Y		Shapiro-Wilk test	hCMEC/D3	U251	SH-SY5Y		Shapiro-Wilk test	hCMEC/D3	U251	SH-SY5Y
										W	0.891	0.9074	0.9348		W	0.857	0.8494	0.9692		W	0.8098	0.9088	0.9394
										P value	0.3878	0.469	0.6232		P value	0.2497	0.2243	0.8363		P value	0.121	0.4759	0.6506
										Brown-Forsythe test					Brown-Forsythe test					Brown-Forsythe test
										F (DFn, DFd)	3.615 (2, 9)				F (DFn, DFd)	2.466 (2, 9)				F (DFn, DFd)	1.009 (2, 9)
										P value	0.0704				P value	0.14				P value	0.4024
										One way ANOVA tests					One way ANOVA tests					One way ANOVA tests
										Uncorrected Fisher's LSD	Mean Diff.	95.00% CI of diff.	P Value		Uncorrected Fisher's LSD	Mean Diff.	95.00% CI of diff.	P Value		Uncorrected Fisher's LSD	Mean Diff.	95.00% CI of diff.	P Value
										hCMEC/D3 vs. U251	-1082	-1336 to -828.2	<0.0001		hCMEC/D3 vs. U251	-19.66	-60.98 to 21.65	0.3096		hCMEC/D3 vs. U251	-119.7	-194.5 to -45.02	0.0055
										hCMEC/D3 vs. SH-SY5Y	1153	899.4 to 1407	<0.0001		hCMEC/D3 vs. SH-SY5Y	-214.7	-256.0 to -173.4	<0.0001		hCMEC/D3 vs. SH-SY5Y	-613.4	-688.1 to -538.6	<0.0001
										U251 vs. SH-SY5Y	2236	1982 to 2490	<0.0001		U251 vs. SH-SY5Y	-195	-236.3 to -153.7	<0.0001		U251 vs. SH-SY5Y	-493.6	-568.3 to -418.9	<0.0001

## Sheet: Figure 2-2C
	Conc.(pg/ml)					GDNF						bFGF						IGF-1						TGF-β
Group	GDNF	bFGF	IGF-1	TGF-β		Test for normal distribution						Test for normal distribution						Test for normal distribution						Test for normal distribution
h-CM	6.35354	739.139	461.036	63.7763		Shapiro-Wilk test	h-CM	S-CM	U-CM	US-CM		Shapiro-Wilk test	h-CM	S-CM	U-CM	US-CM		Shapiro-Wilk test	h-CM	S-CM	U-CM	US-CM		Shapiro-Wilk test	h-CM	S-CM	U-CM	US-CM
	5.54545	729.089	623.526	74.0179		W	0.9	0.957	0.9739	0.9272		W	0.9783	0.8066	0.9773	0.9376		W	0.9079	0.9805	0.8461	0.9436		W	0.7818	0.8471	0.9867	0.8341
	6.23232	732.003	603.195	65.8177		P value	0.4313	0.7599	0.8652	0.5781		P value	0.8917	0.1147	0.886	0.6397		P value	0.4711	0.9048	0.2139	0.6767		P value	0.0734	0.217	0.9402	0.1789
	4.67677	736.077	556.82	63.5251
S-CM	15.2626	5015.26	5866.45	34.5941		Brown-Forsythe test						Brown-Forsythe test						Brown-Forsythe test						Brown-Forsythe test
	14.6566	5173.45	5972.82	45.1185		F (DFn, DFd)	0.7101 (3, 12)					F (DFn, DFd)	5.481 (3, 12)					F (DFn, DFd)	0.3536 (3, 12)					F (DFn, DFd)	1.479 (3, 12)
	13.4242	5158.85	5935.31	46.1271		P value	0.5644					P value	0.0132					P value	0.7874					P value	0.2698
	11.9697	5198.3	5894.63	36.5971
U-CM	11.8485	1274.99	294.795	53.4825		One way ANOVA tests						Welch's ANOVA test						One way ANOVA tests						One way ANOVA tests
	9.76768	1289.07	383.034	54.8727		Uncorrected Fisher's LSD	Mean Diff.	95.00% CI of diff.	P Value			W (DFn, DFd)	6824 (3.000, 5.581)					Uncorrected Fisher's LSD	Mean Diff.	95.00% CI of diff.	P Value			Uncorrected Fisher's LSD	Mean Diff.	95.00% CI of diff.	P Value
	10.6162	1280.67	383.034	55.2744		h-CM vs. S-CM	-8.125	-9.851 to -6.399	<0.0001			P value	<0.0001					h-CM vs. S-CM	-5356	-5439 to -5273	<0.0001			h-CM vs. S-CM	26.18	19.12 to 33.23	<0.0001
	9.14141	1295.68	348.412	56.4408		h-CM vs. U-CM	-4.643	-6.368 to -2.917	<0.0001			P value summary	****					h-CM vs. U-CM	208.8	126.0 to 291.6	0.0001			h-CM vs. U-CM	11.77	4.710 to 18.82	0.0034
US-CM	16.7374	6123.97	1258.5	97.298		h-CM vs. US-CM	-11.13	-12.85 to -9.402	<0.0001									h-CM vs. US-CM	-761	-843.8 to -678.2	<0.0001			h-CM vs. US-CM	-23.46	-30.52 to -16.41	<0.0001
	18.1717	6354.07	1351.84	87.3923		S-CM vs. U-CM	3.483	1.757 to 5.208	0.0009			Dunnett's T3 multiple comparisons test	Mean Diff.	95.00% CI of diff.	P Value			S-CM vs. U-CM	5565	5482 to 5648	<0.0001			S-CM vs. U-CM	-14.41	-21.47 to -7.352	0.0008
	15.8687	6534.41	1309.6	89.6728		S-CM vs. US-CM	-3.003	-4.728 to -1.277	0.0026			h-CM vs. S-CM	-4402	-4680 to -4125	<0.0001			S-CM vs. US-CM	4595	4512 to 4678	<0.0001			S-CM vs. US-CM	-49.64	-56.70 to -42.58	<0.0001
	16.5354	6602.16	1368.65	86.6306		U-CM vs. US-CM	-6.485	-8.211 to -4.759	<0.0001			h-CM vs. U-CM	-551	-578.1 to -523.9	<0.0001			U-CM vs. US-CM	-969.8	-1053 to -887.0	<0.0001			U-CM vs. US-CM	-35.23	-42.29 to -28.17	<0.0001
												h-CM vs. US-CM	-5670	-6389 to -4950	<0.0001
												S-CM vs. U-CM	3851	3572 to 4130	<0.0001
												S-CM vs. US-CM	-1267	-1880 to -654.2	0.0017
												U-CM vs. US-CM	-5119	-5839 to -4398	<0.0001

## Sheet: Figure 2-2D
Claudin-5/β-actin																		Claudin-5/β-actin
Group	Con				50pg				100pg				200pg					Test for normal distribution
Relative Expression	0.959	1.054	0.828	1.159	1.162	1.622	1.551	1.402	1.449	1.855	1.384	1.893	2.027	2.014	1.765	2.333		Shapiro-Wilk test	Con	50 pg	100 pg	200 pg
Mean	1				1.43425				1.64525				2.03475					W	0.9954	0.937	0.8211	0.9499
																		P value	0.9832	0.6363	0.1457	0.7154
VE-cadherin/β-actin
Group	Con				50pg				100pg				200pg					Brown-Forsythe test
Relative Expression	0.927	1.065	0.796	1.212	1.462	1.352	1.497	1.494	1.733	1.56	1.556	1.562	1.847	2.268	1.408	1.657		F (DFn, DFd)	0.9351 (3, 12)
Mean	1				1.45125				1.60275				1.795					P value	0.4539
																		One way ANOVA tests
																		Uncorrected Fisher's LSD	Mean Diff.	95.00% CI of diff.	P Value
																		Con vs. 50pg	-0.4343	-0.7664 to -0.1021	0.0147
																		Con vs. 100pg	-0.6453	-0.9774 to -0.3131	0.0012
																		Con vs. 200pg	-1.035	-1.367 to -0.7026	<0.0001
																		VE-cadherin/β-actin
																		Test for normal distribution
																		Shapiro-Wilk test	Con	50 pg	100 pg	200 pg
																		W	0.9925	0.7936	0.6572	0.9809
																		P value	0.9699	0.0912	0.0033	0.9072
																		Kruskal-Wallis test
																		P value	0.0011
																		P value summary	**
																		Kruskal-Wallis statistic	11.32
																		Uncorrected Dunn's test	Mean rank diff.	P Value
																		Con vs. 50	-4.75	0.1583
																		Con vs. 100	-9.25	0.006
																		Con vs. 200	-10	0.003

## Sheet: Figure 2-2E
Claudin-5/β-actin																		Claudin-5/β-actin
Group	Con				10ng				30ng				60ng					Test for normal distribution
Relative Expression	1.25059	1.01245	0.820825	0.916142	0.939462	0.937423	0.94701	1.02598	0.948854	0.911617	1.37619	1.28669	0.898202	0.686721	1.05508	1.22183		Shapiro-Wilk test	Con	10 ng	30 ng	60 ng
Mean	1				0.962469				1.13084				0.965456					W	0.9498	0.7107	0.851	0.9945
																		P value	0.7147	0.0154	0.2295	0.9793
VE-cadherin/β-actin
Group	Con				10ng				30ng				60ng					Kruskal-Wallis test
Relative Expression	1.06991	0.896994	1.07767	0.955429	0.961355	1.09854	0.864416	0.888163	1.17707	1.19888	0.892111	0.799857	0.958527	1.13666	0.83449	0.873949		P value	0.7113
Mean	1				0.953118				1.01698				0.950906					P value summary	ns
																		Kruskal-Wallis statistic	1.522
																		Uncorrected Dunn's test	Mean rank diff.	P Value
																		Con vs. 10 ng	-0.25	0.9408
																		Con vs. 30 ng	-3.25	0.3343
																		Con vs. 60 ng	0.5	0.8819
																		VE-cadherin/β-actin
																		Test for normal distribution
																		Shapiro-Wilk test	Con	10 ng	30 ng	60 ng
																		W	0.8721	0.8995	0.8518	0.9099
																		P value	0.3062	0.4287	0.232	0.4818
																		Brown-Forsythe test
																		F (DFn, DFd)	2.321 (3, 12)
																		P value	0.127
																		One way ANOVA tests
																		Uncorrected Fisher's LSD	Mean Diff.	95.00% CI of diff.	P Value
																		Con vs. 10ng	0.047	-0.1676 to 0.2616	0.6418
																		Con vs. 30ng	-0.017	-0.2316 to 0.1976	0.8659
																		Con vs. 60ng	0.049	-0.1656 to 0.2636	0.6279

## Sheet: Figure 2-2F
Claudin-5/β-actin																		Claudin-5/β-actin
Group	Con				10ng				30ng				60ng					Test for normal distribution
Relative Expression	0.856841	0.976996	0.884814	1.28135	0.914809	0.805645	1.2152	1.25206	0.820022	0.829765	1.18488	1.09478	1.00373	0.780796	1.20961	1.18294		Shapiro-Wilk test	Con	10 ng	30 ng	60 ng
Mean	1				1.04693				0.982361				1.04427					W	0.8312	0.8714	0.8416	0.8953
																		P value	0.171	0.3032	0.2	0.408
VE-cadherin/β-actin
Group	Con				10ng				30ng				60ng					Brown-Forsythe test
Relative Expression	1.08438	1.27394	0.812722	0.828951	1.20789	0.882817	0.938347	0.937057	0.924432	0.948862	0.808438	0.821441	0.783933	0.696635	0.936912	0.873489		F (DFn, DFd)	0.2352 (3, 12)
Mean	1				0.991527				0.875793				0.822742					P value	0.8701
																		One way ANOVA tests
																		Uncorrected Fisher's LSD	Mean Diff.	95.00% CI of diff.	P Value
																		Con vs. 10ng	-0.04693	-0.3552 to 0.2613	0.7458
																		Con vs. 30ng	0.01764	-0.2906 to 0.3259	0.9028
																		Con vs. 60ng	-0.04427	-0.3525 to 0.2640	0.7597
																		VE-cadherin/β-actin
																		Test for normal distribution
																		Shapiro-Wilk test	Con	10 ng	30 ng	60 ng
																		W	0.8821	0.7762	0.8498	0.9816
																		P value	0.3475	0.066	0.2257	0.9112
																		Brown-Forsythe test
																		F (DFn, DFd)	1.648 (3, 12)
																		P value	0.2307
																		One way ANOVA tests
																		Uncorrected Fisher's LSD	Mean Diff.	95.00% CI of diff.	P Value
																		Con vs. 10ng	0.0085	-0.2178 to 0.2348	0.9361
																		Con vs. 30ng	0.1245	-0.1018 to 0.3508	0.2539
																		Con vs. 60ng	0.1773	-0.04909 to 0.4036	0.1137

## Sheet: Figure 2-2G
Claudin-5/β-actin																		Claudin-5/β-actin
Group	Con				0.5 ng				2 ng				5 ng					Test for normal distribution
Relative Expression	0.980725	0.876917	1.1058	1.03656	0.910166	1.01678	1.00301	0.937012	0.947422	0.869868	1.01919	1.0904	0.652597	0.617541	0.958743	0.633557		Shapiro-Wilk test	Con	0.5 ng	2 ng	5 ng
Mean	1				0.966743				0.98172				0.715609					W	0.9891	0.8991	0.9935	0.711
																		P value	0.9528	0.4264	0.9745	0.0155
VE-cadherin/β-actin
Group	Con				0.5 ng				2 ng				5 ng					Kruskal-Wallis test
Relative Expression	0.996424	1.12631	0.837945	1.03932	1.05968	0.953425	1.00494	1.14734	0.979022	0.849118	1.08694	1.12545	0.847245	0.832204	0.952469	0.704967		P value	0.1187
Mean	1				1.04135				1.01013				0.834221					P value summary	ns
																		Kruskal-Wallis statistic	5.757
																		Uncorrected Dunn's test	Mean rank diff.	P Value
																		Con vs. 0.5 ng	2.25	0.5039
																		Con vs. 2 ng	1.25	0.7104
																		Con vs. 5 ng	7.5	0.0259
																		VE-cadherin/β-actin
																		Test for normal distribution
																		Shapiro-Wilk test	Con	0.5 ng	2 ng	5 ng
																		W	0.9634	0.9837	0.9366	0.9652
																		P value	0.8004	0.9232	0.6338	0.8119
																		Brown-Forsythe test
																		F (DFn, DFd)	0.2480 (3, 12)
																		P value	0.8612
																		One way ANOVA tests
																		Uncorrected Fisher's LSD	Mean Diff.	95.00% CI of diff.	P Value
																		Con vs. 0.5 ng	-0.0415	-0.2085 to 0.1255	0.5982
																		Con vs. 2 ng	-0.01025	-0.1773 to 0.1568	0.8959
																		Con vs. 5 ng	0.1658	-0.001293 to 0.3328	0.0515

## Sheet: Figure 2-2H
Claudin-5/β-actin																		Claudin-5/β-actin
Group	Con				US-CM				US-CM+0.5 Anti				US-CM+1.0 Anti					Test for normal distribution
Relative Expression	0.721848	0.618045	1.19214	1.46796	1.28551	1.25123	1.88904	1.93042	0.829733	0.790185	1.44901	1.19549	0.738473	0.89476	1.0526	0.645796		Shapiro-Wilk test	Con	US- CM	US- CM+0.5 Anti	US- CM+1.0 Anti
Mean	1				1.58905				1.0661				0.832907					W	0.9157	0.7796	0.8936	0.9719
																		P value	0.5132	0.0703	0.4002	0.8532
VE-cadherin/β-actin
Group	Con				US-CM				US-CM+0.5 Anti				US-CM+1.0 Anti					Brown-Forsythe test
Relative Expression	0.894514	0.984348	1.05339	1.06774	1.34378	1.62269	1.16709	1.54843	1.22157	1.37074	1.29927	1.01802	1.05604	1.06263	0.735446	0.83831		F (DFn, DFd)	3.171 (3, 12)
Mean	1				1.4205				1.2274				0.923109					P value	0.0637
																		One way ANOVA tests
																		Uncorrected Fisher's LSD	Mean Diff.	95.00% CI of diff.	P Value
																		Con vs.US- CM	-0.589	-1.093 to -0.08526	0.0256
																		US- CM vs. US- CM+0.5 Anti	0.523	0.01926 to 1.027	0.043
																		US-CM vs. US- CM+1.0 Anti	0.756	0.2523 to 1.260	0.0067
																		VE-cadherin/β-actin
																		Test for normal distribution
																		Shapiro-Wilk test	Con	US- CM	US- CM+0.5 Anti	US- CM+1.0 Anti
																		W	0.9083	0.9471	0.937	0.8575
																		P value	0.4733	0.6979	0.6358	0.2514
																		Brown-Forsythe test
																		F (DFn, DFd)	1.542 (3, 12)
																		P value	0.2545
																		One way ANOVA tests
																		Uncorrected Fisher's LSD	Mean Diff.	95.00% CI of diff.	P Value
																		Con vs.US- CM	-0.4205	-0.6623 to -0.1787	0.0026
																		US- CM vs. US- CM+0.5 Anti	0.193	-0.04880 to 0.4348	0.1076
																		US-CM vs. US- CM+1.0 Anti	0.4975	0.2557 to 0.7393	0.0007

## Sheet: Figure 2-2I
Claudin-5/β-actin																						Claudin-5/β-actin
Group	Con				GDNF				GDNF+0.25 Anti				GDNF+0.5 Anti				GDNF+1.0 Anti					Test for normal distribution
Relative Expression	0.725141	1.08229	0.968694	1.22387	1.74834	1.50864	1.59449	1.22934	1.30784	1.4828	1.16582	1.19232	1.64115	1.17145	0.970557	0.910382	0.958245	0.959457	0.885815	0.824193		Shapiro-Wilk test	Con	GDNF	GDNF+0.25 Anti	GDNF+0.5 Anti	GDNF+1.0 Anti
Mean	1				1.5202				1.28719				1.17338				0.906927					W	0.9803	0.9666	0.8996	0.8721	0.8686
																						P value	0.9038	0.8205	0.4289	0.3061	0.2921
VE-cadherin/β-actin
Group	Con				US-CM				US-CM+0.5 Anti				US-CM+1.0 Anti				GDNF+1.0 Anti					Brown-Forsythe test
Relative Expression	0.784929	0.887887	1.23119	1.09599	1.28905	1.20436	1.63255	1.51085	0.888391	0.691536	0.872295	0.814251	0.565521	0.6681	0.882503	0.731443	0.688109	0.840507	0.912421	1.12694		F (DFn, DFd)	0.9624 (4, 15)
Mean	1				1.4092				0.816618				0.711892				0.891995					P value	0.4564
																						One way ANOVA tests
																						Uncorrected Fisher's LSD	Mean Diff.	95.00% CI of diff.	P Value
																						Con vs. GDNF	-0.52	-0.8409 to -0.1991	0.0035
																						GDNF vs. GDNF+0.25 Anti	0.2328	-0.08813 to 0.5536	0.1429
																						GDNF vs. GDNF+0.5 Anti	0.3468	0.02587 to 0.6676	0.036
																						GDNF vs. GDNF+1.0 Anti	0.6133	0.2924 to 0.9341	0.001
																						VE-cadherin/β-actin
																						Test for normal distribution
																						Shapiro-Wilk test	Con	GDNF	GDNF+0.25 Anti	GDNF+0.5 Anti	GDNF+1.0 Anti
																						W	0.9589	0.9407	0.8792	0.9865	0.9845
																						P value	0.7721	0.6586	0.3354	0.9389	0.9278
																						Brown-Forsythe test
																						F (DFn, DFd)	1.266 (4, 15)
																						P value	0.3265
																						One way ANOVA tests
																						Uncorrected Fisher's LSD	Mean Diff.	95.00% CI of diff.	P Value
																						Con vs. GDNF	-0.4093	-0.6599 to -0.1586	0.0034
																						GDNF vs. GDNF+0.25 Anti	0.5928	0.3421 to 0.8434	0.0001
																						GDNF vs. GDNF+0.5 Anti	0.6973	0.4466 to 0.9479	<0.0001
																						GDNF vs. GDNF+1.0 Anti	0.5173	0.2666 to 0.7679	0.0005

## Sheet: Figure 2-2J
Claudin-5/β-actin														Claudin-5/β-actin
Group	Con				US-CM				GDNF					Test for normal distribution
Relative Expression	1.29626	1.07594	0.753781	0.874023	1.30189	1.40538	1.33728	1.55506	1.49491	1.31742	1.47899	1.58615		Shapiro-Wilk test	Con	CM	GDNF
Mean	1				1.3999				1.46937					W	0.9713	0.9115	0.9361
														P value	0.8497	0.4906	0.6309
VE-cadherin/β-actin
Group	Con				US-CM				GDNF					Brown-Forsythe test
Relative Expression	0.732729	1.10626	0.931785	1.22922	1.84476	1.80236	1.80874	1.6614	1.57552	2.09494	1.6916	1.731		F (DFn, DFd)	2.169 (2, 9)
Mean	1				1.77932				1.77327					P value	0.1703
														One way ANOVA tests
														Uncorrected Fisher's LSD	Mean Diff.	95.00% CI of diff.	P Value
														Con vs. US-CM	-0.3998	-0.6637 to -0.1358	0.0075
														Con vs. GDNF	-0.4693	-0.7332 to -0.2053	0.003
														VE-cadherin/β-actin
														Test for normal distribution
														Shapiro-Wilk test	Con	CM	GDNF
														W	0.9798	0.8264	0.8746
														P value	0.9009	0.1586	0.3159
														Brown-Forsythe test
														F (DFn, DFd)	1.082 (2, 9)
														P value	0.3791
														One way ANOVA tests
														Uncorrected Fisher's LSD	Mean Diff.	95.00% CI of diff.	P Value
														Con vs. US-CM	-0.7793	-1.076 to -0.4823	0.0002
														Con vs. GDNF	-0.7735	-1.070 to -0.4766	0.0002

[truncated: 10 more sheets: Figure 2-2K, Figure 2-2L, Figure 2-2M, Figure 2-2N, Figure 2-2O, Figure 2-2P, Figure 2-2Q, Figure 2-2R, Figure 2-2S, Figure 2-2T]
