# Supplementary material for: Neurons enhance blood–brain barrier function via upregulating claudin-5 and VE-cadherin expression due to glial cell line-derived neurotrophic factor secretion
Source: eLife. 2024 Oct 30;13:RP96161. doi: 10.7554/eLife.96161 (PMC11524583; doi:10.7554/eLife.96161)
Supplement: Figure 3—source data 3. [file elife-96161-fig3-data3.xlsx]

## Sheet: Figure 3-3A
Claudin-5/β-actin																		Claudin-5/β-actin						VE-cadherin/β-actin
Group	Con				GDNF				GDNF+SPP				GDNF+LY					Test for normal distribution						Test for normal distribution
Relative Expression	0.893094	1.23029	0.858951	1.01766	1.76109	1.65656	1.69229	2.04589	0.918026	0.68671	1.2828	1.07094	0.330067	0.342626	0.13677	0.66762		Shapiro-Wilk test	Con	GDNF	GDNF+SPP	GDNF+LY		Shapiro-Wilk test	Con	GDNF	GDNF+SPP	GDNF+LY
Mean	1				1.78896				0.98962				0.369271					W	0.8994	0.83	0.9993	0.9267		W	0.9801	0.9607	0.7766	0.9858
																		P value	0.4281	0.1678	0.9981	0.5752		P value	0.9025	0.7836	0.0665	0.9351
VE-cadherin/β-actin
Group	Con				GDNF				GDNF+SPP				GDNF+LY					Brown-Forsythe test						Brown-Forsythe test
Relative Expression	1.03862	1.01321	0.964315	0.983858	1.43695	1.55373	1.42432	1.28294	0.962551	0.781813	0.79257	0.816567	0.76708	0.843843	0.933217	0.885157		F (DFn, DFd)	0.2371 (3, 12)					F (DFn, DFd)	0.4409 (3, 12)
Mean	1				1.42449				0.838375				0.857324					P value	0.8688					P value	0.728
p-AKT/AKT																		One way ANOVA tests						One way ANOVA tests
Group	Con				GDNF				GDNF+SPP				GDNF+LY					Uncorrected Fisher's LSD	Mean Diff.	95.00% CI of diff.	P Value			Uncorrected Fisher's LSD	Mean Diff.	95.00% CI of diff.	P Value
Relative Expression	0.972612	1.0278	0.834425	1.16516	1.31142	1.23987	1.37983	1.4488	0.518634	0.554207	0.549196	0.523922	1.04375	1.14247	1.00088	0.825817		Con vs. GDNF	-0.789	-1.108 to -0.4704	0.0002			Con vs. GDNF	-0.4245	-0.5473 to -0.3017	<0.0001
Mean	1				1.34498				0.53649				1.00323					GDNF vs. GDNF+SPP	0.7993	0.4807 to 1.118	0.0001			GDNF vs. GDNF+SPP	0.5858	0.4629 to 0.7086	<0.0001
																		GDNF vs. GDNF+LY	1.42	1.101 to 1.738	<0.0001			GDNF vs. GDNF+LY	0.5673	0.4444 to 0.6901	<0.0001
																		p-AKT/AKT
																		Test for normal distribution
																		Shapiro-Wilk test	Con	GDNF	GDNF+SPP	GDNF+LY
																		W	0.9948	0.9937	0.8622	0.962
																		P value	0.9806	0.9756	0.2682	0.7915
																		Brown-Forsythe test
																		F (DFn, DFd)	1.431 (3, 12)
																		P value	0.2823
																		One way ANOVA tests
																		Uncorrected Fisher's LSD	Mean Diff.	95.00% CI of diff.	P Value
																		Con vs. GDNF	-0.345	-0.5077 to -0.1823	0.0006
																		GDNF vs. GDNF+SPP	0.8085	0.6458 to 0.9712	<0.0001
																		GDNF vs. GDNF+LY	0.3418	0.1790 to 0.5045	0.0006

## Sheet: Figure 3-3B
Claudin-5/β-actin																		Claudin-5/β-actin						VE-cadherin/Tubulin
Group	Con				GDNF				GDNF+SPP				GDNF+U0					Test for normal distribution						Test for normal distribution
Relative Expression	1.08589	1.29806	0.695196	0.920857	1.59385	2.1456	1.49499	1.91714	1.33237	1.1741	1.63031	1.17743	1.23798	1.18235	0.711569	1.01087		Shapiro-Wilk test	Con	GDNF	GDNF+SPP	GDNF+U0		Shapiro-Wilk test	Con	GDNF	GDNF+SPP	GDNF+U0
Mean	1				1.7879				1.32855				1.03569					W	0.9989	0.9361	0.8352	0.9066		W	0.8532	0.9456	0.8965	0.9317
																		P value	0.9967	0.6305	0.1818	0.4646		P value	0.2368	0.6888	0.4139	0.6044
VE-cadherin/Tubulin
Group	Con				GDNF				GDNF+SPP				GDNF+U0					Brown-Forsythe test						Brown-Forsythe test
Relative Expression	0.714949	0.773525	1.30747	1.20406	1.41518	1.82304	2.24609	2.11037	1.09177	1.00827	0.525018	0.298373	0.785525	0.660745	0.696043	0.631576		F (DFn, DFd)	0.3419 (3, 12)					F (DFn, DFd)	4.492 (3, 12)
Mean	1				1.89867				0.730858				0.693472					P value	0.7955					P value	0.0247
p-ERK/ERK																		One way ANOVA tests						One way ANOVA tests
Group	Con				GDNF				GDNF+SPP				GDNF+U0					Uncorrected Fisher's LSD	Mean Diff.	95.00% CI of diff.	P Value			Dunnett's T3 multiple comparisons test	Mean Diff.	95.00% CI of diff.	P Value
Relative Expression	0.985236	1.02541	0.994879	0.994474	1.51218	1.333	1.31015	1.35128	1.11344	1.11396	1.17486	1.20161	0.895646	0.804344	0.867295	1.02624		Con vs. GDNF	-0.788	-1.178 to -0.3979	0.0009			Con vs. GDNF	-0.8987	-1.916 to 0.1185	0.0432
Mean	1				1.37665				1.15097				0.89838					GDNF vs. GDNF+SPP	0.4598	0.06968 to 0.8498	0.0246			GDNF vs. GDNF+SPP	1.168	0.03102 to 2.305	0.0221
																		GDNF vs. GDNF+U0	0.7523	0.3622 to 1.142	0.0012			GDNF vs. GDNF+U0	1.205	-0.05156 to 2.462	0.0281
																		p-ERK/ERK
																		Test for normal distribution
																		Shapiro-Wilk test	Con	GDNF	GDNF+SPP	GDNF+U0
																		W	0.8323	0.7945	0.846	0.9447
																		P value	0.1738	0.0927	0.2134	0.6831
																		Brown-Forsythe ANOVA test
																		F* (DFn, DFd)	35.55 (3.000, 7.494)
																		P value	<0.0001
																		Welch's ANOVA test
																		W (DFn, DFd)	28.58 (3.000, 5.593)
																		P value	0.0008
																		P value summary	***
																		Dunnett's T3 multiple comparisons test	Mean Diff.	95.00% CI of diff.	P Value
																		Con vs. GDNF	-0.3767	-0.6915 to -0.06179	0.015
																		GDNF vs. GDNF +SPP	0.2257	-0.04733 to 0.4987	0.0479
																		GDNF vs. GDNF +U0	0.4783	0.1971 to 0.7595	0.0017

## Sheet: Figure 3-3C
Claudin-5/β-actin																		Claudin-5/β-actin						VE-cadherin/β-actin
Group	Con				GDNF				GDNF+SPP				GDNF+SP					Test for normal distribution						Test for normal distribution
Relative Expression	0.905067	0.794606	0.914778	1.38555	2.22294	2.34476	2.87364	1.85732	1.20191	1.4328	1.19531	1.85712	2.55934	2.72244	2.53516	2.2194		Shapiro-Wilk test	Con	GDNF	GDNF+SPP	GDNF+SP		Shapiro-Wilk test	Con	GDNF	GDNF+SPP	GDNF+SP
Mean	1				2.32467				1.42178				2.50909					W	0.8025	0.9738	0.8415	0.9219		W	0.8894	0.9313	0.9638	0.942
																		P value	0.1067	0.8648	0.1999	0.5474		P value	0.3802	0.6022	0.8027	0.6665
VE-cadherin/β-actin
Group	Con				GDNF				GDNF+SPP				GDNF+SP					Brown-Forsythe test						Brown-Forsythe test
Relative Expression	1.08493	0.863892	1.15043	0.900746	1.88679	1.65553	1.56759	1.98947	1.22411	1.07814	0.909288	0.581559	1.54133	1.38522	1.74113	1.53559		F (DFn, DFd)	0.4196 (3, 12)					F (DFn, DFd)	1.017 (3, 12)
Mean	1				1.77485				0.948276				1.55082					P value	0.7423					P value	0.4192
p-JNK/JNK																		One way ANOVA tests						One way ANOVA tests
Group	Con				GDNF				GDNF+SPP				GDNF+SP					Uncorrected Fisher's LSD	Mean Diff.	95.00% CI of diff.	P Value			Uncorrected Fisher's LSD	Mean Diff.	95.00% CI of diff.	P Value
Relative Expression	0.687157	0.968592	1.13888	1.20537	1.03627	1.12179	1.2189	1.31078	1.09081	1.00265	1.23184	1.29838	1.00026	1.06515	1.31583	1.06458		Con vs. GDNF	-1.325	-1.804 to -0.8454	<0.0001			Con vs. GDNF	-0.775	-1.079 to -0.4714	0.0001
Mean	1				1.17194				1.15592				1.11146					GDNF vs. GDNF+SPP	0.903	0.4239 to 1.382	0.0015			GDNF vs. GDNF+SPP	0.8268	0.5232 to 1.130	<0.0001
																		GDNF vs. GDNF+SP	-0.184	-0.6631 to 0.2951	0.4191			GDNF vs. GDNF+SP	0.2243	-0.07932 to 0.5278	0.1335
																		p-JNK/JNK
																		Test for normal distribution
																		Shapiro-Wilk test	Con	GDNF	GDNF+SPP	GDNF+SP
																		W	0.9214	0.9895	0.955	0.8052
																		P value	0.5446	0.9549	0.7476	0.1118
																		Brown-Forsythe test
																		F (DFn, DFd)	0.7351 (3, 12)
																		P value	0.5509
																		One way ANOVA tests
																		Uncorrected Fisher's LSD	Mean Diff.	95.00% CI of diff.	P Value
																		Con vs. GDNF	-0.172	-0.4216 to 0.07760	0.1591
																		GDNF vs. GDNF+SPP	0.016	-0.2336 to 0.2656	0.8912
																		GDNF vs. GDNF+SP	0.0605	-0.1891 to 0.3101	0.607

## Sheet: Figure 3-3D
Claudin-5/β-actin																		Claudin-5/β-actin						VE-cadherin/Tubulin
Group	Con				GDNF				GDNF+SPP				GDNF+SB					Test for normal distribution						Test for normal distribution
Relative Expression	0.979605	1.17126	0.884239	0.964896	1.64945	1.45623	1.17388	1.405	0.915384	1.07252	0.958082	1.27744	1.43656	0.959607	1.50144	1.28468		Shapiro-Wilk test	Con	GDNF	GDNF+SPP	GDNF+SB		Shapiro-Wilk test	Con	GDNF	GDNF+SPP	GDNF+SB
Mean	1				1.42114				1.05586				1.29557					W	0.9001	0.98	0.9131	0.9014		W	0.9525	0.766	0.9362	0.9577
																		P value	0.4318	0.9018	0.4988	0.4383		P value	0.7316	0.0539	0.6312	0.7643
VE-cadherin/Tubulin
Group	Con				GDNF				GDNF+SPP				GDNF+SB					Brown-Forsythe test						Brown-Forsythe test
Relative Expression	0.664034	0.876709	1.29002	1.16924	1.34288	1.35044	1.78726	1.42974	0.587586	0.795724	0.738277	1.11522	1.51018	1.70386	1.67345	1.79984		F (DFn, DFd)	0.4560 (3, 12)					F (DFn, DFd)	0.8580 (3, 12)
Mean	1				1.47758				0.809202				1.67183					P value	0.718					P value	0.4891
p-p38/p38																		One way ANOVA tests						One way ANOVA tests
Group	Con				GDNF				GDNF+SPP				GDNF+SB					Uncorrected Fisher's LSD	Mean Diff.	95.00% CI of diff.	P Value			Uncorrected Fisher's LSD	Mean Diff.	95.00% CI of diff.	P Value
Relative Expression	0.885033	0.803137	1.38282	0.929009	0.949183	0.886055	0.91347	0.945941	0.927341	0.956893	0.981229	1.02638	0.775727	0.753454	0.924065	0.936015		Con vs. GDNF	-0.421	-0.7066 to -0.1354	0.0075			Con vs. GDNF	-0.4775	-0.8116 to -0.1434	0.009
Mean	1				0.923662				0.972962				0.847315					GDNF vs. GDNF+SPP	0.3653	0.07966 to 0.6508	0.0164			GDNF vs. G+SPP	0.6683	0.3341 to 1.002	0.0009
																		GDNF vs. GDNF+SB	0.1253	-0.1603 to 0.4108	0.3581			GDNF vs. G+SB	-0.1943	-0.5284 to 0.1399	0.2293
																		p-p38/p38
																		Test for normal distribution
																		Shapiro-Wilk test	Con	GDNF	GDNF+SPP	GDNF+SB
																		W	0.8087	0.8904	0.9893	0.8157
																		P value	0.1187	0.3851	0.9537	0.1335
																		Brown-Forsythe test
																		F (DFn, DFd)	1.246 (3, 12)
																		P value	0.3363
																		One way ANOVA tests
																		Uncorrected Fisher's LSD	Mean Diff.	95.00% CI of diff.	P Value
																		Con vs. GDNF	0.0765	-0.1411 to 0.2941	0.4585
																		GDNF vs. GDNF+SPP	-0.04925	-0.2669 to 0.1684	0.6308
																		GDNF vs. GDNF+SB	0.07625	-0.1414 to 0.2939	0.4599

## Sheet: Figure 3-3E
p-AKT/AKT																						p-AKT/AKT
Group	Con				GDNF				GDNF+0.25 Anti				GDNF+0.5 Anti				GDNF+1 Anti					Test for normal distribution
Relative Expression	0.946075	1.02913	0.965088	1.05971	1.35882	1.20755	1.3878	1.1802	0.955756	0.849103	0.939491	0.892743	0.821472	0.841362	0.864554	0.743064	0.717458	0.628219	0.812507	0.751879		Shapiro-Wilk test	Con	GDNF	GDNF+0.25 Anti	GDNF+0.5 Anti	GDNF+1.0 Anti
Mean	1				1.28359				0.909273				0.817613				0.727516					W	0.9223	0.8552	0.9434	0.9035	0.9857
																						P value	0.5497	0.2435	0.6752	0.4485	0.9347
p-ERK/ERK
Group	Con				GDNF				GDNF+0.25 Anti				GDNF+0.5 Anti				GDNF+1 Anti					Brown-Forsythe test
Relative Expression	0.810905	1.08168	1.10711	1.00031	1.31454	1.51106	1.30672	1.27656	0.926206	0.95388	0.643134	0.678446	1.05204	1.13794	0.522391	0.494062	0.857787	0.811388	0.649244	0.762035		F (DFn, DFd)	2.263 (4, 15)
Mean	1				1.35222				0.800417				0.801608				0.770113					P value	0.1108
																						One way ANOVA tests
																						Uncorrected Fisher's LSD	Mean Diff.	95.00% CI of diff.	P Value
																						Con vs. GDNF	-0.2837	-0.3899 to -0.1774	<0.0001
																						GDNF vs. GDNF+0.25 Anti	0.3744	0.2681 to 0.4807	<0.0001
																						GDNF vs. GDNF+0.50 Anti	0.466	0.3598 to 0.5723	<0.0001
																						GDNF vs. GDNF+1.00 Anti	0.5561	0.4499 to 0.6624	<0.0001
																						p-ERK/ERK
																						Test for normal distribution
																						Shapiro-Wilk test	Con	GDNF	GDNF+0.25 Anti	GDNF+0.5 Anti	GDNF+1.0 Anti
																						W	0.8745	0.7663	0.8218	0.8082	0.9542
																						P value	0.3155	0.0542	0.1474	0.1177	0.7423
																						Brown-Forsythe ANOVA test
																						F* (DFn, DFd)	6.695 (4.000, 6.608)
																						P value	0.0173
																						Welch's ANOVA test
																						W (DFn, DFd)	14.98 (4.000, 7.314)
																						P value	0.0013
																						P value summary	**
																						Dunnett's T3 multiple comparisons test	Mean Diff.	95.00% CI of diff.	P Value
																						Con vs. GDNF	-0.3522	-0.7532 to 0.04873	0.045
																						GDNF vs. GDNF+0.25 Anti	0.5518	0.05404 to 1.050	0.0161
																						GDNF vs. GDNF+0.50 Anti	0.5506	-0.5003 to 1.602	0.1954
																						GDNF vs. GDNF+1.00 Anti	0.5821	0.2558 to 0.9084	0.0013

## Sheet: Figure 3-3F
Claudin-5/β-actin																		Claudin-5/β-actin						VE-cadherin/β-actin
Group	Con				US-CM				US-CM+SPP				US-CM+LY					Test for normal distribution						Test for normal distribution
Relative Expression	0.850373	1.06416	0.730646	1.35482	1.79274	1.6112	1.93988	2.37732	1.15934	1.33504	1.37395	1.11763	0.652712	0.73575	0.784305	0.616325		Shapiro-Wilk test	Con	CM	CM+SPP	CM+LY		Shapiro-Wilk test	Con	CM	CM+SPP	CM+LY
Mean	1				1.93028				1.24649				0.697273					W	0.9588	0.9471	0.8727	0.9501		W	0.9324	0.7677	0.8073	0.9384
																		P value	0.7714	0.698	0.3083	0.717		P value	0.6084	0.0558	0.116	0.6446
VE-cadherin/β-actin
Group	Con				US-CM				US-CM+SPP				US-CM+LY					Brown-Forsythe test						Brown-Forsythe test
Relative Expression	1.11996	0.955997	0.84034	1.0837	1.49888	1.53165	1.87908	1.87773	0.447813	0.45147	0.78084	0.722113	0.387556	0.59839	0.597442	0.760032		F (DFn, DFd)	1.614 (3, 12)					F (DFn, DFd)	1.744 (3, 12)
Mean	1				1.69684				0.600559				0.585855					P value	0.238					P value	0.2112
p-AKT/AKT																		One way ANOVA tests						One way ANOVA tests
Group	Con				US-CM				US-CM+SPP				US-CM+LY					Uncorrected Fisher's LSD	Mean Diff.	95.00% CI of diff.	P Value			Uncorrected Fisher's LSD	Mean Diff.	95.00% CI of diff.	P Value
Relative Expression	0.965297	0.832352	1.25215	0.9502	1.38523	1.27071	1.36991	1.36082	0.267751	0.345071	0.388784	0.375518	0.381533	0.313887	0.414165	0.333176		Con vs. US-US-CM	-0.9303	-1.278 to -0.5825	<0.0001			Con vs. US-CM	-0.697	-0.9579 to -0.4361	<0.0001
Mean	1				1.34667				0.344281				0.36069					US-CM vs. US-CM+SPP	0.6838	0.3360 to 1.031	0.0011			US-CM vs. US-CM+SPP	1.097	0.8356 to 1.357	<0.0001
																		US-CM vs. US-CM+LY	1.233	0.8853 to 1.581	<0.0001			US-CM vs. US-CM+LY	1.111	0.8504 to 1.372	<0.0001
																		p-AKT/AKT
																		Test for normal distribution
																		Shapiro-Wilk test	Con	CM	CM+SPP	CM+LY
																		W	0.8881	0.8047	0.8836	0.949
																		P value	0.3742	0.1108	0.354	0.7096
																		Brown-Forsythe test
																		F (DFn, DFd)	0.9920 (3, 12)
																		P value	0.4295
																		One way ANOVA tests
																		Uncorrected Fisher's LSD	Mean Diff.	95.00% CI of diff.	P Value
																		Con vs. CM	-0.3467	-0.4997 to -0.1936	0.0003
																		CM vs. CM+SPP	1.002	0.8493 to 1.155	<0.0001
																		CM vs. CM+LY	0.986	0.8329 to 1.139	<0.0001

## Sheet: Figure 3-3G
Claudin-5/β-actin																		Claudin-5/β-actin						VE-cadherin/Tubulin
Group	Con				US-CM				US-CM+SPP				US-CM+U0					Test for normal distribution						Test for normal distribution
Relative Expression	1.05853	0.896553	0.894691	1.15023	1.35136	1.30331	1.81018	1.83557	0.526278	0.791434	1.16323	1.23189	0.599516	0.477998	1.00003	0.632763		Shapiro-Wilk test	Con	CM	CM+SPP	CM+U0		Shapiro-Wilk test	Con	CM	CM+SPP	CM+U0
Mean	1				1.57511				0.928209				0.677576					W	0.8588	0.7913	0.9123	0.8737		W	0.9681	0.8071	0.7656	0.8948
																		P value	0.2559	0.0875	0.4948	0.3125		P value	0.8297	0.1156	0.0535	0.4059
VE-cadherin/Tubulin
Group	Con				US-CM				US-CM+SPP				US-CM+U0					Brown-Forsythe test						Brown-Forsythe test
Relative Expression	0.795031	1.15814	0.970722	1.0761	1.34539	1.33306	1.52204	1.54651	0.843836	0.857733	0.741352	0.839212	0.755791	0.649289	0.662248	0.86766		F (DFn, DFd)	2.164 (3, 12)					F (DFn, DFd)	1.790 (3, 12)
Mean	1				1.43675				0.820533				0.733747					P value	0.1454					P value	0.2026
p-ERK/ERK																		One way ANOVA tests						One way ANOVA tests
Group	Con				US-CM				US-CM+SPP				US-CM+U0					Uncorrected Fisher's LSD	Mean Diff.	95.00% CI of diff.	P Value			Uncorrected Fisher's LSD	Mean Diff.	95.00% CI of diff.	P Value
Relative Expression	1.13648	1.02039	1.14084	0.702287	3.4698	2.92045	3.48226	2.86997	1.44487	1.89764	2.49713	2.18455	1.1514	1.25211	0.864354	1.04742		Con vs. US-CM	-0.5751	-0.9665 to -0.1837	0.0076			Con vs. CM	-0.4368	-0.6100 to -0.2635	0.0001
Mean	1				3.18562				2.00605				1.07882					US-CM vs. US-CM+SPP	0.6469	0.2555 to 1.038	0.0036			CM vs. CM+SPP	0.6163	0.4430 to 0.7895	<0.0001
																		US-CM vs. US-CM+U0	0.8976	0.5062 to 1.289	0.0003			CM vs. CM+U0	0.703	0.5298 to 0.8762	<0.0001
																		p-ERK/ERK
																		Test for normal distribution
																		Shapiro-Wilk test	Con	CM	CM+SPP	CM+U0
																		W	0.8077	0.7738	0.9909	0.979
																		P value	0.1167	0.063	0.9619	0.8962
																		Brown-Forsythe test
																		F (DFn, DFd)	2.129 (3, 12)
																		P value	0.1498
																		One way ANOVA tests
																		Uncorrected Fisher's LSD	Mean Diff.	95.00% CI of diff.	P Value
																		Con vs. US-CM	-2.186	-2.662 to -1.709	<0.0001
																		US-CM vs. US-CM+SPP	1.179	0.7027 to 1.656	0.0002
																		US-CM vs. US-CM+U0126	2.107	1.630 to 2.584	<0.0001

## Sheet: Figure 3-3H
Claudin-5/β-actin																		Claudin-5/β-actin						VE-cadherin/β-actin
Group	Con				US-CM				US-CM+SPP				US-CM+SP					Test for normal distribution						Test for normal distribution
Relative Expression	0.986253	1.2238	0.907227	0.882723	1.69964	1.48943	1.40804	1.53197	1.16198	1.13846	1.04886	0.882439	1.4679	1.12196	1.40776	1.29242		Shapiro-Wilk test	Con	CM	CM+SPP	CM+SP		Shapiro-Wilk test	Con	CM	CM+SPP	CM+SP
Mean	1				1.53227				1.05794				1.32251					W	0.8425	0.9504	0.8897	0.9495		W	0.9623	0.945	0.9206	0.9456
																		P value	0.2027	0.7187	0.3817	0.7129		P value	0.7931	0.6853	0.5404	0.6888
VE-cadherin/β-actin
Group	Con				US-CM				US-CM+SPP				US-CM+SP					Brown-Forsythe test						Brown-Forsythe test
Relative Expression	0.962791	1.17449	0.770763	1.09195	1.586	1.30104	1.23659	1.40011	0.703474	0.99751	0.967161	0.844833	1.60592	1.49985	1.04523	1.22324		F (DFn, DFd)	0.09576 (3, 12)					F (DFn, DFd)	1.318 (3, 12)
Mean	1				1.38093				0.878244				1.34356					P value	0.9609					P value	0.3142
p-JNK/JNK																		One way ANOVA tests						One way ANOVA tests
Group	Con				US-CM				US-CM+SPP				US-CM+SP					Uncorrected Fisher's LSD	Mean Diff.	95.00% CI of diff.	P Value			Uncorrected Fisher's LSD	Mean Diff.	95.00% CI of diff.	P Value
Relative Expression	1.05898	1.13159	0.877499	0.931929	0.861749	0.869617	0.953225	0.936764	0.963869	1.1078	0.920037	0.873698	1.02279	1.58846	1.01509	0.803994		Con vs. US-CM	-0.5323	-0.7483 to -0.3162	0.0002			Con vs. US-CM	-0.381	-0.6669 to -0.09514	0.0132
Mean	1				0.905339				0.966352				1.10759					US-CM vs. US-CM+SPP	0.4745	0.2584 to 0.6906	0.0004			US-CM vs. US-CM+SPP	0.5028	0.2169 to 0.7886	0.0024
																		US-CM vs. US-CM+SP	0.2098	-0.006327 to 0.4258	0.056			US-CM vs. US-CM+SP	0.0375	-0.2484 to 0.3234	0.7799
																		p-JNK/JNK
																		Test for normal distribution
																		Shapiro-Wilk test	Con	CM	CM+SPP	CM+SP
																		W	0.9485	0.8482	0.9195	0.8614
																		P value	0.7067	0.2205	0.5339	0.2654
																		Brown-Forsythe test
																		F (DFn, DFd)	0.9825 (3, 12)
																		P value	0.4335
																		One way ANOVA tests
																		Uncorrected Fisher's LSD	Mean Diff.	95.00% CI of diff.	P Value
																		Con vs. US-CM	0.0945	-0.1925 to 0.3815	0.4869
																		US-CM vs. US-CM+SPP	-0.061	-0.3480 to 0.2260	0.6516
																		US-CM vs. US-CM+SP	-0.202	-0.4890 to 0.08502	0.1511

## Sheet: Figure 3-3I
Claudin-5/β-actin																		Claudin-5/β-actin						VE-cadherin/Tubulin
Group	Con				US-CM				US-CM+SPP				US-CM+SB					Test for normal distribution						Test for normal distribution
Relative Expression	1.20499	1.38598	0.460363	0.948673	2.06755	1.90823	1.52109	1.46186	1.39907	1.17962	0.965678	0.804293	2.63135	2.19439	1.84036	1.94432		Shapiro-Wilk test	Con	CM	CM+SPP	CM+SB		Shapiro-Wilk test	Con	CM	CM+SPP	CM+SB
Mean	1				1.73968				1.08717				2.1526					W	0.9501	0.8857	0.9844	0.9211		W	0.8692	0.8163	0.966	0.9653
																		P value	0.717	0.3637	0.9274	0.543		P value	0.2945	0.1348	0.8163	0.8123
VE-cadherin/Tubulin
Group	Con				US-CM				US-CM+SPP				US-CM+SB					Brown-Forsythe test						Brown-Forsythe test
Relative Expression	0.948649	0.822204	1.11303	1.11612	1.70369	1.67726	1.73152	1.91134	1.10979	1.34976	1.37734	1.62557	2.07736	2.33994	1.71031	1.51267		F (DFn, DFd)	0.2074 (3, 12)					F (DFn, DFd)	3.287 (3, 12)
Mean	1				1.75595				1.36561				1.91007					P value	0.8893					P value	0.0583
p-p38/p38																		One way ANOVA tests						One way ANOVA tests
Group	Con				US-CM				US-CM+SPP				US-CM+SB					Uncorrected Fisher's LSD	Mean Diff.	95.00% CI of diff.	P Value			Uncorrected Fisher's LSD	Mean Diff.	95.00% CI of diff.	P Value
Relative Expression	0.610175	0.341211	0.963607	2.08501	0.802686	0.75583	1.2723	1.03233	0.847362	1.27731	1.3756	1.1761	2.72763	2.51938	2.00474	1.56672		Con vs. US-CM	-0.7398	-1.250 to -0.2290	0.0083			Con vs. US-CM	-0.756	-1.111 to -0.4008	0.0006
Mean	1				0.965787				1.16909				2.20462					US-CM vs. US-CM+SPP	0.6525	0.1418 to 1.163	0.0165			US-CM vs. US-CM+SPP	0.3903	0.03502 to 0.7455	0.0339
																		US-CM vs. US-CM+SB	-0.4125	-0.9232 to 0.09825	0.1039			US-CM vs. US-CM+SB	-0.154	-0.5092 to 0.2012	0.3635
																		p-p38/p38
																		Test for normal distribution
																		Shapiro-Wilk test	Con	CM	CM+SPP	CM+SB
																		W	0.8959	0.9144	0.9142	0.9527
																		P value	0.4111	0.5062	0.5052	0.733
																		Brown-Forsythe test
																		F (DFn, DFd)	1.409 (3, 12)
																		P value	0.2881
																		One way ANOVA tests
																		Uncorrected Fisher's LSD	Mean Diff.	95.00% CI of diff.	P Value
																		Con vs. US-CM	0.03425	-0.7246 to 0.7931	0.9233
																		US-CM vs. US-CM+SPP	-0.2033	-0.9621 to 0.5556	0.5703
																		US-CM vs. US-CM+SB	-1.239	-1.998 to -0.4802	0.0039

## Sheet: Figure 3-3J
p-AKR/AKT																		p-AKT/AKT
Group	Con				US-CM				US-CM+0.5 Anti				US-CM+1.0 Anti					Test for normal distribution
Relative Expression	1.0872	1.0145	0.833856	1.06444	1.70547	1.42577	1.50477	1.49759	1.49013	1.25005	1.33038	1.3361	1.089	0.90032	1.30608	1.15041		Shapiro-Wilk test	Con	US-CM	US-CM+0.5 Anti	US-CM+1.0 Anti
Mean	1				1.5334				1.35166				1.11145					W	0.8422	0.8646	0.9122	0.989
																		P value	0.2018	0.2771	0.4941	0.9524
p-ERK/ERK
Group	Con				US-CM				US-CM+0.5 Anti				US-CM+1.0 Anti					Brown-Forsythe test
Relative Expression	0.910006	1.17724	0.72752	1.18524	1.63757	1.32361	1.4456	1.49537	1.04178	1.16757	1.21839	1.25056	1.17348	1.25987	1.08651	0.897352		F (DFn, DFd)	0.2958 (3, 12)
Mean	1				1.47554				1.16958				1.1043					P value	0.8277
																		One way ANOVA tests
																		Uncorrected Fisher's LSD	Mean Diff.	95.00% CI of diff.	P Value
																		Con vs. US-CM	-0.5338	-0.7312 to -0.3363	<0.0001
																		US-CM vs. US-CM+0.5 Anti	0.182	-0.01550 to 0.3795	0.0677
																		US-CM vs. US-CM+1.0 Anti	0.4223	0.2248 to 0.6197	0.0006
																		p-ERK/ERK
																		Test for normal distribution
																		Shapiro-Wilk test	Con	US-CM	US-CM+0.5 Anti	US-CM+1.0 Anti
																		W	0.8705	0.9916	0.9133	0.9634
																		P value	0.2997	0.9654	0.5001	0.8002
																		Brown-Forsythe test
																		F (DFn, DFd)	1.553 (3, 12)
																		P value	0.2519
																		One way ANOVA tests
																		Uncorrected Fisher's LSD	Mean Diff.	95.00% CI of diff.	P Value
																		Con vs. US-CM	-0.4755	-0.7176 to -0.2335	0.0011
																		US-CM vs. US-CM+0.5 Anti	0.306	0.06395 to 0.5480	0.0175
																		US-CM vs. US-CM+1.0 Anti	0.3712	0.1292 to 0.6132	0.0059
