# Supplementary material for: Neurons enhance blood–brain barrier function via upregulating claudin-5 and VE-cadherin expression due to glial cell line-derived neurotrophic factor secretion
Source: eLife. 2024 Oct 30;13:RP96161. doi: 10.7554/eLife.96161 (PMC11524583; doi:10.7554/eLife.96161)
Supplement: Figure 4—figure supplement 1—source data 3. [file elife-96161-fig4-figsupp1-data3.xlsx]

## Sheet: Figure 4—figure supplement 1A,B
2-△△Ct	Con			siVE-Cad				CDH5					CLDN5
CDH5	1.06808	0.904497	1.03511	0.169406	0.161921	0.209724		Test for normal distribution					Test for normal distribution
CLDN5	1.23923	0.839759	0.96093	0.971433	0.842156	0.819093		Shapiro-Wilk test	Con	siVE-Cad			Shapiro-Wilk test	Con	siVE-Cad
								W	0.8938	0.8641			W	0.9509	0.8608
								P value	0.3662	0.279			P value	0.5733	0.2696
								F test to compare variances					F test to compare variances
								F, DFn, Dfd	11.32, 2, 2				F, DFn, Dfd	6.225, 2, 2
								P value	0.1623				P value	0.2768
								Unpaired t test					Unpaired t test
								P value	<0.0001				P value	0.3467

## Sheet: Figure 4—figure supplement 1C
Claudin-5/β-actin																		Claudin-5/β-actin						VE-Cadherin/β-actin
Group	NC				G+NC				siVE-Cad				G+siVE-Cad					Test for normal distribution						Test for normal distribution
Relative Expression	0.725635	1.00968	1.08374	1.18094	1.54185	1.30457	1.40116	1.53463	0.864035	1.08773	1.11151	0.965875	1.38912	1.29953	1.22009	1.24344		Shapiro-Wilk test	NC	G+NC	siVE-Cad	G+siVE-Cad		Shapiro-Wilk test	NC	G+NC	siVE-Cad	G+siVE-Cad
Mean	1				1.44555				1.00729				1.28805					W	0.9186	0.8782	0.916	0.9287		W	0.8809	0.9752	0.9154	0.983
																		P value	0.5292	0.3311	0.5149	0.5869		P value	0.3427	0.8731	0.5114	0.9193
VE-cadherin/β-actin
Group	NC				G+NC				siVE-Cad				G+siVE-Cad					Brown-Forsythe test						Brown-Forsythe test
Relative Expression	0.87289	1.01418	1.26876	0.844167	1.58473	1.54408	1.49688	1.53729	0.505195	0.663324	0.627543	0.534875	1.10382	0.875814	0.785328	0.95162		F (DFn, DFd)	0.6320 (3, 12)					F (DFn, DFd)	1.866 (3, 12)
Mean	1				1.54075				0.582734				0.929146					P value	0.6084					P value	0.1892
																		One way ANOVA tests						One way ANOVA tests
																		Uncorrected Fisher's LSD	Mean Diff.	95.00% CI of diff.	P Value			Uncorrected Fisher's LSD	Mean Diff.	95.00% CI of diff.	P Value
																		NC vs. G+NC	-0.4455	-0.6497 to -0.2413	0.0005			NC vs. G+NC	-0.5408	-0.7338 to -0.3477	<0.0001
																		NC vs. G+si-VE-Cad	-0.2878	-0.4919 to -0.08358	0.0097			NC vs. si-VE-Cad	0.4173	0.2242 to 0.6103	0.0005
