# Supplementary material for: Neurons enhance blood–brain barrier function via upregulating claudin-5 and VE-cadherin expression due to glial cell line-derived neurotrophic factor secretion
Source: eLife. 2024 Oct 30;13:RP96161. doi: 10.7554/eLife.96161 (PMC11524583; doi:10.7554/eLife.96161)
Supplement: Figure 4—source data 3. [file elife-96161-fig4-data3.xlsx]

## Sheet: Figure 4-4A
p-FOXO1/FOXO1														p-FOXO1/FOXO1
Group	Con				CM				GDNF					Test for normal distribution
Relative Expression	0.956626	1.28975	0.710156	1.04347	1.62269	2.00707	1.31535	1.42402	2.50971	2.15275	1.98678	1.52539		Shapiro-Wilk test	Con	CM	GDNF
Mean	1				1.59228				2.04366					W	0.9919	0.9303	0.9896
														P value	0.9669	0.5964	0.9553
FOXO1/β-actin
Group	Con				CM				GDNF					Brown-Forsythe test
Relative Expression	1.01796	0.870328	1.1113	1.00042	0.790576	0.686513	0.949931	0.940968	0.630872	0.772979	0.798429	1.00654		F (DFn, DFd)	0.3983 (2, 9)
Mean	1				0.841997				0.802205					P value	0.6827
														One way ANONVA tests
														Uncorrected Fisher's LSD	Mean Diff.	95.00% CI of diff.	P Value
														Con vs. CM	-0.5923	-1.112 to -0.07209	0.0299
														Con vs. GDNF	-1.044	-1.564 to -0.5236	0.0014
														FOXO1/β-actin
														Test for normal distribution
														Shapiro-Wilk test	Con	CM	GDNF
														W	0.9624	0.8799	0.9559
														P value	0.7941	0.338	0.7532
														Brown-Forsythe test
														F (DFn, DFd)	0.3065 (2, 9)
														P value	0.7434
														One way ANONVA tests
														Uncorrected Fisher's LSD	Mean Diff.	95.00% CI of diff.	P Value
														Con vs. CM	0.1575	-0.04884 to 0.3638	0.1183
														Con vs. GDNF	0.1975	-0.008839 to 0.4038	0.0586

## Sheet: Figure 4-4B
Cytoplasm Protein														p-FOXO1/GAPDH					FOXO1/GAPDH
p-FOXO1/GAPDH														Test for normal distribution					Test for normal distribution
Group	Con				CM				GDNF					Shapiro-Wilk test	Con	CM	GDNF		Shapiro-Wilk test	Con	CM	GDNF
Relative Expression	0.942942	0.997459	1.10207	0.957526	1.2525	1.34052	1.21552	1.31084	1.64743	1.84961	1.52334	1.38558		W	0.8687	0.9605	0.9901		W	0.9067	0.8845	0.9447
Mean	1				1.27985				1.60149					P value	0.2927	0.7818	0.9579		P value	0.4653	0.3582	0.6834
FOXO1/GAPDH														Brown-Forsythe test					Brown-Forsythe test
Group	Con				CM				GDNF					F (DFn, DFd)	2.975 (2, 9)				F (DFn, DFd)	0.7632 (2, 9)
Relative Expression	0.911141	0.95964	1.13824	0.990976	1.17055	1.61974	1.5191	1.6972	1.49388	1.60949	1.83968	1.77845		P value	0.1019				P value	0.4941
Mean	1				1.50165				1.68037
														One way ANONVA tests					One way ANONVA tests
														Uncorrected Fisher's LSD	Mean Diff.	95.00% CI of diff.	P Value		Uncorrected Fisher's LSD	Mean Diff.	95.00% CI of diff.	P Value
Nucleus Protein														Con vs. CM	-0.2803	-0.4807 to -0.07978	0.0115		Con vs. CM	-0.5018	-0.7764 to -0.2271	0.0025
FOXO1/Lamin B														Con vs. GDNF	-0.6015	-0.8020 to -0.4010	<0.0001		Con vs. GDNF	-0.6803	-0.9549 to -0.4056	0.0003
Group	Con				CM				GDNF
Relative Expression	0.884626	1.00647	1.09851	1.0104	0.853666	0.81294	0.663455	0.63617	0.49932	0.67403	0.51889	0.530884
Mean	1				0.741558				0.555781					FOXO1/Lamin B
														Test for normal distribution
														Shapiro-Wilk test	Con	CM	GDNF
														W	0.9424	0.8712	0.78
														P value	0.6688	0.3025	0.0709
														Brown-Forsythe test
														F (DFn, DFd)	0.7809 (2, 9)
														P value	0.4867
														One way ANONVA tests
														Uncorrected Fisher's LSD	Mean Diff.	95.00% CI of diff.	P Value
														Con vs. CM	0.2585	0.1102 to 0.4068	0.0034
														Con vs. GDNF	0.4443	0.2959 to 0.5926	<0.0001

## Sheet: Figure 4-4C
FOXO1/β-actin																		FOXO1/β-actin
Group	NC				GDNF+NC				siFOXO1				GDNF+siFOXO1					Test for normal distribution
Relative Expression	0.961439	0.804444	1.0785	1.15561	0.68059	0.75713	1.05464	0.816837	0.627924	0.656676	0.687846	0.717728	0.544991	0.6283	0.561955	0.538207		Shapiro-Wilk test	NC	GDNF	siFOXO1	GDNF+siFOXO1
Mean	1				0.827298				0.672543				0.568363					W	0.9701	0.9106	0.9911	0.826
																		P value	0.8421	0.4855	0.963	0.1577
FOXO1/Lamin B
Group	NC				GDNF+NC				siFOXO1				GDNF+siFOXO1					Brown-Forsythe test
Relative Expression	1.16566	0.888368	1.06506	0.880912	0.723063	0.62562	0.713931	0.63674	0.475584	0.377025	0.568871	0.714557	0.397514	0.296038	0.494318	0.430831		F (DFn, DFd)	1.962 (3, 12)
Mean	1				0.674839				0.534009				0.404675					P value	0.1736
																		One way ANONVA tests
																		Uncorrected Fisher's LSD	Mean Diff.	95.00% CI of diff.	P Value
																		NC vs. GDNF	0.1725	-0.004512 to 0.3495	0.0552
																		NC vs. siFOXO1	0.3273	0.1502 to 0.5043	0.0017
																		NC vs. GDNF+siFOXO1	0.4318	0.2547 to 0.6088	0.0002
																		FOXO1/Lamin B
																		Test for normal distribution
																		Shapiro-Wilk test	NC	GDNF	siFOXO1	GDNF+siFOXO1
																		W	0.868	0.8235	0.9901	0.9764
																		P value	0.2899	0.1514	0.9582	0.8803
																		Brown-Forsythe test
																		F (DFn, DFd)	1.981 (3, 12)
																		P value	0.1707
																		One way ANONVA tests
																		Uncorrected Fisher's LSD	Mean Diff.	95.00% CI of diff.	P Value
																		NC vs. GDNF	0.325	0.1535 to 0.4965	0.0014
																		NC vs. siFOXO1	0.4658	0.2943 to 0.6372	<0.0001
																		NC vs. GDNF+siFOXO1	0.5953	0.4238 to 0.7667	<0.0001

## Sheet: Figure 4-4D
Claudin-5/β-actin																		Claudin-5/β-actin
Group	NC				GDNF+NC				siFOXO1				GDNF+siFOXO1					Test for normal distribution
Relative Expression	1.22906	1.11023	0.805165	0.855544	1.7906	1.58084	1.23122	1.74849	1.80188	1.67844	1.68371	1.70169	1.96092	1.84024	2.15151	1.83105		Shapiro-Wilk test	NC	GDNF	siFOXO1	GDNF+siFOXO1
Mean	1				1.58778				1.71643				1.94593					W	0.9028	0.8763	0.7736	0.8634
																		P value	0.4453	0.3232	0.0627	0.2727
VE-cadherin/β-actin
Group	NC				GDNF+NC				siFOXO1				GDNF+siFOXO1					Brown-Forsythe test
Relative Expression	0.619985	1.20377	1.06359	1.11265	1.74755	1.48163	1.48035	1.45695	1.07839	0.820151	0.777048	1.01216	1.56503	1.61392	1.22445	1.45941		F (DFn, DFd)	1.664 (3, 12)
Mean	1				1.54162				0.921937				1.4657					P value	0.2274
																		One way ANONVA tests
																		Uncorrected Fisher's LSD	Mean Diff.	95.00% CI of diff.	P Value
																		NV vs. NC+GDNF	-0.5878	-0.8672 to -0.3083	0.0006
																		NC vs. siFOXO1	-0.7165	-0.9959 to -0.4371	0.0001
																		NC vs. siFOXO1+GDNF	-0.946	-1.225 to -0.6666	<0.0001
																		NC+GDNF vs. siFOXO1+GDNF	-0.3583	-0.6377 to -0.07880	0.0162
																		VE-cadherin/β-actin
																		Test for normal distribution
																		Shapiro-Wilk test	NC	GDNF	siFOXO1	GDNF+siFOXO1
																		W	0.8266	0.7028	0.8929	0.9035
																		P value	0.1591	0.0125	0.3968	0.4488
																		Kruskal-Wallis test
																		P value	0.0008
																		Exact or approximate P value?	Exact
																		P value summary	***
																		Kruskal-Wallis statistic	11.51
																		Uncorrected Dunn's test	Mean rank diff.	P Value
																		NV vs. NC+GDNF	-7.5	0.0259
																		NC vs. siFOXO1	1.5	0.6559
																		NC vs. siFOXO1+GDNF	-7	0.0376
																		NC+GDNF vs. siFOXO1+GDNF	0.5	0.8819

## Sheet: Figure 4-4E
Claudin-5/β-actin																		Claudin-5/β-actin						FOXO1/β-actin
Group	FOXO1-NC				FOXO1-NC+GDNF				FOXO1-OE				FOXO1-OE+GDNF					Test for normal distribution						Test for normal distribution
Relative Expression	1.13735	0.921439	0.903033	1.03818	1.33656	1.46206	1.31716	1.34021	0.756542	0.798299	0.777724	0.778463	0.749083	0.486583	0.708677	0.679526		Shapiro-Wilk test	FOXO1-NC	FOXO1-NC+GDNF	FOXO1-OE	FOXO1-OE+GDNF		Shapiro-Wilk test	FOXO1-NC	FOXO1-NC+GDNF	FOXO1-OE	FOXO1-OE+GDNF
Mean	1				1.364				0.777757				0.655967					W	0.9063	0.7646	0.9444	0.8421		W	0.7028	0.7733	0.8569	0.7872
																		P value	0.4629	0.0524	0.6812	0.2015		P value	0.0125	0.0624	0.2491	0.0812
FOXO1/β-actin
Group	FOXO1-NC				FOXO1-NC+GDNF				FOXO1-OE				FOXO1-OE+GDNF					Brown-Forsythe test						Kruskal-Wallis test
Relative Expression	0.90084	1.33947	0.899438	0.860254	1.0835	1.0728	0.926092	1.10444	1.45489	1.49518	1.51178	1.33149	1.69224	1.47854	1.72643	1.47893		F (DFn, DFd)	1.380 (3, 12)					P value	0.001
Mean	1				1.04671				1.44834				1.59403					P value	0.2963					Exact or approximate P value?	Exact
																								P value summary	**
FOXO1/Lamin B																		One way ANONVA tests						Kruskal-Wallis statistic	11.33
Group	FOXO1-NC				FOXO1-NC+GDNF				FOXO1-OE				FOXO1-OE+GDNF					Uncorrected Fisher's LSD	Mean Diff.	Summary	P Value
Relative Expression	1.00199	0.872768	1.10521	1.02003	0.723122	0.698473	0.803939	0.856596	1.73076	1.6855	1.6899	1.79633	1.8696	1.83146	1.54899	1.50923		FOXO1-NC vs. FOXO1-NC+GDNF	-0.3643	****	<0.0001			Uncorrected Dunn's test	Mean rank diff.	P Value
Mean	1				0.770533				1.72562				1.68982					FOXO1-NC vs. FOXO1-OE	0.222	**	0.0035			FOXO1-NC vs. FOXO1-NC+GDNF	-1.75	0.6029
																		FOXO1-NC+GDNF vs. FOXO1-OE+GDNF	0.7078	****	<0.0001			FOXO1-NC vs. FOXO1-OE	-7.5	0.0258
																								FOXO1-NC vs. FOXO1-OE+GDNF	-9.75	0.0038
																		FOXO1/Lamin B
																		Test for normal distribution
																		Shapiro-Wilk test	FOXO1-NC	FOXO1-NC+GDNF	FOXO1-OE	FOXO1-OE+GDNF
																		W	0.9575	0.9349	0.8741	0.8295
																		P value	0.7631	0.6232	0.3142	0.1664
																		Brown-Forsythe ANOVA test
																		F* (DFn, DFd)	71.90 (3.000, 6.077)
																		P value	<0.0001
																		Welch's ANOVA test
																		W (DFn, DFd)	145.9 (3.000, 6.284)
																		P value	<0.0001
																		Dunnett's T3 multiple comparisons test	Mean Diff.	95.00% CI of diff.	P Value
																		FOXO1-NC vs. FOXO1-NC+GDNF	0.2295	-0.02946 to 0.4885	0.0427
																		FOXO1-NC vs. FOXO1-OE	-0.7255	-0.9800 to -0.4710	0.0002
																		FOXO1-NC vs. FOXO1-OE+GDNF	-0.6898	-1.252 to -0.1277	0.012

## Sheet: Figure 4-4F
Whole cell lysate																		p-FOXO1/FOXO1						p-FOXO1/GAPDH
p-FOXO1/FOXO1																		Test for normal distribution						Test for normal distribution
Group	Con				GDNF				GDNF+LY				GDNF+U0					Shapiro-Wilk test	Con	GDNF	GDNF+LY	GDNF+U0		Shapiro-Wilk test	Con	GDNF	GDNF+LY	GDNF+U0
Relative Expression	1.17649	0.974563	0.731369	1.11757	1.50151	1.20484	1.4265	1.31411	0.964575	1.09669	1.05866	0.960545	1.32784	1.3164	1.26572	1.47643		W	0.9216	0.9796	0.853	0.8731		W	0.9473	0.9282	0.9996	0.8578
Mean	1				1.36174				1.02012				1.3466					P value	0.5462	0.8998	0.236	0.3098		P value	0.6991	0.5837	0.9989	0.2526
																		Brown-Forsythe test						Brown-Forsythe test
Cytoplasm protein																		F (DFn, DFd)	1.393 (3, 12)					F (DFn, DFd)	2.174 (3, 12)
p-FOXO1/GAPDH																		P value	0.2925					P value	0.144
Group	Con				GDNF				GDNF+LY				GDNF+U0
Relative Expression	0.944977	1.00829	0.88565	1.16108	1.31665	1.38747	1.87742	1.66003	1.04602	0.927894	0.855541	0.74724	1.43764	1.7042	1.46541	1.52132		One way ANONVA tests						One way ANONVA tests
Mean	1				1.56039				0.894173				1.53214					Uncorrected Fisher's LSD	Mean Diff.	95.00% CI of diff.	P Value			Uncorrected Fisher's LSD	Mean Diff.	95.00% CI of diff.	P Value
																		Con vs. GDNF	-0.3618	-0.5641 to -0.1594	0.0021			Con vs. GDNF	-0.5603	-0.8164 to -0.3041	0.0005
FOXO1/GAPDH																		Con vs. GDNF+LY	-0.0205	-0.2229 to 0.1819	0.829			Con vs. GDNF+LY	0.1058	-0.1504 to 0.3619	0.3861
Group	Con				GDNF				GDNF+LY				GDNF+U0					Con vs. GDNF+U0	-0.3465	-0.5489 to -0.1441	0.0029			Con vs. GDNF+U0	-0.532	-0.7882 to -0.2758	0.0007
Relative Expression	0.854328	0.980755	1.00482	1.16009	1.34927	1.3349	1.67287	1.57034	1.20729	1.31896	1.30862	1.10473	1.65356	1.64015	1.55511	1.36172		GDNF vs. GDNF+LY	0.3413	0.1389 to 0.5436	0.0032			GDNF vs. GDNF+LY	0.666	0.4098 to 0.9222	0.0001
Mean	1				1.48184				1.2349				1.55263					GDNF vs. GDNF+U0	0.01525	-0.1871 to 0.2176	0.8723			GDNF vs. GDNF+U0	0.02825	-0.2279 to 0.2844	0.8142
Nucleus Protein																		FOXO1/GAPDH						FOXO1/Lamin B
FOXO1/Lamin B																		Test for normal distribution						Test for normal distribution
Group	Con				GDNF				GDNF+LY				GDNF+U0					Shapiro-Wilk test	Con	GDNF	GDNF+LY	GDNF+U0		Shapiro-Wilk test	Con	GDNF	GDNF+LY	GDNF+U0
Relative Expression	0.993482	1.03055	1.11641	0.859562	0.816998	0.782591	0.75781	0.646732	1.04036	1.16979	0.896264	1.1345	0.316176	0.289897	0.676395	0.544926		W	0.9708	0.8667	0.8906	0.8506		W	0.9751	0.9012	0.9269	0.8895
Mean	1				0.751033				1.06023				0.456849					P value	0.8466	0.285	0.3857	0.228		P value	0.873	0.4369	0.5766	0.3806
																		Brown-Forsythe test						Brown-Forsythe test
																		F (DFn, DFd)	0.6102 (3, 12)					F (DFn, DFd)	2.057 (3, 12)
																		P value	0.6211					P value	0.1595
																		One way ANONVA tests						One way ANONVA tests
																		Uncorrected Fisher's LSD	Mean Diff.	95.00% CI of diff.	P Value			Uncorrected Fisher's LSD	Mean Diff.	95.00% CI of diff.	P Value
																		Con vs. GDNF	-0.4818	-0.6881 to -0.2754	0.0003			Con vs. GDNF	0.2488	0.05052 to 0.4470	0.0181
																		Con vs. GDNF+LY	-0.235	-0.4414 to -0.02864	0.0289			Con vs. GDNF+LY	-0.06	-0.2582 to 0.1382	0.522
																		Con vs. GDNF+U0	-0.5528	-0.7591 to -0.3464	<0.0001			Con vs. GDNF+U0	0.5433	0.3450 to 0.7415	<0.0001
																		GDNF vs. GDNF+LY	0.2468	0.04039 to 0.4531	0.023			GDNF vs. GDNF+LY	-0.3088	-0.5070 to -0.1105	0.0053
																		GDNF vs. GDNF+U0	-0.071	-0.2774 to 0.1354	0.4679			GDNF vs. GDNF+U0	0.2945	0.09627 to 0.4927	0.0071

## Sheet: Figure 4-4G
Claudin-5/β-actin																						Claudin-5/β-actin
Group	NC				G+NC				siFOXO1				G+siFOXO1				G+siFOXO1+LY					Test for normal distribution
Relative Expression	1.40815	0.974869	0.649462	0.967514	1.46472	1.89551	1.37754	1.59622	1.98666	2.00157	1.64635	1.82372	2.18019	2.38667	1.98101	2.12715	1.64039	1.34481	1.3459	1.11		Shapiro-Wilk test	NC	G+NC	siFOXO1	G+isFOXO1	G+siFOXO1+LY
Mean	1				1.5835				1.86458				2.16876				1.36027					W	0.9382	0.9269	0.8867	0.9779	0.9397
																						P value	0.6433	0.5761	0.3682	0.8894	0.6522
FOXO1/β-actin
Group	NC				G+NC				siFOXO1				G+siFOXO1				G+siFOXO1+LY					Brown-Forsythe test
Relative Expression	1.18455	0.845061	1.10441	0.865985	0.996986	0.81702	0.934862	0.825179	0.275155	0.488293	0.272356	0.269805	0.593885	0.574651	0.287762	0.3535	0.521395	0.336011	0.311289	0.235103		Brown-Forsythe test	0.1686 (4, 15)
Mean	1				0.893512				0.326402				0.45245				0.35095					Brown-Forsythe test	0.951
																						One way ANONVA tests
																						Uncorrected Fisher's LSD	Mean Diff.	95.00% CI of diff.	P Value
																						NC vs. G+NC	-0.5835	-0.9215 to -0.2455	0.0022
																						NC vs. siFOXO1	-0.8646	-1.203 to -0.5266	<0.0001
																						NC vs. G+siFOXO1	-1.169	-1.507 to -0.8308	<0.0001
																						G+siFOXO1 vs. G+siFOXO1+LY	0.8085	0.4705 to 1.146	0.0001
																						FOXO1/β-actin
																						Test for normal distribution
																						Shapiro-Wilk test	NC	G+NC	siFOXO1	G+isFOXO1	G+siFOXO1+LY
																						W	0.8581	0.8776	0.6475	0.8503	0.9119
																						P value	0.2533	0.3283	0.0024	0.227	0.4923
																						Kruskal-Wallis test
																						P value	0.0044
																						Exact or approximate P value?	Approximate
																						P value summary	**
																						Number of groups	5
																						Kruskal-Wallis statistic	15.14
																						Uncorrected Dunn's test	Mean rank diff.	P Value
																						NC vs. G+NC	2	0.6326
																						NC vs. siFOXO1	13	0.0019
																						NC vs. G+siFOXO1	8.5	0.0422
																						NC vs. G+siFOXO1+LY	11.5	0.006
