# Supplementary material for: Neurons enhance blood–brain barrier function via upregulating claudin-5 and VE-cadherin expression due to glial cell line-derived neurotrophic factor secretion
Source: eLife. 2024 Oct 30;13:RP96161. doi: 10.7554/eLife.96161 (PMC11524583; doi:10.7554/eLife.96161)
Supplement: Figure 6—source data 3. [file elife-96161-fig6-data3.xlsx]

## Sheet: Figure 6-6B
GDNF/β-actin														GDNF/β-actin				Claudin-5/β-actin
Group	shNC						shGdnf							Test for normal distribution				Test for normal distribution
Relative Expression	0.832999	0.859692	0.73902	0.923262	1.36204	1.28298	0.387569	0.405482	0.39753	0.752595	0.599975	0.481038		Shapiro-Wilk test	shNC	shGdnf		Shapiro-Wilk test	shNC	shGdnf
Mean	1						0.504032							W	0.8522	0.8364		W	0.9757	0.9561
														P value	0.164	0.1217		P value	0.9282	0.7889
Claudin-5/β-actin
Group	shNC						shGdnf							F test to compare variances				F test to compare variances
Relative Expression	1.25023	1.04609	0.877184	1.15286	0.998798	0.674831	0.610669	0.784975	0.546144	0.628963	0.63585	0.429638		F, DFn, Dfd	3.131, 5, 5			F, DFn, Dfd	3.067, 5, 5
Mean	1						0.60604							P value	0.2359			P value	0.2441
VE-cadherin/β-actin														Unpaired t test				Unpaired t test
Group	shNC						shGdnf							shNC vs. shGdnf				shNC vs. shGdnf
Relative Expression	1.19172	1.25534	0.830587	0.978598	1.01429	0.729459	0.498558	0.522739	0.417011	0.421905	0.364197	0.47553		P value	0.0021			P value	0.0021
Mean	1						0.44999
														Difference between means (B - A) ± SEM	-0.4958 ± 0.1210			Difference between means (B - A) ± SEM	-0.3938 ± 0.09606
														95% confidence interval	-0.7653 to -0.2263			95% confidence interval	-0.6079 to -0.1798
														R squared (eta squared)	0.6269			R squared (eta squared)	0.627
														VE-cadherin/β-actin
														Test for normal distribution
														Shapiro-Wilk test	shNC	shGdnf
														W	0.9579	0.9564
														P value	0.8035	0.7916
														F test to compare variances
														F, DFn, Dfd	11.57, 5, 5
														P value	0.0178
														Unpaired t test with Welch's correction
														shNC vs. shGdnf
														P value	0.0008
														Difference between means (B - A) ± SEM	-0.5498 ± 0.08606
														95% confidence interval	-0.7617 to -0.3380
														R squared (eta squared)	0.8745

## Sheet: Figure 6-6C-E
	Brain Conc.(ng/g)	Plasma Conc.(ng/ml)	Ratio of brain to plasma (g/ml)		Plasma				Brain				Ratio of brain to plasma
					Test for normal distribution				Test for normal distribution				Test for normal distribution
shNC	93.6099	3227.91	0.0290002		Shapiro-Wilk test	shNC	shGdnf		Shapiro-Wilk test	shNC	shGdnf		Shapiro-Wilk test	shNC	shGdnf
	167.148	3376.96	0.0494966		W	0.854	0.7978		W	0.9239	0.8982		W	0.9465	0.9234
	138.053	2031.29	0.0679633		P value	0.1696	0.0562		P value	0.534	0.3635		P value	0.7119	0.5299
	145.689	3188.77	0.0456882
	143.552	2868.9	0.0500371		F test to compare variances				F test to compare variances				F test to compare variances
	179.295	2843.62	0.0630517		F, DFn, Dfd	8.296, 5, 5			F, DFn, Dfd	9.752, 5, 5			F, DFn, Dfd	1.358, 5, 5
shGdnf	311.112	2548.93	0.122056		P value	0.0366			P value	0.0259			P value	0.7455
	448.923	5776.87	0.0777104
	175.921	1790.45	0.0982548		Unpaired t test with Welch's correction				Unpaired t test with Welch's correction				Unpaired t test
	251.967	3131.47	0.0804626		shNC vs. shGdnf				shNC vs. shGdnf				shNC vs. shGdnf
	265.999	2807.24	0.0947545		P value	0.8054			P value	0.0127			P value	0.0004
	244.868	2412.95	0.101481
					Difference between means (B - A) ± SEM	155.1 ± 603.2			Difference between means (B - A) ± SEM	138.6 ± 39.52			Difference between means (B - A) ± SEM	0.04483 ± 0.008626
					95% confidence interval	-1310 to 1620			95% confidence interval	41.93 to 235.2			95% confidence interval	0.02561 to 0.06405
					R squared (eta squared)	0.01057			R squared (eta squared)	0.6715			R squared (eta squared)	0.7298

## Sheet: Figure 6-6F-H
	Brain Conc.(ng/g)	Plasma Conc.(ng/ml)	Ratio of brain to plasma (g/ml)		Plasma				Brain				Ratio of brain to plasma
					Test for normal distribution				Test for normal distribution				Test for normal distribution
shNC	0.83965	42.8587	0.0195911		Shapiro-Wilk test	shNC	shGdnf		Shapiro-Wilk test	shNC	shGdnf		Shapiro-Wilk test	shNC	shGdnf
	0.823177	34.4657	0.023884		W	0.841	0.8409		W	0.87	0.9626		W	0.9257	0.8361
	1.08212	31.484	0.0343706		P value	0.1328	0.1327		P value	0.2264	0.8398		P value	0.5472	0.121
	0.226655	31.0414	0.0073017
	0.104264	36.0438	0.0028927		F test to compare variances				F test to compare variances				F test to compare variances
	0.0225332	32.337	0.000696823		F, DFn, Dfd	39.97, 5, 5			F, DFn, Dfd	9.387, 5, 5			F, DFn, Dfd	3.532, 5, 5
shGdnf	0.715543	27.5651	0.0259583		P value	0.001			P value	0.0281			P value	0.1923
	3.77757	92.5789	0.0408037
	2.73346	91.2031	0.0299711		Unpaired t test with Welch's correction				Unpaired t test with Welch's correction				Unpaired t test
	1.30461	47.3999	0.0275234		shNC vs. shGdnf				shNC vs. shGdnf				shNC vs. shGdnf
	4.28175	48.1397	0.0889443		P value	0.1066			P value	0.015			P value	0.0228
	2.24256	36.1675	0.062005
					Difference between means (B - A) ± SEM	22.47 ± 11.55			Difference between means (B - A) ± SEM	1.993 ± 0.5932			Difference between means (B - A) ± SEM	0.03108 ± 0.01157
					95% confidence interval	-6.808 to 51.75			95% confidence interval	0.5444 to 3.441			95% confidence interval	0.005309 to 0.05685
					R squared (eta squared)	0.4188			R squared (eta squared)	0.6509			R squared (eta squared)	0.4193

## Sheet: Figure 6-6I and 6J
p-AKT/AKT														p-AKT/AKT
Group	shNC						shGdnf							Test for normal distribution
Relative Expression	1.06158	1.37142	0.877541	1.034	0.982096	0.673364	0.653242	0.577455	0.434602	0.454214	0.373622	0.22578		Shapiro-Wilk test	shNC	shGdnf
Mean	1						0.453153							W	0.9633	0.9785
														P value	0.8447	0.9438
p-ERK/ERK
Group	shNC						shGdnf							F test to compare variances
Relative Expression	1.15145	0.919812	0.80893	0.783001	1.11263	1.22418	0.697084	0.387133	0.376939	0.741968	0.584566	0.394326		F, DFn, Dfd	2.333, 5, 5
Mean	1						0.530336							P value	0.3739
														Unpaired t test
														shNC vs. shGdnf
														P value	0.0007
														Difference between means (B - A) ± SEM	-0.5468 ± 0.1123
														95% confidence interval	-0.7970 to -0.2966
														R squared (eta squared)	0.7034
														p-ERK/ERK
														Test for normal distribution
														Shapiro-Wilk test	shNC	shGdnf
														W	0.8951	0.8293
														P value	0.3457	0.1061
														F test to compare variances
														F, DFn, Dfd	1.271, 5, 5
														P value	0.7986
														Unpaired t test
														shNC vs. shGdnf
														P value	0.001
														Difference between means (B - A) ± SEM	-0.4697 ± 0.1023
														95% confidence interval	-0.6976 to -0.2417
														R squared (eta squared)	0.6783

## Sheet: Figure 6-6K
p-FOXO1/FOXO1														p-FOXO1/FOXO1
Group	shNC						shGdnf							Test for normal distribution
Relative Expression	0.728692	0.827398	0.922549	1.79433	0.822835	0.904191	0.522992	0.64768	0.388422	0.64356	0.535316	0.756979		Shapiro-Wilk test	shNC	shGdnf
Mean	1						0.582491							W	0.6637	0.9678
														P value	0.0025	0.8773
														Mann Whitney test
														P value	0.0043
														Exact or approximate P value?	Exact
														P value summary	**

## Sheet: Figure 6-6L
ETS1/β-actin														ETS1/β-actin
Group	shNC						shGdnf							Test for normal distribution
Relative Expression	0.589354	1.00523	0.923529	1.22532	1.15254	1.10402	0.726239	0.763532	0.970652	0.66847	0.690663	0.578707		Shapiro-Wilk test	shNC	shGdnf
Mean	1						0.733044							W	0.8948	0.9108
														P value	0.3443	0.442
														F test to compare variances
														F, DFn, Dfd	2.971, 5, 5
														P value	0.2572
														Unpaired t test
														shNC vs. shGdnf
														P value	0.0325
														Difference between means (B - A) ± SEM	-0.2668 ± 0.1075
														95% confidence interval	-0.5064 to -0.02722
														R squared (eta squared)	0.3811
