# Supplementary material for: Neurons enhance blood–brain barrier function via upregulating claudin-5 and VE-cadherin expression due to glial cell line-derived neurotrophic factor secretion
Source: eLife. 2024 Oct 30;13:RP96161. doi: 10.7554/eLife.96161 (PMC11524583; doi:10.7554/eLife.96161)
Supplement: Table 1—source data 1. [file elife-96161-table1-data1.xlsx]

## Sheet: Sheet1
		Mono-culture BBB Model				Triple co-culture BBB model
Amantadine	Papp(cm/s)	9.30943e-06	5.43847e-06	8.01138e-06	4.60927e-06	3.03657e-06	4.3152e-06	3.22873e-06	3.99662e-06
	Mean	6.84214e-06				3.64428e-06
	SEM	9.49034e-07				2.64133e-07
	PS(μl/min/g)	310.22				165.23
Amitriptyline	Papp(cm/s)	1.66154e-05	1.6393e-05	1.42581e-05	1.36877e-05	1.40394e-05	1.43782e-05	1.45269e-05	1.54895e-05
	Mean	1.52386e-05				1.46085e-05
	SEM	6.42024e-07				2.6922e-07
	PS(μl/min/g)	13716				13149
Buproprion	Papp(cm/s)	1.45374e-05	1.54624e-05	1.55572e-05	1.52204e-05	1.13123e-05	1.06351e-05	1.27796e-05	1.06371e-05
	Mean	1.51944e-05				1.1341e-05
	SEM	1.99342e-07				4.3761e-07
	PS(μl/min/g)	1139.58				850.58
Carbamazepine	Papp(cm/s)	3.69015e-05	3.0256e-05	3.46157e-05	3.57197e-05	1.13025e-05	1.15637e-05	1.19159e-05	1.20662e-05
	Mean	3.43732e-05				1.17121e-05
	SEM	1.25536e-06				1.49315e-07
	PS(μl/min/g)	2666.89				908.69
Clozapine	Papp(cm/s)	3.88787e-05	4.02426e-05	3.73075e-05	3.94539e-05	1.57823e-05	1.80271e-05	8.86471e-06	8.80067e-06
	Mean	3.89707e-05				1.28687e-05
	SEM	5.37702e-07				2.05667e-06
	PS(μl/min/g)	25052.6				8272.72
Donepezil	Papp(cm/s)	2.26195e-05	2.14199e-05	1.85179e-05	2.10944e-05	1.55701e-05	1.47074e-05	1.59488e-05	1.16467e-05
	Mean	2.09129e-05				1.44683e-05
	SEM	7.47423e-07				8.44997e-07
	PS(μl/min/g)	2688.43				1860.43
Doxepin	Papp(cm/s)	1.5218e-05	1.93297e-05	1.42698e-05	1.86827e-05	9.91829e-06	1.37907e-05	9.91806e-06	9.01886e-06
	Mean	1.68751e-05				1.06615e-05
	SEM	1.08473e-06				9.21802e-07
	PS(μl/min/g)	6076.8				3837.6
Fluoxetine	Papp(cm/s)	1.36903e-05	8.97283e-06	1.13148e-05	1.19429e-05	1.35215e-05	8.66731e-06	8.7919e-06	8.89575e-06
	Mean	1.14802e-05				9.96912e-06
	SEM	8.44569e-07				1.02629e-06
	PS(μl/min/g)	25830				22430.2
Gabapentin	Papp(cm/s)	2.05904e-05	1.37579e-05	1.334e-05	1.92951e-05	8.25491e-06	9.41259e-06	8.44022e-06	9.02695e-06
	Mean	1.67459e-05				8.78367e-06
	SEM	1.61646e-06				2.30797e-07
	PS(μl/min/g)	192.77				101.05
Lamotrigine	Papp(cm/s)	1.50427e-05	1.3574e-05	1.49562e-05	1.34844e-05	5.92999e-06	6.28098e-06	5.67526e-06	6.0029e-06
	Mean	1.42643e-05				5.97228e-06
	SEM	3.68229e-07				1.07889e-07
	PS(μl/min/g)	470.11				196.88
Metoclopramide	Papp(cm/s)	1.57194e-05	9.47181e-06	1.42685e-05	1.70923e-05	5.32826e-06	7.57019e-06	7.10638e-06	6.5048e-06
	Mean	1.4138e-05				6.62741e-06
	SEM	1.43655e-06				4.199e-07
	PS(μl/min/g)	348.66				163.41
Midazolam	Papp(cm/s)	2.84549e-05	2.53718e-05	2.30962e-05	2.42867e-05	1.86424e-05	1.98222e-05	1.9193e-05	1.8696e-05
	Mean	2.53024e-05				1.90884e-05
	SEM	9.95045e-07				2.37483e-07
	PS(μl/min/g)	5060				3818
Mirtazapine	Papp(cm/s)	2.27326e-05	2.26756e-05	2.34646e-05	2.48718e-05	1.72051e-05	1.7763e-05	1.8192e-05	1.82883e-05
	Mean	2.34361e-05				1.78621e-05
	SEM	4.4268e-07				2.1389e-07
	PS(μl/min/g)	2637				2009.25
Olanzapine	Papp(cm/s)	1.73562e-05	3.60009e-05	1.96322e-05	1.8655e-05	1.14898e-05	1.31004e-05	1.14687e-05	1.39172e-05
	Mean	2.29111e-05				1.2494e-05
	SEM	3.8002e-06				5.2755e-07
	PS(μl/min/g)	6064.41				3306.18
Prazosin	Papp(cm/s)	4.55777e-06	5.42871e-06	6.66394e-06	5.78678e-06	2.42582e-06	1.97345e-06	4.58537e-06	2.25515e-06
	Mean	5.6093e-06				2.80995e-06
	SEM	3.77665e-07				5.18845e-07
	PS(μl/min/g)	560.93				280.99
Risperidone	Papp(cm/s)	2.59321e-05	1.15084e-05	1.32794e-05	1.36733e-05	1.25494e-05	1.15681e-05	1.1282e-05	1.13893e-05
	Mean	1.60983e-05				1.16972e-05
	SEM	2.8679e-06				2.51276e-07
	PS(μl/min/g)	1463.64				1063.64
Venlafaxine	Papp(cm/s)	1.03071e-05	8.74258e-06	9.52177e-06	9.74994e-06	7.47555e-06	8.49579e-06	9.29325e-06	7.71952e-06
	Mean	9.58033e-06				8.24603e-06
	SEM	2.80863e-07				3.56187e-07
	PS(μl/min/g)	420.6				362.02
Verapamil	Papp(cm/s)	6.71654e-06	6.72677e-06	6.77069e-06	8.60947e-06	5.74798e-06	5.41388e-06	5.59337e-06	5.50398e-06
	Mean	7.20587e-06				5.5648e-06
	SEM	4.05313e-07				6.1668e-08
	PS(μl/min/g)	1965.24				1517.67
