# Supplementary figures and images for: Neurons enhance blood–brain barrier function via upregulating claudin-5 and VE-cadherin expression due to glial cell line-derived neurotrophic factor secretion
Source: eLife journal article supplement (doi:10.7554/elife.96161), 2024-05-29

Figure 4—figure supplement 1C-Claudin-5

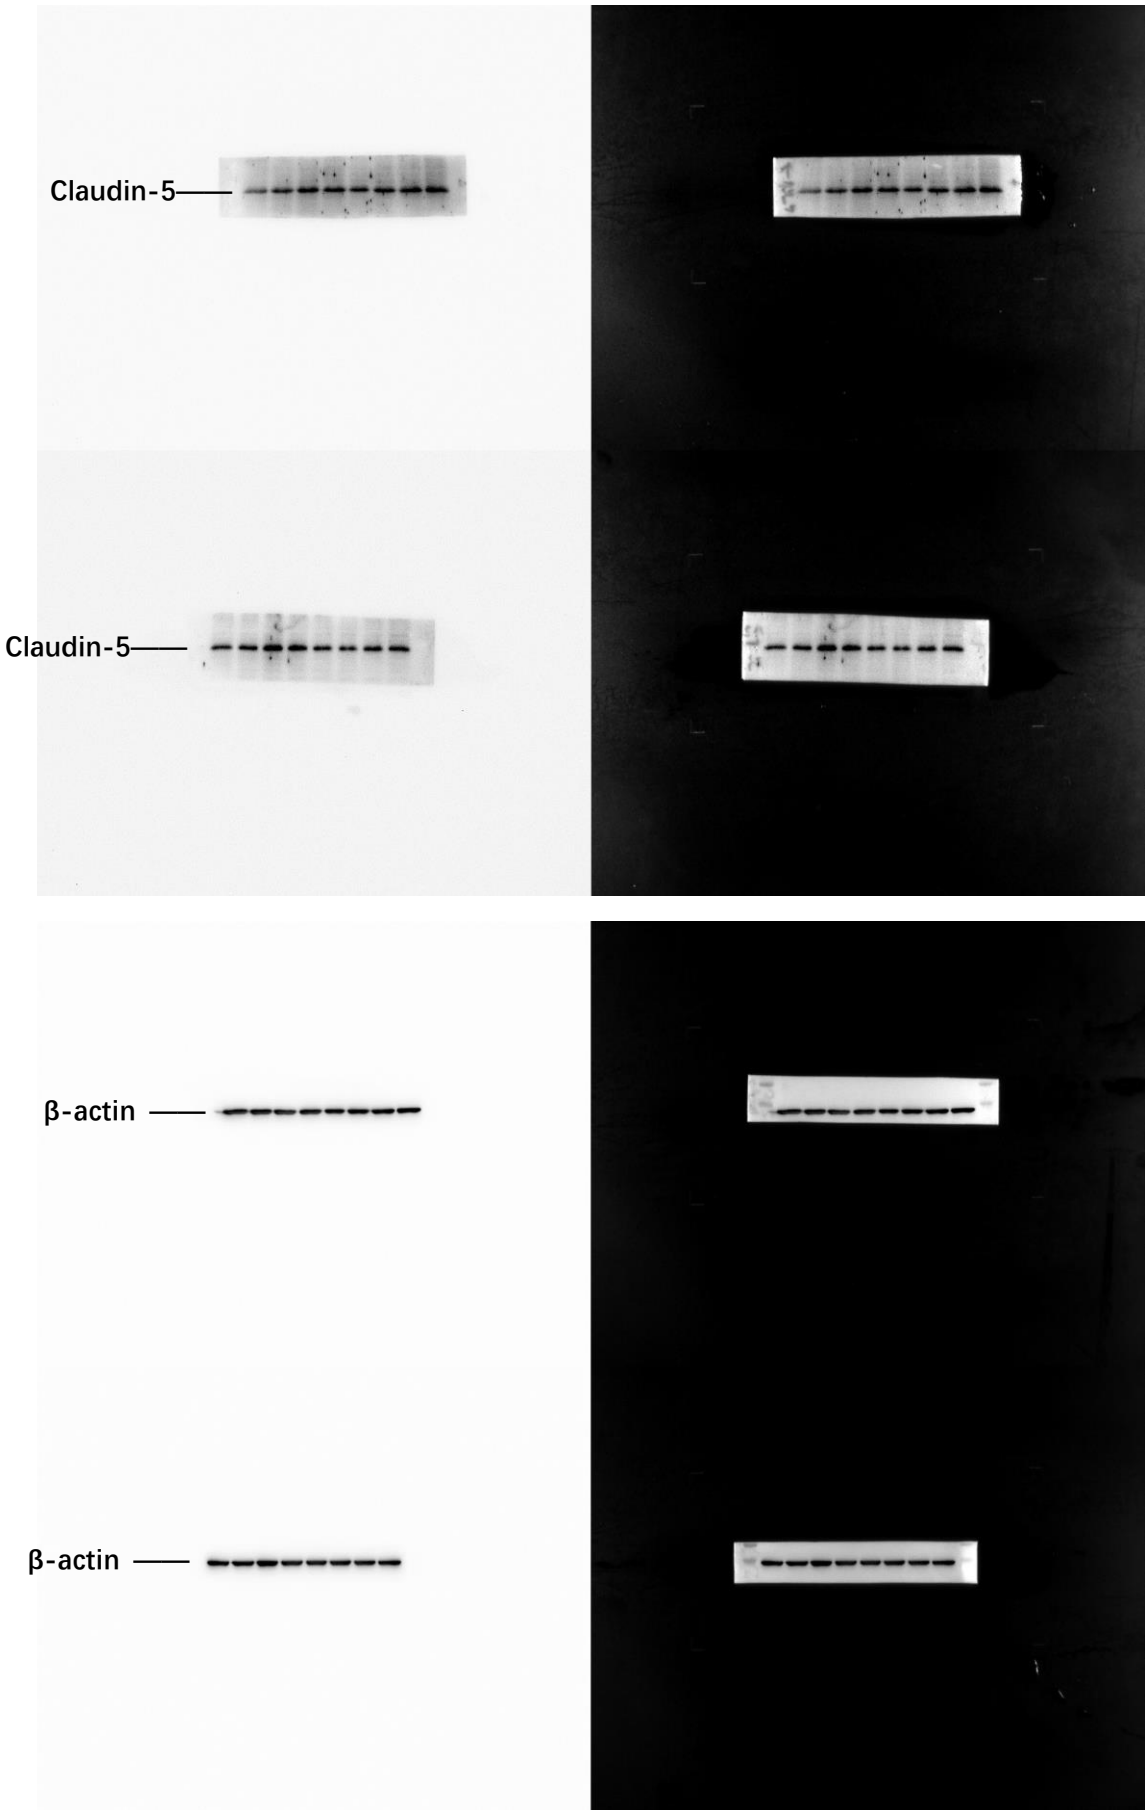

Figure 4—figure supplement 1C-VE-cadherin

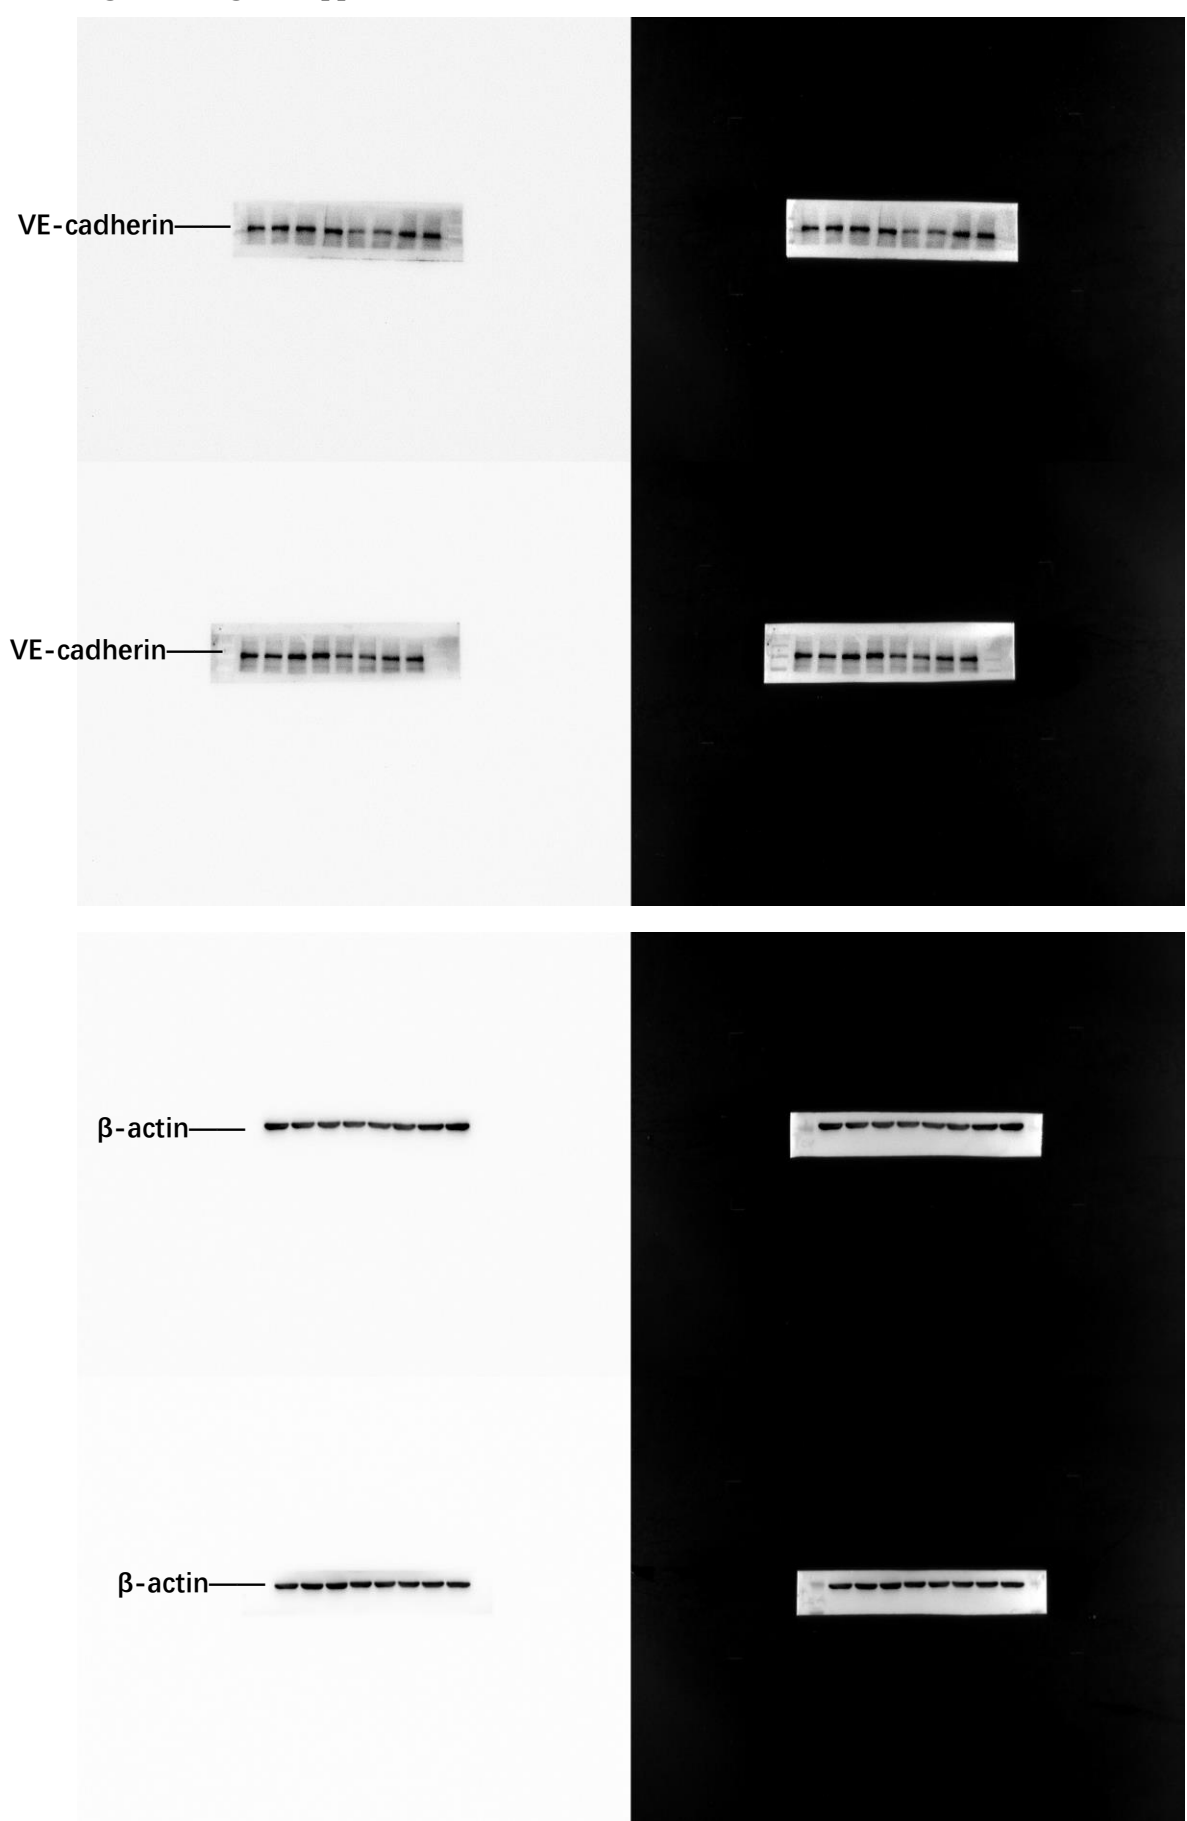

Supplement: fig4-figsupp1-data2 [file elife-96161-fig4-figsupp1-data2-v1.zip]
